# Supplementary material for: Biochemical reconstitution of branching microtubule nucleation
Source: eLife. 2020 Jan 14;9:e49797. doi: 10.7554/eLife.49797 (PMC6959992; doi:10.7554/eLife.49797)
Supplement: Figure 2—source data 1. — Numerical data obtained from the experiment in Figure 2B, and represented graphically in Figure 2C. [file elife-49797-fig2-data1.xlsx]

## Sheet: gTuRC
Microtubule	Area (um^2)	Mean TB intensity	Alexa568 background intensity	Mean minus background	Mean gTuRC intensity	Alexa647 background intensity	Mean minus background	gTuRC/TB intensity
1	2.424	450.849	113	337.849	121.5	112	9.5	0.0281191
2	2.474	494.289	113	381.289	134.872	112	22.872	0.059986
3	3.287	533.737	113	420.737	132.066	112	20.066	0.0476925
4	4.781	568.719	113	455.719	142.427	112	30.427	0.066767
5	2.573	582.426	113	469.426	156.774	112	44.774	0.0953803
6	2.059	463.597	113	350.597	168.548	112	56.548	0.161291
7	5.047	602.099	113	489.099	200.773	112	88.773	0.181503
8	2.274	498.562	113	385.562	128.985	112	16.985	0.0440526
9	3.237	644.441	113	531.441	340.718	112	228.718	0.430373
10	3.005	567.646	113	454.646	237.525	112	125.525	0.276094
11	3.337	642.557	113	529.557	150.358	112	38.358	0.0724341
12	2.955	651.326	113	538.326	143.483	112	31.483	0.0584831
13	2.108	723.772	113	610.772	261.142	112	149.142	0.244186
14	2.059	793.726	113	680.726	142.556	112	30.556	0.0448874
15	3.055	524.054	113	411.054	169.848	112	57.848	0.140731
16	4.549	786.131	113	673.131	257.423	112	145.423	0.21604
17	3.071	707.357	113	594.357	179.254	112	67.254	0.113154
18	2.042	603.114	113	490.114	152.951	112	40.951	0.083554
19	3.204	692.373	113	579.373	304.813	112	192.813	0.332796
20	5.694	587.16	113	474.16	277.563	112	165.563	0.349171
21	2.374	696.965	113	583.965	116.699	112	4.699	0.00804672
22	2.225	765.627	113	652.627	346.799	112	234.799	0.359775
23	3.42	644.811	113	531.811	197.714	112	85.714	0.161174
24	2.573	747.613	113	634.613	285.11	112	173.11	0.27278
25	2.108	576.126	113	463.126	143.11	112	31.11	0.0671739
26	2.075	568	113	455	162.032	112	50.032	0.10996
27	2.075	405.656	113	292.656	133.928	112	21.928	0.0749276
28	2.673	846.814	113	733.814	251.217	112	139.217	0.189717
29	2.706	957.521	113	844.521	316.037	112	204.037	0.241601
30	3.785	817.868	113	704.868	189.539	112	77.539	0.110005
31	4.183	874.21	113	761.21	241.294	112	129.294	0.169853
32	3.005	629.028	113	516.028	190.028	112	78.028	0.151209
33	5.18	727.154	113	614.154	137.048	112	25.048	0.0407846
34	4.266	764.984	113	651.984	307.409	112	195.409	0.299714
35	3.121	954.074	113	841.074	421.734	112	309.734	0.36826
36	6.292	718.077	113	605.077	226.296	112	114.296	0.188895
37	6.657	695.551	113	582.551	168.219	112	56.219	0.0965049
38	4.599	845.892	113	732.892	372.162	112	260.162	0.35498
39	9.728	855.72	113	742.72	238.328	112	126.328	0.170088
40	4.067	838.257	113	725.257	294.122	112	182.122	0.251114
41	4.35	913.534	113	800.534	316.519	112	204.519	0.255478
42	2.191	639.394	113	526.394	212.962	112	100.962	0.191799
43	5.81	910.766	113	797.766	225.357	112	113.357	0.142093
44	2.341	793.922	113	680.922	273.709	112	161.709	0.237485
45	2.108	965.386	113	852.386	254.039	112	142.039	0.166637
46	3.835	800.619	113	687.619	208.277	112	96.277	0.140015
47	2.374	667.063	113	554.063	134.629	112	22.629	0.0408419
48	2.806	865.101	113	752.101	361.278	112	249.278	0.331442
49	2.706	934.828	113	821.828	504.319	112	392.319	0.477374
50	2.374	872.112	113	759.112	335.566	112	223.566	0.29451
51	3.602	673.47	113	560.47	167.917	112	55.917	0.0997681
52	9.927	1091.88	113	978.875	411.107	112	299.107	0.305562
53	3.337	762.05	113	649.05	184.423	112	72.423	0.111583
54	5.462	1003.82	113	890.818	207.322	112	95.322	0.107005
55	3.486	776.652	113	663.652	301.819	112	189.819	0.286022
56	4.067	950.008	113	837.008	185.596	112	73.596	0.0879275
57	2.673	1029.74	113	916.745	342.478	112	230.478	0.251409
58	3.602	710.922	113	597.922	215.922	112	103.922	0.173805
59	3.038	842.262	113	729.262	277.377	112	165.377	0.226773
60	4.333	919.498	113	806.498	394.414	112	282.414	0.350173
61	2.308	827.59	113	714.59	344.165	112	232.165	0.324893
62	2.042	900.504	113	787.504	441.187	112	329.187	0.418013
63	6.026	763.242	113	650.242	330.488	112	218.488	0.33601
64	4.217	618.008	113	505.008	132.268	112	20.268	0.040134
65	2.689	785.265	113	672.265	250.272	112	138.272	0.205681
66	4.266	741.047	113	628.047	248.261	112	136.261	0.21696
67	4.017	902.058	113	789.058	275.05	112	163.05	0.206639
68	5.246	946.582	113	833.582	469.709	112	357.709	0.429123
69	3.337	967.93	113	854.93	466.801	112	354.801	0.415006
70	2.191	548.977	113	435.977	158.765	112	46.765	0.107265
71	3.221	1174.83	113	1061.83	595.175	112	483.175	0.45504
72	4.731	1300.67	113	1187.67	568.344	112	456.344	0.384233
73	2.291	932.188	113	819.188	862.246	112	750.246	0.915841
74	4.781	500.09	113	387.09	140.17	112	28.17	0.0727738
75	2.955	1045.74	113	932.742	284.337	112	172.337	0.184764
76	2.872	1119.15	113	1006.15	539.994	112	427.994	0.425378
77	10.343	1110.91	113	997.91	450.019	112	338.019	0.338727
78	2.507	1083.51	113	970.51	297.841	112	185.841	0.191488
79	2.274	974.905	113	861.905	593.628	112	481.628	0.558795
80	7.57	1139.09	113	1026.09	539.458	112	427.458	0.41659
81	2.108	544.764	113	431.764	141.535	112	29.535	0.0684054
82	3.768	815.767	113	702.767	309.881	112	197.881	0.281574
83	2.291	1087.35	113	974.348	362.239	112	250.239	0.256827
84	4.001	957.822	113	844.822	285.187	112	173.187	0.204998
85	2.789	1186.49	113	1073.49	406.054	112	294.054	0.273924
86	2.009	1063.96	113	950.959	534.496	112	422.496	0.444284
87	4.964	1101.31	113	988.308	505.699	112	393.699	0.398357
88	2.191	1178.05	113	1065.05	1095.78	112	983.78	0.923698
89	2.507	1100.35	113	987.351	411.185	112	299.185	0.303018
90	3.951	1242.86	113	1129.86	261.214	112	149.214	0.132065
91	7.769	1009.16	113	896.156	385.739	112	273.739	0.305459
92	5.661	1178.04	113	1065.04	329.584	112	217.584	0.204296
93	5.827	1158.39	113	1045.39	434.997	112	322.997	0.308972
94	6.873	934.246	113	821.246	406.043	112	294.043	0.358045
95	2.158	830.954	113	717.954	222.254	112	110.254	0.153567
96	2.308	1118.65	113	1005.65	258.712	112	146.712	0.145887
97	4.084	1031.01	113	918.012	347.492	112	235.492	0.256524
98	5.976	720.692	113	607.692	155.403	112	43.403	0.0714227
99	2.291	1019.8	113	906.804	404.239	112	292.239	0.322274
100	4.897	1040.37	113	927.373	306.827	112	194.827	0.210085
101	2.872	785.532	113	672.532	239.775	112	127.775	0.189991
102	2.374	1183.41	113	1070.41	420.874	112	308.874	0.288556
103	3.104	570.422	113	457.422	217.027	112	105.027	0.229606
104	2.324	748.121	113	635.121	264.6	112	152.6	0.240269
105	2.889	664.517	113	551.517	351.213	112	239.213	0.433736
106	6.823	928.754	113	815.754	413.28	112	301.28	0.369327
107	2.175	772.336	113	659.336	255.962	112	143.962	0.218344
108	3.918	1162.02	113	1049.02	561.983	112	449.983	0.428955
109	2.822	916.876	113	803.876	654.335	112	542.335	0.67465
110	2.44	866.252	113	753.252	187.136	112	75.136	0.0997488
111	4.848	1113.44	113	1000.44	359.678	112	247.678	0.24757
112	3.254	963.995	113	850.995	372.934	112	260.934	0.306622
113	5.927	1154.78	113	1041.78	433.896	112	321.896	0.308988
114	7.338	1088.78	113	975.776	486.665	112	374.665	0.383966
115	3.619	717.936	113	604.936	370.986	112	258.986	0.428121
116	3.038	1127.2	113	1014.2	695.213	112	583.213	0.575049
117	3.602	1176.97	113	1063.97	334.525	112	222.525	0.209146
118	2.59	1083.18	113	970.179	460.333	112	348.333	0.35904
119	2.125	1120.49	113	1007.49	872.453	112	760.453	0.754798
120	5.196	1000.3	113	887.297	486.064	112	374.064	0.421577
121	2.142	458.651	113	345.651	155.876	112	43.876	0.126937
122	3.187	909.5	113	796.5	410.734	112	298.734	0.375058
123	6.209	1128.53	113	1015.53	194.126	112	82.126	0.0808702
124	3.071	480.319	113	367.319	134.114	112	22.114	0.0602038
125	7.155	713.369	113	600.369	216.942	112	104.942	0.174796
126	4.316	963.488	113	850.488	553.758	112	441.758	0.519417
127	2.872	835.775	113	722.775	346.139	112	234.139	0.323945
128	8.052	903.825	113	790.825	237.551	112	125.551	0.15876
129	3.752	857.381	113	744.381	195.058	112	83.058	0.11158
130	3.154	682.653	113	569.653	140.821	112	28.821	0.050594
131	2.092	1180.5	113	1067.5	629.984	112	517.984	0.485231
132	9.894	1017.11	113	904.109	447.367	112	335.367	0.370936
133	3.038	843.126	113	730.126	246.956	112	134.956	0.184839
134	3.304	935.397	113	822.397	222.191	112	110.191	0.133988
135	2.772	1145.77	113	1032.77	473.138	112	361.138	0.34968
136	3.287	635.121	113	522.121	209.854	112	97.854	0.187416
137	3.088	665.306	113	552.306	246.022	112	134.022	0.242659
138	4.316	913.227	113	800.227	282.954	112	170.954	0.213632
139	3.237	989.087	113	876.087	382.944	112	270.944	0.309266
140	2.474	885.678	113	772.678	321.336	112	209.336	0.270923
141	6.259	1027.72	113	914.724	495.716	112	383.716	0.419488
142	5.063	727.128	113	614.128	176.784	112	64.784	0.105489
143	2.341	1039.2	113	926.199	518	112	406	0.438351
144	2.424	673.11	113	560.11	187.774	112	75.774	0.135284
145	6.624	644.336	113	531.336	162.185	112	50.185	0.0944506
146	4.615	748.511	113	635.511	326.295	112	214.295	0.337201
147	3.602	773.147	113	660.147	305.23	112	193.23	0.292708
148	5.462	1031.85	113	918.845	435.131	112	323.131	0.351671
149	3.171	956.696	113	843.696	258.408	112	146.408	0.173532
150	2.042	813.285	113	700.285	322.813	112	210.813	0.301039
151	2.208	710.038	113	597.038	223.226	112	111.226	0.186296
152	2.042	861.959	113	748.959	266.715	112	154.715	0.206573
153	4.599	810.032	113	697.032	399.599	112	287.599	0.412605
154	2.789	867.393	113	754.393	125.036	112	13.036	0.0172801
155	2.258	896.375	113	783.375	222.029	112	110.029	0.140455
156	5.794	713.029	113	600.029	194.393	112	82.393	0.137315
157	4.001	885.66	113	772.66	372.788	112	260.788	0.33752
158	2.955	814.848	113	701.848	177.079	112	65.079	0.0927252
159	4.864	791.485	113	678.485	319.29	112	207.29	0.305519
160	3.154	833.611	113	720.611	176.863	112	64.863	0.0900111
161	2.357	844.148	113	731.148	274.183	112	162.183	0.22182
162	2.175	427.885	113	314.885	155.496	112	43.496	0.138133
163	2.457	865.318	113	752.318	306.27	112	194.27	0.258229
164	2.955	696.118	113	583.118	270.264	112	158.264	0.27141
165	3.569	1039.37	113	926.372	347.465	112	235.465	0.25418
166	3.47	742.421	113	629.421	235.895	112	123.895	0.19684
167	2.507	680.735	113	567.735	294.477	112	182.477	0.321412
168	2.523	456.243	113	343.243	135.414	112	23.414	0.0682141
169	5.346	799.047	113	686.047	255.562	112	143.562	0.20926
170	3.187	776.495	113	663.495	251.828	112	139.828	0.210745
171	2.623	496.348	113	383.348	136.057	112	24.057	0.062755
172	2.872	759.971	113	646.971	143.815	112	31.815	0.0491753
173	2.839	704.485	113	591.485	190.678	112	78.678	0.133018
174	2.822	591.476	113	478.476	152.465	112	40.465	0.0845706
175	5.113	621.328	113	508.328	278.597	112	166.597	0.327735
176	4.399	646.445	113	533.445	145.158	112	33.158	0.0621582
177	2.158	637.838	113	524.838	117.515	112	5.515	0.010508
178	3.42	512.204	113	399.204	152.515	112	40.515	0.101489
179	3.005	512.122	113	399.122	180.989	112	68.989	0.172852
180	2.889	502	113	389	167.414	112	55.414	0.142452
181	2.142	473	113	360	172.589	112	60.589	0.168303
182	2.208	569.376	113	456.376	159.256	112	47.256	0.103546
183	2.009	579.24	113	466.24	134.264	112	22.264	0.0477522
184	2.142	537.473	113	424.473	135.651	112	23.651	0.0557185
185	2.059	426.444	113	313.444	192.363	112	80.363	0.256387
186	2.391	495.806	113	382.806	134.34	112	22.34	0.0583585
187	2.44	464.544	113	351.544	161.81	112	49.81	0.141689
188	3.038	459.639	113	346.639	229	112	117	0.337527
189	2.059	485.685	113	372.685	130.065	112	18.065	0.0484726
190	3.154	668.368	113	555.368	164.821	112	52.821	0.0951099
191	4.549	527.719	113	414.719	191.595	112	79.595	0.191925
192	3.337	497.468	113	384.468	146.607	112	34.607	0.0900127
193	2.723	539.366	113	426.366	121.866	112	9.866	0.0231397
194	3.719	629.844	113	516.844	174.978	112	62.978	0.121851
195	2.889	524.057	113	411.057	190.207	112	78.207	0.190258
196	2.274	707.978	113	594.978	156.978	112	44.978	0.0755961
197	3.055	589.565	113	476.565	241.245	112	129.245	0.271201
198	5.528	700.745	113	587.745	227.508	112	115.508	0.196527
199	4.781	525.375	113	412.375	205.438	112	93.438	0.226585
200	2.009	652.612	113	539.612	182.645	112	70.645	0.130918
201	2.075	730.72	113	617.72	260.592	112	148.592	0.240549
202	6.806	780.841	113	667.841	214.8	112	102.8	0.153929
203	6.425	834.003	113	721.003	236.083	112	124.083	0.172098
204	3.088	616.715	113	503.715	158.823	112	46.823	0.0929553
205	3.055	676.918	113	563.918	437.772	112	325.772	0.577694
206	2.723	760.195	113	647.195	238.25	112	126.25	0.195073
207	2.374	541.545	113	428.545	137.902	112	25.902	0.0604417
208	6.209	778.238	113	665.238	194.757	112	82.757	0.124402
209	5.362	757.074	113	644.074	302.176	112	190.176	0.29527
210	6.259	623.178	113	510.178	202.016	112	90.016	0.17644
211	4.532	776.648	113	663.648	299.586	112	187.586	0.282659
212	8.583	897.636	113	784.636	202.783	112	90.783	0.115701
213	9.18	796.868	113	683.868	186.765	112	74.765	0.109327
214	2.507	587.192	113	474.192	194.45	112	82.45	0.173875
215	2.872	716.098	113	603.098	127.104	112	15.104	0.025044
216	2.64	830.101	113	717.101	212.094	112	100.094	0.139581
217	8.716	759.954	113	646.954	167.472	112	55.472	0.0857433
218	7.072	769.465	113	656.465	180.493	112	68.493	0.104336
219	2.44	546.367	113	433.367	218.245	112	106.245	0.245162
220	2.059	549.185	113	436.185	157.815	112	45.815	0.105036
221	3.586	786.787	113	673.787	254.088	112	142.088	0.21088
222	6.425	689.049	113	576.049	158.685	112	46.685	0.0810435
223	2.49	647.033	113	534.033	189.84	112	77.84	0.145759
224	2.806	872.574	113	759.574	221.964	112	109.964	0.144771
225	2.54	691.856	113	578.856	283.895	112	171.895	0.296956
226	3.602	791.788	113	678.788	174.47	112	62.47	0.0920317
227	2.158	608.569	113	495.569	132.323	112	20.323	0.0410094
228	3.121	947.059	113	834.059	202.686	112	90.686	0.108729
229	4.715	872.528	113	759.528	283.859	112	171.859	0.226271
230	3.519	688.608	113	575.608	189.071	112	77.071	0.133895
231	3.901	942.77	113	829.77	286.374	112	174.374	0.210147
232	3.536	477.756	113	364.756	154.826	112	42.826	0.11741
233	3.984	669.983	113	556.983	212.2	112	100.2	0.179898
234	6.458	587.411	113	474.411	184.018	112	72.018	0.151805
235	3.071	901.973	113	788.973	301.281	112	189.281	0.239908
236	4.748	726.608	113	613.608	173.766	112	61.766	0.10066
237	2.557	849.74	113	736.74	308.221	112	196.221	0.266337
238	5.81	940.197	113	827.197	288.394	112	176.394	0.213243
239	4.665	782.053	113	669.053	145.406	112	33.406	0.0499303
240	2.191	762.182	113	649.182	285.386	112	173.386	0.267084
241	6.259	882.844	113	769.844	300.027	112	188.027	0.24424
242	3.652	893.336	113	780.336	367.359	112	255.359	0.327242
243	4.516	953.309	113	840.309	243.103	112	131.103	0.156018
244	3.818	888.235	113	775.235	256.374	112	144.374	0.186233
245	2.557	873.682	113	760.682	346.675	112	234.675	0.308506
246	3.918	750.538	113	637.538	198.805	112	86.805	0.136157
247	2.855	745.645	113	632.645	250.663	112	138.663	0.21918
248	2.822	822.853	113	709.853	451.959	112	339.959	0.478915
249	2.324	831.764	113	718.764	126.107	112	14.107	0.0196267
250	2.623	532.557	113	419.557	165.259	112	53.259	0.126941
251	3.055	965.266	113	852.266	274.5	112	162.5	0.190668
252	2.822	901.176	113	788.176	298.012	112	186.012	0.236003
253	6.292	1026.44	113	913.443	262.264	112	150.264	0.164503
254	3.934	784.439	113	671.439	201.612	112	89.612	0.133463
255	2.905	797.92	113	684.92	293.571	112	181.571	0.265098
256	3.187	682.333	113	569.333	207.76	112	95.76	0.168197
257	7.504	764.389	113	651.389	278.206	112	166.206	0.255156
258	2.806	677.036	113	564.036	194.391	112	82.391	0.146074
259	2.673	731.273	113	618.273	194.031	112	82.031	0.132678
260	3.104	488.578	113	375.578	147.963	112	35.963	0.0957537
261	5.528	749.733	113	636.733	244.414	112	132.414	0.207958
262	3.187	927.911	113	814.911	554.182	112	442.182	0.542614
263	3.221	756.907	113	643.907	163.412	112	51.412	0.0798438
264	2.324	996.471	113	883.471	366.85	112	254.85	0.288464
265	3.984	1003.24	113	890.242	185.796	112	73.796	0.0828943
266	3.287	804.182	113	691.182	258.672	112	146.672	0.212205
267	2.905	556.349	113	443.349	141.114	112	29.114	0.0656684
268	2.391	581.389	113	468.389	194.014	112	82.014	0.175098
269	5.362	698.579	113	585.579	240.111	112	128.111	0.218777
270	2.025	793.656	113	680.656	463.992	112	351.992	0.517136
271	5.279	810.217	113	697.217	176.365	112	64.365	0.092317
272	6.956	1093.46	113	980.456	695.029	112	583.029	0.594651
273	2.889	1154.32	113	1041.32	155.632	112	43.632	0.0419008
274	5.279	800.484	113	687.484	303.748	112	191.748	0.278913
275	3.038	852.055	113	739.055	358.492	112	246.492	0.333523
276	7.288	1034.52	113	921.515	401.294	112	289.294	0.313933
277	2.49	942.653	113	829.653	573.96	112	461.96	0.556811
278	3.254	716.061	113	603.061	171.934	112	59.934	0.099383
279	2.025	979.598	113	866.598	277.254	112	165.254	0.190693
280	2.341	494.546	113	381.546	165.816	112	53.816	0.141047
281	2.905	926.731	113	813.731	353.097	112	241.097	0.296286
282	2.158	1109.59	113	996.592	310.323	112	198.323	0.199001
283	4.532	848.183	113	735.183	308.927	112	196.927	0.267861
284	2.789	916.065	113	803.065	319.685	112	207.685	0.258615
285	2.308	549.899	113	436.899	176.209	112	64.209	0.146965
286	5.113	1026.05	113	913.049	427.932	112	315.932	0.346019
287	2.806	576.343	113	463.343	173.195	112	61.195	0.132073
288	4.383	1098.46	113	985.462	410.636	112	298.636	0.303042
289	4.848	1067.61	113	954.613	319.154	112	207.154	0.217003
290	2.64	945.145	113	832.145	262.377	112	150.377	0.18071
291	3.984	485.962	113	372.962	151.258	112	39.258	0.10526
292	2.507	964.219	113	851.219	205.848	112	93.848	0.110251
293	2.191	991.129	113	878.129	445.462	112	333.462	0.379741
294	2.756	845.723	113	732.723	327.807	112	215.807	0.294527
295	9.695	1127.37	113	1014.37	426.541	112	314.541	0.310087
296	6.624	914.967	113	801.967	169.827	112	57.827	0.0721065
297	2.59	923.494	113	810.494	328.071	112	216.071	0.266592
298	2.374	978.671	113	865.671	271.273	112	159.273	0.183988
299	2.59	1107.38	113	994.378	359.756	112	247.756	0.249157
300	2.025	418.467	113	305.467	142.033	112	30.033	0.0983183
301	6.109	895.617	113	782.617	197.633	112	85.633	0.109419
302	2.108	433.031	113	320.031	165.102	112	53.102	0.165928
303	4.881	751.456	113	638.456	341.694	112	229.694	0.359765
304	2.739	735.091	113	622.091	167.667	112	55.667	0.0894837
305	2.142	727.791	113	614.791	470.992	112	358.992	0.583925
306	3.768	1041.46	113	928.458	226.753	112	114.753	0.123595
307	4.001	807.216	113	694.216	470.34	112	358.34	0.516179
308	8.749	890.647	113	777.647	301.366	112	189.366	0.243512
309	6.607	1162.57	113	1049.57	643.761	112	531.761	0.506649
310	8.101	1112.29	113	999.289	368.436	112	256.436	0.256618
311	3.088	850.151	113	737.151	438.973	112	326.973	0.443563
312	2.208	555.707	113	442.707	187.023	112	75.023	0.169464
313	2.241	895.6	113	782.6	439.104	112	327.104	0.417971
314	2.291	1057.87	113	944.87	277.42	112	165.42	0.175072
315	10.442	915.421	113	802.421	271.294	112	159.294	0.198517
316	2.042	1002.11	113	889.106	494.715	112	382.715	0.430449
317	4.117	1115.47	113	1002.47	326.996	112	214.996	0.214467
318	6.474	800.403	113	687.403	205.944	112	93.944	0.136665
319	5.744	818.991	113	705.991	205.864	112	93.864	0.132954
320	4.698	956.251	113	843.251	424.512	112	312.512	0.370604
321	3.901	992.902	113	879.902	362.949	112	250.949	0.285201
322	2.009	573.306	113	460.306	119.562	112	7.562	0.0164282
323	2.872	943.688	113	830.688	290.197	112	178.197	0.214517
324	2.523	744.921	113	631.921	250.276	112	138.276	0.218818
325	6.889	918.369	113	805.369	350.171	112	238.171	0.295729
326	9.512	687.494	113	574.494	239.939	112	127.939	0.222699
327	2.623	895.475	113	782.475	284.487	112	172.487	0.220438
328	7.803	996.323	113	883.323	412.057	112	300.057	0.339691
329	2.872	694.145	113	581.145	289.064	112	177.064	0.304681
330	3.403	876.893	113	763.893	254.307	112	142.307	0.186292
331	7.886	835.743	113	722.743	282.598	112	170.598	0.236042
332	6.79	1021.93	113	908.932	391.988	112	279.988	0.308041
333	4.449	613.769	113	500.769	250.205	112	138.205	0.275986
334	4.897	663.793	113	550.793	186.99	112	74.99	0.136149
335	5.595	913.528	113	800.528	195.193	112	83.193	0.103923
336	3.47	492.478	113	379.478	174.636	112	62.636	0.165058
337	3.42	916.767	113	803.767	208.927	112	96.927	0.120591
338	3.387	932.225	113	819.225	381.289	112	269.289	0.328712
339	7.935	895.151	113	782.151	285.153	112	173.153	0.221381
340	4.98	854.517	113	741.517	347.253	112	235.253	0.317259
341	6.408	803.997	113	690.997	263.855	112	151.855	0.219762
342	4.134	810.948	113	697.948	465.679	112	353.679	0.506741
343	13.646	874.511	113	761.511	175.748	112	63.748	0.0837125
344	7.769	893.434	113	780.434	296.024	112	184.024	0.235797
345	10.857	935.557	113	822.557	253.28	112	141.28	0.171757
346	8.151	706.589	113	593.589	227.308	112	115.308	0.194256
347	4.947	583.396	113	470.396	200.95	112	88.95	0.189096
348	2.374	420.944	113	307.944	174.552	112	62.552	0.203128
349	3.984	697.733	113	584.733	201.479	112	89.479	0.153025
350	2.075	854.256	113	741.256	289.024	112	177.024	0.238816
351	2.889	518.471	113	405.471	147.563	112	35.563	0.0877079
352	2.523	399.967	113	286.967	122.796	112	10.796	0.0376211
353	3.835	865.87	113	752.87	324.403	112	212.403	0.282124
354	2.756	865.988	113	752.988	281.163	112	169.163	0.224656
355	2.125	576.68	113	463.68	290.039	112	178.039	0.38397
356	3.802	778.397	113	665.397	221.328	112	109.328	0.164305
357	2.938	443	113	330	143.158	112	31.158	0.0944182
358	8.666	786.228	113	673.228	223.454	112	111.454	0.165552
359	2.839	660.708	113	547.708	165.31	112	53.31	0.0973329
360	2.955	633.607	113	520.607	226.152	112	114.152	0.219267
361	2.341	659.489	113	546.489	204.957	112	92.957	0.170099
362	2.357	459.514	113	346.514	160.437	112	48.437	0.139784
363	3.287	754.707	113	641.707	153.359	112	41.359	0.0644515
364	3.868	665.017	113	552.017	178.167	112	66.167	0.119864
365	4.897	752.431	113	639.431	254.637	112	142.637	0.223069
366	3.586	703.259	113	590.259	251.38	112	139.38	0.236134
367	2.507	736.616	113	623.616	253.801	112	141.801	0.227385
368	3.337	776.308	113	663.308	234.945	112	122.945	0.185351
369	3.553	684.766	113	571.766	238.902	112	126.902	0.221947
370	4.233	782.271	113	669.271	273.039	112	161.039	0.240619
371	2.756	813.428	113	700.428	273.157	112	161.157	0.230084
372	3.569	690.298	113	577.298	224.926	112	112.926	0.195611
373	2.573	671.316	113	558.316	154.335	112	42.335	0.0758262
374	3.503	582.758	113	469.758	249.275	112	137.275	0.292225
375	5.03	698.036	113	585.036	299.789	112	187.789	0.320987
376	2.59	658.5	113	545.5	206.276	112	94.276	0.172825
377	2.49	541.14	113	428.14	200.033	112	88.033	0.205617
378	2.108	451.756	113	338.756	151.386	112	39.386	0.116267
379	5.18	591.163	113	478.163	207.554	112	95.554	0.199836
380	2.756	567.217	113	454.217	171.777	112	59.777	0.131604
381	2.839	493.509	113	380.509	149.17	112	37.17	0.0976849
382	5.495	685.958	113	572.958	232.492	112	120.492	0.210298
383	2.175	595.603	113	482.603	192.366	112	80.366	0.166526
384	2.424	427.103	113	314.103	201.075	112	89.075	0.283585
385	2.158	532.8	113	419.8	145.869	112	33.869	0.0806789
386	2.955	437.478	113	324.478	167.68	112	55.68	0.171599
387	3.619	452.046	113	339.046	155.748	112	43.748	0.129033
388	4.731	516.586	113	403.586	192.379	112	80.379	0.199162
389	2.689	596.796	113	483.796	189.519	112	77.519	0.160231
390	6.624	600.614	113	487.614	189.564	112	77.564	0.159068
391	9.977	608.255	113	495.255	204.656	112	92.656	0.187087
392	4.565	550.502	113	437.502	144.924	112	32.924	0.0752545
393	2.972	480.821	113	367.821	179.899	112	67.899	0.184598
394	2.673	489.627	113	376.627	119.851	112	7.851	0.0208456
395	3.088	518.844	113	405.844	157.253	112	45.253	0.111503
396	3.536	417.019	113	304.019	165.146	112	53.146	0.174811
397	2.557	527.461	113	414.461	237.922	112	125.922	0.303821
398	2.374	482.615	113	369.615	145.531	112	33.531	0.0907187
399	2.059	470.524	113	357.524	169.565	112	57.565	0.16101
400	2.523	431.849	113	318.849	124.862	112	12.862	0.0403388
401	4.698	590.618	113	477.618	145.473	112	33.473	0.0700832
402	2.009	448.504	113	335.504	110.802	112	0	0
403	2.125	458.578	113	345.578	127.273	112	15.273	0.0441955
404	3.553	508.879	113	395.879	116.771	112	4.771	0.0120517
405	4.416	613.105	113	500.105	175.703	112	63.703	0.127379
406	2.258	485.353	113	372.353	112.096	112	0.096	0.00025782
407	2.689	527.451	113	414.451	191.444	112	79.444	0.191685
408	2.656	498.981	113	385.981	164.169	112	52.169	0.13516
409	2.357	500.5	113	387.5	161.218	112	49.218	0.127014
410	4.067	707.106	113	594.106	181.016	112	69.016	0.116168
411	2.407	601.193	113	488.193	151.71	112	39.71	0.0813408
412	2.789	578.524	113	465.524	191.613	112	79.613	0.171018
413	2.789	665.083	113	552.083	193.887	112	81.887	0.148324
414	9.247	784.061	113	671.061	203.237	112	91.237	0.135959
415	7.471	658.973	113	545.973	218.667	112	106.667	0.19537
416	2.689	656.636	113	543.636	160.377	112	48.377	0.0889879
417	2.806	690.757	113	577.757	173.32	112	61.32	0.106135
418	2.54	738.196	113	625.196	235.869	112	123.869	0.198128
419	2.673	593.124	113	480.124	149.236	112	37.236	0.077555
420	5.528	772.42	113	659.42	140.021	112	28.021	0.0424934
421	5.03	669.314	113	556.314	172.389	112	60.389	0.108552
422	3.088	782.817	113	669.817	145.586	112	33.586	0.0501421
423	4.615	633.827	113	520.827	216.795	112	104.795	0.201209
424	2.391	678.347	113	565.347	269.972	112	157.972	0.279425
425	2.092	832.77	113	719.77	224.937	112	112.937	0.156907
426	2.142	1070.84	113	957.837	161.829	112	49.829	0.0520224
427	3.154	786.768	113	673.768	210.789	112	98.789	0.146622
428	7.105	845.867	113	732.867	284.741	112	172.741	0.235706
429	5.395	764.046	113	651.046	284.929	112	172.929	0.265617
430	4.516	796.206	113	683.206	194.324	112	82.324	0.120497
431	2.59	501.404	113	388.404	172.949	112	60.949	0.156922
432	13.414	596.39	113	483.39	166.83	112	54.83	0.113428
433	12.252	962.179	113	849.179	327.53	112	215.53	0.25381
434	5.445	732.665	113	619.665	215.579	112	103.579	0.167153
435	10.06	742.835	113	629.835	208.95	112	96.95	0.153929
436	3.503	831.223	113	718.223	239.649	112	127.649	0.177729
437	4.084	732.366	113	619.366	328.557	112	216.557	0.349643
438	2.822	751.653	113	638.653	287.788	112	175.788	0.275248
439	4.466	848.405	113	735.405	187.848	112	75.848	0.103138
440	4.399	921.472	113	808.472	409.785	112	297.785	0.368331
441	2.54	490.699	113	377.699	158.085	112	46.085	0.122015
442	6.059	672.359	113	559.359	275.69	112	163.69	0.292639
443	3.337	697.517	113	584.517	189.672	112	77.672	0.132882
444	4.997	901.96	113	788.96	424.764	112	312.764	0.396426
445	5.329	767.95	113	654.95	230.536	112	118.536	0.180985
446	2.357	533.979	113	420.979	282.831	112	170.831	0.405795
447	4.499	903.266	113	790.266	494.004	112	382.004	0.483387
448	2.507	755.967	113	642.967	248.318	112	136.318	0.212014
449	4.947	737.433	113	624.433	244.597	112	132.597	0.212348
450	5.81	814.123	113	701.123	232.751	112	120.751	0.172225
451	4.516	697.912	113	584.912	181.404	112	69.404	0.118657
452	2.523	775.967	113	662.967	268.704	112	156.704	0.236368
453	3.503	850.716	113	737.716	311.479	112	199.479	0.270401
454	3.121	864.936	113	751.936	195.75	112	83.75	0.111379
455	3.337	690.861	113	577.861	127.438	112	15.438	0.0267158
456	4.416	898.004	113	785.004	246.192	112	134.192	0.170944
457	3.752	659.956	113	546.956	206.637	112	94.637	0.173025
458	2.457	891.392	113	778.392	185.926	112	73.926	0.0949727
459	4.997	742.229	113	629.229	301.99	112	189.99	0.301941
460	2.723	632.189	113	519.189	113.311	112	1.311	0.00252509
461	2.772	1086.06	113	973.06	424.665	112	312.665	0.321321
462	2.905	566.834	113	453.834	142.994	112	30.994	0.0682937
463	5.91	951.972	113	838.972	239.239	112	127.239	0.151661
464	2.839	667.842	113	554.842	285.895	112	173.895	0.313414
465	4.665	584.217	113	471.217	123.915	112	11.915	0.0252856
466	5.279	795.893	113	682.893	328.94	112	216.94	0.317678
467	3.553	984.542	113	871.542	466.313	112	354.313	0.406536
468	6.043	594.703	113	481.703	207.286	112	95.286	0.197811
469	2.806	815.467	113	702.467	135.964	112	23.964	0.0341141
470	2.092	878.865	113	765.865	204.532	112	92.532	0.12082
471	3.121	952.367	113	839.367	320.585	112	208.585	0.248503
472	2.59	591.545	113	478.545	258.679	112	146.679	0.30651
473	3.47	801.713	113	688.713	353.177	112	241.177	0.350185
474	2.689	889.019	113	776.019	205.019	112	93.019	0.119867
475	4.549	719.752	113	606.752	161.759	112	49.759	0.0820088
476	4.615	1064.23	113	951.234	207.025	112	95.025	0.0998966
477	4.167	778.135	113	665.135	217.749	112	105.749	0.158989
478	2.208	641.301	113	528.301	223.722	112	111.722	0.211474
479	2.009	533.306	113	420.306	207.603	112	95.603	0.22746
480	2.756	486.38	113	373.38	188.747	112	76.747	0.205547
481	3.104	486.706	113	373.706	158.749	112	46.749	0.125096
482	3.237	1083.79	113	970.785	280.256	112	168.256	0.17332
483	3.254	1113.01	113	1000.01	1048.03	112	936.031	0.936026
484	4.98	1062.77	113	949.773	356.643	112	244.643	0.25758
485	7.786	924.22	113	811.22	382.706	112	270.706	0.333702
486	3.187	945	113	832	341.193	112	229.193	0.275472
487	4.3	920.618	113	807.618	379.51	112	267.51	0.331233
488	4.665	1061.39	113	948.388	316.367	112	204.367	0.215489
489	3.121	1116.22	113	1003.22	861.133	112	749.133	0.74673
490	5.545	760.82	113	647.82	344.084	112	232.084	0.358254
491	7.703	746.735	113	633.735	218.593	112	106.593	0.168198
492	3.835	747.866	113	634.866	197.727	112	85.727	0.135032
493	3.005	875.508	113	762.508	379.663	112	267.663	0.35103
494	2.772	564.605	113	451.605	225.581	112	113.581	0.251505
495	2.108	985.331	113	872.331	620.354	112	508.354	0.582754
496	2.158	549.562	113	436.562	151.108	112	39.108	0.0895818
497	3.187	741.698	113	628.698	215.099	112	103.099	0.163988
498	6.425	562.052	113	449.052	283.866	112	171.866	0.382731
499	7.388	710.978	113	597.978	201.175	112	89.175	0.149128
500	2.938	765.367	113	652.367	264.842	112	152.842	0.234288
501	6.159	1052.15	113	939.148	393.714	112	281.714	0.299968
502	4.034	701.276	113	588.276	157.881	112	45.881	0.0779923
503	4.333	1083.25	113	970.253	446.732	112	334.732	0.344995
504	5.661	1205.83	113	1092.83	417.578	112	305.578	0.279621
505	2.175	876.557	113	763.557	213.481	112	101.481	0.132906
506	2.806	952.538	113	839.538	210.959	112	98.959	0.117873
507	2.723	695.463	113	582.463	230.854	112	118.854	0.204054
508	2.424	733.753	113	620.753	304.74	112	192.74	0.310494
509	4.881	1007.71	113	894.711	485.031	112	373.031	0.416929
510	4.084	979.26	113	866.26	228.106	112	116.106	0.134031
511	4.482	1173.44	113	1060.44	566.978	112	454.978	0.429045
512	7.305	742.125	113	629.125	252.455	112	140.455	0.223255
513	2.424	931.164	113	818.164	438.322	112	326.322	0.398847
514	3.254	491.01	113	378.01	141.474	112	29.474	0.0779715
515	9.097	1018.28	113	905.277	349.252	112	237.252	0.262077
516	4.648	539.657	113	426.657	184.379	112	72.379	0.169642
517	2.606	1119.43	113	1006.43	196.42	112	84.42	0.0838809
518	4.416	1037.02	113	924.019	385.865	112	273.865	0.296385
519	3.071	525.362	113	412.362	158.432	112	46.432	0.1126
520	3.37	901.286	113	788.286	746.177	112	634.177	0.804501
521	4.632	1309.8	113	1196.8	310.728	112	198.728	0.16605
522	3.171	415.073	113	302.073	164.801	112	52.801	0.174795
523	2.208	824.714	113	711.714	178.233	112	66.233	0.0930613
524	2.241	926.333	113	813.333	363.274	112	251.274	0.308944
525	2.108	476.016	113	363.016	171.866	112	59.866	0.164913
526	2.009	1023.56	113	910.562	353.785	112	241.785	0.265534
527	7.454	803.572	113	690.572	221.065	112	109.065	0.157934
528	3.602	955.318	113	842.318	422.438	112	310.438	0.368552
529	5.146	650.497	113	537.497	230.952	112	118.952	0.221307
530	2.457	677.581	113	564.581	293.919	112	181.919	0.322219
531	4.283	1071.25	113	958.248	349.822	112	237.822	0.248184
532	9.861	973.862	113	860.862	306.498	112	194.498	0.225934
533	9.795	1026.61	113	913.614	319.983	112	207.983	0.227649
534	3.486	845.09	113	732.09	294.157	112	182.157	0.248818
535	3.934	1028.73	113	915.734	329.363	112	217.363	0.237365
536	4.848	1046.51	113	933.51	466.952	112	354.952	0.380234
537	2.507	900.377	113	787.377	389.172	112	277.172	0.352019
538	2.274	700.124	113	587.124	152.416	112	40.416	0.0688372
539	2.656	1025.08	113	912.075	407.194	112	295.194	0.323651
540	4.765	949.317	113	836.317	413.498	112	301.498	0.360507
541	3.021	822.714	113	709.714	237.429	112	125.429	0.176732
542	3.37	586	113	473	226.877	112	114.877	0.242869
543	5.08	877.297	113	764.297	264.742	112	152.742	0.199846
544	8.981	726.933	113	613.933	193.133	112	81.133	0.132153
545	3.088	546.376	113	433.376	131.258	112	19.258	0.0444372
546	4.266	704.35	113	591.35	243.634	112	131.634	0.222599
547	4.599	681.751	113	568.751	335.314	112	223.314	0.392639
548	4.748	942.269	113	829.269	518.364	112	406.364	0.490027
549	2.374	919.126	113	806.126	338.839	112	226.839	0.281394
550	2.341	439.972	113	326.972	161.461	112	49.461	0.15127
551	3.652	821.9	113	708.9	309.1	112	197.1	0.278036
552	2.042	743.65	113	630.65	230.593	112	118.593	0.188049
553	10.409	732.892	113	619.892	240.711	112	128.711	0.207635
554	3.104	832.166	113	719.166	397.567	112	285.567	0.397081
555	4.183	846.869	113	733.869	496.496	112	384.496	0.52393
556	4.266	633.121	113	520.121	195.346	112	83.346	0.160243
557	2.424	739.582	113	626.582	701.959	112	589.959	0.941551
558	3.37	765.463	113	652.463	141.31	112	29.31	0.0449221
559	7.886	671.069	113	558.069	245.619	112	133.619	0.239431
560	5.478	803.752	113	690.752	238.533	112	126.533	0.183182
561	2.573	915.852	113	802.852	248.09	112	136.09	0.169508
562	5.014	908.106	113	795.106	362.384	112	250.384	0.314906
563	6.308	839.284	113	726.284	396.187	112	284.187	0.391289
564	2.756	717.982	113	604.982	158.584	112	46.584	0.0770006
565	2.706	832.491	113	719.491	266.779	112	154.779	0.215123
566	2.108	450.134	113	337.134	147.457	112	35.457	0.105172
567	2.308	450.827	113	337.827	169.079	112	57.079	0.168959
568	3.702	804.215	113	691.215	263.067	112	151.067	0.218553
569	2.125	784.906	113	671.906	159.438	112	47.438	0.0706021
570	6.159	669.394	113	556.394	170.305	112	58.305	0.104791
571	4.35	709.664	113	596.664	238.248	112	126.248	0.21159
572	9.214	687.213	113	574.213	200.222	112	88.222	0.15364
573	6.425	834.855	113	721.855	254.863	112	142.863	0.197911
574	4.599	905.704	113	792.704	334.191	112	222.191	0.280295
575	4.3	781.015	113	668.015	168.17	112	56.17	0.0840849
576	4.698	851.908	113	738.908	256.463	112	144.463	0.195509
577	3.868	787.815	113	674.815	292.524	112	180.524	0.267516
578	2.59	680.891	113	567.891	231.551	112	119.551	0.210518
579	2.972	686.128	113	573.128	252.145	112	140.145	0.244527
580	5.03	736.264	113	623.264	390.891	112	278.891	0.447468
581	2.656	805.288	113	692.288	538.581	112	426.581	0.61619
582	3.204	783.585	113	670.585	289.295	112	177.295	0.264389
583	11.87	773.641	113	660.641	257.959	112	145.959	0.220935
584	4.466	722.283	113	609.283	276.29	112	164.29	0.269645
585	5.462	854.866	113	741.866	220.982	112	108.982	0.146903
586	5.346	822.416	113	709.416	396.05	112	284.05	0.4004
587	2.225	486.373	113	373.373	137.813	112	25.813	0.0691346
588	4.001	779.606	113	666.606	388.942	112	276.942	0.415451
589	2.391	681.868	113	568.868	304.528	112	192.528	0.338441
590	2.191	377.97	113	264.97	181.098	112	69.098	0.260777
591	2.922	665.523	113	552.523	262.903	112	150.903	0.273116
592	4.316	699.619	113	586.619	369.581	112	257.581	0.439094
593	2.49	715.513	113	602.513	227.353	112	115.353	0.191453
594	2.59	760.75	113	647.75	133.603	112	21.603	0.0333508
595	3.553	510.014	113	397.014	162.818	112	50.818	0.128001
596	4.217	694.835	113	581.835	242.945	112	130.945	0.225055
597	3.071	520.092	113	407.092	143.643	112	31.643	0.0777294
598	6.574	697.775	113	584.775	210.967	112	98.967	0.169239
599	3.171	467.314	113	354.314	228.759	112	116.759	0.329535
600	3.254	663.122	113	550.122	375.378	112	263.378	0.478763
601	2.64	565.126	113	452.126	213.969	112	101.969	0.225532
602	2.44	551.218	113	438.218	165.585	112	53.585	0.122279
603	4.366	681.806	113	568.806	249.586	112	137.586	0.241886
604	2.623	654.038	113	541.038	243.19	112	131.19	0.242478
605	2.507	713.099	113	600.099	121.874	112	9.874	0.016454
606	3.984	450.975	113	337.975	145.175	112	33.175	0.0981581
607	10.542	694.458	113	581.458	167.69	112	55.69	0.0957765
608	3.752	541.872	113	428.872	141.509	112	29.509	0.0688061
609	4.466	558.42	113	445.42	191.803	112	79.803	0.179163
610	4.433	426.648	113	313.648	132.116	112	20.116	0.0641356
611	2.59	513.59	113	400.59	144.718	112	32.718	0.0816745
612	2.49	646.86	113	533.86	160.427	112	48.427	0.090711
613	5.528	648.805	113	535.805	227.453	112	115.453	0.215476
614	2.922	519.25	113	406.25	164.597	112	52.597	0.12947
615	2.839	554.702	113	441.702	145.819	112	33.819	0.0765652
616	5.146	574.619	113	461.619	179.068	112	67.068	0.145289
617	5.512	500.858	113	387.858	177.16	112	65.16	0.168
618	2.573	560.374	113	447.374	177.019	112	65.019	0.145335
619	4.814	538.072	113	425.072	212.648	112	100.648	0.236779
620	5.445	542.015	113	429.015	178.488	112	66.488	0.154978
621	10.326	549.783	113	436.783	197.547	112	85.547	0.195857
622	2.274	472.321	113	359.321	164.036	112	52.036	0.144818
623	2.324	436.857	113	323.857	124.814	112	12.814	0.0395668
624	2.54	545.49	113	432.49	133.366	112	21.366	0.0494023
625	8.533	479.508	113	366.508	178.942	112	66.942	0.182648
626	2.606	499.497	113	386.497	227.732	112	115.732	0.299438
627	2.839	471.205	113	358.205	151.199	112	39.199	0.109432
628	3.138	473.899	113	360.899	165.434	112	53.434	0.148058
629	3.652	487.227	113	374.227	149.073	112	37.073	0.0990655
630	2.258	447.059	113	334.059	132.294	112	20.294	0.0607497
631	5.628	578.239	113	465.239	201.277	112	89.277	0.191895
632	3.287	616.247	113	503.247	214.722	112	102.722	0.204118
633	2.059	494.185	113	381.185	191.992	112	79.992	0.209851
634	2.108	493.764	113	380.764	150.173	112	38.173	0.100254
635	2.689	485.099	113	372.099	151.049	112	39.049	0.104943
636	5.96	607.49	113	494.49	225.072	112	113.072	0.228664
637	4.466	640.394	113	527.394	173.056	112	61.056	0.115769
638	2.191	496.015	113	383.015	145.735	112	33.735	0.0880775
639	2.457	483.73	113	370.73	128.439	112	16.439	0.0443422
640	3.951	576.899	113	463.899	117.441	112	5.441	0.0117288
641	3.104	694.877	113	581.877	153.118	112	41.118	0.0706644
642	2.855	519.988	113	406.988	106.738	112	0	0
643	7.57	523.524	113	410.524	133.577	112	21.577	0.0525597
644	2.457	777.318	113	664.318	190.696	112	78.696	0.118461
645	2.208	471.752	113	358.752	130.677	112	18.677	0.052061
646	4.466	700.279	113	587.279	269.602	112	157.602	0.26836
647	3.171	608.414	113	495.414	210.408	112	98.408	0.198638
648	4.051	677.832	113	564.832	141.422	112	29.422	0.0520898
649	4.931	535.421	113	422.421	178.414	112	66.414	0.157222
650	3.42	604.32	113	491.32	153.898	112	41.898	0.0852764
651	4.117	721.903	113	608.903	188.101	112	76.101	0.12498
652	2.424	684.226	113	571.226	179.979	112	67.979	0.119005
653	2.009	618.686	113	505.686	191.86	112	79.86	0.157924
654	3.121	642.819	113	529.819	153.298	112	41.298	0.0779474
655	9.297	706.327	113	593.327	181.721	112	69.721	0.117509
656	3.918	738.403	113	625.403	145.763	112	33.763	0.053986
657	2.606	675.42	113	562.42	164.777	112	52.777	0.0938391
658	2.225	721.007	113	608.007	308.575	112	196.575	0.32331
659	4.748	765.633	113	652.633	216.997	112	104.997	0.160882
660	4.698	631.76	113	518.76	123.59	112	11.59	0.0223417
661	3.768	693.819	113	580.819	191.225	112	79.225	0.136402
662	3.519	697.439	113	584.439	224.33	112	112.33	0.192201
663	3.785	700.785	113	587.785	191.939	112	79.939	0.136
664	3.121	567.511	113	454.511	148.521	112	36.521	0.0803523
665	2.125	418.547	113	305.547	125.922	112	13.922	0.0455642
666	7.155	519.814	113	406.814	133.469	112	21.469	0.0527735
667	2.009	664.264	113	551.264	405	112	293	0.531506
668	5.296	760.47	113	647.47	261.903	112	149.903	0.231521
669	4.067	730.196	113	617.196	209.086	112	97.086	0.157302
670	2.341	597.929	113	484.929	123.064	112	11.064	0.0228157
671	2.656	560.294	113	447.294	112.081	112	0.081	0.000181089
672	3.553	730.762	113	617.762	117.35	112	5.35	0.00866029
673	2.225	459.709	113	346.709	131.657	112	19.657	0.056696
674	2.54	772.124	113	659.124	275.346	112	163.346	0.247823
675	2.142	769.364	113	656.364	171.047	112	59.047	0.0899608
676	2.274	837.504	113	724.504	287.365	112	175.365	0.242048
677	5.229	901.286	113	788.286	426.092	112	314.092	0.398449
678	4.416	801.383	113	688.383	320.372	112	208.372	0.302698
679	2.872	613.006	113	500.006	129.162	112	17.162	0.0343236
680	8.367	926.966	113	813.966	344.028	112	232.028	0.285059
681	6.225	643.32	113	530.32	125.365	112	13.365	0.0252018
682	9.413	652.113	113	539.113	230.476	112	118.476	0.219761
683	5.561	718.507	113	605.507	210.69	112	98.69	0.162987
684	2.274	808.328	113	695.328	296.854	112	184.854	0.265852
685	2.922	969.795	113	856.795	248.051	112	136.051	0.158791
686	5.993	572.097	113	459.097	193.615	112	81.615	0.177773
687	2.324	531.343	113	418.343	199.029	112	87.029	0.208033
688	4.15	850.272	113	737.272	283.292	112	171.292	0.232332
689	6.491	927.113	113	814.113	269.051	112	157.051	0.192911
690	2.889	845.316	113	732.316	138.759	112	26.759	0.0365402
691	5.362	824.303	113	711.303	159.406	112	47.406	0.0666467
692	4.964	840.298	113	727.298	333.371	112	221.371	0.304375
693	3.237	792.056	113	679.056	293.754	112	181.754	0.267657
694	5.943	542.76	113	429.76	139.807	112	27.807	0.0647036
695	2.025	771.869	113	658.869	128.631	112	16.631	0.0252417
696	2.905	730.183	113	617.183	172.189	112	60.189	0.0975221
697	4.964	1013.4	113	900.405	329.411	112	217.411	0.241459
698	2.291	480.391	113	367.391	142.37	112	30.37	0.082664
699	3.055	935.793	113	822.793	443.647	112	331.647	0.403075
700	4.814	868.148	113	755.148	304.359	112	192.359	0.25473
701	2.922	701.142	113	588.142	384.239	112	272.239	0.46288
702	3.735	449.32	113	336.32	161.658	112	49.658	0.147651
703	3.37	738.507	113	625.507	321.665	112	209.665	0.335192
704	4.814	921.617	113	808.617	339.897	112	227.897	0.281836
705	2.806	591.189	113	478.189	196.893	112	84.893	0.17753
706	7.62	955.118	113	842.118	319.573	112	207.573	0.246489
707	2.009	851.595	113	738.595	323.364	112	211.364	0.28617
708	2.44	887.347	113	774.347	287.537	112	175.537	0.22669
709	2.125	528.516	113	415.516	166.188	112	54.188	0.130411
710	12.982	957.994	113	844.994	347.168	112	235.168	0.278307
711	3.586	617.463	113	504.463	190.995	112	78.995	0.156592
712	5.063	1014.77	113	901.774	318.78	112	206.78	0.229304
713	3.353	920.074	113	807.074	294.025	112	182.025	0.225537
714	2.507	882.735	113	769.735	279.689	112	167.689	0.217853
715	3.254	495.133	113	382.133	113.5	112	1.5	0.00392533
716	4.615	637.554	113	524.554	159.568	112	47.568	0.0906828
717	4.516	833.39	113	720.39	219.21	112	107.21	0.148822
718	2.025	408.27	113	295.27	120.893	112	8.893	0.0301182
719	3.32	852.945	113	739.945	125.025	112	13.025	0.0176027
720	3.768	963.48	113	850.48	484.868	112	372.868	0.438421
721	3.669	998.326	113	885.326	220.181	112	108.181	0.122193
722	3.337	872.343	113	759.343	503.512	112	391.512	0.515593
723	4.466	662.045	113	549.045	242.989	112	130.989	0.238576
724	2.108	1027.5	113	914.496	115.756	112	3.756	0.00410718
725	2.042	674.089	113	561.089	142.919	112	30.919	0.0551053
726	4.499	1045.53	113	932.531	523.657	112	411.657	0.441441
727	2.208	603.383	113	490.383	164.414	112	52.414	0.106884
728	3.021	808.489	113	695.489	127.258	112	15.258	0.0219385
729	3.486	872.8	113	759.8	286.762	112	174.762	0.230011
730	3.851	496.461	113	383.461	145.177	112	33.177	0.0865199
731	3.702	685.43	113	572.43	177.135	112	65.135	0.113787
732	2.125	757.664	113	644.664	141.586	112	29.586	0.0458937
733	3.818	853.761	113	740.761	525.222	112	413.222	0.557834
734	6.109	1003.01	113	890.014	326.826	112	214.826	0.241374
735	2.822	632.447	113	519.447	247.024	112	135.024	0.259938
736	2.972	662.061	113	549.061	171.883	112	59.883	0.109064
737	2.341	1081.37	113	968.369	650.014	112	538.014	0.555588
738	2.258	622.882	113	509.882	171.11	112	59.11	0.115929
739	2.955	753.826	113	640.826	148.466	112	36.466	0.0569047
740	2.274	544.934	113	431.934	118.358	112	6.358	0.0147198
741	2.208	961.008	113	848.008	267.571	112	155.571	0.183455
742	5.429	874.22	113	761.22	458.193	112	346.193	0.454787
743	3.005	874.569	113	761.569	211.431	112	99.431	0.130561
744	3.685	707.554	113	594.554	311.018	112	199.018	0.334735
745	2.938	915.384	113	802.384	639.819	112	527.819	0.657813
746	2.739	826	113	713	172.618	112	60.618	0.0850182
747	3.785	1067.41	113	954.412	184.636	112	72.636	0.0761055
748	5.113	852.513	113	739.513	184.737	112	72.737	0.098358
749	2.142	978.643	113	865.643	791.349	112	679.349	0.784791
750	2.523	738.842	113	625.842	292.461	112	180.461	0.288349
751	7.105	467.107	113	354.107	196.367	112	84.367	0.238253
752	3.171	789.686	113	676.686	229.901	112	117.901	0.174233
753	2.507	520.291	113	407.291	146.94	112	34.94	0.0857863
754	3.204	535.772	113	422.772	171.86	112	59.86	0.141589
755	6.242	951.508	113	838.508	314.468	112	202.468	0.241462
756	4.433	979.292	113	866.292	519.382	112	407.382	0.470259
757	3.569	1036.84	113	923.842	270.902	112	158.902	0.172001
758	2.49	778.387	113	665.387	164.613	112	52.613	0.0790713
759	5.761	973.259	113	860.259	149.256	112	37.256	0.0433079
760	2.291	727.601	113	614.601	145.725	112	33.725	0.054873
761	2.075	730.624	113	617.624	139.544	112	27.544	0.0445967
762	3.569	871.991	113	758.991	193.698	112	81.698	0.10764
763	4.748	924.262	113	811.262	326.255	112	214.255	0.264101
764	4.333	806.169	113	693.169	267.682	112	155.682	0.224595
765	3.038	981.989	113	868.989	491.459	112	379.459	0.436667
766	2.175	859.481	113	746.481	162.405	112	50.405	0.0675235
767	5.379	684.59	113	571.59	202.065	112	90.065	0.157569
768	2.706	920.123	113	807.123	322.564	112	210.564	0.260882
769	8.5	730.582	113	617.582	345.289	112	233.289	0.377746
770	8.649	751.403	113	638.403	252.906	112	140.906	0.220716
771	2.391	649.306	113	536.306	309.653	112	197.653	0.368545
772	5.777	548.618	113	435.618	160.233	112	48.233	0.110723
773	2.241	839.126	113	726.126	152.081	112	40.081	0.0551984
774	2.889	711.224	113	598.224	335.213	112	223.213	0.373126
775	4.532	789.055	113	676.055	130.678	112	18.678	0.0276279
776	4.748	732.259	113	619.259	236.787	112	124.787	0.20151
777	2.689	954.37	113	841.37	370.099	112	258.099	0.30676
778	2.756	699.994	113	586.994	593.072	112	481.072	0.819552
779	2.291	870.13	113	757.13	295.87	112	183.87	0.242851
780	8.948	1078.89	113	965.887	563.994	112	451.994	0.467957
781	9.131	822.807	113	709.807	310.836	112	198.836	0.280127
782	3.553	712.051	113	599.051	230.673	112	118.673	0.198102
783	3.005	846.867	113	733.867	327.856	112	215.856	0.294135
784	3.536	531.282	113	418.282	224.808	112	112.808	0.269694
785	5.777	435.296	113	322.296	153.02	112	41.02	0.127274
786	4.017	891.57	113	778.57	393.017	112	281.017	0.36094
787	3.536	938.094	113	825.094	287.742	112	175.742	0.212996
788	4.117	816.069	113	703.069	327.121	112	215.121	0.305974
789	6.458	840.18	113	727.18	204.059	112	92.059	0.126597
790	2.142	829.729	113	716.729	585.256	112	473.256	0.6603
791	2.274	1075.43	113	962.431	641.628	112	529.628	0.550302
792	5.711	955.881	113	842.881	309.788	112	197.788	0.234657
793	3.553	892.687	113	779.687	472.014	112	360.014	0.461742
794	2.474	833.725	113	720.725	436.584	112	324.584	0.450358
795	11.604	960.785	113	847.785	242.465	112	130.465	0.153889
796	6.508	917.186	113	804.186	367.074	112	255.074	0.317183
797	2.108	667.583	113	554.583	222.22	112	110.22	0.198744
798	2.855	701.692	113	588.692	278.291	112	166.291	0.282475
799	5.727	1050.62	113	937.617	276.539	112	164.539	0.175486
800	5.03	728.31	113	615.31	200.05	112	88.05	0.143099
801	4.35	1001.57	113	888.573	503.42	112	391.42	0.440504
802	3.453	806.091	113	693.091	258.062	112	146.062	0.21074
803	9.977	810.759	113	697.759	284.612	112	172.612	0.247381
804	2.125	798.031	113	685.031	257.008	112	145.008	0.211681
805	2.689	491.722	113	378.722	134.877	112	22.877	0.0604058
806	6.425	755.63	113	642.63	238.742	112	126.742	0.197224
807	2.723	947.878	113	834.878	173.134	112	61.134	0.0732251
808	3.934	653.207	113	540.207	162.245	112	50.245	0.0930106
809	2.855	859.343	113	746.343	561.11	112	449.11	0.601747
810	2.341	788.397	113	675.397	204.014	112	92.014	0.136237
811	2.789	419.625	113	306.625	133.923	112	21.923	0.0714978
812	2.905	549.657	113	436.657	234.337	112	122.337	0.280167
813	5.528	785.324	113	672.324	435.52	112	323.52	0.481197
814	3.27	900.213	113	787.213	375.183	112	263.183	0.334322
815	2.125	728.094	113	615.094	266.32	112	154.32	0.250888
816	3.104	699.69	113	586.69	121.877	112	9.877	0.0168351
817	7.238	872.339	113	759.339	398.294	112	286.294	0.377031
818	3.204	773.798	113	660.798	386.808	112	274.808	0.415873
819	4.599	944.578	113	831.578	379.202	112	267.202	0.321319
820	2.673	580.168	113	467.168	341.944	112	229.944	0.492208
821	2.772	446.353	113	333.353	154.844	112	42.844	0.128524
822	2.158	537.246	113	424.246	149.231	112	37.231	0.087758
823	8.035	880.998	113	767.998	273.008	112	161.008	0.209646
824	2.64	678.05	113	565.05	272.623	112	160.623	0.284263
825	4.466	490.822	113	377.822	121.517	112	9.517	0.0251891
826	2.158	549.946	113	436.946	118.508	112	6.508	0.0148943
827	2.142	820.829	113	707.829	207.682	112	95.682	0.135177
828	8.018	636.872	113	523.872	199.712	112	87.712	0.16743
829	2.407	487.834	113	374.834	139.959	112	27.959	0.0745904
830	3.254	831.612	113	718.612	336.092	112	224.092	0.31184
831	11.637	921.799	113	808.799	341.451	112	229.451	0.283693
832	3.353	594.837	113	481.837	175.837	112	63.837	0.132487
833	2.357	544.93	113	431.93	143.225	112	31.225	0.0722918
834	2.025	527.541	113	414.541	226.803	112	114.803	0.27694
835	3.802	496.668	113	383.668	148.192	112	36.192	0.0943316
836	3.287	703.495	113	590.495	165.96	112	53.96	0.091381
837	5.229	595.543	113	482.543	216.99	112	104.99	0.217576
838	2.357	589.662	113	476.662	180.43	112	68.43	0.143561
839	4.765	749.53	113	636.53	395.174	112	283.174	0.444871
840	2.374	820.671	113	707.671	354.594	112	242.594	0.342806
841	6.79	787.455	113	674.455	317.21	112	205.21	0.30426
842	2.009	731.446	113	618.446	234.818	112	122.818	0.198591
843	5.611	584.95	113	471.95	244.87	112	132.87	0.281534
844	2.523	637.355	113	524.355	176.046	112	64.046	0.122142
845	2.092	482.659	113	369.659	188.667	112	76.667	0.207399
846	4.466	668.584	113	555.584	233.539	112	121.539	0.218759
847	3.519	460.42	113	347.42	145.297	112	33.297	0.0958408
848	2.839	499.982	113	386.982	136.988	112	24.988	0.0645715
849	2.241	545.259	113	432.259	184.467	112	72.467	0.167647
850	2.988	507.956	113	394.956	386.072	112	274.072	0.69393
851	7.006	580.628	113	467.628	174.979	112	62.979	0.134678
852	2.009	627.347	113	514.347	311.843	112	199.843	0.388537
853	7.371	641.727	113	528.727	178.727	112	66.727	0.126203
854	5.877	662.311	113	549.311	244.825	112	132.825	0.241803
855	3.237	608.164	113	495.164	179.692	112	67.692	0.136706
856	2.44	437.449	113	324.449	150.082	112	38.082	0.117374
857	5.595	741.249	113	628.249	209.973	112	97.973	0.155946
858	3.021	646.198	113	533.198	181.319	112	69.319	0.130006
859	5.661	433.525	113	320.525	157.915	112	45.915	0.143249
860	6.375	842.951	113	729.951	461.841	112	349.841	0.479266
861	2.457	628.108	113	515.108	245.568	112	133.568	0.259301
862	7.57	534.656	113	421.656	165.274	112	53.274	0.126345
863	2.208	442.94	113	329.94	222.857	112	110.857	0.335991
864	3.802	682.852	113	569.852	184.838	112	72.838	0.127819
865	2.988	605.733	113	492.733	249.572	112	137.572	0.279202
866	3.885	467.282	113	354.282	206.154	112	94.154	0.26576
867	8.799	629.596	113	516.596	194.085	112	82.085	0.158896
868	2.357	467.423	113	354.423	128.873	112	16.873	0.047607
869	8.799	718.775	113	605.775	325.915	112	213.915	0.353126
870	2.972	478.547	113	365.547	194.894	112	82.894	0.226767
871	7.255	589.86	113	476.86	200.247	112	88.247	0.185059
872	3.553	610.107	113	497.107	238.893	112	126.893	0.255263
873	2.756	559.446	113	446.446	185.036	112	73.036	0.163594
874	4.416	486.154	113	373.154	202.846	112	90.846	0.243454
875	3.951	601.429	113	488.429	273.45	112	161.45	0.33055
876	2.889	474.799	113	361.799	303.034	112	191.034	0.528011
877	2.507	626.894	113	513.894	200.106	112	88.106	0.171448
878	3.735	597.409	113	484.409	331.04	112	219.04	0.45218
879	2.208	552.331	113	439.331	135.173	112	23.173	0.0527461
880	3.038	529.344	113	416.344	183.672	112	71.672	0.172146
881	5.346	524.91	113	411.91	223.835	112	111.835	0.271503
882	2.092	375.389	113	262.389	124.825	112	12.825	0.0488778
883	3.918	464.153	113	351.153	176.068	112	64.068	0.18245
884	4.35	469.859	113	356.859	142.332	112	30.332	0.0849972
885	2.407	370.421	113	257.421	130.717	112	18.717	0.0727097
886	3.42	559.942	113	446.942	180.587	112	68.587	0.153458
887	2.922	553.767	113	440.767	226.04	112	114.04	0.258731
888	2.656	415.606	113	302.606	141.969	112	29.969	0.0990364
889	2.557	446.123	113	333.123	166.065	112	54.065	0.162297
890	4.316	502.719	113	389.719	161.862	112	49.862	0.127943
891	3.221	532.979	113	419.979	199.804	112	87.804	0.209068
892	2.391	506.389	113	393.389	169.979	112	57.979	0.147383
893	3.187	629.865	113	516.865	172.594	112	60.594	0.117234
894	2.142	557.698	113	444.698	168.806	112	56.806	0.127741
895	6.242	587.561	113	474.561	218.157	112	106.157	0.223695
896	2.739	522.315	113	409.315	159.848	112	47.848	0.116898
897	6.342	555.738	113	442.738	137.298	112	25.298	0.0571399
898	2.457	798.034	113	685.034	109.635	112	0	0
899	2.673	555.634	113	442.634	168.348	112	56.348	0.127302
900	3.553	606.252	113	493.252	163.439	112	51.439	0.104285
901	3.802	558.301	113	445.301	145.79	112	33.79	0.0758813
902	2.075	495.248	113	382.248	237.624	112	125.624	0.328645
903	3.785	548.741	113	435.741	169.877	112	57.877	0.132824
904	3.503	600.578	113	487.578	199.147	112	87.147	0.178734
905	2.108	602.717	113	489.717	137.921	112	25.921	0.0529306
906	3.768	654.286	113	541.286	189.608	112	77.608	0.143377
907	2.656	537.938	113	424.938	163.275	112	51.275	0.120665
908	7.155	628.647	113	515.647	208.594	112	96.594	0.187326
909	4.017	558.058	113	445.058	161.996	112	49.996	0.112336
910	2.258	576.066	113	463.066	184.434	112	72.434	0.156423
911	2.042	656.081	113	543.081	248.659	112	136.659	0.251636
912	3.934	656.937	113	543.937	299.544	112	187.544	0.34479
913	2.739	705.582	113	592.582	157.618	112	45.618	0.0769818
914	2.158	468.523	113	355.523	130.623	112	18.623	0.052382
915	3.021	656.137	113	543.137	176.709	112	64.709	0.119139
916	2.507	834.02	113	721.02	171.841	112	59.841	0.0829949
917	3.403	478.341	113	365.341	124.127	112	12.127	0.0331936
918	2.855	623.692	113	510.692	148.413	112	36.413	0.0713013
919	2.988	690.339	113	577.339	234.583	112	122.583	0.212324
920	2.291	628.196	113	515.196	240.116	112	128.116	0.248674
921	3.27	508.183	113	395.183	141.695	112	29.695	0.0751424
922	5.81	743.766	113	630.766	294.603	112	182.603	0.289494
923	2.507	592.98	113	479.98	179.821	112	67.821	0.1413
924	7.055	803.861	113	690.861	293.129	112	181.129	0.262179
925	2.059	560.952	113	447.952	132.105	112	20.105	0.044882
926	7.603	741.317	113	628.317	309.454	112	197.454	0.314259
927	6.225	861.88	113	748.88	217.301	112	105.301	0.140611
928	7.72	773.219	113	660.219	226.492	112	114.492	0.173415
929	3.436	625.812	113	512.812	165.372	112	53.372	0.104077
930	3.353	758.53	113	645.53	201.416	112	89.416	0.138516
931	4.433	790.131	113	677.131	257.936	112	145.936	0.215521
932	5.146	767.077	113	654.077	279.729	112	167.729	0.256436
933	3.553	555.262	113	442.262	159.439	112	47.439	0.107264
934	2.009	627.587	113	514.587	198.14	112	86.14	0.167396
935	3.768	824.608	113	711.608	278.211	112	166.211	0.233571
936	2.374	627.112	113	514.112	166.671	112	54.671	0.106341
937	4.565	578.498	113	465.498	151.025	112	39.025	0.0838349
938	2.158	921.746	113	808.746	194.477	112	82.477	0.101981
939	6.391	690.46	113	577.46	178.174	112	66.174	0.114595
940	3.652	855.882	113	742.882	238.073	112	126.073	0.169708
941	5.196	816.767	113	703.767	211.55	112	99.55	0.141453
942	2.308	756.151	113	643.151	202.309	112	90.309	0.140416
943	2.573	819.594	113	706.594	369.716	112	257.716	0.36473
944	3.071	890.184	113	777.184	211.973	112	99.973	0.128635
945	2.291	446.746	113	333.746	133.609	112	21.609	0.0647468
946	2.142	634.039	113	521.039	112.705	112	0.705	0.00135307
947	3.287	557.106	113	444.106	170.99	112	58.99	0.132829
948	8.018	809.921	113	696.921	173.302	112	61.302	0.0879612
949	5.561	645.039	113	532.039	266.866	112	154.866	0.29108
950	2.374	567.154	113	454.154	118.119	112	6.119	0.0134734
951	3.32	722.145	113	609.145	126.525	112	14.525	0.0238449
952	3.785	755.785	113	642.785	355.351	112	243.351	0.378588
953	5.96	868.638	113	755.638	213.568	112	101.568	0.134414
954	6.242	901.418	113	788.418	473.947	112	361.947	0.45908
955	4.433	794.086	113	681.086	213.584	112	101.584	0.14915
956	2.059	618.774	113	505.774	180.202	112	68.202	0.134847
957	2.291	569.312	113	456.312	177.377	112	65.377	0.143273
958	5.296	750.489	113	637.489	164.408	112	52.408	0.08221
959	5.777	570.747	113	457.747	159.839	112	47.839	0.10451
960	6.076	841.311	113	728.311	239.216	112	127.216	0.174673
961	6.176	701.68	113	588.68	222.226	112	110.226	0.187243
962	2.258	391.147	113	278.147	131.618	112	19.618	0.0705311
963	4.549	833.135	113	720.135	178.248	112	66.248	0.0919939
964	2.457	592.872	113	479.872	132.905	112	20.905	0.0435637
965	3.287	849.359	113	736.359	390.823	112	278.823	0.378651
966	4.532	960.337	113	847.337	405.612	112	293.612	0.346511
967	7.238	883.122	113	770.122	308.727	112	196.727	0.255449
968	14.775	865.789	113	752.789	319.882	112	207.882	0.276149
969	4.383	783.723	113	670.723	403.523	112	291.523	0.43464
970	2.606	622.809	113	509.809	171.134	112	59.134	0.115992
971	7.371	926.579	113	813.579	322.293	112	210.293	0.258479
972	2.025	973.959	113	860.959	204.795	112	92.795	0.107781
973	5.445	767.79	113	654.79	168.375	112	56.375	0.0860963
974	3.47	789.919	113	676.919	505.431	112	393.431	0.581208
975	5.644	938.3	113	825.3	456.938	112	344.938	0.417955
976	3.237	548.687	113	435.687	218.323	112	106.323	0.244035
977	7.62	891.861	113	778.861	244.135	112	132.135	0.169652
978	4.582	1004.2	113	891.199	351.797	112	239.797	0.269072
979	2.756	731.102	113	618.102	228.398	112	116.398	0.188315
980	3.519	915.033	113	802.033	377.514	112	265.514	0.331051
981	3.503	807.967	113	694.967	338.043	112	226.043	0.325257
982	3.038	751.852	113	638.852	207.765	112	95.765	0.149902
983	3.47	475.249	113	362.249	149.904	112	37.904	0.104635
984	3.337	844.776	113	731.776	181.323	112	69.323	0.0947325
985	4.798	600.394	113	487.394	195.799	112	83.799	0.171933
986	5.976	876.747	113	763.747	271.175	112	159.175	0.208413
987	4.698	821.83	113	708.83	288.198	112	176.198	0.248576
988	3.436	698.812	113	585.812	154.502	112	42.502	0.0725523
989	2.523	718.737	113	605.737	181.645	112	69.645	0.114976
990	3.519	721.009	113	608.009	140.203	112	28.203	0.0463858
991	2.839	736.374	113	623.374	311.205	112	199.205	0.319559
992	5.113	854.377	113	741.377	288.951	112	176.951	0.238679
993	6.69	692.826	113	579.826	231.087	112	119.087	0.205384
994	4.001	1067.78	113	954.78	512.568	112	400.568	0.41954
995	3.536	542.577	113	429.577	175.437	112	63.437	0.147673
996	2.009	803.661	113	690.661	399.05	112	287.05	0.415616
997	3.42	984.738	113	871.738	285.311	112	173.311	0.198811
998	2.905	639.069	113	526.069	150.446	112	38.446	0.0730817
999	4.35	812.809	113	699.809	253.824	112	141.824	0.202661
1000	2.042	713.138	113	600.138	261.065	112	149.065	0.248385
1001	5.014	1004.72	113	891.715	284.563	112	172.563	0.193518
1002	2.557	717.74	113	604.74	262.558	112	150.558	0.248963
1003	8.085	833.825	113	720.825	735.158	112	623.158	0.864507
1004	4.217	507.441	113	394.441	180.087	112	68.087	0.172616
1005	3.104	610.209	113	497.209	150.909	112	38.909	0.0782548
1006	9.562	833.844	113	720.844	307.833	112	195.833	0.271672
1007	2.391	911.882	113	798.882	348.917	112	236.917	0.296561
1008	2.324	896.543	113	783.543	256.643	112	144.643	0.184601
1009	6.391	899.049	113	786.049	232.322	112	120.322	0.153072
1010	6.524	982.997	113	869.997	292.445	112	180.445	0.207409
1011	2.772	471.509	113	358.509	237.096	112	125.096	0.348934
1012	5.661	728.938	113	615.938	324.592	112	212.592	0.345152
1013	3.221	971.495	113	858.495	233.082	112	121.082	0.14104
1014	5.263	1051.71	113	938.707	163.107	112	51.107	0.054444
1015	3.187	502.865	113	389.865	204.286	112	92.286	0.236713
1016	4.648	511.089	113	398.089	138.996	112	26.996	0.067814
1017	2.507	711.358	113	598.358	122.132	112	10.132	0.016933
1018	4.283	797.523	113	684.523	138.779	112	26.779	0.0391207
1019	2.507	503.02	113	390.02	159.96	112	47.96	0.122968
1020	4.383	928.538	113	815.538	297.822	112	185.822	0.227852
1021	3.968	803.377	113	690.377	420.862	112	308.862	0.447382
1022	6.873	624.121	113	511.121	279.396	112	167.396	0.327508
1023	5.113	867.399	113	754.399	219.506	112	107.506	0.142505
1024	2.208	795.511	113	682.511	120.827	112	8.827	0.0129331
1025	2.208	919.744	113	806.744	660.406	112	548.406	0.679777
1026	10.376	871.882	113	758.882	183.374	112	71.374	0.0940515
1027	4.017	808.661	113	695.661	484.248	112	372.248	0.5351
1028	3.868	521.227	113	408.227	180.112	112	68.112	0.166848
1029	5.86	467.292	113	354.292	150.042	112	38.042	0.107375
1030	2.706	920.564	113	807.564	395.184	112	283.184	0.350664
1031	3.785	739.548	113	626.548	266.066	112	154.066	0.245897
1032	11.92	590.036	113	477.036	228.453	112	116.453	0.244118
1033	2.341	530.617	113	417.617	160.638	112	48.638	0.116466
1034	3.088	573.172	113	460.172	169.946	112	57.946	0.125922
1035	2.723	482.476	113	369.476	152.03	112	40.03	0.108343
1036	5.91	715.534	113	602.534	161.39	112	49.39	0.0819705
1037	3.519	918.892	113	805.892	323.873	112	211.873	0.262905
1038	2.142	470.093	113	357.093	170.767	112	58.767	0.164571
1039	17.863	924.973	113	811.973	441.073	112	329.073	0.405276
1040	3.27	825.99	113	712.99	143.883	112	31.883	0.0447173
1041	3.586	784.667	113	671.667	238.648	112	126.648	0.188558
1042	6.624	859.068	113	746.068	289.556	112	177.556	0.237989
1043	2.889	1016.62	113	903.621	150.264	112	38.264	0.0423452
1044	3.652	949.805	113	836.805	302.355	112	190.355	0.227478
1045	2.391	748.653	113	635.653	480.771	112	368.771	0.580145
1046	10.309	982.095	113	869.095	327.605	112	215.605	0.24808
1047	26.678	969.584	113	856.584	372.895	112	260.895	0.304576
1048	2.042	701.447	113	588.447	252.967	112	140.967	0.239558
1049	2.64	500.346	113	387.346	119.572	112	7.572	0.0195484
1050	3.785	929.952	113	816.952	278.088	112	166.088	0.203302
1051	5.445	900.04	113	787.04	263.823	112	151.823	0.192904
1052	5.462	946.924	113	833.924	265.334	112	153.334	0.18387
1053	3.586	949.801	113	836.801	417.13	112	305.13	0.364639
1054	2.191	676.545	113	563.545	148.803	112	36.803	0.0653062
1055	4.947	887.997	113	774.997	279.628	112	167.628	0.216295
1056	3.685	474.356	113	361.356	147.239	112	35.239	0.0975188
1057	2.158	516.338	113	403.338	133.831	112	21.831	0.0541258
1058	2.54	609.895	113	496.895	159.993	112	47.993	0.0965858
1059	8.765	796.79	113	683.79	216.812	112	104.812	0.153281
1060	5.412	921.39	113	808.39	478.209	112	366.209	0.45301
1061	7.205	959.793	113	846.793	465.173	112	353.173	0.417071
1062	6.84	757.988	113	644.988	219.301	112	107.301	0.166361
1063	2.623	722.424	113	609.424	243.171	112	131.171	0.215238
1064	3.055	665.114	113	552.114	123.12	112	11.12	0.0201408
1065	3.918	812.479	113	699.479	303.072	112	191.072	0.273163
1066	2.291	420.609	113	307.609	140.029	112	28.029	0.0911189
1067	2.905	634.189	113	521.189	256.669	112	144.669	0.277575
1068	6.757	783.467	113	670.467	293.673	112	181.673	0.270965
1069	4.748	556.486	113	443.486	232.14	112	120.14	0.270899
1070	3.337	799.657	113	686.657	242.612	112	130.612	0.190214
1071	3.021	781.445	113	668.445	218.016	112	106.016	0.158601
1072	11.272	646.339	113	533.339	217.28	112	105.28	0.197398
1073	3.37	817.68	113	704.68	263.404	112	151.404	0.214855
1074	3.47	893.316	113	780.316	245.699	112	133.699	0.17134
1075	11.471	797.232	113	684.232	183.246	112	71.246	0.104126
1076	4.433	891.064	113	778.064	588.082	112	476.082	0.61188
1077	3.204	500.14	113	387.14	229.311	112	117.311	0.30302
1078	2.673	838.901	113	725.901	212.422	112	100.422	0.138341
1079	3.353	622.792	113	509.792	232.99	112	120.99	0.237332
1080	4.266	943.486	113	830.486	647.914	112	535.914	0.645302
1081	4.217	802.362	113	689.362	276.425	112	164.425	0.238518
1082	2.756	478.958	113	365.958	174.886	112	62.886	0.171839
1083	2.623	708.93	113	595.93	162.399	112	50.399	0.084572
1084	6.607	822.161	113	709.161	262.289	112	150.289	0.211925
1085	4.698	810.025	113	697.025	439.661	112	327.661	0.470085
1086	3.337	899.632	113	786.632	253.463	112	141.463	0.179834
1087	5.362	507.18	113	394.18	148.789	112	36.789	0.0933305
1088	4.964	1067.82	113	954.819	283.699	112	171.699	0.179824
1089	4.997	1023.11	113	910.106	630.953	112	518.953	0.570212
1090	2.125	418.805	113	305.805	141.273	112	29.273	0.0957244
1091	6.043	585.179	113	472.179	208.676	112	96.676	0.204744
1092	4.449	968.5	113	855.5	235.687	112	123.687	0.144579
1093	8.417	822.039	113	709.039	346.55	112	234.55	0.3308
1094	2.64	665.862	113	552.862	172.547	112	60.547	0.109516
1095	7.736	851.06	113	738.06	541.758	112	429.758	0.582281
1096	5.893	757.141	113	644.141	183.011	112	71.011	0.110241
1097	3.768	730.784	113	617.784	342.145	112	230.145	0.372533
1098	9.479	876.475	113	763.475	323.424	112	211.424	0.276923
1099	3.835	760.68	113	647.68	189.225	112	77.225	0.119233
1100	5.694	733.612	113	620.612	228.399	112	116.399	0.187555
1101	4.051	455.385	113	342.385	148.594	112	36.594	0.10688
1102	4.997	694.542	113	581.542	282.425	112	170.425	0.293057
1103	2.64	469.245	113	356.245	175.717	112	63.717	0.178857
1104	3.37	568.325	113	455.325	181.163	112	69.163	0.151898
1105	11.04	860.168	113	747.168	267.259	112	155.259	0.207797
1106	2.623	586.627	113	473.627	187.854	112	75.854	0.160156
1107	2.042	586.333	113	473.333	125.033	112	13.033	0.0275345
1108	9.629	683.038	113	570.038	382.79	112	270.79	0.475039
1109	7.67	812.981	113	699.981	226.468	112	114.468	0.16353
1110	7.852	663.353	113	550.353	276.41	112	164.41	0.298736
1111	2.49	551.887	113	438.887	319.34	112	207.34	0.472422
1112	4.433	743.888	113	630.888	223.022	112	111.022	0.175977
1113	3.37	599.089	113	486.089	219.276	112	107.276	0.220692
1114	2.142	692.938	113	579.938	166.357	112	54.357	0.093729
1115	5.113	652.435	113	539.435	272.026	112	160.026	0.296655
1116	3.619	999.482	113	886.482	490.087	112	378.087	0.426503
1117	4.233	438.365	113	325.365	142.278	112	30.278	0.0930586
1118	12.501	641.964	113	528.964	279.137	112	167.137	0.31597
1119	2.407	623.221	113	510.221	209.476	112	97.476	0.191047
1120	11.106	759.233	113	646.233	313.988	112	201.988	0.312562
1121	16.85	810.414	113	697.414	219.526	112	107.526	0.154178
1122	2.308	735.964	113	622.964	163.281	112	51.281	0.0823178
1123	8.998	502.803	113	389.803	155.74	112	43.74	0.112211
1124	2.158	698.385	113	585.385	361.923	112	249.923	0.426938
1125	4.183	661.139	113	548.139	345.508	112	233.508	0.426001
1126	3.436	693.348	113	580.348	121.203	112	9.203	0.0158577
1127	8.699	509.656	113	396.656	195.855	112	83.855	0.211405
1128	2.158	556.615	113	443.615	171.877	112	59.877	0.134975
1129	2.108	651.252	113	538.252	173.205	112	61.205	0.113711
1130	2.806	423.083	113	310.083	153.041	112	41.041	0.132355
1131	2.125	620.078	113	507.078	271.555	112	159.555	0.314656
1132	2.806	455.604	113	342.604	147.408	112	35.408	0.10335
1133	7.686	610.359	113	497.359	177.46	112	65.46	0.131615
1134	4.001	503.996	113	390.996	202.237	112	90.237	0.230788
1135	4.914	624.355	113	511.355	190.639	112	78.639	0.153786
1136	3.453	533.351	113	420.351	177.433	112	65.433	0.155663
1137	4.914	428.193	113	315.193	145.314	112	33.314	0.105694
1138	2.507	649.768	113	536.768	211.159	112	99.159	0.184733
1139	3.254	442.01	113	329.01	175.199	112	63.199	0.192088
1140	5.014	593.351	113	480.351	175.219	112	63.219	0.13161
1141	2.54	500.196	113	387.196	136.098	112	24.098	0.0622372
1142	2.557	475.597	113	362.597	133.662	112	21.662	0.0597413
1143	2.324	464.15	113	351.15	128.486	112	16.486	0.0469486
1144	2.374	369	113	256	146.077	112	34.077	0.133113
1145	6.375	469.716	113	356.716	184.005	112	72.005	0.201855
1146	2.258	412.618	113	299.618	131.772	112	19.772	0.0659907
1147	3.752	624.23	113	511.23	234.27	112	122.27	0.239168
1148	2.308	542.36	113	429.36	173.245	112	61.245	0.142643
1149	2.54	487.503	113	374.503	145.111	112	33.111	0.0884132
1150	5.429	612.991	113	499.991	179.716	112	67.716	0.135434
1151	2.142	369.31	113	256.31	134.186	112	22.186	0.0865592
1152	2.059	480.129	113	367.129	189.944	112	77.944	0.212307
1153	3.984	492.033	113	379.033	199.467	112	87.467	0.230764
1154	3.752	540.195	113	427.195	156.518	112	44.518	0.10421
1155	2.241	486.741	113	373.741	141.615	112	29.615	0.0792394
1156	3.586	523.676	113	410.676	172.19	112	60.19	0.146563
1157	2.822	456.547	113	343.547	120.759	112	8.759	0.0254958
1158	3.569	512.098	113	399.098	143.33	112	31.33	0.078502
1159	2.972	458.263	113	345.263	144.14	112	32.14	0.0930885
1160	2.042	491.236	113	378.236	166.309	112	54.309	0.143585
1161	2.723	487.189	113	374.189	186.909	112	74.909	0.20019
1162	2.009	529.488	113	416.488	108.736	112	0	0
1163	4.731	569.042	113	456.042	197.291	112	85.291	0.187024
1164	2.009	197.242	101	96.242	117.375	111	6.375	0.0662393
1165	2.026	190.107	101	89.107	145.099	111	34.099	0.382675
1166	2.042	199.008	101	98.008	144.852	111	33.852	0.3454
1167	2.059	167.927	101	66.927	116.919	111	5.919	0.0884396
1168	2.059	195.984	101	94.984	127.26	111	16.26	0.171187
1169	2.076	160.048	101	59.048	116.597	111	5.597	0.0947873
1170	2.076	167.185	101	66.185	130.661	111	19.661	0.297061
1171	2.093	212.352	101	111.352	129.144	111	18.144	0.162943
1172	2.109	194.913	101	93.913	169.008	111	58.008	0.617678
1173	2.109	182.706	101	81.706	144.476	111	33.476	0.409713
1174	2.143	195.516	101	94.516	119.562	111	8.562	0.0905878
1175	2.159	188.829	101	87.829	117.566	111	6.566	0.0747589
1176	2.159	192.822	101	91.822	130.597	111	19.597	0.213424
1177	2.226	205.955	101	104.955	173.331	111	62.331	0.593883
1178	2.226	205.278	101	104.278	126.752	111	15.752	0.151058
1179	2.277	169.36	101	68.36	114.956	111	3.956	0.0578701
1180	2.327	187.849	101	86.849	137.043	111	26.043	0.299865
1181	2.344	190.871	101	89.871	118.407	111	7.407	0.0824181
1182	2.377	194.035	101	93.035	132.444	111	21.444	0.230494
1183	2.411	182.16	101	81.16	126.736	111	15.736	0.193889
1184	2.427	182.152	101	81.152	217.931	111	106.931	1.31766
1185	2.427	187.669	101	86.669	134.138	111	23.138	0.26697
1186	2.478	185.5	101	84.5	128.635	111	17.635	0.208698
1187	2.545	195.132	101	94.132	131.125	111	20.125	0.213796
1188	2.611	194.429	101	93.429	139.032	111	28.032	0.300035
1189	2.645	177.949	101	76.949	129.741	111	18.741	0.243551
1190	2.695	197.938	101	96.938	123.584	111	12.584	0.129815
1191	2.729	196.362	101	95.362	171.172	111	60.172	0.630985
1192	2.762	208.364	101	107.364	144.764	111	33.764	0.314482
1193	2.779	200	101	99	112.548	111	1.548	0.0156364
1194	2.796	186.988	101	85.988	119.305	111	8.305	0.0965832
1195	2.812	195.988	101	94.988	145.994	111	34.994	0.368404
1196	2.812	194.226	101	93.226	115.976	111	4.976	0.0533757
1197	2.896	212.751	101	111.751	117.647	111	6.647	0.0594805
1198	2.93	179.88	101	78.88	119.846	111	8.846	0.112145
1199	2.963	197.876	101	96.876	124.503	111	13.503	0.139384
1200	2.963	197.689	101	96.689	125.277	111	14.277	0.147659
1201	3.013	202.356	101	101.356	197.711	111	86.711	0.855509
1202	3.047	207.434	101	106.434	124.346	111	13.346	0.125392
1203	3.063	211.596	101	110.596	120.973	111	9.973	0.0901751
1204	3.08	179.38	101	78.38	122.12	111	11.12	0.141873
1205	3.097	193.135	101	92.135	123.114	111	12.114	0.131481
1206	3.231	185.425	101	84.425	122.684	111	11.684	0.138395
1207	3.231	185.798	101	84.798	164.383	111	53.383	0.629531
1208	3.264	174.221	101	73.221	142.097	111	31.097	0.424701
1209	3.281	194.918	101	93.918	118.745	111	7.745	0.0824656
1210	3.382	199.391	101	98.391	138.297	111	27.297	0.277434
1211	3.382	179.46	101	78.46	124.698	111	13.698	0.174586
1212	3.382	173.901	101	72.901	132.802	111	21.802	0.299063
1213	3.398	189.675	101	88.675	143.236	111	32.236	0.36353
1214	3.398	199.163	101	98.163	127.251	111	16.251	0.165551
1215	3.482	195.149	101	94.149	111.038	111	0.038	0.000403616
1216	3.499	174.641	101	73.641	126.211	111	15.211	0.206556
1217	3.515	191.548	101	90.548	131.886	111	20.886	0.230662
1218	3.532	209.858	101	108.858	151.024	111	40.024	0.367672
1219	3.549	200.882	101	99.882	131.896	111	20.896	0.209207
1220	3.633	196.986	101	95.986	157.055	111	46.055	0.47981
1221	3.683	197.759	101	96.759	134.227	111	23.227	0.24005
1222	3.767	204.382	101	103.382	146.64	111	35.64	0.344741
1223	3.783	208.358	101	107.358	129.23	111	18.23	0.169806
1224	3.85	213.3	101	112.3	144.13	111	33.13	0.295013
1225	3.884	200.625	101	99.625	168.983	111	57.983	0.582013
1226	3.884	177.573	101	76.573	127.897	111	16.897	0.220665
1227	4.051	215.459	101	114.459	117.988	111	6.988	0.0610524
1228	4.068	209.881	101	108.881	109.757	111	0	0
1229	4.085	204.971	101	103.971	137.496	111	26.496	0.25484
1230	4.101	224.6	101	123.6	114.457	111	3.457	0.0279693
1231	4.185	197.748	101	96.748	124.032	111	13.032	0.1347
1232	4.202	202.936	101	101.936	175.566	111	64.566	0.633397
1233	4.336	206.305	101	105.305	139.587	111	28.587	0.271469
1234	4.47	201.288	101	100.288	179.288	111	68.288	0.680919
1235	4.486	203.466	101	102.466	168.448	111	57.448	0.560654
1236	4.587	178.062	101	77.062	125.204	111	14.204	0.184319
1237	4.704	203.103	101	102.103	169.416	111	58.416	0.572128
1238	4.721	205.702	101	104.702	139.418	111	28.418	0.271418
1239	4.721	210.004	101	109.004	140.429	111	29.429	0.269981
1240	4.771	192.688	101	91.688	118.337	111	7.337	0.0800214
1241	4.804	182.463	101	81.463	157.31	111	46.31	0.568479
1242	5.156	198.795	101	97.795	149.724	111	38.724	0.395971
1243	5.24	201.169	101	100.169	134.917	111	23.917	0.238766
1244	5.457	204.291	101	103.291	125.209	111	14.209	0.137563
1245	5.524	207.93	101	106.93	132.436	111	21.436	0.200468
1246	5.608	202.257	101	101.257	118.418	111	7.418	0.0732591
1247	6.11	192.614	101	91.614	119.784	111	8.784	0.0958805
1248	6.194	200.786	101	99.786	131.478	111	20.478	0.205219
1249	6.361	198.355	101	97.355	137.134	111	26.134	0.26844
1250	6.395	207.864	101	106.864	167.178	111	56.178	0.525696
1251	6.763	207.441	101	106.441	136.99	111	25.99	0.244173
1252	6.763	208.156	101	107.156	119.092	111	8.092	0.0755161
1253	7.249	202.993	101	101.993	136.298	111	25.298	0.248037
1254	7.801	212.783	101	111.783	141.069	111	30.069	0.268994
1255	9.14	197.473	101	96.473	142.02	111	31.02	0.321541
1256	9.174	202.224	101	101.224	122.469	111	11.469	0.113303
1257	10.279	181.565	101	80.565	115.936	111	4.936	0.0612673
1258	12.204	212.063	101	111.063	156.543	111	45.543	0.410065
1259	14.983	209.143	101	108.143	125.631	111	14.631	0.135293
1260	26.734	207.142	101	106.142	123.932	111	12.932	0.121837

## Sheet: TPX2 + gTuRC
Microtubule	Area (um^2)	Mean TB intensity	Alexa568 background intensity	Mean minus background	Mean gTuRC intensity	Alexa647 background intensity	Mean minus background	gTuRC/TB intensity
1	2.042	610.488	115	495.488	175.927	111	64.927	0.131036
2	2.689	436.346	115	321.346	156.142	111	45.142	0.140478
3	2.241	501.311	115	386.311	160.859	111	49.859	0.129064
4	2.689	447.13	115	332.13	150.074	111	39.074	0.117647
5	2.673	596.317	115	481.317	228.292	111	117.292	0.24369
6	5.528	531.832	115	416.832	210.309	111	99.309	0.238247
7	2.191	650.811	115	535.811	140.083	111	29.083	0.0542785
8	5.229	490.848	115	375.848	162.21	111	51.21	0.136252
9	5.312	630.294	115	515.294	261.184	111	150.184	0.291453
10	2.457	400.318	115	285.318	146.77	111	35.77	0.125369
11	4.98	642.73	115	527.73	233.72	111	122.72	0.232543
12	5.097	553.779	115	438.779	246.57	111	135.57	0.308971
13	4.2	756.02	115	641.02	246.055	111	135.055	0.210688
14	4.648	475.754	115	360.754	209.868	111	98.868	0.274059
15	2.606	567.083	115	452.083	310.057	111	199.057	0.440311
16	3.088	625.57	115	510.57	316.199	111	205.199	0.401902
17	2.042	460.732	115	345.732	142.325	111	31.325	0.0906049
18	4.665	795.594	115	680.594	216.082	111	105.082	0.154397
19	2.606	436.694	115	321.694	151.191	111	40.191	0.124935
20	4.715	607.204	115	492.204	242.106	111	131.106	0.266365
21	3.768	511.427	115	396.427	202.811	111	91.811	0.231596
22	4.183	475.857	115	360.857	135.873	111	24.873	0.0689276
23	3.702	576.117	115	461.117	240.973	111	129.973	0.281866
24	2.54	533.902	115	418.902	230.51	111	119.51	0.285293
25	2.274	614.825	115	499.825	290.139	111	179.139	0.358403
26	2.059	631.21	115	516.21	188.815	111	77.815	0.150743
27	2.191	611.826	115	496.826	197.667	111	86.667	0.174441
28	3.287	581.818	115	466.818	290.439	111	179.439	0.384387
29	2.108	382.843	115	267.843	156.551	111	45.551	0.170066
30	4.167	590.127	115	475.127	242.884	111	131.884	0.277576
31	3.088	630.484	115	515.484	245.78	111	134.78	0.261463
32	2.407	553.49	115	438.49	185.531	111	74.531	0.169972
33	3.104	520.824	115	405.824	437.246	111	326.246	0.80391
34	4.748	569.024	115	454.024	181.49	111	70.49	0.155256
35	6.64	601.633	115	486.633	251.28	111	140.28	0.288267
36	4.084	643.667	115	528.667	260.541	111	149.541	0.282864
37	3.055	823.092	115	708.092	312.457	111	201.457	0.284507
38	9.147	586.24	115	471.24	217.691	111	106.691	0.226405
39	4.266	784.767	115	669.767	288.782	111	177.782	0.265439
40	4.233	502.267	115	387.267	163.125	111	52.125	0.134597
41	2.125	499.242	115	384.242	125.758	111	14.758	0.0384081
42	2.64	837.264	115	722.264	305.994	111	194.994	0.269976
43	4.831	558.643	115	443.643	153	111	42	0.0946707
44	3.735	715.96	115	600.96	467.124	111	356.124	0.592592
45	2.075	602.4	115	487.4	339.84	111	228.84	0.469512
46	2.689	666.475	115	551.475	229.568	111	118.568	0.215002
47	3.951	663.782	115	548.782	295.643	111	184.643	0.33646
48	4.997	653.944	115	538.944	246.11	111	135.11	0.250694
49	2.225	746.537	115	631.537	407.955	111	296.955	0.47021
50	2.606	491.223	115	376.223	213.357	111	102.357	0.272065
51	6.84	701.883	115	586.883	335.988	111	224.988	0.383361
52	3.951	644.042	115	529.042	232.546	111	121.546	0.229747
53	2.241	678.874	115	563.874	284.763	111	173.763	0.308159
54	4.516	758.452	115	643.452	378.522	111	267.522	0.415761
55	6.408	615.301	115	500.301	392.246	111	281.246	0.562154
56	5.213	691.917	115	576.917	187.217	111	76.217	0.132111
57	2.723	851.329	115	736.329	836.518	111	725.518	0.985318
58	2.324	640.814	115	525.814	336.614	111	225.614	0.429076
59	3.951	616.034	115	501.034	312.765	111	201.765	0.402697
60	2.357	419.127	115	304.127	162.838	111	51.838	0.170449
61	2.092	835.722	115	720.722	730.659	111	619.659	0.859775
62	2.822	549.418	115	434.418	181.676	111	70.676	0.162691
63	2.158	505.385	115	390.385	155.915	111	44.915	0.115053
64	2.806	607.024	115	492.024	559.645	111	448.645	0.911836
65	4.416	537.226	115	422.226	194.82	111	83.82	0.198519
66	2.274	684.796	115	569.796	315.584	111	204.584	0.359048
67	2.623	683.994	115	568.994	271.791	111	160.791	0.282588
68	4.997	586.07	115	471.07	402.07	111	291.07	0.617891
69	15.705	770.137	115	655.137	466.544	111	355.544	0.542702
70	3.901	775.536	115	660.536	163.562	111	52.562	0.0795748
71	2.706	686.816	115	571.816	203.429	111	92.429	0.161641
72	2.49	386.187	115	271.187	195.373	111	84.373	0.311125
73	2.706	541	115	426	211.485	111	100.485	0.23588
74	2.922	562.551	115	447.551	170.494	111	59.494	0.132932
75	2.457	504.932	115	389.932	178.601	111	67.601	0.173366
76	3.636	512.726	115	397.726	231.982	111	120.982	0.304184
77	3.586	867.019	115	752.019	310.269	111	199.269	0.264979
78	2.54	715.072	115	600.072	259.248	111	148.248	0.24705
79	6.259	1015.02	115	900.024	963.83	111	852.83	0.947564
80	4.266	614.926	115	499.926	237.175	111	126.175	0.252387
81	2.457	666.926	115	551.926	201.986	111	90.986	0.164852
82	10.177	717.093	115	602.093	295.931	111	184.931	0.307147
83	5.644	806.509	115	691.509	583.509	111	472.509	0.683301
84	6.408	547.889	115	432.889	494.402	111	383.402	0.885682
85	2.142	657.101	115	542.101	313.891	111	202.891	0.374268
86	5.644	955.506	115	840.506	346.368	111	235.368	0.280031
87	3.702	736.803	115	621.803	376.552	111	265.552	0.427068
88	2.241	567.304	115	452.304	151.867	111	40.867	0.0903529
89	2.54	659.634	115	544.634	166.477	111	55.477	0.101861
90	2.474	765.577	115	650.577	316.631	111	205.631	0.316075
91	7.205	677.138	115	562.138	464.484	111	353.484	0.628821
92	7.985	639.927	115	524.927	280.9	111	169.9	0.323664
93	6.624	513.702	115	398.702	199.168	111	88.168	0.221138
94	2.988	722.7	115	607.7	404.5	111	293.5	0.482969
95	6.093	901.033	115	786.033	348.956	111	237.956	0.30273
96	2.025	516.934	115	401.934	187.811	111	76.811	0.191104
97	2.756	866.253	115	751.253	579.139	111	468.139	0.623144
98	2.855	533.901	115	418.901	223.407	111	112.407	0.268338
99	4.35	715.221	115	600.221	337.679	111	226.679	0.377659
100	3.42	931.252	115	816.252	974.733	111	863.733	1.05817
101	3.47	637.589	115	522.589	296.177	111	185.177	0.354345
102	4.466	594.576	115	479.576	174.662	111	63.662	0.132746
103	2.241	910.363	115	795.363	327.007	111	216.007	0.271583
104	4.748	605.353	115	490.353	247.171	111	136.171	0.2777
105	4.001	602.747	115	487.747	163.178	111	52.178	0.106978
106	4.466	934.993	115	819.993	755.048	111	644.048	0.785431
107	2.689	541.148	115	426.148	284.846	111	173.846	0.407947
108	5.429	745.128	115	630.128	395.991	111	284.991	0.452275
109	2.308	689.784	115	574.784	205.353	111	94.353	0.164154
110	2.822	961.776	115	846.776	586.547	111	475.547	0.561597
111	4.814	784.779	115	669.779	411.152	111	300.152	0.448136
112	3.752	424.27	115	309.27	185.823	111	74.823	0.241934
113	5.312	500.959	115	385.959	195.488	111	84.488	0.218904
114	5.113	938.64	115	823.64	735.205	111	624.205	0.757861
115	2.988	723.856	115	608.856	413.811	111	302.811	0.497344
116	4.914	694.321	115	579.321	362.169	111	251.169	0.433558
117	3.436	417.217	115	302.217	195.502	111	84.502	0.279607
118	4.682	439.578	115	324.578	226.869	111	115.869	0.356984
119	2.706	721.871	115	606.871	542.626	111	431.626	0.711232
120	6.425	734.695	115	619.695	298.145	111	187.145	0.301995
121	5.877	457.602	115	342.602	205.901	111	94.901	0.277001
122	3.818	447.157	115	332.157	189.565	111	78.565	0.23653
123	8.068	715.525	115	600.525	346.434	111	235.434	0.392047
124	3.104	380.481	115	265.481	193.23	111	82.23	0.30974
125	3.187	578.01	115	463.01	242.583	111	131.583	0.28419
126	2.955	479.691	115	364.691	174.27	111	63.27	0.173489
127	8.699	815.439	115	700.439	406.975	111	295.975	0.422556
128	4.648	628.011	115	513.011	281.554	111	170.554	0.332457
129	2.507	720.629	115	605.629	327.762	111	216.762	0.357912
130	7.139	731.579	115	616.579	529.951	111	418.951	0.679477
131	2.955	696.393	115	581.393	877.562	111	766.562	1.31849
132	3.885	800.962	115	685.962	380.009	111	269.009	0.392163
133	2.523	628.007	115	513.007	374.605	111	263.605	0.513843
134	2.905	799.64	115	684.64	835.863	111	724.863	1.05875
135	10.575	763.193	115	648.193	402.816	111	291.816	0.450199
136	2.972	416.888	115	301.888	170.324	111	59.324	0.19651
137	2.938	652.475	115	537.475	257.774	111	146.774	0.273081
138	5.727	712.194	115	597.194	392.145	111	281.145	0.470777
139	2.009	911.686	115	796.686	359.496	111	248.496	0.311912
140	8.201	442.933	115	327.933	187.717	111	76.717	0.233941
141	2.175	718.466	115	603.466	416.031	111	305.031	0.505465
142	7.703	650.75	115	535.75	277.731	111	166.731	0.31121
143	3.968	749.682	115	634.682	552.795	111	441.795	0.696089
144	2.54	666.608	115	551.608	301.83	111	190.83	0.345952
145	6.64	692.55	115	577.55	580.68	111	469.68	0.813228
146	2.059	986.089	115	871.089	370.718	111	259.718	0.298153
147	3.984	555.846	115	440.846	207.363	111	96.363	0.218587
148	2.341	607.255	115	492.255	171.468	111	60.468	0.122839
149	3.636	589.169	115	474.169	209.265	111	98.265	0.207236
150	2.606	416.338	115	301.338	216.318	111	105.318	0.349501
151	4.848	419.87	115	304.87	207.452	111	96.452	0.316371
152	2.308	628.813	115	513.813	278.813	111	167.813	0.326603
153	3.37	754.926	115	639.926	424.788	111	313.788	0.49035
154	2.258	437.647	115	322.647	218.044	111	107.044	0.331768
155	3.403	548.405	115	433.405	384.62	111	273.62	0.631326
156	6.159	480.792	115	365.792	215.817	111	104.817	0.286548
157	4.682	803.355	115	688.355	777.887	111	666.887	0.968813
158	3.951	699.395	115	584.395	261.084	111	150.084	0.256819
159	3.536	519.094	115	404.094	256.268	111	145.268	0.359491
160	3.503	589.218	115	474.218	181.171	111	70.171	0.147972
161	3.768	544.824	115	429.824	207.934	111	96.934	0.22552
162	3.951	437.181	115	322.181	283.966	111	172.966	0.53686
163	2.872	475.555	115	360.555	238	111	127	0.352235
164	3.47	621.923	115	506.923	341.282	111	230.282	0.454274
165	3.984	533.229	115	418.229	234.912	111	123.912	0.296278
166	6.126	592.623	115	477.623	172.255	111	61.255	0.12825
167	7.022	653.624	115	538.624	321.158	111	210.158	0.390176
168	2.557	616.922	115	501.922	152.766	111	41.766	0.0832121
169	2.175	556.618	115	441.618	237.588	111	126.588	0.286646
170	2.125	428.031	115	313.031	138.266	111	27.266	0.0871032
171	2.806	569.716	115	454.716	187.68	111	76.68	0.168633
172	2.523	569.434	115	454.434	208.375	111	97.375	0.214278
173	2.407	468.524	115	353.524	177.221	111	66.221	0.187317
174	3.785	407.175	115	292.175	180.404	111	69.404	0.237543
175	3.934	430.485	115	315.485	184.143	111	73.143	0.231843
176	3.088	506.78	115	391.78	191.522	111	80.522	0.205529
177	6.508	501.013	115	386.013	219.696	111	108.696	0.281586
178	4.3	640.054	115	525.054	268.127	111	157.127	0.299259
179	7.836	471.051	115	356.051	233.25	111	122.25	0.34335
180	2.756	513.229	115	398.229	159.843	111	48.843	0.122651
181	4.1	456.769	115	341.769	217.676	111	106.676	0.312129
182	5.927	454.112	115	339.112	230.14	111	119.14	0.351329
183	3.221	456.113	115	341.113	189	111	78	0.228663
184	2.042	461.846	115	346.846	155.057	111	44.057	0.127022
185	8.101	401.451	115	286.451	172.307	111	61.307	0.214023
186	6.076	592.579	115	477.579	198.44	111	87.44	0.18309
187	2.706	408.11	115	293.11	235.503	111	124.503	0.424765
188	4.947	464.07	115	349.07	337.309	111	226.309	0.64832
189	2.64	454.836	115	339.836	156.522	111	45.522	0.133953
190	2.573	530.168	115	415.168	342.51	111	231.51	0.55763
191	2.889	423.73	115	308.73	228.42	111	117.42	0.380332
192	2.689	456.019	115	341.019	187.253	111	76.253	0.223603
193	7.487	428.984	115	313.984	144.698	111	33.698	0.107324
194	2.938	401.638	115	286.638	190.051	111	79.051	0.275787
195	2.806	481.231	115	366.231	202.84	111	91.84	0.250771
196	2.125	380.422	115	265.422	200.352	111	89.352	0.336641
197	3.785	406.667	115	291.667	158.934	111	47.934	0.164345
198	2.806	474.172	115	359.172	184.982	111	73.982	0.205979
199	3.619	441.482	115	326.482	127.72	111	16.72	0.0512126
200	3.47	402.833	115	287.833	149.502	111	38.502	0.133765
201	2.905	462.891	115	347.891	142.097	111	31.097	0.0893872
202	6.823	473.81	115	358.81	215.163	111	104.163	0.290301
203	3.187	446.057	115	331.057	157.005	111	46.005	0.138964
204	3.885	490.679	115	375.679	145.329	111	34.329	0.0913785
205	3.436	535.705	115	420.705	143.019	111	32.019	0.076108
206	13.762	501.686	115	386.686	172.2	111	61.2	0.158268
207	2.042	466.301	115	351.301	174.415	111	63.415	0.180515
208	4.814	521.907	115	406.907	218.817	111	107.817	0.264967
209	2.573	488.729	115	373.729	206.51	111	95.51	0.25556
210	16.734	440.351	115	325.351	188.764	111	77.764	0.239016
211	9.463	561.496	115	446.496	197.139	111	86.139	0.192922
212	2.523	528.737	115	413.737	207.849	111	96.849	0.234083
213	2.988	559.95	115	444.95	176.033	111	65.033	0.146158
214	2.142	509.411	115	394.411	151.698	111	40.698	0.103187
215	2.158	438.031	115	323.031	158.423	111	47.423	0.146806
216	3.171	455.016	115	340.016	120.728	111	9.728	0.0286104
217	6.69	569.878	115	454.878	177.968	111	66.968	0.147222
218	4.549	540.5	115	425.5	222.084	111	111.084	0.261067
219	3.27	419.954	115	304.954	166.431	111	55.431	0.181768
220	2.656	499.994	115	384.994	166.556	111	55.556	0.144304
221	7.653	611.588	115	496.588	176.727	111	65.727	0.132357
222	2.756	597.536	115	482.536	168.958	111	57.958	0.120111
223	2.54	502.222	115	387.222	146.013	111	35.013	0.090421
224	2.175	553.031	115	438.031	234.298	111	123.298	0.281482
225	8.284	631.004	115	516.004	220.323	111	109.323	0.211865
226	5.113	505.185	115	390.185	172.432	111	61.432	0.157443
227	6.325	652.01	115	537.01	235.304	111	124.304	0.231474
228	2.889	442.253	115	327.253	194.379	111	83.379	0.254785
229	3.42	651.888	115	536.888	169.607	111	58.607	0.109161
230	2.606	471.58	115	356.58	138.732	111	27.732	0.0777722
231	2.424	540.062	115	425.062	175.514	111	64.514	0.151776
232	5.014	568.404	115	453.404	370.772	111	259.772	0.572937
233	3.835	496.307	115	381.307	193.952	111	82.952	0.217546
234	2.706	541.779	115	426.779	203.393	111	92.393	0.216489
235	2.706	653.215	115	538.215	218.307	111	107.307	0.199376
236	2.457	679.797	115	564.797	169.02	111	58.02	0.102727
237	2.225	519.179	115	404.179	186.299	111	75.299	0.186301
238	5.163	723.01	115	608.01	283.688	111	172.688	0.284022
239	2.374	624.65	115	509.65	293.979	111	182.979	0.359029
240	6.757	650.754	115	535.754	289.622	111	178.622	0.333403
241	7.288	668.558	115	553.558	246.8	111	135.8	0.245322
242	3.602	598.295	115	483.295	167.488	111	56.488	0.116881
243	2.108	548	115	433	242.898	111	131.898	0.304614
244	2.523	660.664	115	545.664	227.059	111	116.059	0.212693
245	2.241	487.185	115	372.185	320.319	111	209.319	0.562406
246	4.167	742.39	115	627.39	420.438	111	309.438	0.493215
247	5.196	596.236	115	481.236	292.655	111	181.655	0.377476
248	2.158	575.046	115	460.046	221.862	111	110.862	0.24098
249	2.308	419.899	115	304.899	139.446	111	28.446	0.0932965
250	6.989	578.347	115	463.347	270.143	111	159.143	0.343464
251	6.076	564.063	115	449.063	234.205	111	123.205	0.27436
252	2.573	527.665	115	412.665	187.897	111	76.897	0.186342
253	2.872	684.092	115	569.092	301.225	111	190.225	0.334261
254	2.407	487.034	115	372.034	164.448	111	53.448	0.143664
255	3.685	622.347	115	507.347	222.595	111	111.595	0.219958
256	3.287	492.268	115	377.268	168.682	111	57.682	0.152894
257	12.152	645.176	115	530.176	370.21	111	259.21	0.488913
258	4.698	571.071	115	456.071	249.728	111	138.728	0.304181
259	2.142	553.713	115	438.713	254.078	111	143.078	0.326131
260	4.433	507.891	115	392.891	152.161	111	41.161	0.104764
261	3.42	674.063	115	559.063	404.859	111	293.859	0.525628
262	6.856	677.751	115	562.751	220.499	111	109.499	0.194578
263	4.399	683.283	115	568.283	438.272	111	327.272	0.575896
264	12.932	621.04	115	506.04	265.008	111	154.008	0.30434
265	2.938	600.175	115	485.175	166.977	111	55.977	0.115375
266	3.735	728.707	115	613.707	424.76	111	313.76	0.511254
267	2.507	515.371	115	400.371	237.026	111	126.026	0.314773
268	2.092	451.381	115	336.381	114.762	111	3.762	0.0111837
269	2.623	776.513	115	661.513	251.019	111	140.019	0.211665
270	2.025	553.828	115	438.828	121.951	111	10.951	0.0249551
271	2.059	503.113	115	388.113	156.79	111	45.79	0.117981
272	4.017	425.302	115	310.302	164.86	111	53.86	0.173573
273	7.089	656.721	115	541.721	238.717	111	127.717	0.235762
274	2.142	722.264	115	607.264	331.93	111	220.93	0.363812
275	2.391	516.09	115	401.09	278.25	111	167.25	0.416989
276	12.949	585.229	115	470.229	253.779	111	142.779	0.303637
277	2.706	742.049	115	627.049	426.663	111	315.663	0.50341
278	4.632	472.369	115	357.369	257.591	111	146.591	0.410195
279	3.071	687.027	115	572.027	320.259	111	209.259	0.36582
280	7.57	736.496	115	621.496	275.447	111	164.447	0.264599
281	8.251	853.191	115	738.191	421.698	111	310.698	0.420891
282	3.32	580.475	115	465.475	302.93	111	191.93	0.412331
283	3.353	701.792	115	586.792	439.941	111	328.941	0.560575
284	2.739	681.394	115	566.394	279.261	111	168.261	0.297074
285	4.333	729.146	115	614.146	268.659	111	157.659	0.256713
286	2.142	414.798	115	299.798	149.884	111	38.884	0.129701
287	4.897	504.092	115	389.092	238.831	111	127.831	0.328537
288	2.839	473.737	115	358.737	183.573	111	72.573	0.202301
289	3.138	627.921	115	512.921	342.91	111	231.91	0.452136
290	5.412	741.383	115	626.383	481.669	111	370.669	0.591761
291	2.656	526.925	115	411.925	191.269	111	80.269	0.194863
292	14.991	730.124	115	615.124	318.477	111	207.477	0.337293
293	3.32	832.94	115	717.94	739.88	111	628.88	0.875951
294	3.453	584.567	115	469.567	161.423	111	50.423	0.107382
295	4.532	803.341	115	688.341	673.956	111	562.956	0.817845
296	2.59	595.481	115	480.481	231.314	111	120.314	0.250403
297	4.067	485.029	115	370.029	132.624	111	21.624	0.0584387
298	14.31	839.001	115	724.001	437.414	111	326.414	0.450847
299	5.81	682.483	115	567.483	299.469	111	188.469	0.332114
300	2.855	578.651	115	463.651	413.337	111	302.337	0.652079
301	2.573	532.426	115	417.426	185.226	111	74.226	0.177818
302	6.956	666.885	115	551.885	302.468	111	191.468	0.346935
303	4.964	466.635	115	351.635	155.579	111	44.579	0.126776
304	2.208	600.068	115	485.068	233.015	111	122.015	0.251542
305	2.042	545.878	115	430.878	278.797	111	167.797	0.38943
306	3.519	483.387	115	368.387	169.868	111	58.868	0.159799
307	2.191	505.311	115	390.311	131.197	111	20.197	0.0517459
308	5.279	788.226	115	673.226	377.189	111	266.189	0.395393
309	9.927	813.704	115	698.704	494.584	111	383.584	0.548994
310	2.523	807.566	115	692.566	722.599	111	611.599	0.883091
311	4.914	688.676	115	573.676	336.611	111	225.611	0.393273
312	2.009	808.802	115	693.802	614.702	111	503.702	0.726003
313	21.781	608.758	115	493.758	297.012	111	186.012	0.376727
314	3.652	672.918	115	557.918	302.3	111	191.3	0.342882
315	3.951	664.113	115	549.113	417.046	111	306.046	0.557346
316	2.557	622.11	115	507.11	191.623	111	80.623	0.158985
317	2.225	625.47	115	510.47	613.731	111	502.731	0.984839
318	4.383	403.939	115	288.939	159.212	111	48.212	0.166859
319	2.474	852.705	115	737.705	393.047	111	282.047	0.38233
320	8.251	828.469	115	713.469	529.219	111	418.219	0.586177
321	2.64	704.925	115	589.925	330.396	111	219.396	0.371905
322	3.42	579.112	115	464.112	442.631	111	331.631	0.71455
323	4.433	756.375	115	641.375	509.079	111	398.079	0.620665
324	7.653	668.015	115	553.015	231.748	111	120.748	0.218345
325	3.138	769.185	115	654.185	273.169	111	162.169	0.247895
326	2.872	475.671	115	360.671	192.191	111	81.191	0.225111
327	9.131	786.618	115	671.618	294.025	111	183.025	0.272514
328	6.84	766.769	115	651.769	454.197	111	343.197	0.526562
329	3.569	412.926	115	297.926	200.419	111	89.419	0.300138
330	2.59	603.051	115	488.051	177.09	111	66.09	0.135416
331	10.658	873.914	115	758.914	555.238	111	444.238	0.58536
332	2.407	351.621	115	236.621	150.634	111	39.634	0.1675
333	2.623	675.437	115	560.437	365.241	111	254.241	0.453648
334	3.719	784.201	115	669.201	300.045	111	189.045	0.282494
335	2.274	733.496	115	618.496	370.577	111	259.577	0.419691
336	5.91	697.34	115	582.34	261.126	111	150.126	0.257798
337	2.457	673.804	115	558.804	270.635	111	159.635	0.285673
338	7.52	632.276	115	517.276	209.426	111	98.426	0.190278
339	2.623	675.709	115	560.709	273.063	111	162.063	0.289032
340	3.868	655.172	115	540.172	413.172	111	302.172	0.5594
341	2.49	376.7	115	261.7	204.987	111	93.987	0.35914
342	2.739	706.958	115	591.958	307.679	111	196.679	0.332252
343	7.288	463.077	115	348.077	171.692	111	60.692	0.174364
344	2.573	775.31	115	660.31	432.219	111	321.219	0.486467
345	6.773	693.248	115	578.248	371.044	111	260.044	0.44971
346	2.009	522.86	115	407.86	386.331	111	275.331	0.675063
347	8.848	544.124	115	429.124	254.013	111	143.013	0.333267
348	2.822	472.435	115	357.435	189.329	111	78.329	0.219142
349	5.545	571.913	115	456.913	348.422	111	237.422	0.519622
350	2.573	668.897	115	553.897	324.652	111	213.652	0.385725
351	5.727	776.786	115	661.786	422.586	111	311.586	0.470826
352	3.868	452.215	115	337.215	173.227	111	62.227	0.184532
353	4.034	680.922	115	565.922	522.152	111	411.152	0.726517
354	8.848	728.084	115	613.084	312.927	111	201.927	0.329363
355	5.146	527.623	115	412.623	385.216	111	274.216	0.664568
356	4.433	702.034	115	587.034	268.213	111	157.213	0.267809
357	11.77	712.992	115	597.992	435.639	111	324.639	0.542882
358	6.74	758.128	115	643.128	369.33	111	258.33	0.401677
359	2.938	417.525	115	302.525	185.684	111	74.684	0.246869
360	2.059	709.492	115	594.492	132.685	111	21.685	0.0364765
361	2.059	550.758	115	435.758	292.879	111	181.879	0.417385
362	2.407	407.297	115	292.297	192.241	111	81.241	0.27794
363	2.341	541.326	115	426.326	135.716	111	24.716	0.0579744
364	2.374	723.238	115	608.238	363.406	111	252.406	0.414979
365	2.507	467.629	115	352.629	230.801	111	119.801	0.339737
366	2.291	422.457	115	307.457	207.862	111	96.862	0.315042
367	4.897	533.736	115	418.736	213.071	111	102.071	0.24376
368	3.104	618.513	115	503.513	205.695	111	94.695	0.188069
369	2.208	417.466	115	302.466	188.158	111	77.158	0.255096
370	2.258	418.272	115	303.272	167.265	111	56.265	0.185527
371	3.254	646.536	115	531.536	225.99	111	114.99	0.216335
372	5.91	796.756	115	681.756	491.048	111	380.048	0.557455
373	2.357	379.542	115	264.542	147.908	111	36.908	0.139517
374	7.371	730.471	115	615.471	357.631	111	246.631	0.400719
375	3.403	653.693	115	538.693	222.073	111	111.073	0.20619
376	2.739	460.994	115	345.994	302.558	111	191.558	0.553645
377	2.557	763.455	115	648.455	394.506	111	283.506	0.437202
378	3.121	674.16	115	559.16	370.574	111	259.574	0.464221
379	8.898	547.89	115	432.89	243.103	111	132.103	0.305165
380	2.656	555.456	115	440.456	197.556	111	86.556	0.196515
381	3.088	649.511	115	534.511	234.43	111	123.43	0.230921
382	2.424	649.822	115	534.822	380.836	111	269.836	0.504534
383	5.628	666.944	115	551.944	354.696	111	243.696	0.441523
384	8.981	586.296	115	471.296	213.211	111	102.211	0.216872
385	8.716	502.406	115	387.406	267.438	111	156.438	0.403809
386	2.042	399.488	115	284.488	143.154	111	32.154	0.113024
387	2.357	691.155	115	576.155	255.979	111	144.979	0.251632
388	2.191	569.477	115	454.477	433.879	111	322.879	0.710441
389	3.436	447.367	115	332.367	198.488	111	87.488	0.263227
390	2.59	550.59	115	435.59	540.635	111	429.635	0.986329
391	2.407	515.021	115	400.021	289.903	111	178.903	0.447234
392	2.108	542.094	115	427.094	264.913	111	153.913	0.360373
393	9.728	571.712	115	456.712	251.73	111	140.73	0.308137
394	9.844	657.422	115	542.422	386.106	111	275.106	0.507181
395	2.507	440.742	115	325.742	188.954	111	77.954	0.239312
396	2.938	581.006	115	466.006	207.475	111	96.475	0.207025
397	3.187	636.505	115	521.505	210.068	111	99.068	0.189966
398	3.968	564.941	115	449.941	156.623	111	45.623	0.101398
399	5.96	671.329	115	556.329	399.421	111	288.421	0.518436
400	2.706	585.417	115	470.417	213.914	111	102.914	0.218772
401	2.092	705.81	115	590.81	333.286	111	222.286	0.376239
402	2.59	513.808	115	398.808	193	111	82	0.205613
403	4.266	700.342	115	585.342	261.451	111	150.451	0.257031
404	7.653	651.731	115	536.731	205.926	111	94.926	0.17686
405	4.632	615.659	115	500.659	344.011	111	233.011	0.465409
406	5.694	606.122	115	491.122	312.248	111	201.248	0.409772
407	4.964	564.883	115	449.883	251.02	111	140.02	0.311236
408	8.55	590.406	115	475.406	183.703	111	72.703	0.152928
409	2.225	520.649	115	405.649	267.91	111	156.91	0.386812
410	9.579	937.92	115	822.92	263.003	111	152.003	0.184712
411	2.191	411.917	115	296.917	255	111	144	0.484984
412	2.142	455.357	115	340.357	275.628	111	164.628	0.483692
413	2.573	514.148	115	399.148	244.774	111	133.774	0.335149
414	2.424	591.733	115	476.733	550.438	111	439.438	0.92177
415	3.403	530.961	115	415.961	141.834	111	30.834	0.0741271
416	3.619	652.45	115	537.45	208.358	111	97.358	0.181148
417	2.092	375.54	115	260.54	167.968	111	56.968	0.218654
418	2.158	354.123	115	239.123	201.631	111	90.631	0.379014
419	2.855	481.448	115	366.448	215.663	111	104.663	0.285615
420	4.632	572.685	115	457.685	264.774	111	153.774	0.335982
421	3.42	447.112	115	332.112	209.296	111	98.296	0.295972
422	4.648	521.679	115	406.679	411.068	111	300.068	0.73785
423	5.976	451.114	115	336.114	199.661	111	88.661	0.263783
424	3.005	531.436	115	416.436	249.812	111	138.812	0.333333
425	6.01	487.124	115	372.124	285.818	111	174.818	0.469784
426	2.938	496.073	115	381.073	158.966	111	47.966	0.125871
427	4.316	536.931	115	421.931	182.715	111	71.715	0.169969
428	3.934	402.439	115	287.439	191.055	111	80.055	0.278511
429	7.404	434.639	115	319.639	207.388	111	96.388	0.301553
430	4.316	479.646	115	364.646	152.435	111	41.435	0.113631
431	5.495	403.819	115	288.819	144.71	111	33.71	0.116717
432	3.337	405.716	115	290.716	148	111	37	0.127272
433	3.254	481.776	115	366.776	279.378	111	168.378	0.459076
434	3.918	442.72	115	327.72	143.936	111	32.936	0.1005
435	3.221	500.005	115	385.005	191.392	111	80.392	0.208808
436	3.536	480.089	115	365.089	207.221	111	96.221	0.263555
437	2.308	356.086	115	241.086	170.187	111	59.187	0.245502
438	3.221	415.51	115	300.51	204.397	111	93.397	0.310795
439	2.656	386.788	115	271.788	155.675	111	44.675	0.164374
440	2.291	481.058	115	366.058	188.681	111	77.681	0.21221
441	5.976	442.025	115	327.025	161.578	111	50.578	0.154661
442	2.523	391.684	115	276.684	186.428	111	75.428	0.272614
443	4.648	388.146	115	273.146	147.704	111	36.704	0.134375
444	2.457	386.297	115	271.297	208.73	111	97.73	0.360233
445	4.814	453.186	115	338.186	167.359	111	56.359	0.166651
446	2.025	429.098	115	314.098	133.844	111	22.844	0.0727289
447	2.142	426.202	115	311.202	175.69	111	64.69	0.207871
448	2.789	416.006	115	301.006	180.137	111	69.137	0.229686
449	2.54	424.549	115	309.549	131.484	111	20.484	0.0661737
450	2.407	396.793	115	281.793	158.076	111	47.076	0.167059
451	2.922	428.057	115	313.057	147.551	111	36.551	0.116755
452	3.104	415.449	115	300.449	183.54	111	72.54	0.241439
453	2.756	419.994	115	304.994	201.946	111	90.946	0.298189
454	4.167	456.757	115	341.757	302.482	111	191.482	0.560287
455	5.744	564.702	115	449.702	226.882	111	115.882	0.257686
456	2.889	460.822	115	345.822	123.592	111	12.592	0.0364118
457	2.573	475.503	115	360.503	179.858	111	68.858	0.191005
458	5.213	515.204	115	400.204	227.293	111	116.293	0.290584
459	3.503	538.9	115	423.9	231.848	111	120.848	0.285086
460	2.689	496.809	115	381.809	146.568	111	35.568	0.0931565
461	4.266	503.833	115	388.833	181.3	111	70.3	0.180797
462	4.615	492.496	115	377.496	191.367	111	80.367	0.212895
463	2.258	427.551	115	312.551	139.838	111	28.838	0.0922665
464	3.187	581.271	115	466.271	216.328	111	105.328	0.225894
465	5.03	508.554	115	393.554	181.957	111	70.957	0.180298
466	7.935	484.554	115	369.554	230.052	111	119.052	0.32215
467	2.64	454.358	115	339.358	256.937	111	145.937	0.430038
468	3.569	620.223	115	505.223	235.735	111	124.735	0.246891
469	3.868	480.957	115	365.957	274.446	111	163.446	0.446626
470	2.457	577.919	115	462.919	218.061	111	107.061	0.231274
471	2.308	455.59	115	340.59	121.187	111	10.187	0.0299099
472	2.44	455.694	115	340.694	118.639	111	7.639	0.0224219
473	4.433	577.876	115	462.876	239.36	111	128.36	0.27731
474	3.42	468.233	115	353.233	248.578	111	137.578	0.389482
475	7.022	501.267	115	386.267	193.787	111	82.787	0.214326
476	4.283	570	115	455	219.039	111	108.039	0.237448
477	2.474	471.342	115	356.342	166.926	111	55.926	0.156945
478	24.885	518.991	115	403.991	238.297	111	127.297	0.315099
479	9.429	612.783	115	497.783	301.577	111	190.577	0.382852
480	2.158	700.946	115	585.946	201.177	111	90.177	0.1539
481	2.772	517.515	115	402.515	211.437	111	100.437	0.249524
482	3.304	587.216	115	472.216	461.864	111	350.864	0.743016
483	2.175	465.947	115	350.947	184.992	111	73.992	0.210835
484	2.258	575.86	115	460.86	221.625	111	110.625	0.24004
485	5.86	568.215	115	453.215	243.53	111	132.53	0.292422
486	3.951	392.403	115	277.403	146.588	111	35.588	0.12829
487	2.407	632.379	115	517.379	150.441	111	39.441	0.0762323
488	2.391	474.444	115	359.444	174.507	111	63.507	0.176681
489	3.005	690.867	115	575.867	289.801	111	178.801	0.31049
490	5.81	529.354	115	414.354	223.454	111	112.454	0.271396
491	4.134	686.173	115	571.173	271.177	111	160.177	0.280435
492	5.014	664.295	115	549.295	341.613	111	230.613	0.419835
493	4.798	691.484	115	576.484	362.343	111	251.343	0.435993
494	2.324	514.136	115	399.136	245.429	111	134.429	0.3368
495	6.674	636.729	115	521.729	373.132	111	262.132	0.502429
496	2.523	557.329	115	442.329	278.151	111	167.151	0.377888
497	2.474	568.201	115	453.201	306.933	111	195.933	0.432331
498	6.375	384.133	115	269.133	156.411	111	45.411	0.168731
499	4.333	605.165	115	490.165	142.632	111	31.632	0.0645334
500	5.163	511.113	115	396.113	274.26	111	163.26	0.412155
501	2.789	548.488	115	433.488	148.262	111	37.262	0.0859586
502	2.606	712.178	115	597.178	194.089	111	83.089	0.139136
503	6.508	541.311	115	426.311	316.469	111	205.469	0.48197
504	3.619	584.706	115	469.706	138.642	111	27.642	0.0588496
505	2.507	498.709	115	383.709	251.735	111	140.735	0.366775
506	6.823	702.723	115	587.723	309.545	111	198.545	0.337821
507	5.312	618.534	115	503.534	271.738	111	160.738	0.31922
508	4.582	676.091	115	561.091	325.17	111	214.17	0.381703
509	3.968	600.318	115	485.318	219.075	111	108.075	0.222689
510	2.689	618.228	115	503.228	325.654	111	214.654	0.426554
511	2.092	527.19	115	412.19	118.675	111	7.675	0.0186201
512	5.744	700.939	115	585.939	267.592	111	156.592	0.26725
513	5.711	564.814	115	449.814	205.619	111	94.619	0.210351
514	2.889	740.23	115	625.23	309.764	111	198.764	0.317905
515	6.889	497.913	115	382.913	191.937	111	80.937	0.211372
516	20.204	689.351	115	574.351	391.689	111	280.689	0.488706
517	4.964	522.254	115	407.254	162.388	111	51.388	0.126182
518	2.341	551.333	115	436.333	193.128	111	82.128	0.188223
519	2.922	649.074	115	534.074	499.682	111	388.682	0.727768
520	3.968	501.795	115	386.795	179.213	111	68.213	0.176354
521	3.154	605.489	115	490.489	776.453	111	665.453	1.35671
522	2.739	623.564	115	508.564	196.345	111	85.345	0.167816
523	4.997	605.771	115	490.771	322.502	111	211.502	0.430959
524	2.391	715.479	115	600.479	215.625	111	104.625	0.174236
525	2.009	561.62	115	446.62	162.314	111	51.314	0.114894
526	7.57	671.658	115	556.658	367.068	111	256.068	0.46001
527	3.138	567.825	115	452.825	243.783	111	132.783	0.293232
528	3.254	575.454	115	460.454	258.633	111	147.633	0.320625
529	2.108	406.142	115	291.142	165.118	111	54.118	0.185882
530	6.109	614.166	115	499.166	291.454	111	180.454	0.361511
531	10.16	601.859	115	486.859	278.837	111	167.837	0.344734
532	2.208	426.008	115	311.008	138.571	111	27.571	0.0886505
533	2.64	496.138	115	381.138	296.371	111	185.371	0.486362
534	5.727	542.017	115	427.017	192.168	111	81.168	0.190081
535	2.806	531.911	115	416.911	168.385	111	57.385	0.137643
536	2.391	476.986	115	361.986	142.368	111	31.368	0.0866553
537	3.071	473.622	115	358.622	225.778	111	114.778	0.320053
538	6.01	776.464	115	661.464	502.133	111	391.133	0.591314
539	3.934	668.743	115	553.743	195.063	111	84.063	0.151809
540	3.519	581.009	115	466.009	209.642	111	98.642	0.211674
541	18.759	753.047	115	638.047	416.411	111	305.411	0.478665
542	2.258	540.169	115	425.169	216.846	111	105.846	0.24895
543	2.839	788.673	115	673.673	499.099	111	388.099	0.576094
544	5.777	691.457	115	576.457	339.836	111	228.836	0.39697
545	4.781	455.014	115	340.014	150.222	111	39.222	0.115354
546	7.554	671.112	115	556.112	357.295	111	246.295	0.442887
547	4.781	941.951	115	826.951	512.833	111	401.833	0.485921
548	2.341	748.121	115	633.121	236.546	111	125.546	0.198297
549	3.387	486.338	115	371.338	394.495	111	283.495	0.763442
550	2.905	669.28	115	554.28	186.857	111	75.857	0.136857
551	6.192	875.44	115	760.44	309.592	111	198.592	0.261154
552	3.27	521.558	115	406.558	182.086	111	71.086	0.174848
553	3.785	664.614	115	549.614	159.096	111	48.096	0.0875087
554	5.611	593.663	115	478.663	171.84	111	60.84	0.127104
555	7.421	825.564	115	710.564	310.029	111	199.029	0.2801
556	4.665	485.167	115	370.167	136.203	111	25.203	0.0680855
557	2.855	676.831	115	561.831	290.884	111	179.884	0.320175
558	3.685	674.5	115	559.5	411.288	111	300.288	0.536708
559	5.528	733.036	115	618.036	470	111	359	0.580872
560	3.436	828.758	115	713.758	917.976	111	806.976	1.1306
561	2.125	477.711	115	362.711	252.602	111	141.602	0.390399
562	10.658	714.22	115	599.22	219.81	111	108.81	0.181586
563	4.167	615.199	115	500.199	426.267	111	315.267	0.630283
564	3.005	725.939	115	610.939	318.304	111	207.304	0.33932
565	6.159	588.763	115	473.763	264.844	111	153.844	0.324728
566	4.897	528.583	115	413.583	163.888	111	52.888	0.127878
567	2.756	650.09	115	535.09	355.837	111	244.837	0.457562
568	2.241	603.704	115	488.704	665.2	111	554.2	1.13402
569	2.241	563.556	115	448.556	217.881	111	106.881	0.238278
570	3.719	486.228	115	371.228	352.714	111	241.714	0.65112
571	5.047	605.97	115	490.97	225.368	111	114.368	0.232943
572	3.254	454.367	115	339.367	183.143	111	72.143	0.212581
573	4.051	838.918	115	723.918	312.787	111	201.787	0.278743
574	5.296	751.865	115	636.865	371.188	111	260.188	0.408545
575	2.557	477.565	115	362.565	226.481	111	115.481	0.318511
576	2.739	706.624	115	591.624	207.776	111	96.776	0.163577
577	2.357	732.62	115	617.62	442.93	111	331.93	0.537434
578	2.009	601.074	115	486.074	283.397	111	172.397	0.354672
579	4.266	754.704	115	639.704	351.58	111	240.58	0.37608
580	8.5	615.199	115	500.199	209.824	111	98.824	0.197569
581	2.407	662.379	115	547.379	234.931	111	123.931	0.226408
582	2.988	635.172	115	520.172	328.367	111	217.367	0.417875
583	2.308	405.763	115	290.763	141.007	111	30.007	0.103201
584	3.453	527.779	115	412.779	256.279	111	145.279	0.351953
585	2.175	390.046	115	275.046	183.634	111	72.634	0.264079
586	7.321	646.943	115	531.943	214.816	111	103.816	0.195164
587	2.855	598.89	115	483.89	206.465	111	95.465	0.197287
588	6.956	649.79	115	534.79	346.196	111	235.196	0.439791
589	7.454	848.394	115	733.394	427.091	111	316.091	0.430998
590	3.602	705.484	115	590.484	609.217	111	498.217	0.843743
591	3.37	619.261	115	504.261	229.66	111	118.66	0.235315
592	3.702	572.094	115	457.094	282.112	111	171.112	0.374348
593	4.781	528.087	115	413.087	221.25	111	110.25	0.266893
594	7.52	591.748	115	476.748	232.896	111	121.896	0.255682
595	4.715	820.887	115	705.887	444.176	111	333.176	0.471996
596	2.44	524.136	115	409.136	231.313	111	120.313	0.294066
597	2.407	479.234	115	364.234	402.993	111	291.993	0.801663
598	4.765	561.889	115	446.889	218.62	111	107.62	0.24082
599	3.353	403.347	115	288.347	140.416	111	29.416	0.102016
600	3.104	466.631	115	351.631	219.305	111	108.305	0.308008
601	2.822	579.753	115	464.753	291.806	111	180.806	0.389037
602	16.966	752.182	115	637.182	462.188	111	351.188	0.551158
603	4.217	410.811	115	295.811	148.165	111	37.165	0.125638
604	4.914	668.328	115	553.328	415.382	111	304.382	0.550093
605	5.229	550.835	115	435.835	230.295	111	119.295	0.273716
606	3.685	509.126	115	394.126	225.113	111	114.113	0.289534
607	2.606	475.261	115	360.261	256.045	111	145.045	0.402611
608	4.931	388.835	115	273.835	196.936	111	85.936	0.313824
609	3.42	478.262	115	363.262	184.058	111	73.058	0.201117
610	5.462	554.626	115	439.626	199.17	111	88.17	0.200557
611	5.661	779.724	115	664.724	438.449	111	327.449	0.492609
612	4.134	409.759	115	294.759	198.446	111	87.446	0.296669
613	4.499	616.83	115	501.83	372.893	111	261.893	0.521876
614	7.686	636.888	115	521.888	291.691	111	180.691	0.346226
615	4.931	724.997	115	609.997	343.125	111	232.125	0.380535
616	2.092	665.381	115	550.381	461.643	111	350.643	0.637091
617	3.27	391.03	115	276.03	161.563	111	50.563	0.183179
618	4.183	498.968	115	383.968	158.377	111	47.377	0.123388
619	4.35	606.454	115	491.454	319.87	111	208.87	0.425004
620	2.391	572.368	115	457.368	229.326	111	118.326	0.258711
621	7.819	775.246	115	660.246	317.654	111	206.654	0.312995
622	2.424	443.781	115	328.781	208.774	111	97.774	0.297383
623	9.23	481.11	115	366.11	193.095	111	82.095	0.224236
624	2.706	636.601	115	521.601	227.54	111	116.54	0.223427
625	2.191	615.727	115	500.727	369.121	111	258.121	0.515492
626	2.889	487.782	115	372.782	186.391	111	75.391	0.202239
627	4.3	546.907	115	431.907	274.749	111	163.749	0.37913
628	4.017	595.517	115	480.517	209.682	111	98.682	0.205366
629	3.519	506.505	115	391.505	178.519	111	67.519	0.17246
630	2.009	515.471	115	400.471	177.719	111	66.719	0.166601
631	4.599	550.307	115	435.307	296.296	111	185.296	0.425667
632	4.017	504.095	115	389.095	228.463	111	117.463	0.301888
633	5.545	805.195	115	690.195	285.997	111	174.997	0.253547
634	3.934	641.852	115	526.852	182.578	111	71.578	0.13586
635	2.938	494.203	115	379.203	229	111	118	0.311179
636	3.237	434.503	115	319.503	211.108	111	100.108	0.313324
637	15.24	580.02	115	465.02	314.939	111	203.939	0.43856
638	3.702	482.265	115	367.265	273.722	111	162.722	0.443064
639	2.241	532.267	115	417.267	183.148	111	72.148	0.172906
640	2.457	505.061	115	390.061	282.209	111	171.209	0.438929
641	9.745	551.963	115	436.963	293.855	111	182.855	0.418468
642	8.251	633.509	115	518.509	303.588	111	192.588	0.371427
643	2.291	511.333	115	396.333	370.92	111	259.92	0.655812
644	3.088	511.586	115	396.586	279.597	111	168.597	0.425121
645	2.706	496.337	115	381.337	176.503	111	65.503	0.171772
646	7.703	580.631	115	465.631	293.782	111	182.782	0.392547
647	2.142	401.364	115	286.364	183.698	111	72.698	0.253866
648	2.208	506.09	115	391.09	350.135	111	239.135	0.611458
649	2.075	422.16	115	307.16	164.44	111	53.44	0.173981
650	2.225	548.985	115	433.985	278.47	111	167.47	0.385889
651	2.125	406.164	115	291.164	173.742	111	62.742	0.215487
652	3.254	658.816	115	543.816	247.954	111	136.954	0.251839
653	4.831	439.182	115	324.182	211.887	111	100.887	0.311205
654	5.13	559.871	115	444.871	210.54	111	99.54	0.22375
655	4.017	471.988	115	356.988	183.438	111	72.438	0.202914
656	4.25	539.125	115	424.125	302.871	111	191.871	0.452393
657	2.972	489.145	115	374.145	205.229	111	94.229	0.251852
658	4.599	515.3	115	400.3	183.278	111	72.278	0.18056
659	2.905	387.263	115	272.263	209.6	111	98.6	0.36215
660	3.868	486.159	115	371.159	198.841	111	87.841	0.236667
661	2.606	498.242	115	383.242	176.433	111	65.433	0.170735
662	2.872	592.775	115	477.775	264.676	111	153.676	0.321649
663	3.652	460.705	115	345.705	187.718	111	76.718	0.221918
664	2.772	421.383	115	306.383	163.479	111	52.479	0.171286
665	2.557	434.864	115	319.864	239.045	111	128.045	0.400311
666	2.324	406.8	115	291.8	165.293	111	54.293	0.186062
667	2.507	391.152	115	276.152	184.444	111	73.444	0.265955
668	2.142	376.884	115	261.884	166.837	111	55.837	0.213213
669	3.005	472.376	115	357.376	220.58	111	109.58	0.306624
670	3.121	372.872	115	257.872	161.532	111	50.532	0.195958
671	3.038	389.022	115	274.022	187.191	111	76.191	0.278047
672	3.304	415.784	115	300.784	152.281	111	41.281	0.137245
673	2.125	414.594	115	299.594	144.109	111	33.109	0.110513
674	2.009	399.802	115	284.802	108.488	111	0	0
675	4.316	426.812	115	311.812	194.708	111	83.708	0.268457
676	5.296	411.282	115	296.282	142.627	111	31.627	0.106746
677	4.549	417.259	115	302.259	169.292	111	58.292	0.192854
678	2.308	403.345	115	288.345	154.942	111	43.942	0.152394
679	3.619	431.069	115	316.069	156.431	111	45.431	0.143738
680	3.304	380.07	115	265.07	198.332	111	87.332	0.329468
681	6.723	533.56	115	418.56	243.195	111	132.195	0.315833
682	2.49	417.707	115	302.707	166.7	111	55.7	0.184006
683	2.108	496.819	115	381.819	181.772	111	70.772	0.185355
684	2.988	521.117	115	406.117	214.678	111	103.678	0.255291
685	3.37	497.296	115	382.296	280.271	111	169.271	0.442775
686	2.557	451.182	115	336.182	236.714	111	125.714	0.373946
687	2.623	621.158	115	506.158	168.677	111	57.677	0.113951
688	8.168	462.226	115	347.226	185.439	111	74.439	0.214382
689	2.988	431.167	115	316.167	167.517	111	56.517	0.178757
690	2.839	448.222	115	333.222	150.942	111	39.942	0.119866
691	4.698	423.58	115	308.58	202.59	111	91.59	0.296811
692	10.459	579.086	115	464.086	166.744	111	55.744	0.120116
693	2.025	442.918	115	327.918	198.943	111	87.943	0.268186
694	9.695	536.596	115	421.596	214.437	111	103.437	0.245346
695	2.955	479.292	115	364.292	241.112	111	130.112	0.357164
696	5.063	514.197	115	399.197	251.548	111	140.548	0.352077
697	3.353	513.851	115	398.851	188.797	111	77.797	0.195053
698	4.233	599.71	115	484.71	169.471	111	58.471	0.120631
699	2.158	472.177	115	357.177	99.962	111	0	0
700	5.877	535.141	115	420.141	249.028	111	138.028	0.328528
701	2.324	430.543	115	315.543	132.857	111	21.857	0.0692679
702	4.615	593.317	115	478.317	211.845	111	100.845	0.210833
703	4.3	502.672	115	387.672	313.425	111	202.425	0.522155
704	4.1	604.595	115	489.595	229.862	111	118.862	0.242776
705	6.806	454.554	115	339.554	163.398	111	52.398	0.154314
706	9.429	502.812	115	387.812	167.46	111	56.46	0.145586
707	2.64	530.56	115	415.56	208.918	111	97.918	0.235629
708	2.573	638.768	115	523.768	289.49	111	178.49	0.340781
709	3.47	681.33	115	566.33	198.072	111	87.072	0.153748
710	5.395	559.929	115	444.929	203.332	111	92.332	0.207521
711	3.304	625.286	115	510.286	191.673	111	80.673	0.158094
712	2.44	491.558	115	376.558	281.66	111	170.66	0.45321
713	2.225	497.873	115	382.873	223.037	111	112.037	0.292622
714	2.208	536.586	115	421.586	240.323	111	129.323	0.306754
715	2.474	394.691	115	279.691	183.664	111	72.664	0.259801
716	2.042	434.634	115	319.634	145.098	111	34.098	0.106678
717	2.391	592.861	115	477.861	378.542	111	267.542	0.559874
718	6.657	531.673	115	416.673	192.965	111	81.965	0.196713
719	6.557	677.425	115	562.425	394.666	111	283.666	0.504362
720	2.955	380.618	115	265.618	152.685	111	41.685	0.156936
721	2.623	576.741	115	461.741	263.07	111	152.07	0.32934
722	2.075	549.736	115	434.736	286.848	111	175.848	0.404494
723	3.104	707.144	115	592.144	375.021	111	264.021	0.445873
724	4.316	601.304	115	486.304	313.692	111	202.692	0.416801
725	2.092	397.413	115	282.413	161.389	111	50.389	0.178423
726	2.191	633.159	115	518.159	167.462	111	56.462	0.108967
727	2.059	398.46	115	283.46	139.476	111	28.476	0.100459
728	3.602	533.645	115	418.645	157.429	111	46.429	0.110903
729	2.357	725.479	115	610.479	165.204	111	54.204	0.0887893
730	7.67	707.948	115	592.948	245.177	111	134.177	0.226288
731	4.532	784.15	115	669.15	266.579	111	155.579	0.232502
732	2.972	546.196	115	431.196	163.81	111	52.81	0.122473
733	2.042	564.423	115	449.423	201.715	111	90.715	0.201848
734	2.606	413.439	115	298.439	179.274	111	68.274	0.22877
735	6.69	601.707	115	486.707	346.328	111	235.328	0.483511
736	3.918	606.089	115	491.089	217.237	111	106.237	0.216329
737	6.176	579.653	115	464.653	431.352	111	320.352	0.689444
738	2.075	628.04	115	513.04	227.624	111	116.624	0.22732
739	4.532	589.183	115	474.183	438.868	111	327.868	0.691438
740	4.582	637.04	115	522.04	216.446	111	105.446	0.201988
741	2.855	507.977	115	392.977	257.488	111	146.488	0.372765
742	3.503	697.592	115	582.592	575.659	111	464.659	0.797572
743	2.025	546.639	115	431.639	128.107	111	17.107	0.0396327
744	3.503	528.649	115	413.649	213.886	111	102.886	0.248728
745	4.034	799.63	115	684.63	194.778	111	83.778	0.12237
746	3.204	423.855	115	308.855	184.15	111	73.15	0.236843
747	3.055	425.098	115	310.098	300.076	111	189.076	0.60973
748	5.246	804.253	115	689.253	391.228	111	280.228	0.406568
749	4.183	638.802	115	523.802	214.222	111	103.222	0.197063
750	3.984	644.062	115	529.062	279.167	111	168.167	0.317859
751	7.504	498.883	115	383.883	170.542	111	59.542	0.155105
752	3.802	579.223	115	464.223	206.039	111	95.039	0.204727
753	3.121	672.452	115	557.452	234.532	111	123.532	0.221601
754	2.64	495.805	115	380.805	268.799	111	157.799	0.414383
755	6.275	440.45	115	325.45	201.638	111	90.638	0.278501
756	2.739	765.679	115	650.679	266.127	111	155.127	0.238408
757	4.2	451.85	115	336.85	231.383	111	120.383	0.357379
758	5.097	820.684	115	705.684	366.502	111	255.502	0.362063
759	5.296	755.721	115	640.721	446.63	111	335.63	0.523832
760	8.5	921.859	115	806.859	168.062	111	57.062	0.0707212
761	2.225	544.881	115	429.881	202.463	111	91.463	0.212764
762	4.864	662.044	115	547.044	174.051	111	63.051	0.115258
763	5.329	656.389	115	541.389	236.651	111	125.651	0.23209
764	8.035	669.252	115	554.252	287.347	111	176.347	0.318171
765	8.334	759.978	115	644.978	375.353	111	264.353	0.409864
766	6.806	598.998	115	483.998	172.037	111	61.037	0.12611
767	6.391	701.595	115	586.595	433.514	111	322.514	0.549807
768	5.429	940.92	115	825.92	290.508	111	179.508	0.217343
769	4.067	672.649	115	557.649	369.273	111	258.273	0.463146
770	2.855	543.267	115	428.267	221.698	111	110.698	0.258479
771	2.839	730.573	115	615.573	304.175	111	193.175	0.313813
772	3.818	716.791	115	601.791	337.239	111	226.239	0.375943
773	5.246	516.127	115	401.127	189.883	111	78.883	0.196653
774	2.772	499.329	115	384.329	332.431	111	221.431	0.57615
775	2.457	633.669	115	518.669	315.953	111	204.953	0.395152
776	3.121	601.378	115	486.378	225.106	111	114.106	0.234604
777	11.189	435.067	115	320.067	151.905	111	40.905	0.127801
778	3.702	610.157	115	495.157	318.794	111	207.794	0.419653
779	2.789	702.065	115	587.065	481	111	370	0.630254
780	6.923	681.504	115	566.504	398.559	111	287.559	0.507603
781	5.047	582.789	115	467.789	282.905	111	171.905	0.367484
782	2.341	613.447	115	498.447	288.255	111	177.255	0.355615
783	12.384	627.503	115	512.503	267.678	111	156.678	0.305711
784	2.772	722.665	115	607.665	768.06	111	657.06	1.08129
785	2.092	501.976	115	386.976	190.04	111	79.04	0.20425
786	4.648	418.111	115	303.111	153.993	111	42.993	0.141839
787	5.478	443.306	115	328.306	223.479	111	112.479	0.342604
788	3.104	461.663	115	346.663	144.888	111	33.888	0.0977549
789	4.017	657.686	115	542.686	210.967	111	99.967	0.184208
790	3.619	630.775	115	515.775	222.954	111	111.954	0.21706
791	6.225	719.387	115	604.387	242.835	111	131.835	0.21813
792	2.955	692.961	115	577.961	508.792	111	397.792	0.688268
793	2.391	657.799	115	542.799	539.556	111	428.556	0.78953
794	5.279	752.371	115	637.371	432	111	321	0.503631
795	3.171	696.733	115	581.733	160.199	111	49.199	0.0845732
796	3.802	713.996	115	598.996	428.293	111	317.293	0.529708
797	5.08	738.601	115	623.601	500.297	111	389.297	0.624273
798	2.274	612.46	115	497.46	282.693	111	171.693	0.345139
799	5.08	571.761	115	456.761	244.859	111	133.859	0.293061
800	2.374	353.629	115	238.629	131.245	111	20.245	0.0848388
801	6.989	630.736	115	515.736	219.836	111	108.836	0.21103
802	4.814	468.766	115	353.766	204.162	111	93.162	0.263344
803	2.689	647.617	115	532.617	291.068	111	180.068	0.338082
804	3.984	574.625	115	459.625	140.137	111	29.137	0.063393
805	2.191	600.03	115	485.03	325.977	111	214.977	0.443224
806	8.068	631.309	115	516.309	299.37	111	188.37	0.36484
807	2.972	472.168	115	357.168	285.503	111	174.503	0.488574
808	3.403	471.015	115	356.015	211.366	111	100.366	0.281915
809	4.881	464.99	115	349.99	159.687	111	48.687	0.13911
810	3.519	617.132	115	502.132	342.146	111	231.146	0.460329
811	2.756	690.09	115	575.09	376.867	111	265.867	0.462305
812	3.337	567.786	115	452.786	423.418	111	312.418	0.68999
813	4.001	558.282	115	443.282	323.041	111	212.041	0.478343
814	3.553	666.383	115	551.383	186.902	111	75.902	0.137657
815	7.703	643.463	115	528.463	266.496	111	155.496	0.294242
816	3.387	690.108	115	575.108	376.382	111	265.382	0.461447
817	2.324	542.329	115	427.329	303.557	111	192.557	0.450606
818	2.739	410.515	115	295.515	170.127	111	59.127	0.200081
819	5.827	649.843	115	534.843	443.832	111	332.832	0.622299
820	4.084	544.045	115	429.045	209.837	111	98.837	0.230365
821	5.694	687.262	115	572.262	352.475	111	241.475	0.421966
822	4.499	563.292	115	448.292	243.144	111	132.144	0.294772
823	3.304	534.91	115	419.91	288.874	111	177.874	0.4236
824	5.014	425.626	115	310.626	143.748	111	32.748	0.105426
825	3.237	661.805	115	546.805	334.005	111	223.005	0.407833
826	3.021	514.78	115	399.78	181.676	111	70.676	0.176787
827	6.491	708.575	115	593.575	503.99	111	392.99	0.662073
828	2.391	545.889	115	430.889	291.153	111	180.153	0.418096
829	5.146	498.532	115	383.532	216.335	111	105.335	0.274645
830	3.486	583.49	115	468.49	198.452	111	87.452	0.186668
831	4.98	586.753	115	471.753	345.86	111	234.86	0.497845
832	10.774	652.675	115	537.675	317.812	111	206.812	0.384641
833	5.844	625.21	115	510.21	478.415	111	367.415	0.720125
834	3.984	509.658	115	394.658	165.871	111	54.871	0.139034
835	9.496	604.129	115	489.129	347.64	111	236.64	0.483799
836	4.001	502.44	115	387.44	215.274	111	104.274	0.269136
837	3.27	537.563	115	422.563	261.137	111	150.137	0.355301
838	4.997	633.143	115	518.143	235.249	111	124.249	0.239797
839	2.059	510.21	115	395.21	207.968	111	96.968	0.245358
840	2.142	397.752	115	282.752	155.605	111	44.605	0.157753
841	4.881	411.667	115	296.667	206.143	111	95.143	0.320706
842	2.889	455.977	115	340.977	149.506	111	38.506	0.112928
843	17.581	508.652	115	393.652	199.948	111	88.948	0.225956
844	7.72	537.785	115	422.785	206.314	111	95.314	0.225443
845	2.391	564.931	115	449.931	176.361	111	65.361	0.145269
846	4.897	456.739	115	341.739	193.539	111	82.539	0.241526
847	4.482	436.741	115	321.741	239.819	111	128.819	0.400381
848	5.03	598.389	115	483.389	278.584	111	167.584	0.346686
849	3.536	437.399	115	322.399	164.169	111	53.169	0.164917
850	2.341	568.39	115	453.39	187.27	111	76.27	0.168222
851	2.374	475.392	115	360.392	149.077	111	38.077	0.105654
852	3.702	451.7	115	336.7	192.377	111	81.377	0.24169
853	7.819	523.208	115	408.208	187.707	111	76.707	0.187912
854	5.528	503.994	115	388.994	222.961	111	111.961	0.287822
855	2.739	456.364	115	341.364	167.212	111	56.212	0.164669
856	2.158	372.7	115	257.7	153.392	111	42.392	0.164501
857	7.969	498.844	115	383.844	243.594	111	132.594	0.345437
858	3.204	463.694	115	348.694	198.409	111	87.409	0.250675
859	2.689	426.099	115	311.099	161.562	111	50.562	0.162527
860	3.901	425.14	115	310.14	207.345	111	96.345	0.31065
861	8.865	471.154	115	356.154	180.019	111	69.019	0.19379
862	3.868	500.867	115	385.867	194.485	111	83.485	0.216357
863	4.183	517.294	115	402.294	172.325	111	61.325	0.152438
864	3.403	476.668	115	361.668	219.434	111	108.434	0.299816
865	3.038	423.76	115	308.76	163.044	111	52.044	0.168558
866	2.523	368.066	115	253.066	142.388	111	31.388	0.124031
867	2.391	461.153	115	346.153	166.278	111	55.278	0.159692
868	4.814	485.886	115	370.886	242.234	111	131.234	0.353839
869	2.822	429.353	115	314.353	143.171	111	32.171	0.10234
870	2.872	471.936	115	356.936	129.445	111	18.445	0.0516759
871	3.104	430.123	115	315.123	156.802	111	45.802	0.145346
872	4.1	431.96	115	316.96	191.899	111	80.899	0.255234
873	5.545	440.877	115	325.877	261.195	111	150.195	0.460895
874	7.57	416.882	115	301.882	186.529	111	75.529	0.250194
875	5.595	451.151	115	336.151	154.104	111	43.104	0.128228
876	3.984	471.558	115	356.558	157.025	111	46.025	0.129081
877	6.292	426.805	115	311.805	173.536	111	62.536	0.200561
878	2.656	392.906	115	277.906	157.062	111	46.062	0.165747
879	7.039	444.469	115	329.469	145.038	111	34.038	0.103312
880	9.413	485.894	115	370.894	172.545	111	61.545	0.165937
881	5.644	459.956	115	344.956	173.662	111	62.662	0.181652
882	2.225	371.53	115	256.53	162.91	111	51.91	0.202355
883	2.407	401.366	115	286.366	136.945	111	25.945	0.0906008
884	2.806	413.953	115	298.953	143.278	111	32.278	0.10797
885	2.656	375.75	115	260.75	148.294	111	37.294	0.143026
886	13.912	444.578	115	329.578	206.986	111	95.986	0.291239
887	5.993	411.809	115	296.809	166.884	111	55.884	0.188283
888	2.756	411.97	115	296.97	164.861	111	53.861	0.181368
889	3.719	415.647	115	300.647	163.214	111	52.214	0.173672
890	2.158	438.523	115	323.523	143.477	111	32.477	0.100385
891	2.689	383.407	115	268.407	141.728	111	30.728	0.114483
892	2.108	427.74	115	312.74	184.362	111	73.362	0.234578
893	2.54	431.203	115	316.203	158.529	111	47.529	0.150312
894	3.453	461.812	115	346.812	244.053	111	133.053	0.383646
895	3.171	587.288	115	472.288	134.325	111	23.325	0.0493872
896	2.54	500.523	115	385.523	151.954	111	40.954	0.10623
897	3.586	464.245	115	349.245	185.551	111	74.551	0.213463
898	2.474	404.812	115	289.812	201.255	111	90.255	0.311426
899	6.076	537.134	115	422.134	250.978	111	139.978	0.331596
900	3.304	470.754	115	355.754	190.578	111	79.578	0.223688
901	2.922	531	115	416	190.614	111	79.614	0.19138
902	2.125	541.484	115	426.484	244.648	111	133.648	0.313372
903	2.988	622.361	115	507.361	207.139	111	96.139	0.189488
904	6.076	519.481	115	404.481	192.325	111	81.325	0.20106
905	4.1	502.931	115	387.931	232.024	111	121.024	0.311973
906	2.457	588.115	115	473.115	229.676	111	118.676	0.25084
907	3.171	390.749	115	275.749	138.309	111	27.309	0.0990357
908	2.175	389.557	115	274.557	131.901	111	20.901	0.0761263
909	3.337	486.622	115	371.622	182.731	111	71.731	0.193021
910	2.955	528.669	115	413.669	250.399	111	139.399	0.336982
911	4.25	618.434	115	503.434	149.262	111	38.262	0.076002
912	3.851	579.901	115	464.901	181.802	111	70.802	0.152295
913	2.839	459.825	115	344.825	162.064	111	51.064	0.148087
914	4.798	631.228	115	516.228	235.799	111	124.799	0.241752
915	2.806	561.888	115	446.888	194.716	111	83.716	0.187331
916	4.516	433.074	115	318.074	159.875	111	48.875	0.153659
917	8.467	631.155	115	516.155	225.035	111	114.035	0.220932
918	2.158	510.762	115	395.762	162.531	111	51.531	0.130207
919	2.108	527.945	115	412.945	201.409	111	90.409	0.218937
920	5.362	541.359	115	426.359	199.347	111	88.347	0.207213
921	2.606	540.274	115	425.274	365.439	111	254.439	0.598294
922	2.922	412.801	115	297.801	177.114	111	66.114	0.222007
923	2.922	562.409	115	447.409	215.659	111	104.659	0.233922
924	3.752	447.863	115	332.863	229.376	111	118.376	0.35563
925	7.471	600.107	115	485.107	257.429	111	146.429	0.301849
926	5.794	692.914	115	577.914	168.264	111	57.264	0.0990874
927	3.254	550.286	115	435.286	114.781	111	3.781	0.00868624
928	2.291	531.797	115	416.797	197.246	111	86.246	0.206926
929	4.1	561.024	115	446.024	216.984	111	105.984	0.23762
930	9.014	634.085	115	519.085	235.941	111	124.941	0.240695
931	5.81	667.817	115	552.817	297.537	111	186.537	0.33743
932	2.673	469.963	115	354.963	314.18	111	203.18	0.572398
933	2.175	572.214	115	457.214	112.802	111	1.802	0.00394126
934	2.042	585.846	115	470.846	370.65	111	259.65	0.551454
935	4.682	661.507	115	546.507	302.152	111	191.152	0.34977
936	3.702	704.915	115	589.915	312.17	111	201.17	0.341015
937	2.523	580.007	115	465.007	145.914	111	34.914	0.0750827
938	2.341	662.227	115	547.227	143.184	111	32.184	0.0588129
939	2.739	593.636	115	478.636	273.085	111	162.085	0.338639
940	3.47	551.416	115	436.416	154.024	111	43.024	0.0985848
941	4.532	556.018	115	441.018	280.088	111	169.088	0.383404
942	2.142	756.132	115	641.132	267.636	111	156.636	0.244312
943	2.756	448.367	115	333.367	219.054	111	108.054	0.324129
944	3.968	656.322	115	541.322	348.837	111	237.837	0.439363
945	4.648	563.632	115	448.632	187.043	111	76.043	0.1695
946	2.474	550.128	115	435.128	228.067	111	117.067	0.26904
947	2.457	428.061	115	313.061	143.385	111	32.385	0.103446
948	4.532	610.495	115	495.495	330.864	111	219.864	0.443726
949	4.466	405.892	115	290.892	134.874	111	23.874	0.0820717
950	6.176	562.218	115	447.218	197.341	111	86.341	0.193062
951	5.943	634.774	115	519.774	279.52	111	168.52	0.324218
952	2.49	689.433	115	574.433	273.88	111	162.88	0.283549
953	3.934	620.422	115	505.422	307.608	111	196.608	0.388998
954	9.479	619.231	115	504.231	220.448	111	109.448	0.217059
955	3.387	573.662	115	458.662	244.451	111	133.451	0.290957
956	4.217	505.878	115	390.878	150.839	111	39.839	0.101922
957	2.606	680.019	115	565.019	239.86	111	128.86	0.228063
958	6.607	562.427	115	447.427	276.193	111	165.193	0.369207
959	2.108	614.724	115	499.724	550.071	111	439.071	0.878627
960	9.081	735.382	115	620.382	243.898	111	132.898	0.21422
961	8.699	663.019	115	548.019	311.023	111	200.023	0.364993
962	3.602	554.323	115	439.323	176.484	111	65.484	0.149057
963	6.939	711.089	115	596.089	416.897	111	305.897	0.513173
964	9.396	765.926	115	650.926	458.071	111	347.071	0.533196
965	13.596	700.344	115	585.344	230.532	111	119.532	0.204208
966	5.777	753.989	115	638.989	339.092	111	228.092	0.356958
967	2.889	602.075	115	487.075	275.052	111	164.052	0.336811
968	4.715	684.835	115	569.835	306.018	111	195.018	0.342236
969	4.333	593.272	115	478.272	228.004	111	117.004	0.244639
970	6.591	470.846	115	355.846	137.285	111	26.285	0.0738662
971	4.466	630.413	115	515.413	278.312	111	167.312	0.324617
972	2.573	413.252	115	298.252	188.323	111	77.323	0.259254
973	2.357	426.042	115	311.042	134.873	111	23.873	0.0767517
974	4.35	726.492	115	611.492	202.309	111	91.309	0.149322
975	5.943	593.799	115	478.799	214.961	111	103.961	0.217129
976	3.735	582.169	115	467.169	185.56	111	74.56	0.1596
977	4.549	726.496	115	611.496	331.602	111	220.602	0.360758
978	5.445	433.18	115	318.18	211.177	111	100.177	0.314844
979	4.35	502.653	115	387.653	193.431	111	82.431	0.212641
980	6.059	608.022	115	493.022	221.441	111	110.441	0.224008
981	4.25	630.617	115	515.617	246.535	111	135.535	0.26286
982	2.208	538.617	115	423.617	336.331	111	225.331	0.531922
983	2.756	407.633	115	292.633	147.602	111	36.602	0.125078
984	3.27	619.421	115	504.421	263.777	111	152.777	0.302876
985	5.312	502.291	115	387.291	166.719	111	55.719	0.143869
986	2.872	722.52	115	607.52	260.04	111	149.04	0.245325
987	4.864	496.232	115	381.232	228.068	111	117.068	0.307078
988	5.678	564.225	115	449.225	274.564	111	163.564	0.364103
989	5.694	686.184	115	571.184	283.481	111	172.481	0.301971
990	4.599	669.343	115	554.343	460.108	111	349.108	0.629769
991	10.807	655.708	115	540.708	361.24	111	250.24	0.462801
992	2.523	674.408	115	559.408	414.704	111	303.704	0.542902
993	2.175	774.649	115	659.649	328.305	111	217.305	0.329425
994	6.159	718.186	115	603.186	351.644	111	240.644	0.398955
995	2.557	666.532	115	551.532	175.461	111	64.461	0.116876
996	5.014	723.338	115	608.338	482.838	111	371.838	0.611236
997	2.855	406.587	115	291.587	145.355	111	34.355	0.117821
998	8.566	817.531	115	702.531	635.211	111	524.211	0.746175
999	2.822	627.371	115	512.371	291.182	111	180.182	0.351663
1000	2.623	753.316	115	638.316	444.791	111	333.791	0.522924
1001	3.835	505.952	115	390.952	226.139	111	115.139	0.294509
1002	7.089	641.098	115	526.098	218.869	111	107.869	0.205036
1003	5.346	761.842	115	646.842	247.236	111	136.236	0.210617
1004	4.499	695.661	115	580.661	265.085	111	154.085	0.265361
1005	2.64	468.679	115	353.679	146.182	111	35.182	0.0994744
1006	3.818	759.448	115	644.448	323.317	111	212.317	0.329456
1007	2.822	684.871	115	569.871	239.371	111	128.371	0.225263
1008	4.383	782.417	115	667.417	283.902	111	172.902	0.259061
1009	3.47	774.354	115	659.354	444.34	111	333.34	0.505555
1010	6.375	650.216	115	535.216	228.562	111	117.562	0.219653
1011	3.503	632.891	115	517.891	241.076	111	130.076	0.251165
1012	2.191	594.72	115	479.72	270.523	111	159.523	0.332534
1013	2.889	667.471	115	552.471	192.408	111	81.408	0.147353
1014	2.391	533.708	115	418.708	270.681	111	159.681	0.381366
1015	4.632	557.602	115	442.602	176.939	111	65.939	0.14898
1016	2.706	619.025	115	504.025	377.693	111	266.693	0.529127
1017	4.35	410.317	115	295.317	219.691	111	108.691	0.368049
1018	5.213	627.697	115	512.697	315.067	111	204.067	0.398027
1019	2.241	532.904	115	417.904	288.193	111	177.193	0.424004
1020	3.237	793.287	115	678.287	394.421	111	283.421	0.417848
1021	6.524	743.692	115	628.692	274.043	111	163.043	0.259337
1022	4.682	586.546	115	471.546	339.039	111	228.039	0.483599
1023	2.573	574.981	115	459.981	333.129	111	222.129	0.482909
1024	2.042	674.041	115	559.041	269.846	111	158.846	0.28414
1025	3.287	656.338	115	541.338	161.687	111	50.687	0.0936328
1026	5.694	490.831	115	375.831	198.746	111	87.746	0.233472
1027	3.569	722.419	115	607.419	540.005	111	429.005	0.706275
1028	5.661	705.821	115	590.821	251.023	111	140.023	0.236997
1029	4.333	571.069	115	456.069	203.375	111	92.375	0.202546
1030	2.938	555.136	115	440.136	195.582	111	84.582	0.192172
1031	2.656	771.106	115	656.106	849.237	111	738.237	1.12518
1032	4.765	430.341	115	315.341	152.666	111	41.666	0.13213
1033	2.739	384.745	115	269.745	198.255	111	87.255	0.323472
1034	15.555	687.448	115	572.448	361.915	111	250.915	0.438319
1035	4.117	710.238	115	595.238	515.496	111	404.496	0.679553
1036	3.42	444.811	115	329.811	166.602	111	55.602	0.168587
1037	8.035	487.529	115	372.529	206.205	111	95.205	0.255564
1038	3.636	712.192	115	597.192	188.393	111	77.393	0.129595
1039	2.806	767.811	115	652.811	531.296	111	420.296	0.643825
1040	2.092	679.079	115	564.079	233.19	111	122.19	0.216619
1041	4.017	740.434	115	625.434	348.174	111	237.174	0.379215
1042	2.391	591.59	115	476.59	236.41	111	125.41	0.26314
1043	2.938	582.644	115	467.644	336.102	111	225.102	0.481353
1044	3.602	632.415	115	517.415	270.871	111	159.871	0.30898
1045	4.399	645.272	115	530.272	335.132	111	224.132	0.422674
1046	6.391	625.068	115	510.068	227.052	111	116.052	0.227523
1047	4.698	660.565	115	545.565	381.721	111	270.721	0.496221
1048	5.661	739.059	115	624.059	430.965	111	319.965	0.512716
1049	4.516	740.386	115	625.386	544.224	111	433.224	0.692731
1050	2.191	498.992	115	383.992	192.811	111	81.811	0.213054
1051	5.595	752.199	115	637.199	362.027	111	251.027	0.393954
1052	2.258	470.426	115	355.426	137.235	111	26.235	0.0738128
1053	3.752	583.788	115	468.788	303.912	111	192.912	0.411512
1054	4.2	399.759	115	284.759	186.941	111	75.941	0.266685
1055	2.573	477.265	115	362.265	212.877	111	101.877	0.281222
1056	4.183	757.718	115	642.718	204.548	111	93.548	0.145551
1057	2.772	631.012	115	516.012	154.581	111	43.581	0.0844573
1058	3.37	481.517	115	366.517	182.64	111	71.64	0.195462
1059	2.523	583.007	115	468.007	230.039	111	119.039	0.254353
1060	4.765	443.871	115	328.871	151.676	111	40.676	0.123684
1061	15.173	599.796	115	484.796	262.602	111	151.602	0.312713
1062	5.794	700.074	115	585.074	166.774	111	55.774	0.0953281
1063	4.549	695.066	115	580.066	549.281	111	438.281	0.755571
1064	4.017	518.393	115	403.393	241.888	111	130.888	0.324468
1065	3.569	501.349	115	386.349	144.256	111	33.256	0.0860776
1066	2.009	363.727	115	248.727	137.397	111	26.397	0.106128
1067	6.242	535.963	115	420.963	173.878	111	62.878	0.149367
1068	2.059	661.629	115	546.629	226.589	111	115.589	0.211458
1069	3.785	489.386	115	374.386	204.921	111	93.921	0.250867
1070	3.818	535.539	115	420.539	156.457	111	45.457	0.108092
1071	7.288	406.412	115	291.412	207.565	111	96.565	0.331369
1072	2.175	550.137	115	435.137	568.328	111	457.328	1.051
1073	10.376	632.658	115	517.658	324.778	111	213.778	0.412971
1074	3.851	418.487	115	303.487	146.591	111	35.591	0.117274
1075	4.964	454.09	115	339.09	203.582	111	92.582	0.273031
1076	2.44	473.762	115	358.762	158.932	111	47.932	0.133604
1077	3.802	662.886	115	547.886	228.751	111	117.751	0.214919
1078	3.984	492.033	115	377.033	141.342	111	30.342	0.0804757
1079	3.785	510.759	115	395.759	191.184	111	80.184	0.202608
1080	3.47	646.22	115	531.22	298.718	111	187.718	0.353371
1081	7.122	586.965	115	471.965	295.427	111	184.427	0.390764
1082	3.387	587.73	115	472.73	184.299	111	73.299	0.155055
1083	4.897	532.2	115	417.2	326.407	111	215.407	0.516316
1084	5.893	453.358	115	338.358	199.882	111	88.882	0.262686
1085	2.357	652.19	115	537.19	199.789	111	88.789	0.165284
1086	2.075	433.512	115	318.512	153.248	111	42.248	0.132642
1087	5.512	585.982	115	470.982	147.87	111	36.87	0.0782832
1088	4.482	440.278	115	325.278	203.285	111	92.285	0.283711
1089	4.964	465.488	115	350.488	199.331	111	88.331	0.252023
1090	8.201	604.686	115	489.686	246.468	111	135.468	0.276643
1091	2.955	461.652	115	346.652	199.309	111	88.309	0.254748
1092	7.354	589.194	115	474.194	269.578	111	158.578	0.334416
1093	2.208	566.677	115	451.677	122.782	111	11.782	0.026085
1094	3.038	448.634	115	333.634	230.481	111	119.481	0.35812
1095	6.474	444.677	115	329.677	224.518	111	113.518	0.344331
1096	3.735	547.062	115	432.062	240.022	111	129.022	0.298619
1097	5.362	492.997	115	377.997	268.929	111	157.929	0.417805
1098	4.399	522.121	115	407.121	185.54	111	74.54	0.183091
1099	3.088	511.016	115	396.016	159.785	111	48.785	0.123189
1100	3.685	378.955	115	263.955	169.036	111	58.036	0.219871
1101	4.167	537.474	115	422.474	169.57	111	58.57	0.138636
1102	2.955	528.399	115	413.399	193.331	111	82.331	0.199156
1103	4.466	494.792	115	379.792	196.74	111	85.74	0.225755
1104	8.666	556.339	115	441.339	263.006	111	152.006	0.34442
1105	3.519	435.821	115	320.821	180.887	111	69.887	0.217838
1106	5.429	518.532	115	403.532	164.404	111	53.404	0.132341
1107	4.034	408.679	115	293.679	157.675	111	46.675	0.158932
1108	3.951	493.643	115	378.643	218.294	111	107.294	0.283365
1109	2.158	451.769	115	336.769	286.531	111	175.531	0.521221
1110	3.221	460.851	115	345.851	172.381	111	61.381	0.177478
1111	2.772	451.054	115	336.054	203.287	111	92.287	0.27462
1112	2.125	363.227	115	248.227	140.367	111	29.367	0.118307
1113	6.74	443.633	115	328.633	192.076	111	81.076	0.246707
1114	4.582	477.145	115	362.145	177.764	111	66.764	0.184357
1115	3.934	424.831	115	309.831	286.063	111	175.063	0.565027
1116	4.864	511.324	115	396.324	178.884	111	67.884	0.171284
1117	2.523	492.513	115	377.513	235.375	111	124.375	0.329459
1118	2.739	406.424	115	291.424	224.073	111	113.073	0.388002
1119	3.868	477.442	115	362.442	188.906	111	77.906	0.214947
1120	9.546	421.125	115	306.125	178.548	111	67.548	0.220655
1121	2.756	401.717	115	286.717	139.976	111	28.976	0.101061
1122	3.619	474.344	115	359.344	191.619	111	80.619	0.22435
1123	5.13	497.353	115	382.353	140.291	111	29.291	0.0766072
1124	2.391	447.382	115	332.382	134.194	111	23.194	0.0697812
1125	2.142	414.357	115	299.357	257.209	111	146.209	0.48841
1126	2.025	427.738	115	312.738	154.254	111	43.254	0.138307
1127	2.424	367.068	115	252.068	152.521	111	41.521	0.164721
1128	3.071	408.697	115	293.697	213.784	111	102.784	0.349966
1129	3.32	411.165	115	296.165	181.655	111	70.655	0.238566
1130	2.009	187.9	103	84.9	152.85	114	38.85	0.457597
1131	2.009	194.558	103	91.558	124.375	114	10.375	0.113316
1132	2.009	196.583	103	93.583	132.9	114	18.9	0.20196
1133	2.026	196.975	103	93.975	133.959	114	19.959	0.212386
1134	2.109	193.635	103	90.635	118.889	114	4.889	0.0539416
1135	2.159	189.612	103	86.612	127.31	114	13.31	0.153674
1136	2.193	170.672	103	67.672	132	114	18	0.265989
1137	2.26	187.859	103	84.859	110.652	114	0	0
1138	2.277	197.529	103	94.529	123.287	114	9.287	0.098245
1139	2.31	181.92	103	78.92	129.341	114	15.341	0.194387
1140	2.31	195.326	103	92.326	117.696	114	3.696	0.0400321
1141	2.31	182.703	103	79.703	119.543	114	5.543	0.0695457
1142	2.31	180.841	103	77.841	135.036	114	21.036	0.270243
1143	2.377	195.852	103	92.852	153.451	114	39.451	0.42488
1144	2.377	183.993	103	80.993	169.437	114	55.437	0.684467
1145	2.427	204.814	103	101.814	152.752	114	38.752	0.380616
1146	2.427	187.166	103	84.166	149.917	114	35.917	0.42674
1147	2.444	181.932	103	78.932	133.747	114	19.747	0.250177
1148	2.444	176.103	103	73.103	116.993	114	2.993	0.0409422
1149	2.461	171.272	103	68.272	139.306	114	25.306	0.370664
1150	2.478	196.696	103	93.696	133.074	114	19.074	0.203573
1151	2.494	171.477	103	68.477	137.228	114	23.228	0.339209
1152	2.494	183.161	103	80.161	124.718	114	10.718	0.133706
1153	2.511	185.44	103	82.44	113.453	114	0	0
1154	2.561	184.477	103	81.477	126.954	114	12.954	0.15899
1155	2.578	175.688	103	72.688	126.571	114	12.571	0.172945
1156	2.578	198.864	103	95.864	149.578	114	35.578	0.37113
1157	2.578	195.221	103	92.221	185.104	114	71.104	0.771017
1158	2.611	188.763	103	85.763	196.532	114	82.532	0.962326
1159	2.662	200.503	103	97.503	133.667	114	19.667	0.201707
1160	2.695	193.919	103	90.919	148.733	114	34.733	0.382021
1161	2.779	200.964	103	97.964	133	114	19	0.193949
1162	2.796	181.473	103	78.473	110.862	114	0	0
1163	2.812	177.952	103	74.952	125.423	114	11.423	0.152404
1164	2.812	195.631	103	92.631	119.19	114	5.19	0.0560288
1165	2.93	199.023	103	96.023	136.754	114	22.754	0.236964
1166	3.013	189.356	103	86.356	114.856	114	0.856	0.00991246
1167	3.08	194.207	103	91.207	115.005	114	1.005	0.0110189
1168	3.097	181.616	103	78.616	121.849	114	7.849	0.0998397
1169	3.114	197.532	103	94.532	135.425	114	21.425	0.226643
1170	3.114	189.672	103	86.672	124.419	114	10.419	0.120212
1171	3.114	158.527	103	55.527	110.984	114	0	0
1172	3.13	186.449	103	83.449	137.235	114	23.235	0.278434
1173	3.13	155.38	103	52.38	116.631	114	2.631	0.0502291
1174	3.181	176.942	103	73.942	110.695	114	0	0
1175	3.264	201.021	103	98.021	131	114	17	0.173432
1176	3.348	172.22	103	69.22	115.43	114	1.43	0.0206588
1177	3.365	194.219	103	91.219	128.92	114	14.92	0.163562
1178	3.382	166.396	103	63.396	134.678	114	20.678	0.326172
1179	3.382	192.609	103	89.609	129.198	114	15.198	0.169603
1180	3.415	212.451	103	109.451	137.554	114	23.554	0.215201
1181	3.549	182.382	103	79.382	121.17	114	7.17	0.0903227
1182	3.566	176.967	103	73.967	116.437	114	2.437	0.0329471
1183	3.599	190.87	103	87.87	129.628	114	15.628	0.177854
1184	3.633	197.442	103	94.442	133.788	114	19.788	0.209525
1185	3.633	197.475	103	94.475	126.392	114	12.392	0.131167
1186	3.633	193.525	103	90.525	142.198	114	28.198	0.311494
1187	3.7	171.701	103	68.701	110.072	114	0	0
1188	3.75	192.232	103	89.232	161.621	114	47.621	0.533676
1189	3.75	182.964	103	79.964	150.763	114	36.763	0.459744
1190	3.783	182.124	103	79.124	130.951	114	16.951	0.214233
1191	3.817	193.417	103	90.417	118.693	114	4.693	0.051904
1192	3.834	174.306	103	71.306	132.004	114	18.004	0.252489
1193	3.9	178.318	103	75.318	118.391	114	4.391	0.0582995
1194	3.967	202.287	103	99.287	128.473	114	14.473	0.145769
1195	4.001	198.464	103	95.464	129.682	114	15.682	0.164271
1196	4.068	174.193	103	71.193	120.325	114	6.325	0.088843
1197	4.118	200.911	103	97.911	197.512	114	83.512	0.852938
1198	4.152	173.085	103	70.085	126.613	114	12.613	0.179967
1199	4.269	187.808	103	84.808	128.016	114	14.016	0.165267
1200	4.269	198.808	103	95.808	131.118	114	17.118	0.17867
1201	4.286	200.805	103	97.805	126.457	114	12.457	0.127366
1202	4.419	198.451	103	95.451	136.943	114	22.943	0.240364
1203	4.503	189.216	103	86.216	139.77	114	25.77	0.2989
1204	4.503	191.543	103	88.543	122.74	114	8.74	0.0987091
1205	4.737	210.615	103	107.615	125.413	114	11.413	0.106054
1206	4.737	163.943	103	60.943	124.028	114	10.028	0.164547
1207	4.838	163.097	103	60.097	123.118	114	9.118	0.151721
1208	4.905	201.413	103	98.413	123.86	114	9.86	0.10019
1209	4.972	204.391	103	101.391	138.178	114	24.178	0.238463
1210	4.972	154.205	103	51.205	113.929	114	0	0
1211	5.005	168.719	103	65.719	116.174	114	2.174	0.0330802
1212	5.039	184.997	103	81.997	141.492	114	27.492	0.335281
1213	5.123	196.562	103	93.562	128.719	114	14.719	0.157318
1214	5.139	182.124	103	79.124	126.208	114	12.208	0.154289
1215	5.29	183.418	103	80.418	114.13	114	0.13	0.00161655
1216	5.692	197.515	103	94.515	119.159	114	5.159	0.0545839
1217	5.708	194.49	103	91.49	122.167	114	8.167	0.0892666
1218	5.725	224.155	103	121.155	169.053	114	55.053	0.454401
1219	6.043	199.693	103	96.693	133.537	114	19.537	0.202052
1220	6.144	171.894	103	68.894	115.599	114	1.599	0.0232096
1221	6.227	209.022	103	106.022	132.508	114	18.508	0.174568
1222	6.311	191.711	103	88.711	143.626	114	29.626	0.333961
1223	6.345	198.976	103	95.976	141.303	114	27.303	0.284477
1224	6.562	177.929	103	74.929	120.077	114	6.077	0.0811034
1225	6.663	163.867	103	60.867	110.121	114	0	0
1226	6.964	209.974	103	106.974	137.856	114	23.856	0.223007
1227	7.048	171.572	103	68.572	113.587	114	0	0
1228	7.232	204.19	103	101.19	143.387	114	29.387	0.290414
1229	7.583	191.366	103	88.366	121.907	114	7.907	0.0894801
1230	8.002	190.293	103	87.293	133.379	114	19.379	0.221999
1231	8.621	194.831	103	91.831	126.491	114	12.491	0.136022
1232	9.308	200.128	103	97.128	142.228	114	28.228	0.290627
1233	13.509	176.021	103	73.021	127.796	114	13.796	0.188932

## Sheet: augmin + gTuRC
Microtubule	Area (um^2)	Mean TB intensity	Alexa568 background intensity	Mean minus background	Mean gTuRC intensity	Alexa647 background intensity	Mean minus background	gTuRC/TB intensity
1	2.988	459.739	112	347.739	188.322	110	78.322	0.225232
2	2.54	452.817	112	340.817	210.902	110	100.902	0.296059
3	2.623	521.709	112	409.709	143.614	110	33.614	0.0820436
4	2.889	505.201	112	393.201	237	110	127	0.32299
5	2.308	640.734	112	528.734	215.194	110	105.194	0.198954
6	2.225	522.53	112	410.53	328.44	110	218.44	0.532093
7	2.191	475.5	112	363.5	208.962	110	98.962	0.272248
8	2.855	517.343	112	405.343	179.198	110	69.198	0.170715
9	4.997	579.322	112	467.322	293.86	110	183.86	0.393433
10	2.042	550.211	112	438.211	149.195	110	39.195	0.0894432
11	5.296	562.367	112	450.367	244.987	110	134.987	0.299727
12	2.158	671.177	112	559.177	238.808	110	128.808	0.230353
13	2.64	495.314	112	383.314	204.063	110	94.063	0.245394
14	2.756	622.102	112	510.102	326.572	110	216.572	0.424566
15	2.009	402.785	112	290.785	187.702	110	77.702	0.267215
16	9.512	684.726	112	572.726	222.593	110	112.593	0.196591
17	5.379	677.457	112	565.457	210.698	110	100.698	0.178083
18	4.25	576.473	112	464.473	266.621	110	156.621	0.337202
19	11.222	711.053	112	599.053	383.108	110	273.108	0.4559
20	2.175	679.939	112	567.939	253.733	110	143.733	0.253078
21	5.379	569.306	112	457.306	291.907	110	181.907	0.39778
22	7.022	679.156	112	567.156	375.57	110	265.57	0.468249
23	5.893	703.592	112	591.592	353.901	110	243.901	0.412279
24	2.656	689.131	112	577.131	326.131	110	216.131	0.374492
25	2.125	577.297	112	465.297	344.484	110	234.484	0.503945
26	5.113	637.166	112	525.166	219.179	110	109.179	0.207894
27	3.885	667.765	112	555.765	344.889	110	234.889	0.422641
28	4.582	738.018	112	626.018	387.047	110	277.047	0.442554
29	2.424	441.178	112	329.178	135.815	110	25.815	0.0784226
30	3.27	700.523	112	588.523	455.381	110	345.381	0.586861
31	6.375	664.294	112	552.294	304.539	110	194.539	0.352238
32	3.735	894.516	112	782.516	378	110	268	0.342485
33	2.756	585.867	112	473.867	224.139	110	114.139	0.240867
34	4.001	571.124	112	459.124	289.938	110	179.938	0.391916
35	2.988	691.661	112	579.661	401.606	110	291.606	0.503063
36	5.146	764.316	112	652.316	469.613	110	359.613	0.551286
37	4.549	672.069	112	560.069	301.179	110	191.179	0.341349
38	2.391	726.639	112	614.639	312.924	110	202.924	0.330152
39	5.395	874.969	112	762.969	274.966	110	164.966	0.216216
40	3.021	775.264	112	663.264	445.945	110	335.945	0.506503
41	3.851	862.741	112	750.741	361.832	110	251.832	0.335445
42	3.204	816.083	112	704.083	350.026	110	240.026	0.340906
43	3.851	790.772	112	678.772	220.625	110	110.625	0.162978
44	2.108	483.094	112	371.094	213.087	110	103.087	0.277792
45	2.739	725.339	112	613.339	322.248	110	212.248	0.346053
46	2.009	632.372	112	520.372	611.876	110	501.876	0.964456
47	5.445	613.942	112	501.942	238.381	110	128.381	0.255769
48	2.059	738.645	112	626.645	248.024	110	138.024	0.220259
49	4.831	907.344	112	795.344	430.887	110	320.887	0.403457
50	3.968	754.109	112	642.109	466.72	110	356.72	0.555544
51	2.241	759.504	112	647.504	495.444	110	385.444	0.595277
52	2.806	465.988	112	353.988	192.592	110	82.592	0.233319
53	2.258	653.441	112	541.441	427.993	110	317.993	0.587309
54	2.258	835.618	112	723.618	292.779	110	182.779	0.25259
55	2.573	874.458	112	762.458	479.69	110	369.69	0.484866
56	3.486	563.324	112	451.324	277.505	110	167.505	0.371141
57	6.939	677.811	112	565.811	271.517	110	161.517	0.285461
58	3.785	832.241	112	720.241	356.259	110	246.259	0.341912
59	2.689	794.988	112	682.988	573.253	110	463.253	0.678274
60	2.772	701.461	112	589.461	267.683	110	157.683	0.267504
61	3.486	842.229	112	730.229	551.838	110	441.838	0.605068
62	9.645	997.091	112	885.091	431.088	110	321.088	0.362774
63	4.183	818.25	112	706.25	635.877	110	525.877	0.744605
64	4.881	864.609	112	752.609	349.81	110	239.81	0.318638
65	3.254	941	112	829	556.597	110	446.597	0.538718
66	2.357	518.69	112	406.69	274.894	110	164.894	0.405454
67	5.96	688.173	112	576.173	232.886	110	122.886	0.21328
68	2.208	867.165	112	755.165	680.429	110	570.429	0.75537
69	2.042	770.285	112	658.285	910.374	110	800.374	1.21585
70	3.885	773.876	112	661.876	268.944	110	158.944	0.240142
71	6.076	876.29	112	764.29	476.945	110	366.945	0.480112
72	3.735	521.36	112	409.36	241.444	110	131.444	0.321096
73	4.466	918.193	112	806.193	206.829	110	96.829	0.120106
74	2.507	472.921	112	360.921	201.543	110	91.543	0.253637
75	3.121	924.362	112	812.362	418.92	110	308.92	0.380274
76	2.59	800.045	112	688.045	458.34	110	348.34	0.506275
77	2.059	661.395	112	549.395	152.524	110	42.524	0.0774015
78	3.171	899.105	112	787.105	252.785	110	142.785	0.181405
79	5.827	844.892	112	732.892	379.781	110	269.781	0.368105
80	7.487	1013.58	112	901.579	689.33	110	579.33	0.642573
81	3.453	877.38	112	765.38	362.635	110	252.635	0.330078
82	2.042	514.008	112	402.008	199.154	110	89.154	0.221772
83	2.59	1001.88	112	889.878	667.083	110	557.083	0.626022
84	2.474	894.463	112	782.463	551.577	110	441.577	0.564342
85	4.217	801.52	112	689.52	314.256	110	204.256	0.296229
86	3.104	529.332	112	417.332	167.775	110	57.775	0.138439
87	2.241	683.681	112	571.681	285.207	110	175.207	0.306477
88	3.187	980.667	112	868.667	713.615	110	603.615	0.694875
89	2.673	749.857	112	637.857	221.54	110	111.54	0.174867
90	2.938	507.35	112	395.35	221.362	110	111.362	0.28168
91	2.955	544.365	112	432.365	287.107	110	177.107	0.409624
92	2.324	649.243	112	537.243	210.893	110	100.893	0.187798
93	2.059	846.726	112	734.726	408.081	110	298.081	0.405704
94	3.353	913.965	112	801.965	473.743	110	363.743	0.453565
95	2.009	480.256	112	368.256	172.884	110	62.884	0.170762
96	3.868	450.931	112	338.931	158.06	110	48.06	0.141799
97	6.109	917.024	112	805.024	767.043	110	657.043	0.816178
98	2.507	927.947	112	815.947	503.722	110	393.722	0.482534
99	2.44	640.605	112	528.605	261.558	110	151.558	0.286713
100	2.507	733.02	112	621.02	191.212	110	81.212	0.130772
101	2.573	938.942	112	826.942	816.606	110	706.606	0.854481
102	2.54	1189.18	112	1077.18	694.15	110	584.15	0.542294
103	2.507	751.894	112	639.894	401	110	291	0.454763
104	2.689	850.858	112	738.858	462.938	110	352.938	0.47768
105	3.387	1042.22	112	930.225	466.196	110	356.196	0.382914
106	5.395	922.889	112	810.889	443.683	110	333.683	0.411503
107	2.059	951.976	112	839.976	327.516	110	217.516	0.258955
108	3.702	1041.26	112	929.256	737.148	110	627.148	0.674893
109	4.051	1022.26	112	910.258	448.168	110	338.168	0.371508
110	5.047	854.217	112	742.217	594.22	110	484.22	0.652397
111	2.756	626.614	112	514.614	214.223	110	104.223	0.202527
112	4.001	1009.86	112	897.863	881.012	110	771.012	0.858719
113	2.225	1046.56	112	934.56	583.388	110	473.388	0.506536
114	2.025	1201.66	112	1089.66	307.369	110	197.369	0.18113
115	2.059	787.048	112	675.048	502.129	110	392.129	0.580891
116	2.175	847.786	112	735.786	587.618	110	477.618	0.649126
117	7.454	1090.71	112	978.713	779.448	110	669.448	0.684008
118	3.586	679.829	112	567.829	233.56	110	123.56	0.217601
119	2.806	600.834	112	488.834	205.722	110	95.722	0.195817
120	6.126	1048.29	112	936.287	814.664	110	704.664	0.752615
121	3.37	648.34	112	536.34	335.074	110	225.074	0.419648
122	3.42	1021.85	112	909.854	857.995	110	747.995	0.822104
123	2.855	684.721	112	572.721	418.802	110	308.802	0.539184
124	3.353	922.683	112	810.683	599.817	110	489.817	0.604203
125	2.158	1015.87	112	903.869	893.754	110	783.754	0.86711
126	3.27	1143.1	112	1031.1	1134.34	110	1024.34	0.993448
127	3.088	734.452	112	622.452	688.28	110	578.28	0.929035
128	4.316	567	112	455	367.181	110	257.181	0.565233
129	3.802	999.803	112	887.803	674.782	110	564.782	0.636157
130	2.291	943.79	112	831.79	556.08	110	446.08	0.536289
131	3.885	856.201	112	744.201	575.991	110	465.991	0.626163
132	3.138	1046.29	112	934.286	282.286	110	172.286	0.184404
133	3.37	708.837	112	596.837	737.059	110	627.059	1.05064
134	2.606	748.987	112	636.987	629.172	110	519.172	0.815043
135	3.254	757.077	112	645.077	503.99	110	393.99	0.610764
136	3.204	975.254	112	863.254	873.565	110	763.565	0.88452
137	2.922	1084.49	112	972.494	651.057	110	541.057	0.55636
138	4.416	650.38	112	538.38	272.485	110	162.485	0.301804
139	2.191	612.167	112	500.167	209.136	110	99.136	0.198206
140	2.739	850.358	112	738.358	425.685	110	315.685	0.42755
141	2.64	1066.72	112	954.717	819.308	110	709.308	0.742951
142	6.259	1160.47	112	1048.47	957.947	110	847.947	0.808748
143	4.051	1022.69	112	910.693	464.533	110	354.533	0.3893
144	2.208	551.429	112	439.429	260.977	110	150.977	0.343575
145	2.407	996	112	884	1771.8	110	1661.8	1.87986
146	2.108	925.244	112	813.244	625.606	110	515.606	0.634011
147	5.346	892.419	112	780.419	394.82	110	284.82	0.364958
148	3.835	918.407	112	806.407	527.126	110	417.126	0.517265
149	2.789	711.321	112	599.321	342.292	110	232.292	0.387592
150	2.274	904.482	112	792.482	438.686	110	328.686	0.414755
151	3.37	598.35	112	486.35	267.118	110	157.118	0.323055
152	3.237	437.656	112	325.656	192.241	110	82.241	0.252539
153	4.266	864.65	112	752.65	556.599	110	446.599	0.593369
154	3.055	501.745	112	389.745	180.571	110	70.571	0.18107
155	2.025	807.844	112	695.844	226.639	110	116.639	0.167622
156	7.935	983.075	112	871.075	505.163	110	395.163	0.45365
157	2.225	523.933	112	411.933	196.739	110	86.739	0.210566
158	2.972	814.927	112	702.927	405.486	110	295.486	0.420365
159	2.391	488.181	112	376.181	273.257	110	163.257	0.433985
160	2.225	805.963	112	693.963	353.343	110	243.343	0.350657
161	2.523	545.092	112	433.092	253.151	110	143.151	0.330533
162	2.092	639.23	112	527.23	346.476	110	236.476	0.448525
163	2.158	815.385	112	703.385	492.469	110	382.469	0.543755
164	2.407	820.055	112	708.055	613.503	110	503.503	0.711107
165	2.291	709.536	112	597.536	259.42	110	149.42	0.25006
166	6.757	842.231	112	730.231	493.823	110	383.823	0.525619
167	4.765	895.571	112	783.571	718.547	110	608.547	0.776633
168	2.191	712.758	112	600.758	472.909	110	362.909	0.604085
169	4.134	803.193	112	691.193	550.309	110	440.309	0.637028
170	2.092	744.849	112	632.849	483.143	110	373.143	0.589624
171	3.021	1058.39	112	946.39	840.742	110	730.742	0.772136
172	2.241	910.43	112	798.43	312.422	110	202.422	0.253525
173	2.606	523.561	112	411.561	205.159	110	95.159	0.231215
174	4.134	910.008	112	798.008	792.016	110	682.016	0.854648
175	3.071	866.465	112	754.465	377.292	110	267.292	0.35428
176	4.067	691.824	112	579.824	228.4	110	118.4	0.2042
177	2.922	917.125	112	805.125	1020.93	110	910.926	1.13141
178	2.009	626.893	112	514.893	414.438	110	304.438	0.591265
179	3.387	774.407	112	662.407	540.887	110	430.887	0.650487
180	2.108	900.472	112	788.472	679.197	110	569.197	0.721899
181	2.59	946.333	112	834.333	409.564	110	299.564	0.359046
182	2.457	1022.96	112	910.959	475.358	110	365.358	0.40107
183	2.025	876.393	112	764.393	248.189	110	138.189	0.180783
184	3.669	805.081	112	693.081	407.783	110	297.783	0.429651
185	6.574	759.889	112	647.889	538.662	110	428.662	0.661629
186	2.623	517.665	112	405.665	236.044	110	126.044	0.31071
187	2.059	758.863	112	646.863	442.766	110	332.766	0.51443
188	5.379	848.349	112	736.349	387.241	110	277.241	0.376508
189	6.043	573.146	112	461.146	218.786	110	108.786	0.235904
190	3.104	839.647	112	727.647	517.952	110	407.952	0.560645
191	4.333	569.088	112	457.088	344.05	110	234.05	0.512046
192	8.151	829.54	112	717.54	486.695	110	376.695	0.524981
193	2.54	811.627	112	699.627	356.046	110	246.046	0.351682
194	3.868	602.094	112	490.094	279.884	110	169.884	0.346636
195	9.048	817.446	112	705.446	571.33	110	461.33	0.653955
196	5.097	742.147	112	630.147	319.938	110	209.938	0.333157
197	2.059	500.653	112	388.653	191.758	110	81.758	0.210362
198	2.573	661.839	112	549.839	275.916	110	165.916	0.301754
199	2.274	667.672	112	555.672	260.372	110	150.372	0.270613
200	2.723	567.39	112	455.39	282.311	110	172.311	0.378381
201	3.536	760.39	112	648.39	481.704	110	371.704	0.573272
202	2.108	637.402	112	525.402	320.772	110	210.772	0.401163
203	2.507	458.318	112	346.318	205.583	110	95.583	0.275998
204	2.54	747.98	112	635.98	355.961	110	245.961	0.386743
205	2.158	671.977	112	559.977	425.385	110	315.385	0.563211
206	3.519	628.175	112	516.175	337.491	110	227.491	0.440725
207	2.623	700.943	112	588.943	394.177	110	284.177	0.48252
208	2.059	540.484	112	428.484	189.355	110	79.355	0.185199
209	2.723	626.024	112	514.024	270.47	110	160.47	0.312184
210	3.37	663.074	112	551.074	451.729	110	341.729	0.620115
211	2.922	552.227	112	440.227	220.938	110	110.938	0.252002
212	3.254	549.633	112	437.633	216.026	110	106.026	0.242271
213	5.395	599.212	112	487.212	271.203	110	161.203	0.330868
214	2.108	471.803	112	359.803	352.142	110	242.142	0.672985
215	3.785	547.189	112	435.189	258.399	110	148.399	0.340999
216	2.457	439.574	112	327.574	195.926	110	85.926	0.26231
217	2.988	559.306	112	447.306	284.944	110	174.944	0.391106
218	3.138	548.942	112	436.942	217.725	110	107.725	0.246543
219	2.424	698.877	112	586.877	224.288	110	114.288	0.194739
220	7.852	544.074	112	432.074	166.774	110	56.774	0.131399
221	3.021	437.253	112	325.253	180.203	110	70.203	0.215841
222	3.37	465.315	112	353.315	257.133	110	147.133	0.416436
223	3.785	495.338	112	383.338	260.057	110	150.057	0.391448
224	2.208	521.835	112	409.835	272.677	110	162.677	0.396933
225	2.507	399.278	112	287.278	210.596	110	100.596	0.35017
226	3.436	429.565	112	317.565	253.44	110	143.44	0.451687
227	2.889	488.201	112	376.201	176.247	110	66.247	0.176095
228	4.416	658.876	112	546.876	294.707	110	184.707	0.337749
229	2.557	445.883	112	333.883	196.675	110	86.675	0.259597
230	3.237	444.492	112	332.492	231.641	110	121.641	0.365846
231	2.391	509.833	112	397.833	172.382	110	62.382	0.156804
232	2.407	642.262	112	530.262	313.952	110	203.952	0.384625
233	3.32	672.045	112	560.045	583.59	110	473.59	0.845628
234	5.777	517.382	112	405.382	221.595	110	111.595	0.275284
235	2.905	424.686	112	312.686	222.371	110	112.371	0.359373
236	2.175	481.916	112	369.916	212.382	110	102.382	0.276771
237	2.59	579.577	112	467.577	245.269	110	135.269	0.289298
238	3.735	602.031	112	490.031	198.649	110	88.649	0.180905
239	2.756	415.711	112	303.711	156.536	110	46.536	0.153225
240	2.125	512.977	112	400.977	169.609	110	59.609	0.148659
241	2.357	594.254	112	482.254	188.908	110	78.908	0.163623
242	3.021	672.989	112	560.989	145.357	110	35.357	0.0630262
243	6.723	765.104	112	653.104	363.951	110	253.951	0.388837
244	4.15	693.804	112	581.804	244.72	110	134.72	0.231556
245	3.636	601.11	112	489.11	250.315	110	140.315	0.286878
246	2.092	419.913	112	307.913	164.317	110	54.317	0.176404
247	3.486	603.667	112	491.667	379.848	110	269.848	0.548843
248	4.482	703.307	112	591.307	421.63	110	311.63	0.527019
249	2.357	794.317	112	682.317	195.063	110	85.063	0.124668
250	2.009	704.198	112	592.198	320.975	110	210.975	0.356258
251	2.025	662.582	112	550.582	388.41	110	278.41	0.505665
252	6.425	531.545	112	419.545	200.065	110	90.065	0.214673
253	3.586	790.093	112	678.093	258.542	110	148.542	0.219058
254	3.519	796.892	112	684.892	254.547	110	144.547	0.211051
255	4.017	599.178	112	487.178	412.475	110	302.475	0.620872
256	2.258	601.066	112	489.066	198.235	110	88.235	0.180415
257	3.304	874.01	112	762.01	360.563	110	250.563	0.328819
258	3.304	742.442	112	630.442	454.221	110	344.221	0.545999
259	2.125	667.578	112	555.578	122.773	110	12.773	0.0229905
260	3.569	669.953	112	557.953	361.637	110	251.637	0.451
261	2.673	663.913	112	551.913	238.783	110	128.783	0.233339
262	5.96	724.783	112	612.783	296.841	110	186.841	0.304906
263	2.191	543.773	112	431.773	129.871	110	19.871	0.0460219
264	4.416	1038.72	112	926.722	283.695	110	173.695	0.187429
265	2.009	543.331	112	431.331	176.149	110	66.149	0.15336
266	2.374	765.406	112	653.406	233.007	110	123.007	0.188255
267	2.739	689.2	112	577.2	135.83	110	25.83	0.0447505
268	2.573	763.568	112	651.568	350.716	110	240.716	0.369441
269	3.768	648.577	112	536.577	115.722	110	5.722	0.0106639
270	3.785	557.601	112	445.601	249.342	110	139.342	0.312706
271	2.44	653.313	112	541.313	162.592	110	52.592	0.0971564
272	2.274	829.08	112	717.08	315.978	110	205.978	0.287245
273	3.619	780.803	112	668.803	416.711	110	306.711	0.458597
274	2.025	392.451	112	280.451	134.959	110	24.959	0.0889959
275	6.176	641.382	112	529.382	247.293	110	137.293	0.259346
276	6.474	891.908	112	779.908	429.405	110	319.405	0.409542
277	4.864	882.939	112	770.939	328.867	110	218.867	0.283897
278	2.225	896.746	112	784.746	458.269	110	348.269	0.443798
279	2.092	698.897	112	586.897	366.492	110	256.492	0.437031
280	6.524	934.763	112	822.763	360.913	110	250.913	0.304964
281	2.922	862.239	112	750.239	506.557	110	396.557	0.528574
282	2.324	753.129	112	641.129	265.5	110	155.5	0.242541
283	3.785	966.316	112	854.316	346.838	110	236.838	0.277225
284	6.624	895.341	112	783.341	502.845	110	392.845	0.501499
285	5.213	609.694	112	497.694	385.013	110	275.013	0.552574
286	2.075	911.784	112	799.784	359.808	110	249.808	0.312344
287	4.698	917.403	112	805.403	435.265	110	325.265	0.403854
288	4.532	619.974	112	507.974	194.392	110	84.392	0.166134
289	3.27	956.721	112	844.721	330.081	110	220.081	0.260537
290	2.092	656.016	112	544.016	316.19	110	206.19	0.379015
291	6.076	701.47	112	589.47	337.568	110	227.568	0.386055
292	2.208	825.293	112	713.293	267.128	110	157.128	0.220285
293	2.424	797.863	112	685.863	406.363	110	296.363	0.432102
294	2.955	1038.53	112	926.528	364.798	110	254.798	0.275003
295	11.787	962.476	112	850.476	555.646	110	445.646	0.523996
296	2.324	702.843	112	590.843	166.329	110	56.329	0.0953367
297	2.656	691.987	112	579.987	342.85	110	232.85	0.401475
298	6.192	955.788	112	843.788	542.783	110	432.783	0.512905
299	4.183	944.131	112	832.131	374.536	110	264.536	0.317902
300	3.486	688.648	112	576.648	423.852	110	313.852	0.54427
301	2.407	832.117	112	720.117	372.034	110	262.034	0.363877
302	8.251	859.32	112	747.32	540.101	110	430.101	0.575525
303	2.922	905.568	112	793.568	539.943	110	429.943	0.541785
304	2.972	1010.36	112	898.363	528.408	110	418.408	0.465745
305	3.055	846.326	112	734.326	495.158	110	385.158	0.524505
306	4.167	710.574	112	598.574	325.151	110	215.151	0.359439
307	4.017	795.273	112	683.273	542.128	110	432.128	0.632438
308	3.005	1057.91	112	945.912	421.066	110	311.066	0.328853
309	3.32	620.535	112	508.535	353.135	110	243.135	0.478109
310	3.403	569.941	112	457.941	297.751	110	187.751	0.409989
311	2.739	813.097	112	701.097	426.309	110	316.309	0.451163
312	3.37	918.123	112	806.123	218.217	110	108.217	0.134244
313	4.931	735.626	112	623.626	269.549	110	159.549	0.255841
314	4.648	860.571	112	748.571	474.164	110	364.164	0.486479
315	5.296	1000.83	112	888.831	648.552	110	538.552	0.60591
316	2.308	881.036	112	769.036	377.129	110	267.129	0.347356
317	3.636	584.927	112	472.927	249.566	110	139.566	0.295111
318	5.777	1027.91	112	915.911	505.27	110	395.27	0.431559
319	2.673	638.901	112	526.901	165.168	110	55.168	0.104703
320	3.47	999.502	112	887.502	880.943	110	770.943	0.868666
321	2.507	503.94	112	391.94	179.291	110	69.291	0.17679
322	6.972	706.529	112	594.529	524.788	110	414.788	0.697675
323	4.781	862.785	112	750.785	711.819	110	601.819	0.801586
324	2.905	1000.75	112	888.754	789.857	110	679.857	0.764955
325	2.855	434.692	112	322.692	136.209	110	26.209	0.0812199
326	3.37	777.813	112	665.813	761.286	110	651.286	0.978182
327	7.421	908.597	112	796.597	425.937	110	315.937	0.396608
328	3.553	939.313	112	827.313	1297.21	110	1187.21	1.43502
329	2.988	952.033	112	840.033	438.111	110	328.111	0.390593
330	2.739	1034.53	112	922.533	774.255	110	664.255	0.720034
331	2.474	792.174	112	680.174	276.47	110	166.47	0.244746
332	2.573	715	112	603	151.194	110	41.194	0.0683151
333	9.529	793.726	112	681.726	366.286	110	256.286	0.375937
334	2.723	552.659	112	440.659	288.659	110	178.659	0.405436
335	3.221	448.175	112	336.175	263.294	110	153.294	0.455995
336	2.656	1163.17	112	1051.17	939.381	110	829.381	0.789008
337	2.872	537.607	112	425.607	262.347	110	152.347	0.357952
338	2.142	393.574	112	281.574	187.736	110	77.736	0.276077
339	11.422	799.423	112	687.423	557.012	110	447.012	0.650272
340	4.266	820.202	112	708.202	388.3	110	278.3	0.392967
341	3.586	816.662	112	704.662	226.074	110	116.074	0.164723
342	6.806	868.637	112	756.637	459.485	110	349.485	0.461893
343	9.429	533.352	112	421.352	324.412	110	214.412	0.508867
344	3.602	485.581	112	373.581	164.06	110	54.06	0.144708
345	3.918	819.258	112	707.258	379.716	110	269.716	0.381354
346	2.009	621.066	112	509.066	602.57	110	492.57	0.967596
347	5.595	748.362	112	636.362	442.884	110	332.884	0.523105
348	4.134	685.936	112	573.936	169.518	110	59.518	0.103701
349	2.673	372.975	112	260.975	166.882	110	56.882	0.21796
350	3.204	786.772	112	674.772	284.606	110	174.606	0.258763
351	2.357	453.62	112	341.62	170.585	110	60.585	0.177346
352	12.833	864.683	112	752.683	290.988	110	180.988	0.240457
353	4.433	603.592	112	491.592	364.899	110	254.899	0.518517
354	2.274	545.445	112	433.445	238.241	110	128.241	0.295865
355	2.938	593.09	112	481.09	457.955	110	347.955	0.723264
356	5.644	614.088	112	502.088	377.106	110	267.106	0.53199
357	4.931	728.7	112	616.7	523.084	110	413.084	0.66983
358	8.052	742.571	112	630.571	312.833	110	202.833	0.321666
359	5.146	787.942	112	675.942	398.919	110	288.919	0.427432
360	2.689	628.765	112	516.765	383.049	110	273.049	0.528381
361	2.258	378.25	112	266.25	208.5	110	98.5	0.369953
362	2.54	419.961	112	307.961	200.778	110	90.778	0.294771
363	4.183	538.19	112	426.19	195.496	110	85.496	0.200605
364	3.619	487.601	112	375.601	215.193	110	105.193	0.280066
365	4.017	855.525	112	743.525	436.913	110	326.913	0.43968
366	2.407	668.014	112	556.014	425.524	110	315.524	0.567475
367	2.723	597.835	112	485.835	201.64	110	91.64	0.188624
368	3.453	608.163	112	496.163	188.793	110	78.793	0.158805
369	2.739	730.77	112	618.77	462.533	110	352.533	0.569732
370	2.59	577.301	112	465.301	212.16	110	102.16	0.219557
371	4.682	607.748	112	495.748	322.096	110	212.096	0.42783
372	4.1	784.433	112	672.433	480.126	110	370.126	0.550428
373	3.138	535.492	112	423.492	440.116	110	330.116	0.779509
374	4.067	745.829	112	633.829	544.233	110	434.233	0.685095
375	9.861	646.197	112	534.197	303.891	110	193.891	0.362958
376	2.822	426.629	112	314.629	161.359	110	51.359	0.163237
377	5.412	681.887	112	569.887	361.503	110	251.503	0.441321
378	2.507	677.682	112	565.682	244.669	110	134.669	0.238065
379	3.403	712.415	112	600.415	659.829	110	549.829	0.915748
380	2.557	583.396	112	471.396	261.435	110	151.435	0.321248
381	2.689	671.648	112	559.648	541.623	110	431.623	0.77124
382	2.142	522.729	112	410.729	224.628	110	114.628	0.279084
383	2.009	521.926	112	409.926	148.785	110	38.785	0.0946146
384	2.374	762.077	112	650.077	414.287	110	304.287	0.468078
385	3.187	742.099	112	630.099	473.974	110	363.974	0.577646
386	2.059	411.645	112	299.645	126.661	110	16.661	0.0556025
387	2.789	754.304	112	642.304	486.661	110	376.661	0.586422
388	5.03	650.251	112	538.251	359.578	110	249.578	0.463683
389	2.108	362.843	112	250.843	219.89	110	109.89	0.438083
390	2.938	416.232	112	304.232	225.407	110	115.407	0.379339
391	2.158	530.738	112	418.738	200.154	110	90.154	0.215299
392	2.042	518.545	112	406.545	206.854	110	96.854	0.238237
393	3.055	563.446	112	451.446	292.152	110	182.152	0.403486
394	7.886	655.792	112	543.792	457.522	110	347.522	0.639072
395	2.092	698.294	112	586.294	296.302	110	186.302	0.317762
396	3.088	622.301	112	510.301	340.694	110	230.694	0.452074
397	3.553	392.173	112	280.173	175.832	110	65.832	0.234969
398	2.938	564.39	112	452.39	330.859	110	220.859	0.488205
399	5.611	649.127	112	537.127	301.938	110	191.938	0.357342
400	3.121	553.128	112	441.128	372.266	110	262.266	0.594535
401	4.283	620.678	112	508.678	216.217	110	106.217	0.20881
402	14.393	545.965	112	433.965	282.06	110	172.06	0.396484
403	3.885	501.744	112	389.744	319.752	110	209.752	0.538179
404	3.287	679.833	112	567.833	662.909	110	552.909	0.973718
405	3.818	669.661	112	557.661	247.617	110	137.617	0.246775
406	3.287	678.763	112	566.763	169.152	110	59.152	0.104368
407	7.587	518.573	112	406.573	238.7	110	128.7	0.316548
408	2.025	493.713	112	381.713	175.869	110	65.869	0.172562
409	2.274	560.482	112	448.482	301.905	110	191.905	0.427899
410	3.304	628.764	112	516.764	478.553	110	368.553	0.713194
411	2.889	429.201	112	317.201	248.517	110	138.517	0.436685
412	2.723	383.817	112	271.817	229.988	110	119.988	0.441429
413	3.486	411.814	112	299.814	142.629	110	32.629	0.108831
414	4.715	598.891	112	486.891	326.979	110	216.979	0.445642
415	2.142	600.496	112	488.496	284.977	110	174.977	0.358195
416	2.656	451.562	112	339.562	229.881	110	119.881	0.353046
417	2.523	518.099	112	406.099	355.217	110	245.217	0.603836
418	2.059	446.685	112	334.685	147.597	110	37.597	0.112335
419	2.357	410.486	112	298.486	139.887	110	29.887	0.100129
420	2.689	491.765	112	379.765	306.846	110	196.846	0.518336
421	3.138	590.296	112	478.296	164.339	110	54.339	0.11361
422	3.237	499.59	112	387.59	239.103	110	129.103	0.333092
423	8.035	523.202	112	411.202	197.862	110	87.862	0.213671
424	4.482	522.411	112	410.411	207.37	110	97.37	0.23725
425	2.357	486.873	112	374.873	136.296	110	26.296	0.0701464
426	3.154	445.163	112	333.163	169.242	110	59.242	0.177817
427	3.021	421.753	112	309.753	175.687	110	65.687	0.212063
428	2.092	381.508	112	269.508	140.238	110	30.238	0.112197
429	4.648	451.168	112	339.168	230.271	110	120.271	0.354606
430	2.756	453.247	112	341.247	194.271	110	84.271	0.24695
431	3.619	384.885	112	272.885	202.798	110	92.798	0.340063
432	2.357	362.655	112	250.655	156.43	110	46.43	0.185235
433	3.138	580.317	112	468.317	251.899	110	141.899	0.302998
434	2.557	416.052	112	304.052	147.623	110	37.623	0.123739
435	2.191	418.242	112	306.242	142.765	110	32.765	0.106991
436	5.694	593.548	112	481.548	354.239	110	244.239	0.507196
437	4.698	503.155	112	391.155	163.898	110	53.898	0.137792
438	2.806	541.036	112	429.036	257.87	110	147.87	0.344656
439	2.407	556.248	112	444.248	215.021	110	105.021	0.236402
440	4.831	589.804	112	477.804	281.67	110	171.67	0.35929
441	5.196	603.272	112	491.272	197.355	110	87.355	0.177814
442	2.274	529.686	112	417.686	158.788	110	48.788	0.116805
443	7.803	574.506	112	462.506	214.577	110	104.577	0.226109
444	2.075	502.768	112	390.768	168.224	110	58.224	0.148999
445	5.578	517.946	112	405.946	174.065	110	64.065	0.157817
446	3.221	514.582	112	402.582	252.979	110	142.979	0.355155
447	4.366	526.517	112	414.517	157.213	110	47.213	0.113899
448	2.673	612.211	112	500.211	231.925	110	121.925	0.243747
449	2.457	517.959	112	405.959	216.574	110	106.574	0.262524
450	3.619	470.394	112	358.394	224.326	110	114.326	0.318995
451	3.37	748.222	112	636.222	348.379	110	238.379	0.374679
452	4.565	449.898	112	337.898	185.884	110	75.884	0.224577
453	2.341	643.177	112	531.177	258.043	110	148.043	0.278707
454	2.092	395.817	112	283.817	139.897	110	29.897	0.105339
455	2.59	839.628	112	727.628	186.769	110	76.769	0.105506
456	2.457	691.777	112	579.777	201.973	110	91.973	0.158635
457	2.507	572.166	112	460.166	163.013	110	53.013	0.115204
458	3.785	730.066	112	618.066	341.851	110	231.851	0.375123
459	2.059	737.137	112	625.137	237.194	110	127.194	0.203466
460	3.021	566.203	112	454.203	176.291	110	66.291	0.14595
461	5.91	652.548	112	540.548	359.36	110	249.36	0.46131
462	2.391	775.778	112	663.778	314.028	110	204.028	0.307374
463	3.835	645.732	112	533.732	239.45	110	129.45	0.242537
464	2.274	740.066	112	628.066	260.088	110	150.088	0.238969
465	3.868	660.515	112	548.515	240.322	110	130.322	0.237591
466	2.938	478.61	112	366.61	192.819	110	82.819	0.225905
467	4.781	808.799	112	696.799	343.972	110	233.972	0.335781
468	5.246	819.899	112	707.899	374.389	110	264.389	0.373484
469	2.042	452.447	112	340.447	149.041	110	39.041	0.114676
470	3.237	673.256	112	561.256	405.862	110	295.862	0.527143
471	3.851	793.026	112	681.026	383.547	110	273.547	0.401669
472	8.301	864.252	112	752.252	306.504	110	196.504	0.261221
473	2.158	483.362	112	371.362	185.415	110	75.415	0.203077
474	6.01	654.058	112	542.058	446.666	110	336.666	0.621089
475	4.665	683.907	112	571.907	340.609	110	230.609	0.403228
476	2.905	696.994	112	584.994	205.137	110	95.137	0.162629
477	3.685	705.248	112	593.248	759.189	110	649.189	1.0943
478	8.55	860.895	112	748.895	467.584	110	357.584	0.477482
479	4.698	794.551	112	682.551	377.597	110	267.597	0.392054
480	2.59	641.128	112	529.128	197.154	110	87.154	0.164713
481	4.499	775.627	112	663.627	358.904	110	248.904	0.375066
482	2.059	521.887	112	409.887	187.129	110	77.129	0.188171
483	8.002	819.214	112	707.214	334.071	110	224.071	0.316836
484	2.54	729.405	112	617.405	378.373	110	268.373	0.434679
485	2.108	734.63	112	622.63	338.504	110	228.504	0.366998
486	2.689	919.049	112	807.049	633.796	110	523.796	0.649026
487	6.209	909.676	112	797.676	388.973	110	278.973	0.349732
488	3.353	690.134	112	578.134	479.48	110	369.48	0.639091
489	7.305	540.12	112	428.12	226.348	110	116.348	0.271765
490	3.42	534.597	112	422.597	297.845	110	187.845	0.444501
491	2.656	551.056	112	439.056	211.95	110	101.95	0.232203
492	3.785	803.382	112	691.382	431.658	110	321.658	0.465239
493	4.15	803.84	112	691.84	679.324	110	569.324	0.822913
494	2.407	630.407	112	518.407	209.29	110	99.29	0.191529
495	3.453	896.702	112	784.702	560.135	110	450.135	0.573638
496	3.752	634.469	112	522.469	355.071	110	245.071	0.469063
497	2.025	645.385	112	533.385	248.369	110	138.369	0.259417
498	3.934	707.008	112	595.008	204.283	110	94.283	0.158457
499	2.457	839.338	112	727.338	298.331	110	188.331	0.258932
500	3.652	876.555	112	764.555	679.141	110	569.141	0.744408
501	2.341	778.475	112	666.475	828.284	110	718.284	1.07774
502	4.632	822.953	112	710.953	513.885	110	403.885	0.56809
503	4.134	634.631	112	522.631	349.1	110	239.1	0.457493
504	6.84	779.709	112	667.709	622.917	110	512.917	0.768174
505	5.545	933.617	112	821.617	450.716	110	340.716	0.41469
506	3.752	651.478	112	539.478	230.841	110	120.841	0.223996
507	2.025	869.336	112	757.336	800.23	110	690.23	0.911392
508	3.021	802.104	112	690.104	989.549	110	879.549	1.27452
509	4.466	645.892	112	533.892	369.996	110	259.996	0.486982
510	3.619	839.225	112	727.225	506.647	110	396.647	0.545425
511	5.927	699.011	112	587.011	313.364	110	203.364	0.34644
512	2.042	574.862	112	462.862	190.886	110	80.886	0.174752
513	2.424	463.377	112	351.377	167.692	110	57.692	0.164188
514	4.034	866.169	112	754.169	697.864	110	587.864	0.779486
515	7.404	817.17	112	705.17	328.753	110	218.753	0.310213
516	2.424	720.137	112	608.137	175.425	110	65.425	0.107583
517	2.756	926.747	112	814.747	385.843	110	275.843	0.338563
518	5.229	576.235	112	464.235	321.07	110	211.07	0.454662
519	4.15	658.812	112	546.812	379.848	110	269.848	0.493493
520	2.739	699.588	112	587.588	378.982	110	268.982	0.457773
521	4.715	615.035	112	503.035	303.859	110	193.859	0.385379
522	2.059	883.968	112	771.968	453.484	110	343.484	0.444946
523	4.017	844.442	112	732.442	592.917	110	482.917	0.659325
524	2.739	812.121	112	700.121	280.242	110	170.242	0.243161
525	4.466	1061.57	112	949.565	679.494	110	569.494	0.599742
526	3.104	907.717	112	795.717	641.829	110	531.829	0.668365
527	2.772	624.234	112	512.234	585.91	110	475.91	0.929087
528	2.225	597.619	112	485.619	155.948	110	45.948	0.0946174
529	2.855	842.128	112	730.128	530.779	110	420.779	0.576309
530	2.108	712.614	112	600.614	376.693	110	266.693	0.444034
531	2.872	401.202	112	289.202	208.023	110	98.023	0.338943
532	3.503	696.72	112	584.72	352.517	110	242.517	0.414757
533	2.108	492.417	112	380.417	140.118	110	30.118	0.079171
534	7.52	873.728	112	761.728	366.68	110	256.68	0.336971
535	2.042	913.602	112	801.602	573.707	110	463.707	0.578475
536	2.341	866.199	112	754.199	355.809	110	245.809	0.325921
537	2.407	727.166	112	615.166	114	110	4	0.00650231
538	3.835	486.649	112	374.649	367.762	110	257.762	0.688009
539	2.54	452.752	112	340.752	189.333	110	79.333	0.232817
540	7.139	1101.83	112	989.826	895.063	110	785.063	0.793132
541	2.938	777.181	112	665.181	381.576	110	271.576	0.408274
542	5.08	746.304	112	634.304	357.111	110	247.111	0.389578
543	4.848	807.795	112	695.795	757.884	110	647.884	0.931142
544	8.832	822.722	112	710.722	451.876	110	341.876	0.481026
545	2.772	755.449	112	643.449	219.641	110	109.641	0.170396
546	2.457	654.345	112	542.345	228.561	110	118.561	0.218608
547	3.802	785.546	112	673.546	488.428	110	378.428	0.561844
548	6.64	849.11	112	737.11	910.942	110	800.942	1.0866
549	2.009	358.719	112	246.719	166.074	110	56.074	0.227279
550	8.981	457.821	112	345.821	206.192	110	96.192	0.278155
551	3.27	454.614	112	342.614	312.893	110	202.893	0.592191
552	3.503	409.171	112	297.171	170.223	110	60.223	0.202654
553	5.578	827.812	112	715.812	509.098	110	399.098	0.557546
554	3.055	704.103	112	592.103	354.087	110	244.087	0.412237
555	2.822	887.641	112	775.641	525.494	110	415.494	0.535678
556	5.03	749.96	112	637.96	260.997	110	150.997	0.236687
557	11.239	794.372	112	682.372	341.824	110	231.824	0.339733
558	2.656	820.731	112	708.731	324.956	110	214.956	0.303297
559	2.225	483.246	112	371.246	200.925	110	90.925	0.244918
560	2.789	525.631	112	413.631	190.464	110	80.464	0.194531
561	4.001	622.029	112	510.029	422.075	110	312.075	0.611877
562	3.021	683.203	112	571.203	477.005	110	367.005	0.642512
563	2.54	800.915	112	688.915	446.111	110	336.111	0.487885
564	3.071	566.411	112	454.411	212.162	110	102.162	0.224823
565	3.27	575.147	112	463.147	276.31	110	166.31	0.359087
566	3.088	750.914	112	638.914	162.817	110	52.817	0.0826668
567	5.263	451.325	112	339.325	220.785	110	110.785	0.326486
568	3.669	786.67	112	674.67	261.896	110	151.896	0.225141
569	2.507	669.457	112	557.457	573.636	110	463.636	0.831698
570	3.088	935.688	112	823.688	893.478	110	783.478	0.951183
571	4.748	670.895	112	558.895	322.357	110	212.357	0.379959
572	4.117	566.879	112	454.879	243.19	110	133.19	0.292803
573	5.279	684.047	112	572.047	249.384	110	139.384	0.243658
574	2.872	664.474	112	552.474	357.925	110	247.925	0.448754
575	4.25	792.402	112	680.402	436.5	110	326.5	0.479863
576	13.48	832.6	112	720.6	412.986	110	302.986	0.420464
577	3.42	745.243	112	633.243	403.864	110	293.864	0.464062
578	5.893	605.614	112	493.614	212.682	110	102.682	0.208021
579	2.839	667.427	112	555.427	218.608	110	108.608	0.19554
580	6.375	820.742	112	708.742	484.419	110	374.419	0.528287
581	6.524	713.702	112	601.702	266.547	110	156.547	0.260174
582	6.574	685.646	112	573.646	318.975	110	208.975	0.364293
583	7.52	659.583	112	547.583	466.055	110	356.055	0.65023
584	2.009	440.43	112	328.43	162.132	110	52.132	0.158731
585	2.839	620.175	112	508.175	285.082	110	175.082	0.344531
586	4.001	732.261	112	620.261	275.112	110	165.112	0.266198
587	12.119	648.916	112	536.916	277.659	110	167.659	0.312263
588	4.001	645.822	112	533.822	250.004	110	140.004	0.262267
589	3.287	719.611	112	607.611	267.894	110	157.894	0.25986
590	4.864	552.427	112	440.427	254.092	110	144.092	0.327164
591	7.554	666.365	112	554.365	438.866	110	328.866	0.59323
592	11.422	627.567	112	515.567	327.676	110	217.676	0.422207
593	8.135	739.678	112	627.678	606.155	110	496.155	0.790461
594	6.259	666.321	112	554.321	385.91	110	275.91	0.497744
595	2.789	421.952	112	309.952	221.935	110	111.935	0.361137
596	4.001	504.05	112	392.05	179.357	110	69.357	0.176909
597	4.316	716.223	112	604.223	150.788	110	40.788	0.0675049
598	4.914	733.574	112	621.574	636.456	110	526.456	0.846972
599	12.7	757.563	112	645.563	311.281	110	201.281	0.311791
600	2.656	436.675	112	324.675	176.775	110	66.775	0.205667
601	3.038	635.169	112	523.169	285.579	110	175.579	0.335607
602	2.208	738.647	112	626.647	376	110	266	0.424481
603	2.125	423.547	112	311.547	143.836	110	33.836	0.108606
604	2.225	419.515	112	307.515	126.231	110	16.231	0.0527812
605	6.624	636.256	112	524.256	341.92	110	231.92	0.442379
606	4.167	618.466	112	506.466	252.028	110	142.028	0.280429
607	3.984	644.067	112	532.067	262.367	110	152.367	0.286368
608	2.407	387.676	112	275.676	188.979	110	78.979	0.286492
609	5.163	520.35	112	408.35	167.836	110	57.836	0.141633
610	3.42	733.733	112	621.733	370.99	110	260.99	0.419778
611	2.357	588.134	112	476.134	238.725	110	128.725	0.270355
612	10.492	716.91	112	604.91	321.078	110	211.078	0.348941
613	2.772	583.665	112	471.665	244.192	110	134.192	0.284507
614	2.723	707.36	112	595.36	196.671	110	86.671	0.145577
615	5.927	555.101	112	443.101	251.95	110	141.95	0.320356
616	2.424	439.829	112	327.829	164.247	110	54.247	0.165473
617	4.3	643.382	112	531.382	361.301	110	251.301	0.47292
618	4.848	669.63	112	557.63	326.425	110	216.425	0.388116
619	2.158	640.554	112	528.554	356.438	110	246.438	0.466249
620	2.092	505.278	112	393.278	239.405	110	129.405	0.329042
621	2.341	424.369	112	312.369	153.184	110	43.184	0.138247
622	5.246	687.965	112	575.965	330.196	110	220.196	0.382308
623	5.146	620.6	112	508.6	495.929	110	385.929	0.758807
624	2.291	569.652	112	457.652	310.362	110	200.362	0.437804
625	4.781	550.99	112	438.99	260.514	110	150.514	0.342864
626	6.159	466.951	112	354.951	199.329	110	89.329	0.251666
627	3.038	617.443	112	505.443	367.749	110	257.749	0.509947
628	4.333	619.923	112	507.923	367.897	110	257.897	0.507748
629	6.474	391.474	112	279.474	159.523	110	49.523	0.177201
630	3.519	492.778	112	380.778	248.575	110	138.575	0.363926
631	6.906	716.8	112	604.8	408.118	110	298.118	0.49292
632	3.752	552.717	112	440.717	297.991	110	187.991	0.426557
633	2.324	352.9	112	240.9	139.157	110	29.157	0.121034
634	2.291	571.848	112	459.848	172.754	110	62.754	0.136467
635	5.445	647.372	112	535.372	320.253	110	210.253	0.392723
636	2.158	532.108	112	420.108	178.377	110	68.377	0.162761
637	7.155	497.237	112	385.237	198.346	110	88.346	0.229329
638	5.611	466.142	112	354.142	194.003	110	84.003	0.237201
639	3.37	532.833	112	420.833	255.463	110	145.463	0.345655
640	9.878	464.45	112	352.45	176.402	110	66.402	0.188401
641	4.333	411.87	112	299.87	168.506	110	58.506	0.195105
642	3.602	537.926	112	425.926	311.313	110	201.313	0.472648
643	6.325	563.633	112	451.633	332.257	110	222.257	0.492119
644	4.499	586.838	112	474.838	204.531	110	94.531	0.199081
645	4.831	574.876	112	462.876	184	110	74	0.15987
646	3.353	527.559	112	415.559	236.455	110	126.455	0.304301
647	2.407	510.214	112	398.214	273.448	110	163.448	0.410453
648	3.154	579.058	112	467.058	415.826	110	305.826	0.654792
649	4.034	521.671	112	409.671	168.938	110	58.938	0.143867
650	5.362	504.759	112	392.759	206.059	110	96.059	0.244575
651	2.44	400.034	112	288.034	153.401	110	43.401	0.15068
652	2.341	361.745	112	249.745	147.213	110	37.213	0.149004
653	2.208	482.692	112	370.692	147.293	110	37.293	0.100604
654	4.233	482.137	112	370.137	276.376	110	166.376	0.449498
655	3.237	372.159	112	260.159	137.323	110	27.323	0.105024
656	3.619	450.312	112	338.312	181.073	110	71.073	0.210081
657	2.025	425.475	112	313.475	156.32	110	46.32	0.147763
658	2.374	476.385	112	364.385	200.322	110	90.322	0.247875
659	2.756	399.361	112	287.361	234.114	110	124.114	0.43191
660	2.806	437.722	112	325.722	206.118	110	96.118	0.295092
661	2.274	413.212	112	301.212	161.891	110	51.891	0.172274
662	3.353	387.411	112	275.411	215.327	110	105.327	0.382436
663	2.042	451.919	112	339.919	152.301	110	42.301	0.124444
664	2.225	495.888	112	383.888	123.754	110	13.754	0.0358282
665	3.154	501.963	112	389.963	139.605	110	29.605	0.0759175
666	4.964	485.154	112	373.154	164.86	110	54.86	0.147017
667	2.108	498.354	112	386.354	224.055	110	114.055	0.295209
668	2.258	448.647	112	336.647	152.485	110	42.485	0.1262
669	3.702	430.291	112	318.291	154.735	110	44.735	0.140547
670	2.341	440.759	112	328.759	208.73	110	98.73	0.300311
671	5.346	448.609	112	336.609	188.422	110	78.422	0.232977
672	2.009	625.785	112	513.785	150.843	110	40.843	0.0794943
673	2.889	524.805	112	412.805	310.695	110	200.695	0.486174
674	2.075	559.416	112	447.416	170.472	110	60.472	0.135158
675	2.64	643.119	112	531.119	150.648	110	40.648	0.0765328
676	15.041	659.538	112	547.538	221.49	110	111.49	0.203621
677	2.175	579.901	112	467.901	175.107	110	65.107	0.139147
678	2.191	630.848	112	518.848	193.515	110	83.515	0.160962
679	4.964	465.247	112	353.247	214.498	110	104.498	0.295821
680	4.731	700.112	112	588.112	273.232	110	163.232	0.277553
681	2.49	651.66	112	539.66	154.213	110	44.213	0.0819275
682	4.748	509.196	112	397.196	225.927	110	115.927	0.291863
683	3.387	618.265	112	506.265	170.074	110	60.074	0.118661
684	3.636	700.749	112	588.749	331.744	110	221.744	0.376636
685	2.059	453.387	112	341.387	151.25	110	41.25	0.120831
686	2.225	633.478	112	521.478	252.127	110	142.127	0.272546
687	2.357	622.986	112	510.986	192.88	110	82.88	0.162196
688	9.38	543.984	112	431.984	164.412	110	54.412	0.125958
689	2.142	695.837	112	583.837	202.783	110	92.783	0.158919
690	2.839	680.924	112	568.924	209.392	110	99.392	0.174702
691	2.225	723.015	112	611.015	151.463	110	41.463	0.0678592
692	2.025	598.262	112	486.262	212.689	110	102.689	0.21118
693	5.478	557.176	112	445.176	250.097	110	140.097	0.3147
694	3.818	706.265	112	594.265	418.77	110	308.77	0.519583
695	2.54	734.608	112	622.608	195.641	110	85.641	0.137552
696	4.831	395.388	112	283.388	180.694	110	70.694	0.24946
697	2.988	688.65	112	576.65	294.911	110	184.911	0.320664
698	2.855	736.983	112	624.983	205.831	110	95.831	0.153334
699	4.665	544.858	112	432.858	172.302	110	62.302	0.143932
700	3.486	489.462	112	377.462	212.676	110	102.676	0.272017
701	4.931	680.266	112	568.266	331.519	110	221.519	0.389816
702	13.264	692.63	112	580.63	316.557	110	206.557	0.355746
703	3.27	596.102	112	484.102	209.944	110	99.944	0.206452
704	2.158	669.738	112	557.738	305.123	110	195.123	0.349847
705	3.154	680.247	112	568.247	391.279	110	281.279	0.494994
706	2.025	567.279	112	455.279	313.762	110	203.762	0.447554
707	6.358	831.775	112	719.775	402.807	110	292.807	0.406804
708	4.516	748.978	112	636.978	247.5	110	137.5	0.215863
709	2.125	728.812	112	616.812	849.266	110	739.266	1.19853
710	2.175	772.992	112	660.992	161.611	110	51.611	0.0780811
711	4.532	557.645	112	445.645	222.67	110	112.67	0.252825
712	3.586	743.704	112	631.704	226.44	110	116.44	0.184327
713	2.457	560.128	112	448.128	162.797	110	52.797	0.117817
714	2.075	774.752	112	662.752	489.96	110	379.96	0.573306
715	2.092	639.508	112	527.508	109.135	110	0	0
716	4.848	472.318	112	360.318	188.719	110	78.719	0.218471
717	2.54	813.19	112	701.19	557.464	110	447.464	0.638149
718	2.391	583.306	112	471.306	202.771	110	92.771	0.196838
719	3.221	587.753	112	475.753	189.758	110	79.758	0.167646
720	2.092	717.437	112	605.437	313.579	110	203.579	0.336251
721	3.984	621.804	112	509.804	323.312	110	213.312	0.41842
722	2.573	483.794	112	371.794	158.49	110	48.49	0.130422
723	3.27	485.147	112	373.147	173.99	110	63.99	0.171487
724	2.855	767.57	112	655.57	488.953	110	378.953	0.578051
725	4.051	711.279	112	599.279	296.471	110	186.471	0.311159
726	2.374	755.133	112	643.133	144.476	110	34.476	0.0536063
727	2.673	414.217	112	302.217	188.944	110	78.944	0.261216
728	6.657	514.095	112	402.095	227.249	110	117.249	0.291595
729	6.806	751.512	112	639.512	308.549	110	198.549	0.31047
730	3.835	461.1	112	349.1	256.264	110	146.264	0.418975
731	2.208	769.368	112	657.368	325.368	110	215.368	0.327622
732	2.706	814.951	112	702.951	286.589	110	176.589	0.251211
733	11.571	738.05	112	626.05	440.208	110	330.208	0.527447
734	3.702	915.552	112	803.552	569.305	110	459.305	0.571593
735	2.274	862.737	112	750.737	415.27	110	305.27	0.406627
736	2.557	846.578	112	734.578	867.916	110	757.916	1.03177
737	4.582	587.812	112	475.812	183.797	110	73.797	0.155097
738	2.158	609.569	112	497.569	163.262	110	53.262	0.107044
739	4.084	657.752	112	545.752	336.382	110	226.382	0.414807
740	4.632	655.262	112	543.262	298.251	110	188.251	0.34652
741	2.092	562.159	112	450.159	183.77	110	73.77	0.163875
742	3.104	791.743	112	679.743	599.898	110	489.898	0.720711
743	8.566	720.771	112	608.771	432.372	110	322.372	0.529546
744	12.152	854.876	112	742.876	559.303	110	449.303	0.604816
745	6.325	558.866	112	446.866	277.567	110	167.567	0.374983
746	4.3	727.066	112	615.066	226.996	110	116.996	0.190217
747	4.698	887.633	112	775.633	564.749	110	454.749	0.586294
748	4.15	814.848	112	702.848	503.78	110	393.78	0.560263
749	2.025	401.73	112	289.73	183.689	110	73.689	0.254337
750	3.569	740.809	112	628.809	314.381	110	204.381	0.325029
751	2.772	564.425	112	452.425	144.808	110	34.808	0.0769365
752	2.075	695.168	112	583.168	173.752	110	63.752	0.10932
753	2.274	645.847	112	533.847	244.285	110	134.285	0.251542
754	5.545	561.985	112	449.985	225.027	110	115.027	0.255624
755	6.209	904.663	112	792.663	495.16	110	385.16	0.485906
756	3.47	827.947	112	715.947	424.89	110	314.89	0.439823
757	7.122	705.068	112	593.068	295.585	110	185.585	0.312924
758	2.175	719.641	112	607.641	314.427	110	204.427	0.336427
759	2.308	643.489	112	531.489	289.05	110	179.05	0.336884
760	5.113	930.081	112	818.081	538.37	110	428.37	0.523628
761	2.391	741.174	112	629.174	872.312	110	762.312	1.21161
762	2.557	449.552	112	337.552	155.688	110	45.688	0.135351
763	2.175	389.122	112	277.122	182.573	110	72.573	0.261881
764	3.486	384.795	112	272.795	163.986	110	53.986	0.1979
765	2.988	444.4	112	332.4	231.144	110	121.144	0.364452
766	2.125	854.305	112	742.305	367.812	110	257.812	0.347313
767	2.225	752.358	112	640.358	388.97	110	278.97	0.435647
768	2.241	399.896	112	287.896	190.748	110	80.748	0.280476
769	2.689	880.506	112	768.506	752.679	110	642.679	0.836271
770	2.391	645.75	112	533.75	179.688	110	69.688	0.130563
771	2.474	963.732	112	851.732	414.919	110	304.919	0.357999
772	4.466	892.587	112	780.587	804.814	110	694.814	0.890117
773	2.772	824.844	112	712.844	448.03	110	338.03	0.474199
774	6.674	629.505	112	517.505	348.122	110	238.122	0.460135
775	2.191	564.977	112	452.977	135.576	110	25.576	0.056462
776	4.698	819.89	112	707.89	689.749	110	579.749	0.818982
777	5.893	867.299	112	755.299	590.383	110	480.383	0.636017
778	2.092	724.802	112	612.802	829.786	110	719.786	1.17458
779	2.059	966.879	112	854.879	734.323	110	624.323	0.730306
780	11.687	863.903	112	751.903	612.386	110	502.386	0.668153
781	2.972	480.615	112	368.615	214.721	110	104.721	0.284093
782	8.749	826.844	112	714.844	418.7	110	308.7	0.431842
783	3.918	811.309	112	699.309	195.619	110	85.619	0.122434
784	7.271	840.491	112	728.491	287.064	110	177.064	0.243056
785	3.021	786.731	112	674.731	298.181	110	188.181	0.278898
786	3.503	729.986	112	617.986	166.526	110	56.526	0.0914681
787	2.025	469.893	112	357.893	188.107	110	78.107	0.218241
788	3.37	777.192	112	665.192	525.276	110	415.276	0.624295
789	3.453	595.615	112	483.615	218.389	110	108.389	0.224122
790	3.802	776.563	112	664.563	513.502	110	403.502	0.607169
791	11.056	690.76	112	578.76	299.596	110	189.596	0.32759
792	2.938	435.107	112	323.107	161.571	110	51.571	0.15961
793	3.187	768.005	112	656.005	253.667	110	143.667	0.219003
794	7.886	763.301	112	651.301	710.556	110	600.556	0.922087
795	2.191	378.909	112	266.909	199.333	110	89.333	0.334695
796	3.287	761.808	112	649.808	464.242	110	354.242	0.545149
797	7.006	853.187	112	741.187	318.104	110	208.104	0.280771
798	2.822	545.353	112	433.353	252.006	110	142.006	0.327691
799	5.097	577.472	112	465.472	301.919	110	191.919	0.412311
800	2.54	676.529	112	564.529	765.314	110	655.314	1.16082
801	3.752	437.628	112	325.628	189.54	110	79.54	0.244266
802	7.039	822.531	112	710.531	587.797	110	477.797	0.672451
803	5.063	778.938	112	666.938	278.013	110	168.013	0.251917
804	11.123	677.957	112	565.957	403.307	110	293.307	0.51825
805	2.009	468.132	112	356.132	336.702	110	226.702	0.636567
806	2.656	573.675	112	461.675	268.969	110	158.969	0.344331
807	3.768	531.172	112	419.172	191.079	110	81.079	0.193427
808	4.383	692.754	112	580.754	566.693	110	456.693	0.786379
809	2.474	717.597	112	605.597	477.403	110	367.403	0.606679
810	2.025	382.492	112	270.492	215.008	110	105.008	0.388211
811	2.407	694.807	112	582.807	426.841	110	316.841	0.543647
812	5.661	682.399	112	570.399	602.786	110	492.786	0.863932
813	5.395	550.575	112	438.575	185.837	110	75.837	0.172917
814	2.972	543.179	112	431.179	170.145	110	60.145	0.13949
815	10.044	613.101	112	501.101	285.965	110	175.965	0.351157
816	2.241	704.437	112	592.437	248.289	110	138.289	0.233424
817	3.486	514.995	112	402.995	185.548	110	75.548	0.187466
818	2.042	746.553	112	634.553	611.732	110	501.732	0.790686
819	2.59	622.16	112	510.16	165.391	110	55.391	0.108576
820	3.735	681.978	112	569.978	369.453	110	259.453	0.455198
821	4.167	609.151	112	497.151	227.287	110	117.287	0.235918
822	2.009	690.438	112	578.438	550.248	110	440.248	0.761098
823	4.632	737.9	112	625.9	335.419	110	225.419	0.360152
824	3.918	638.11	112	526.11	241.186	110	131.186	0.249351
825	2.391	414.139	112	302.139	175.361	110	65.361	0.216328
826	3.636	585.114	112	473.114	446.982	110	336.982	0.712264
827	2.806	591.402	112	479.402	225.68	110	115.68	0.241301
828	2.208	512.82	112	400.82	178.383	110	68.383	0.170608
829	6.275	486.14	112	374.14	211.95	110	101.95	0.272492
830	6.275	433.841	112	321.841	194.373	110	84.373	0.262157
831	2.474	528.879	112	416.879	381.577	110	271.577	0.651453
832	3.968	574.071	112	462.071	266.381	110	156.381	0.338435
833	6.425	521.656	112	409.656	246.571	110	136.571	0.33338
834	3.569	686.949	112	574.949	372.191	110	262.191	0.456025
835	10.575	636.906	112	524.906	320.487	110	210.487	0.400999
836	2.972	419.486	112	307.486	253.978	110	143.978	0.468242
837	2.208	383.466	112	271.466	152.737	110	42.737	0.15743
838	5.329	589.607	112	477.607	173.654	110	63.654	0.133277
839	2.54	554.085	112	442.085	206.386	110	96.386	0.218026
840	2.274	495.978	112	383.978	228.146	110	118.146	0.30769
841	4.931	550.057	112	438.057	218.121	110	108.121	0.246819
842	3.237	457.918	112	345.918	146.81	110	36.81	0.106413
843	3.752	548.739	112	436.739	198.85	110	88.85	0.20344
844	4.814	504.307	112	392.307	232.448	110	122.448	0.312123
845	4.449	541.19	112	429.19	125.399	110	15.399	0.0358792
846	3.436	465.546	112	353.546	211.749	110	101.749	0.287796
847	2.54	489.072	112	377.072	182.111	110	72.111	0.191239
848	4.433	553.753	112	441.753	283.412	110	173.412	0.392554
849	3.237	488.559	112	376.559	202.313	110	92.313	0.245149
850	3.221	496.134	112	384.134	187.129	110	77.129	0.200787
851	3.669	532.398	112	420.398	173.932	110	63.932	0.152075
852	4.715	510.229	112	398.229	224.088	110	114.088	0.286488
853	2.706	470.282	112	358.282	231.221	110	121.221	0.33834
854	2.125	414.492	112	302.492	227.578	110	117.578	0.388698
855	2.557	447.545	112	335.545	211.714	110	101.714	0.303131
856	4.698	474.615	112	362.615	219.767	110	109.767	0.302709
857	3.337	465.373	112	353.373	197.995	110	87.995	0.249014
858	2.59	444.808	112	332.808	445.474	110	335.474	1.00801
859	2.092	462.214	112	350.214	263.516	110	153.516	0.438349
860	4.599	610.278	112	498.278	198.989	110	88.989	0.178593
861	3.519	441.83	112	329.83	149.33	110	39.33	0.119243
862	3.154	477.679	112	365.679	156.716	110	46.716	0.127751
863	2.158	449.023	112	337.023	200.185	110	90.185	0.267593
864	3.802	436	112	324	166.022	110	56.022	0.172907
865	2.673	428.149	112	316.149	174.068	110	64.068	0.202651
866	2.059	426.766	112	314.766	222.371	110	112.371	0.356999
867	4.3	379.695	112	267.695	180.745	110	70.745	0.264275
868	3.121	445.404	112	333.404	164.261	110	54.261	0.162748
869	2.905	401.52	112	289.52	155.657	110	45.657	0.157699
870	3.32	419.875	112	307.875	265.48	110	155.48	0.50501
871	2.474	423.315	112	311.315	165.47	110	55.47	0.17818
872	2.606	403.185	112	291.185	157.344	110	47.344	0.162591
873	2.889	487.448	112	375.448	147.793	110	37.793	0.100661
874	2.025	464.369	112	352.369	182.926	110	72.926	0.206959
875	6.325	547.892	112	435.892	182.929	110	72.929	0.16731
876	3.436	438.372	112	326.372	253.971	110	143.971	0.441125
877	2.291	495.522	112	383.522	144.522	110	34.522	0.0900131
878	4.814	421.31	112	309.31	145.441	110	35.441	0.114581
879	4.615	526.36	112	414.36	168.029	110	58.029	0.140045
880	2.872	542.318	112	430.318	144.491	110	34.491	0.0801524
881	2.142	497.186	112	385.186	217.922	110	107.922	0.280182
882	3.802	475.061	112	363.061	142.227	110	32.227	0.0887647
883	3.569	452.586	112	340.586	159.8	110	49.8	0.146219
884	3.304	457.07	112	345.07	172.492	110	62.492	0.181099
885	2.623	557.196	112	445.196	134.304	110	24.304	0.0545917
886	2.191	449.652	112	337.652	143.174	110	33.174	0.0982491
887	2.308	444	112	332	198.683	110	88.683	0.267117
888	2.523	568.237	112	456.237	304.658	110	194.658	0.42666
889	3.702	561.318	112	449.318	278.287	110	168.287	0.374539
890	2.341	619.135	112	507.135	242.277	110	132.277	0.260832
891	4.001	588.444	112	476.444	143.091	110	33.091	0.0694541
892	2.042	456.642	112	344.642	153.317	110	43.317	0.125687
893	4.997	584.575	112	472.575	211.452	110	101.452	0.214679
894	3.071	538.551	112	426.551	247.151	110	137.151	0.321535
895	3.055	647.87	112	535.87	188.766	110	78.766	0.146987
896	4.034	613.765	112	501.765	253.716	110	143.716	0.286421
897	4.3	618.12	112	506.12	311.386	110	201.386	0.397902
898	2.457	663.324	112	551.324	422.811	110	312.811	0.567381
899	3.586	662.389	112	550.389	349.898	110	239.898	0.43587
900	5.927	615.011	112	503.011	232.877	110	122.877	0.244283
901	2.573	433.729	112	321.729	131.755	110	21.755	0.067619
902	4.897	504.841	112	392.841	232.776	110	122.776	0.312534
903	4.399	477.238	112	365.238	247.498	110	137.498	0.376461
904	2.175	593.649	112	481.649	194.42	110	84.42	0.175273
905	5.943	489.173	112	377.173	246.472	110	136.472	0.361829
906	6.342	764.937	112	652.937	495.254	110	385.254	0.590032
907	3.187	609.656	112	497.656	330.302	110	220.302	0.442679
908	2.175	711.061	112	599.061	369.29	110	259.29	0.432827
909	3.503	427.706	112	315.706	150.692	110	40.692	0.128892
910	3.187	750.505	112	638.505	262.359	110	152.359	0.238618
911	2.374	534.497	112	422.497	161.531	110	51.531	0.121968
912	2.407	685.179	112	573.179	335.083	110	225.083	0.392692
913	5.03	556.043	112	444.043	227.406	110	117.406	0.264402
914	2.208	751.917	112	639.917	316.932	110	206.932	0.323373
915	2.457	646.432	112	534.432	252.25	110	142.25	0.26617
916	3.005	462.022	112	350.022	163.028	110	53.028	0.151499
917	2.258	672.699	112	560.699	154.743	110	44.743	0.0797986
918	3.802	681.721	112	569.721	246.109	110	136.109	0.238905
919	5.097	801.984	112	689.984	180.801	110	70.801	0.102613
920	4.067	602.302	112	490.302	372.89	110	262.89	0.53618
921	2.938	635.977	112	523.977	361.441	110	251.441	0.47987
922	6.259	711.645	112	599.645	293.966	110	183.966	0.306792
923	2.142	631.922	112	519.922	124.69	110	14.69	0.0282542
924	31.426	707.289	112	595.289	308.547	110	198.547	0.33353
925	3.968	769.013	112	657.013	340.556	110	230.556	0.350915
926	2.889	753.259	112	641.259	345.356	110	235.356	0.367022
927	2.623	440.051	112	328.051	275.696	110	165.696	0.505092
928	2.225	571.246	112	459.246	148.53	110	38.53	0.0838984
929	5.777	598.376	112	486.376	301.057	110	191.057	0.392817
930	2.142	462.876	112	350.876	164.14	110	54.14	0.1543
931	3.353	607.322	112	495.322	323.411	110	213.411	0.430853
932	3.005	539.68	112	427.68	211.387	110	101.387	0.237063
933	2.374	782.601	112	670.601	385.923	110	275.923	0.411456
934	2.988	467.478	112	355.478	153.55	110	43.55	0.122511
935	4.001	753.411	112	641.411	445.726	110	335.726	0.523418
936	4.134	788.161	112	676.161	293.277	110	183.277	0.271055
937	2.258	668.419	112	556.419	553.647	110	443.647	0.797325
938	2.158	581.892	112	469.892	138.338	110	28.338	0.0603075
939	2.142	433.814	112	321.814	235.256	110	125.256	0.389219
940	7.437	750.022	112	638.022	558.013	110	448.013	0.702191
941	3.486	501.843	112	389.843	149.314	110	39.314	0.100846
942	2.274	829.774	112	717.774	560.869	110	450.869	0.628149
943	4.433	608.558	112	496.558	255.719	110	145.719	0.293458
944	2.042	508.325	112	396.325	185.122	110	75.122	0.189546
945	2.391	537.701	112	425.701	228.438	110	118.438	0.278219
946	3.005	594.42	112	482.42	161.343	110	51.343	0.106428
947	2.806	669.473	112	557.473	340.024	110	230.024	0.412619
948	2.872	723.393	112	611.393	337.306	110	227.306	0.371784
949	2.175	831.985	112	719.985	345.809	110	235.809	0.327519
950	3.005	414.459	112	302.459	174.713	110	64.713	0.213956
951	4.15	430.808	112	318.808	213.18	110	103.18	0.323643
952	13.829	921.4	112	809.4	639.647	110	529.647	0.65437
953	3.735	830.271	112	718.271	567.587	110	457.587	0.637067
954	2.689	793.179	112	681.179	878.241	110	768.241	1.12781
955	2.208	888.489	112	776.489	789.842	110	679.842	0.875533
956	2.042	525.463	112	413.463	220.358	110	110.358	0.266911
957	3.005	717.055	112	605.055	508	110	398	0.657791
958	3.038	792.366	112	680.366	494.454	110	384.454	0.565069
959	7.537	772.751	112	660.751	312.694	110	202.694	0.306763
960	2.839	851.491	112	739.491	381.813	110	271.813	0.367568
961	7.603	879.714	112	767.714	401.245	110	291.245	0.379367
962	2.889	614.006	112	502.006	550.322	110	440.322	0.877125
963	3.055	551.967	112	439.967	237.457	110	127.457	0.289697
964	3.287	766.217	112	654.217	230.348	110	120.348	0.183957
965	3.851	647.526	112	535.526	339.009	110	229.009	0.427634
966	3.719	658.67	112	546.67	279.504	110	169.504	0.310066
967	2.44	638.32	112	526.32	124.49	110	14.49	0.0275308
968	5.578	483.012	112	371.012	174.789	110	64.789	0.174628
969	3.702	836.906	112	724.906	312.139	110	202.139	0.278849
970	3.885	526.346	112	414.346	299.192	110	189.192	0.456604
971	9.18	805.901	112	693.901	539.255	110	429.255	0.618611
972	5.329	682.505	112	570.505	271.025	110	161.025	0.28225
973	7.022	442.804	112	330.804	186.116	110	76.116	0.230094
974	4.715	815.665	112	703.665	501.303	110	391.303	0.556093
975	5.097	477.782	112	365.782	181.254	110	71.254	0.194799
976	5.528	852.61	112	740.61	519.369	110	409.369	0.552746
977	3.536	605.606	112	493.606	164.484	110	54.484	0.11038
978	2.723	710.11	112	598.11	594.835	110	484.835	0.810612
979	3.287	833.051	112	721.051	498.631	110	388.631	0.538979
980	2.191	696.545	112	584.545	336.379	110	226.379	0.387274
981	4.217	588.441	112	476.441	229.118	110	119.118	0.250016
982	2.042	778.797	112	666.797	373.382	110	263.382	0.394996
983	3.187	588.432	112	476.432	256.099	110	146.099	0.306652
984	3.204	780.161	112	668.161	310.617	110	200.617	0.300252
985	3.121	467.888	112	355.888	203.436	110	93.436	0.262543
986	4.814	563.272	112	451.272	265.907	110	155.907	0.345483
987	3.254	729.821	112	617.821	558.337	110	448.337	0.725675
988	2.905	791.686	112	679.686	213.069	110	103.069	0.151642
989	6.026	747.579	112	635.579	321.358	110	211.358	0.332544
990	6.259	750.623	112	638.623	680.438	110	570.438	0.893231
991	3.802	677.799	112	565.799	217.188	110	107.188	0.189445
992	4.814	774.586	112	662.586	626.272	110	516.272	0.779177
993	4.615	755.86	112	643.86	706.478	110	596.478	0.926409
994	7.388	757.946	112	645.946	383.243	110	273.243	0.423012
995	2.938	744.994	112	632.994	628.876	110	518.876	0.819717
996	4.167	784.661	112	672.661	294.972	110	184.972	0.274985
997	3.901	842.506	112	730.506	385.187	110	275.187	0.376707
998	2.872	394.405	112	282.405	131.63	110	21.63	0.0765921
999	7.172	737.039	112	625.039	380.053	110	270.053	0.432058
1000	5.993	667.945	112	555.945	373.524	110	263.524	0.474011
1001	3.752	415.018	112	303.018	218.367	110	108.367	0.357626
1002	3.486	784.329	112	672.329	674.557	110	564.557	0.839703
1003	13.331	879.564	112	767.564	580.748	110	470.748	0.613301
1004	2.424	626.836	112	514.836	183.726	110	73.726	0.143203
1005	5.478	723.1	112	611.1	386.042	110	276.042	0.451713
1006	8.317	677.679	112	565.679	336.936	110	226.936	0.401175
1007	5.13	604.508	112	492.508	396.686	110	286.686	0.582094
1008	6.076	698.191	112	586.191	324.484	110	214.484	0.365894
1009	8.267	744.41	112	632.41	321.378	110	211.378	0.334242
1010	2.44	641.939	112	529.939	120.728	110	10.728	0.0202438
1011	8.716	647.32	112	535.32	356.827	110	246.827	0.461083
1012	2.374	668.224	112	556.224	189.979	110	79.979	0.143789
1013	5.993	829.291	112	717.291	497.972	110	387.972	0.540885
1014	2.374	592.937	112	480.937	588.741	110	478.741	0.995434
1015	3.868	736.768	112	624.768	363.82	110	253.82	0.406263
1016	2.507	607.828	112	495.828	283.106	110	173.106	0.349125
1017	2.839	709.368	112	597.368	352.52	110	242.52	0.405981
1018	3.138	478.783	112	366.783	217.73	110	107.73	0.293716
1019	4.897	664.939	112	552.939	257.692	110	147.692	0.267104
1020	3.586	721.949	112	609.949	245.977	110	135.977	0.222932
1021	8.085	623.115	112	511.115	335.008	110	225.008	0.44023
1022	2.905	513.897	112	401.897	212.114	110	102.114	0.25408
1023	3.785	646.917	112	534.917	186.715	110	76.715	0.143415
1024	3.768	514.242	112	402.242	191.868	110	81.868	0.203529
1025	2.391	495.09	112	383.09	201.729	110	91.729	0.239445
1026	2.54	689.83	112	577.83	175.68	110	65.68	0.113667
1027	4.1	661.385	112	549.385	192.765	110	82.765	0.15065
1028	5.445	565.982	112	453.982	294.555	110	184.555	0.406525
1029	10.841	694.585	112	582.585	261.521	110	151.521	0.260084
1030	4.034	738.222	112	626.222	485.383	110	375.383	0.599441
1031	6.723	638.328	112	526.328	347.442	110	237.442	0.451129
1032	2.507	497.556	112	385.556	158.066	110	48.066	0.124667
1033	4.134	708.863	112	596.863	394.518	110	284.518	0.476689
1034	4.051	571.734	112	459.734	257.365	110	147.365	0.320544
1035	3.237	543.805	112	431.805	173.046	110	63.046	0.146006
1036	3.503	595.294	112	483.294	274.498	110	164.498	0.340368
1037	7.388	469.98	112	357.98	198.103	110	88.103	0.246112
1038	2.822	551.624	112	439.624	223.194	110	113.194	0.257479
1039	3.387	592.613	112	480.613	432.142	110	322.142	0.670273
1040	4.781	383.497	112	271.497	170.983	110	60.983	0.224618
1041	4.316	558.692	112	446.692	220.477	110	110.477	0.247323
1042	4.648	603.721	112	491.721	263.286	110	153.286	0.311734
1043	5.844	498.631	112	386.631	232.026	110	122.026	0.315614
1044	5.794	591.49	112	479.49	350.777	110	240.777	0.502152
1045	5.279	655.22	112	543.22	250.421	110	140.421	0.258497
1046	3.901	362.068	112	250.068	164.974	110	54.974	0.219836
1047	3.353	376.153	112	264.153	146.386	110	36.386	0.137746
1048	4.2	555.577	112	443.577	315.498	110	205.498	0.463275
1049	4.134	504.317	112	392.317	204.064	110	94.064	0.239765
1050	3.785	455.5	112	343.5	167.048	110	57.048	0.166079
1051	2.308	499.245	112	387.245	146.655	110	36.655	0.0946558
1052	2.424	559.473	112	447.473	232.178	110	122.178	0.27304
1053	15.904	563.078	112	451.078	274.734	110	164.734	0.365201
1054	9.247	611.494	112	499.494	236.944	110	126.944	0.254145
1055	3.619	603.807	112	491.807	324.706	110	214.706	0.436566
1056	12.235	475.066	112	363.066	174.038	110	64.038	0.176381
1057	2.49	561.007	112	449.007	221.98	110	111.98	0.249395
1058	2.142	475.078	112	363.078	234.581	110	124.581	0.343125
1059	7.902	579.502	112	467.502	197.294	110	87.294	0.186724
1060	3.204	468.642	112	356.642	221.145	110	111.145	0.311643
1061	2.706	465.368	112	353.368	173.853	110	63.853	0.180698
1062	7.155	481.118	112	369.118	175.051	110	65.051	0.176234
1063	7.321	559.066	112	447.066	198.694	110	88.694	0.198391
1064	2.606	493.427	112	381.427	344.682	110	234.682	0.615274
1065	4.183	391.091	112	279.091	163.857	110	53.857	0.192973
1066	3.652	480.659	112	368.659	158.264	110	48.264	0.130918
1067	4.1	395.49	112	283.49	159.445	110	49.445	0.174415
1068	15.173	529.458	112	417.458	300.464	110	190.464	0.456247
1069	5.279	495.277	112	383.277	227.066	110	117.066	0.305434
1070	2.191	373.75	112	261.75	183.386	110	73.386	0.280367
1071	2.258	452	112	340	291.368	110	181.368	0.533435
1072	2.009	391.736	112	279.736	205.595	110	95.595	0.341733
1073	2.324	398.764	112	286.764	232.943	110	122.943	0.428725
1074	4.383	436.064	112	324.064	168.254	110	58.254	0.179761
1075	2.955	391.169	112	279.169	127.854	110	17.854	0.0639541
1076	2.988	418.133	112	306.133	168.711	110	58.711	0.191783
1077	11.438	470.206	112	358.206	195.736	110	85.736	0.239348
1078	3.503	432.754	112	320.754	272.36	110	162.36	0.506182
1079	2.258	485.051	112	373.051	162.243	110	52.243	0.140043
1080	2.258	474.882	112	362.882	287.875	110	177.875	0.490173
1081	2.839	412.602	112	300.602	158.708	110	48.708	0.162035
1082	4.283	472.988	112	360.988	229.264	110	119.264	0.330382
1083	3.138	409.931	112	297.931	127.333	110	17.333	0.0581779
1084	2.54	417.549	112	305.549	177.824	110	67.824	0.221974
1085	2.042	376.512	112	264.512	141.423	110	31.423	0.118796
1086	2.291	360.384	112	248.384	134.391	110	24.391	0.0981988
1087	2.026	169.851	103	66.851	186.388	115	71.388	1.06787
1088	2.093	193.464	103	90.464	164.928	115	49.928	0.55191
1089	2.126	182.748	103	79.748	154.402	115	39.402	0.494081
1090	2.159	199.643	103	96.643	124.481	115	9.481	0.0981033
1091	2.159	183.581	103	80.581	122.667	115	7.667	0.0951465
1092	2.159	192.845	103	89.845	141.752	115	26.752	0.297757
1093	2.176	166.708	103	63.708	174.477	115	59.477	0.933588
1094	2.176	219.908	103	116.908	145.108	115	30.108	0.257536
1095	2.21	204.553	103	101.553	163.985	115	48.985	0.482359
1096	2.21	162.152	103	59.152	116.78	115	1.78	0.030092
1097	2.243	196.455	103	93.455	167.784	115	52.784	0.564807
1098	2.277	187.412	103	84.412	133.647	115	18.647	0.220905
1099	2.277	182.618	103	79.618	154.537	115	39.537	0.496584
1100	2.293	199.212	103	96.212	136.46	115	21.46	0.223049
1101	2.344	173.186	103	70.186	139.829	115	24.829	0.35376
1102	2.36	174.454	103	71.454	133.56	115	18.56	0.259748
1103	2.394	198.727	103	95.727	174.028	115	59.028	0.616629
1104	2.394	208.364	103	105.364	131.28	115	16.28	0.154512
1105	2.427	205.628	103	102.628	145.041	115	30.041	0.292717
1106	2.444	193.959	103	90.959	150.671	115	35.671	0.392166
1107	2.444	194.644	103	91.644	160.021	115	45.021	0.49126
1108	2.444	166	103	63	140.534	115	25.534	0.405302
1109	2.561	167.712	103	64.712	147.418	115	32.418	0.500958
1110	2.595	198.129	103	95.129	142.858	115	27.858	0.292844
1111	2.611	156.231	103	53.231	156.327	115	41.327	0.776371
1112	2.628	173.261	103	70.261	130.217	115	15.217	0.216578
1113	2.645	187.987	103	84.987	133.487	115	18.487	0.217527
1114	2.662	165.509	103	62.509	140.723	115	25.723	0.411509
1115	2.678	184.45	103	81.45	127.55	115	12.55	0.154082
1116	2.695	180.919	103	77.919	171.584	115	56.584	0.72619
1117	2.695	177.217	103	74.217	144.77	115	29.77	0.401121
1118	2.712	192.401	103	89.401	150.92	115	35.92	0.401785
1119	2.779	166.205	103	63.205	137.675	115	22.675	0.358753
1120	2.796	197.108	103	94.108	152.15	115	37.15	0.394759
1121	2.812	202.167	103	99.167	189.185	115	74.185	0.748082
1122	2.846	190.1	103	87.1	127.859	115	12.859	0.147635
1123	2.863	195.667	103	92.667	134.076	115	19.076	0.205855
1124	2.896	192.277	103	89.277	186.445	115	71.445	0.800262
1125	2.963	193.011	103	90.011	195.017	115	80.017	0.888969
1126	2.963	198.277	103	95.277	139.492	115	24.492	0.257061
1127	3.063	202.137	103	99.137	131.016	115	16.016	0.161554
1128	3.097	184.465	103	81.465	144.346	115	29.346	0.360228
1129	3.13	200.235	103	97.235	167.888	115	52.888	0.543919
1130	3.181	207.989	103	104.989	170.321	115	55.321	0.526922
1131	3.298	195.584	103	92.584	142.888	115	27.888	0.301218
1132	3.298	178.497	103	75.497	130.274	115	15.274	0.202313
1133	3.382	197.272	103	94.272	172.099	115	57.099	0.605684
1134	3.382	173.931	103	70.931	129.441	115	14.441	0.203592
1135	3.398	182.635	103	79.635	148.369	115	33.369	0.419024
1136	3.432	207.049	103	104.049	246.19	115	131.19	1.26085
1137	3.448	194.631	103	91.631	143.854	115	28.854	0.314893
1138	3.482	194.764	103	91.764	172.861	115	57.861	0.630541
1139	3.515	195.743	103	92.743	139.229	115	24.229	0.261249
1140	3.7	203.511	103	100.511	159.86	115	44.86	0.446319
1141	3.767	201.72	103	98.72	195.253	115	80.253	0.812936
1142	3.8	177.943	103	74.943	132.881	115	17.881	0.238595
1143	3.817	191.605	103	88.605	155.711	115	40.711	0.459466
1144	3.917	202.744	103	99.744	141.991	115	26.991	0.270603
1145	3.934	213.434	103	110.434	178.97	115	63.97	0.57926
1146	4.202	184.45	103	81.45	168.259	115	53.259	0.653886
1147	4.302	205.603	103	102.603	131.615	115	16.615	0.161935
1148	4.436	194.6	103	91.6	149.117	115	34.117	0.372456
1149	4.671	200.305	103	97.305	129.097	115	14.097	0.144874
1150	4.687	199.768	103	96.768	201.264	115	86.264	0.891452
1151	4.754	200.651	103	97.651	169.289	115	54.289	0.555949
1152	4.771	208.07	103	105.07	173.761	115	58.761	0.559256
1153	4.838	170.945	103	67.945	128.682	115	13.682	0.201369
1154	5.056	195.788	103	92.788	161.897	115	46.897	0.505421
1155	5.106	192.826	103	89.826	138.915	115	23.915	0.266237
1156	5.123	180.546	103	77.546	133.02	115	18.02	0.232378
1157	5.223	195.657	103	92.657	137.304	115	22.304	0.240716
1158	5.24	212.329	103	109.329	168.38	115	53.38	0.488251
1159	5.441	209.055	103	106.055	168.551	115	53.551	0.504936
1160	5.491	189.805	103	86.805	134.784	115	19.784	0.227913
1161	5.575	204.64	103	101.64	159.898	115	44.898	0.441736
1162	5.641	190.929	103	87.929	128.979	115	13.979	0.158981
1163	5.976	186.625	103	83.625	138.188	115	23.188	0.277286
1164	6.412	196.332	103	93.332	204.94	115	89.94	0.963657
1165	6.864	192.302	103	89.302	130.461	115	15.461	0.173132
1166	6.964	197.329	103	94.329	143.142	115	28.142	0.298339
1167	7.131	198.662	103	95.662	143.622	115	28.622	0.299199
1168	7.198	189.767	103	86.767	247.963	115	132.963	1.53241
1169	7.232	186.419	103	83.419	140.854	115	25.854	0.309929
1170	7.717	200.874	103	97.874	208.967	115	93.967	0.960081
1171	7.885	202.915	103	99.915	176.522	115	61.522	0.615743
1172	7.985	194.312	103	91.312	129.908	115	14.908	0.163264
1173	8.102	204.12	103	101.12	134.492	115	19.492	0.192761
1174	11.668	201.832	103	98.832	153.044	115	38.044	0.384936
1175	12.572	202.675	103	99.675	156.792	115	41.792	0.419283

## Sheet: augmin + TPX2 + gTuRC
Microtubule	Area (um^2)	Mean TB intensity	Alexa568 background intensity	Mean minus background	Mean gTuRC intensity	Alexa647 background intensity	Mean minus background	gTuRC/TB intensity
1	4.3	397.32	116	281.32	180.548	107	73.548	0.261439
2	2.474	409.47	116	293.47	160.946	107	53.946	0.183821
3	6.541	446.376	116	330.376	178.206	107	71.206	0.21553
4	2.706	491.988	116	375.988	228.994	107	121.994	0.324462
5	5.528	475.511	116	359.511	209.973	107	102.973	0.286425
6	8.981	503.895	116	387.895	257.067	107	150.067	0.386875
7	2.025	505.951	116	389.951	227.705	107	120.705	0.309539
8	4.117	416.125	116	300.125	156.137	107	49.137	0.163722
9	3.221	496.088	116	380.088	231.861	107	124.861	0.328506
10	3.138	512.492	116	396.492	272.476	107	165.476	0.41735
11	2.855	474.267	116	358.267	163.651	107	56.651	0.158125
12	2.108	592.071	116	476.071	307.811	107	200.811	0.421809
13	2.374	508.573	116	392.573	216.105	107	109.105	0.277923
14	4.017	597.38	116	481.38	264.483	107	157.483	0.327149
15	2.391	464.278	116	348.278	184.611	107	77.611	0.222842
16	2.54	473.686	116	357.686	320.758	107	213.758	0.597614
17	2.025	545.049	116	429.049	472.885	107	365.885	0.852781
18	4.051	595.898	116	479.898	310.992	107	203.992	0.425074
19	3.785	948.868	116	832.868	350.535	107	243.535	0.292405
20	7.487	564.643	116	448.643	244.457	107	137.457	0.306384
21	2.706	540.325	116	424.325	216.939	107	109.939	0.259091
22	2.573	543.019	116	427.019	197.161	107	90.161	0.21114
23	3.387	623.833	116	507.833	323.446	107	216.446	0.426215
24	2.457	573.642	116	457.642	292.547	107	185.547	0.405441
25	4.765	558.533	116	442.533	324.836	107	217.836	0.492248
26	3.038	629.934	116	513.934	212.858	107	105.858	0.205976
27	2.374	563.874	116	447.874	260.322	107	153.322	0.342333
28	2.291	587.906	116	471.906	205.449	107	98.449	0.20862
29	2.673	415.807	116	299.807	138.385	107	31.385	0.104684
30	2.357	423.775	116	307.775	169.838	107	62.838	0.204169
31	2.739	605.394	116	489.394	359.867	107	252.867	0.516694
32	9.496	645.844	116	529.844	273.371	107	166.371	0.314
33	5.628	626.853	116	510.853	235.838	107	128.838	0.252202
34	4.781	510.51	116	394.51	274.108	107	167.108	0.423584
35	4.167	613.398	116	497.398	285.227	107	178.227	0.358319
36	3.968	545.849	116	429.849	272.9	107	165.9	0.385949
37	3.287	547.803	116	431.803	212.909	107	105.909	0.245272
38	5.711	482.997	116	366.997	297.183	107	190.183	0.518214
39	2.175	682.412	116	566.412	238.954	107	131.954	0.232965
40	2.357	706.014	116	590.014	433.655	107	326.655	0.553639
41	2.507	465.682	116	349.682	198.238	107	91.238	0.260917
42	4.134	688.51	116	572.51	504.594	107	397.594	0.694475
43	3.536	607.526	116	491.526	334.545	107	227.545	0.462936
44	2.772	623.659	116	507.659	359.695	107	252.695	0.497765
45	5.561	652.197	116	536.197	350.582	107	243.582	0.454277
46	5.545	606.38	116	490.38	278.817	107	171.817	0.350375
47	5.329	669.439	116	553.439	282.872	107	175.872	0.31778
48	11.87	826.062	116	710.062	425.186	107	318.186	0.44811
49	2.972	648.179	116	532.179	283.81	107	176.81	0.332238
50	5.412	628.113	116	512.113	219.54	107	112.54	0.219756
51	5.943	711.76	116	595.76	343.344	107	236.344	0.39671
52	3.785	632.044	116	516.044	368.732	107	261.732	0.507189
53	5.445	599.534	116	483.534	387.884	107	280.884	0.580898
54	2.042	643.715	116	527.715	186.268	107	79.268	0.15021
55	2.64	391.78	116	275.78	170.346	107	63.346	0.229698
56	2.274	561.35	116	445.35	281.387	107	174.387	0.391573
57	2.789	613.435	116	497.435	248.542	107	141.542	0.284544
58	8.898	525.703	116	409.703	239	107	132	0.322185
59	2.49	725.46	116	609.46	997.54	107	890.54	1.4612
60	8.716	770.013	116	654.013	487.101	107	380.101	0.581183
61	2.689	535.698	116	419.698	199.235	107	92.235	0.219765
62	3.055	494.918	116	378.918	164.848	107	57.848	0.152666
63	3.685	792.937	116	676.937	573.387	107	466.387	0.688967
64	7.62	754.837	116	638.837	625.647	107	518.647	0.811861
65	6.408	807.409	116	691.409	639.578	107	532.578	0.770279
66	3.503	459.758	116	343.758	204.408	107	97.408	0.283362
67	2.855	573.802	116	457.802	242.395	107	135.395	0.29575
68	2.424	622.808	116	506.808	271.034	107	164.034	0.323661
69	11.372	786.58	116	670.58	315.181	107	208.181	0.310449
70	2.208	582.075	116	466.075	498.624	107	391.624	0.84026
71	2.606	680.586	116	564.586	543.28	107	436.28	0.772743
72	4.665	768.274	116	652.274	530.327	107	423.327	0.649002
73	5.063	466.072	116	350.072	248.079	107	141.079	0.403
74	4.565	682.942	116	566.942	292.324	107	185.324	0.326884
75	3.851	561.444	116	445.444	295.836	107	188.836	0.423928
76	3.237	791.297	116	675.297	612.046	107	505.046	0.747887
77	2.64	676.528	116	560.528	419.868	107	312.868	0.558167
78	3.719	712.165	116	596.165	709.036	107	602.036	1.00985
79	5.18	737.878	116	621.878	569.702	107	462.702	0.74404
80	4.233	618.867	116	502.867	367.31	107	260.31	0.517652
81	3.536	750.845	116	634.845	534.653	107	427.653	0.673634
82	9.114	680.29	116	564.29	441.27	107	334.27	0.592373
83	5.312	805.934	116	689.934	659.394	107	552.394	0.800648
84	3.436	615.667	116	499.667	301.213	107	194.213	0.388685
85	4.266	482.105	116	366.105	170.245	107	63.245	0.172751
86	2.125	537.312	116	421.312	507.516	107	400.516	0.95064
87	4.582	748.127	116	632.127	854.105	107	747.105	1.18189
88	14.144	796.675	116	680.675	435.543	107	328.543	0.482672
89	3.403	856.785	116	740.785	474.878	107	367.878	0.496606
90	3.337	631.025	116	515.025	275.731	107	168.731	0.327617
91	4.266	587.089	116	471.089	322.043	107	215.043	0.456481
92	2.175	699.153	116	583.153	397.229	107	290.229	0.497689
93	4.167	654.861	116	538.861	268.805	107	161.805	0.300272
94	2.573	579.89	116	463.89	374.716	107	267.716	0.577111
95	2.889	703.632	116	587.632	655.879	107	548.879	0.934052
96	6.342	458.204	116	342.204	193.147	107	86.147	0.251742
97	5.661	637.865	116	521.865	462.651	107	355.651	0.6815
98	3.304	781.437	116	665.437	578.226	107	471.226	0.708145
99	2.839	713.047	116	597.047	489.795	107	382.795	0.641147
100	2.557	525.903	116	409.903	498.455	107	391.455	0.954994
101	8.234	834.996	116	718.996	615.244	107	508.244	0.70688
102	2.739	737.158	116	621.158	280.582	107	173.582	0.279449
103	2.474	758.295	116	642.295	356.604	107	249.604	0.388613
104	3.735	670.8	116	554.8	323.964	107	216.964	0.391067
105	2.822	709.9	116	593.9	627.8	107	520.8	0.876915
106	9.131	807.156	116	691.156	752.187	107	645.187	0.93349
107	11.488	852.393	116	736.393	710.082	107	603.082	0.818968
108	3.619	849.482	116	733.482	686.028	107	579.028	0.789424
109	5.379	805.299	116	689.299	604.586	107	497.586	0.721873
110	7.338	606.36	116	490.36	243.923	107	136.923	0.27923
111	9.844	742.447	116	626.447	605.88	107	498.88	0.796364
112	2.092	744.238	116	628.238	750.667	107	643.667	1.02456
113	8.832	849.759	116	733.759	491.023	107	384.023	0.523364
114	2.54	559.614	116	443.614	318.908	107	211.908	0.477686
115	3.021	793.544	116	677.544	458.907	107	351.907	0.519386
116	3.27	590.513	116	474.513	435.431	107	328.431	0.692143
117	7.404	739.233	116	623.233	503.027	107	396.027	0.63544
118	8.035	848.285	116	732.285	449.149	107	342.149	0.467235
119	10.027	851.664	116	735.664	679.194	107	572.194	0.777793
120	4.798	670.035	116	554.035	433.308	107	326.308	0.588966
121	6.225	550.651	116	434.651	252.557	107	145.557	0.334882
122	2.142	379.558	116	263.558	168.674	107	61.674	0.234005
123	4.715	797.38	116	681.38	547.063	107	440.063	0.645841
124	13.115	870.182	116	754.182	609.838	107	502.838	0.666733
125	2.025	592.344	116	476.344	366.754	107	259.754	0.545308
126	2.092	581.984	116	465.984	480.484	107	373.484	0.801495
127	2.208	722.451	116	606.451	408.624	107	301.624	0.497359
128	6.159	820.73	116	704.73	259.299	107	152.299	0.21611
129	5.561	748.71	116	632.71	736.173	107	629.173	0.99441
130	4.615	769.597	116	653.597	713.906	107	606.906	0.928563
131	4.798	634.675	116	518.675	591.917	107	484.917	0.934915
132	4.632	762.401	116	646.401	595.204	107	488.204	0.755265
133	3.221	690.103	116	574.103	388.273	107	281.273	0.489935
134	3.968	818.335	116	702.335	496.862	107	389.862	0.555094
135	2.308	744.604	116	628.604	506.784	107	399.784	0.635987
136	5.545	640.314	116	524.314	394.123	107	287.123	0.547617
137	3.154	677.874	116	561.874	323.784	107	216.784	0.385823
138	8.035	654.424	116	538.424	455.87	107	348.87	0.647947
139	4.864	802.167	116	686.167	318.174	107	211.174	0.307759
140	3.403	416.693	116	300.693	175.868	107	68.868	0.229031
141	7.554	809.244	116	693.244	953.633	107	846.633	1.22126
142	2.905	721.777	116	605.777	642.286	107	535.286	0.883635
143	2.938	663.989	116	547.989	297.198	107	190.198	0.347084
144	2.557	773.292	116	657.292	775.812	107	668.812	1.01753
145	3.237	745.19	116	629.19	492.231	107	385.231	0.612265
146	6.275	799.455	116	683.455	511.884	107	404.884	0.592408
147	2.274	734.051	116	618.051	705.307	107	598.307	0.968054
148	3.586	447.412	116	331.412	216.296	107	109.296	0.329789
149	2.557	471.143	116	355.143	265.948	107	158.948	0.447561
150	4.117	755.806	116	639.806	542.75	107	435.75	0.681066
151	6.458	754.91	116	638.91	527.177	107	420.177	0.657647
152	5.578	790.101	116	674.101	629.199	107	522.199	0.77466
153	3.104	394.936	116	278.936	178.775	107	71.775	0.257317
154	3.519	602.896	116	486.896	380.632	107	273.632	0.561993
155	5.893	567.865	116	451.865	335.166	107	228.166	0.504943
156	2.225	607.448	116	491.448	504.56	107	397.56	0.808956
157	16.004	803.468	116	687.468	512.619	107	405.619	0.590019
158	24.686	729.374	116	613.374	461.946	107	354.946	0.578678
159	7.786	634.175	116	518.175	303.629	107	196.629	0.379464
160	2.839	498.55	116	382.55	267.281	107	160.281	0.418981
161	5.761	670.974	116	554.974	642.38	107	535.38	0.964694
162	5.362	805.907	116	689.907	436.13	107	329.13	0.477064
163	3.204	678.238	116	562.238	576.793	107	469.793	0.835577
164	6.159	718.625	116	602.625	489.167	107	382.167	0.634171
165	4.134	491.831	116	375.831	169.161	107	62.161	0.165396
166	3.602	420.419	116	304.419	157.498	107	50.498	0.165883
167	6.723	670.351	116	554.351	473.015	107	366.015	0.660259
168	5.844	770.324	116	654.324	601.08	107	494.08	0.7551
169	3.353	439.193	116	323.193	218.04	107	111.04	0.343572
170	7.354	545.677	116	429.677	423.255	107	316.255	0.73603
171	4.001	695.506	116	579.506	425.116	107	318.116	0.548943
172	4.233	727.894	116	611.894	661.106	107	554.106	0.905559
173	2.291	455.043	116	339.043	199.841	107	92.841	0.273833
174	2.806	722.249	116	606.249	374.959	107	267.959	0.441995
175	3.055	413.663	116	297.663	153.424	107	46.424	0.155962
176	5.014	658.507	116	542.507	593.884	107	486.884	0.89747
177	4.233	597.063	116	481.063	418.435	107	311.435	0.647389
178	4.632	559.079	116	443.079	490.405	107	383.405	0.86532
179	8.4	587.281	116	471.281	385.919	107	278.919	0.591832
180	4.831	667.67	116	551.67	340.711	107	233.711	0.423643
181	2.474	376.779	116	260.779	214.409	107	107.409	0.411877
182	3.27	605.193	116	489.193	315.228	107	208.228	0.425656
183	4.25	512.855	116	396.855	182.258	107	75.258	0.189636
184	2.49	600.12	116	484.12	218.507	107	111.507	0.230329
185	2.457	507.142	116	391.142	423.351	107	316.351	0.808788
186	4.466	510.937	116	394.937	253.401	107	146.401	0.370695
187	3.785	556.434	116	440.434	311.689	107	204.689	0.464744
188	6.889	598.894	116	482.894	389.482	107	282.482	0.584977
189	4.316	692	116	576	762.912	107	655.912	1.13874
190	5.611	393.29	116	277.29	242.891	107	135.891	0.490068
191	2.64	632.025	116	516.025	737.126	107	630.126	1.22112
192	2.274	570.555	116	454.555	339.263	107	232.263	0.510968
193	3.934	638.667	116	522.667	266.414	107	159.414	0.305001
194	6.84	566.364	116	450.364	271.376	107	164.376	0.364985
195	7.139	563.944	116	447.944	245.891	107	138.891	0.310063
196	3.071	438.254	116	322.254	217.005	107	110.005	0.341361
197	3.121	684.564	116	568.564	735.495	107	628.495	1.10541
198	5.346	564.689	116	448.689	365.876	107	258.876	0.576961
199	2.872	619.104	116	503.104	280.688	107	173.688	0.345233
200	4.117	382.218	116	266.218	178.185	107	71.185	0.267394
201	7.703	524.866	116	408.866	335.131	107	228.131	0.55796
202	3.868	633.833	116	517.833	538.472	107	431.472	0.833226
203	4.051	516.381	116	400.381	336.746	107	229.746	0.573818
204	2.573	404.226	116	288.226	189.11	107	82.11	0.284881
205	3.37	401.813	116	285.813	171.394	107	64.394	0.225301
206	11.272	604.175	116	488.175	279.374	107	172.374	0.353099
207	3.519	571.873	116	455.873	413.618	107	306.618	0.672595
208	7.919	589.21	116	473.21	398.698	107	291.698	0.616424
209	3.204	464.135	116	348.135	224.316	107	117.316	0.336984
210	4.997	423.631	116	307.631	158.362	107	51.362	0.16696
211	3.685	583.135	116	467.135	249.302	107	142.302	0.304627
212	8.749	551.66	116	435.66	322.114	107	215.114	0.493766
213	4.466	456.257	116	340.257	232.082	107	125.082	0.36761
214	6.192	588.82	116	472.82	210.582	107	103.582	0.219073
215	2.64	545.157	116	429.157	342.453	107	235.453	0.548641
216	3.021	560.742	116	444.742	235.764	107	128.764	0.289525
217	2.407	675.448	116	559.448	545.834	107	438.834	0.784405
218	5.097	480.912	116	364.912	483.45	107	376.45	1.03162
219	5.595	583.285	116	467.285	209.754	107	102.754	0.219896
220	2.274	454.285	116	338.285	198.102	107	91.102	0.269305
221	4.715	518.944	116	402.944	278.989	107	171.989	0.426831
222	4.798	550.087	116	434.087	351.941	107	244.941	0.564267
223	6.026	530.149	116	414.149	281.623	107	174.623	0.421643
224	3.984	532.892	116	416.892	352.488	107	245.488	0.588853
225	10.957	438.464	116	322.464	211.652	107	104.652	0.324539
226	3.42	442.228	116	326.228	289.539	107	182.539	0.559544
227	9.263	579.729	116	463.729	303.538	107	196.538	0.423821
228	3.071	518.341	116	402.341	322.622	107	215.622	0.535919
229	2.573	495.116	116	379.116	271.077	107	164.077	0.432788
230	5.395	444.378	116	328.378	272.585	107	165.585	0.504251
231	3.37	574.089	116	458.089	291.192	107	184.192	0.402088
232	2.988	492.006	116	376.006	178.272	107	71.272	0.18955
233	2.872	527.497	116	411.497	214.809	107	107.809	0.261992
234	7.952	496.537	116	380.537	250.157	107	143.157	0.376197
235	4.947	388.936	116	272.936	180.718	107	73.718	0.270093
236	4.482	479.581	116	363.581	203.815	107	96.815	0.266282
237	5.429	472.716	116	356.716	147.098	107	40.098	0.112409
238	7.653	457.482	116	341.482	222.991	107	115.991	0.339669
239	4.798	416.118	116	300.118	200.682	107	93.682	0.312151
240	3.088	392.151	116	276.151	257.113	107	150.113	0.54359
241	8.135	504.849	116	388.849	292.153	107	185.153	0.476157
242	2.092	448.381	116	332.381	165.73	107	58.73	0.176695
243	3.685	494.842	116	378.842	335.342	107	228.342	0.602737
244	2.54	473.654	116	357.654	249.033	107	142.033	0.397124
245	9.263	472.016	116	356.016	226.645	107	119.645	0.336066
246	2.872	407.624	116	291.624	326.902	107	219.902	0.75406
247	4.632	506.305	116	390.305	332.656	107	225.656	0.578153
248	2.855	438.401	116	322.401	198.169	107	91.169	0.282781
249	2.092	429.5	116	313.5	244.865	107	137.865	0.439761
250	3.038	371.798	116	255.798	173.989	107	66.989	0.261882
251	2.789	502.345	116	386.345	306.274	107	199.274	0.515793
252	2.839	405.778	116	289.778	236.848	107	129.848	0.448095
253	2.042	394.26	116	278.26	172.057	107	65.057	0.233799
254	3.968	445.741	116	329.741	148.954	107	41.954	0.127233
255	4.964	452.575	116	336.575	154.244	107	47.244	0.140367
256	3.088	515.543	116	399.543	251.296	107	144.296	0.361153
257	3.121	443.612	116	327.612	183.287	107	76.287	0.232858
258	6.491	482.343	116	366.343	205.757	107	98.757	0.269575
259	3.005	424.718	116	308.718	208.912	107	101.912	0.330114
260	3.403	501.776	116	385.776	194.254	107	87.254	0.226178
261	3.569	441.777	116	325.777	194.447	107	87.447	0.268426
262	3.868	504.206	116	388.206	181.219	107	74.219	0.191185
263	2.125	564.656	116	448.656	171.68	107	64.68	0.144164
264	2.922	477.108	116	361.108	254.824	107	147.824	0.409362
265	18.494	548.885	116	432.885	219.837	107	112.837	0.260663
266	4.565	494.527	116	378.527	280.178	107	173.178	0.457505
267	3.154	494.9	116	378.9	268.416	107	161.416	0.426012
268	2.357	531.169	116	415.169	163.986	107	56.986	0.13726
269	2.374	425.986	116	309.986	206.315	107	99.315	0.320385
270	2.059	457.274	116	341.274	225.266	107	118.266	0.346543
271	6.076	554.563	116	438.563	250.104	107	143.104	0.326302
272	2.258	391.176	116	275.176	192.324	107	85.324	0.310071
273	2.142	458.969	116	342.969	313.271	107	206.271	0.601428
274	2.474	609.289	116	493.289	252.577	107	145.577	0.295115
275	6.939	517.737	116	401.737	203.768	107	96.768	0.240874
276	2.59	484.16	116	368.16	271.429	107	164.429	0.446624
277	3.237	604.379	116	488.379	325.185	107	218.185	0.446753
278	7.255	609.558	116	493.558	299.659	107	192.659	0.390347
279	5.279	427.277	116	311.277	207.475	107	100.475	0.322783
280	2.125	610.094	116	494.094	371.328	107	264.328	0.534975
281	2.308	590.086	116	474.086	456.82	107	349.82	0.737883
282	4.931	454.32	116	338.32	253.593	107	146.593	0.433297
283	3.802	462.463	116	346.463	182.048	107	75.048	0.216612
284	3.818	591.878	116	475.878	293.052	107	186.052	0.390966
285	3.021	566.709	116	450.709	183.725	107	76.725	0.170232
286	4.665	520.221	116	404.221	265.701	107	158.701	0.392609
287	3.121	569.729	116	453.729	232.606	107	125.606	0.27683
288	4.017	527.781	116	411.781	228.624	107	121.624	0.295361
289	2.291	510.333	116	394.333	303.674	107	196.674	0.498751
290	2.324	583.85	116	467.85	251.129	107	144.129	0.308067
291	3.121	576.702	116	460.702	302.17	107	195.17	0.423636
292	7.022	487.421	116	371.421	261.043	107	154.043	0.41474
293	5.163	401.45	116	285.45	261.257	107	154.257	0.540399
294	2.042	422.724	116	306.724	155.545	107	48.545	0.158269
295	5.528	552.964	116	436.964	276.441	107	169.441	0.387769
296	4.051	514.385	116	398.385	344.184	107	237.184	0.595364
297	4.1	556.368	116	440.368	265.368	107	158.368	0.359626
298	3.968	634.18	116	518.18	339.293	107	232.293	0.448286
299	3.038	495.645	116	379.645	209.995	107	102.995	0.271293
300	4.466	710.717	116	594.717	599.859	107	492.859	0.828729
301	2.938	708.384	116	592.384	411.944	107	304.944	0.514774
302	4.117	618.931	116	502.931	375.371	107	268.371	0.533614
303	3.851	529.483	116	413.483	252.935	107	145.935	0.352941
304	4.001	559.303	116	443.303	377.274	107	270.274	0.609682
305	3.735	604.556	116	488.556	454.329	107	347.329	0.71093
306	2.142	565.202	116	449.202	290.054	107	183.054	0.407509
307	2.042	458.122	116	342.122	274.626	107	167.626	0.48996
308	2.49	499.54	116	383.54	193.167	107	86.167	0.224662
309	2.059	523.548	116	407.548	265.742	107	158.742	0.389505
310	2.175	663.359	116	547.359	305.008	107	198.008	0.361752
311	3.536	587.742	116	471.742	254.836	107	147.836	0.313383
312	2.025	500.139	116	384.139	455.008	107	348.008	0.905943
313	7.703	675.55	116	559.55	303.164	107	196.164	0.350575
314	3.785	612.947	116	496.947	342.079	107	235.079	0.473046
315	4.449	608.493	116	492.493	373.586	107	266.586	0.541299
316	2.092	509.913	116	393.913	261.397	107	154.397	0.391957
317	2.274	633.81	116	517.81	492.066	107	385.066	0.743643
318	4.781	620.361	116	504.361	337.285	107	230.285	0.456588
319	7.57	725.211	116	609.211	447.702	107	340.702	0.559251
320	3.885	563.607	116	447.607	186.786	107	79.786	0.17825
321	6.126	680.293	116	564.293	378.81	107	271.81	0.481682
322	3.702	444.229	116	328.229	200.964	107	93.964	0.286276
323	2.407	610.186	116	494.186	383.966	107	276.966	0.560449
324	3.519	812.033	116	696.033	437.396	107	330.396	0.474684
325	4.051	774.82	116	658.82	297.418	107	190.418	0.289029
326	3.669	625.095	116	509.095	364.683	107	257.683	0.506159
327	3.503	427.232	116	311.232	274.19	107	167.19	0.537188
328	6.093	814.741	116	698.741	615.207	107	508.207	0.727318
329	3.735	666.382	116	550.382	369.689	107	262.689	0.477285
330	3.138	489.492	116	373.492	458.847	107	351.847	0.942047
331	3.42	450.388	116	334.388	252.927	107	145.927	0.4364
332	2.557	408.305	116	292.305	263.688	107	156.688	0.536043
333	2.357	401.676	116	285.676	157.169	107	50.169	0.175615
334	4.001	667.842	116	551.842	566.606	107	459.606	0.832858
335	2.706	667.049	116	551.049	322.902	107	215.902	0.391802
336	2.49	767.467	116	651.467	456.907	107	349.907	0.537106
337	2.274	474.35	116	358.35	333.985	107	226.985	0.633417
338	4.98	789.597	116	673.597	638.823	107	531.823	0.789527
339	5.113	623.594	116	507.594	215.61	107	108.61	0.21397
340	2.988	645.378	116	529.378	397.211	107	290.211	0.548211
341	4.682	947.085	116	831.085	740.294	107	633.294	0.762009
342	4.25	705.578	116	589.578	403.457	107	296.457	0.502829
343	7.271	539.575	116	423.575	349.575	107	242.575	0.572685
344	2.806	693.337	116	577.337	522.562	107	415.562	0.719791
345	12.484	694.464	116	578.464	383.48	107	276.48	0.477955
346	3.187	527.182	116	411.182	276.641	107	169.641	0.412569
347	3.055	652.853	116	536.853	445.728	107	338.728	0.630951
348	5.163	722.373	116	606.373	525.354	107	418.354	0.689928
349	2.706	764.337	116	648.337	787.184	107	680.184	1.04912
350	5.91	603.975	116	487.975	352.924	107	245.924	0.503968
351	4.864	695.147	116	579.147	422.73	107	315.73	0.545164
352	3.47	748.469	116	632.469	351.617	107	244.617	0.386765
353	3.071	745.627	116	629.627	536.935	107	429.935	0.682841
354	5.229	738.419	116	622.419	832.914	107	725.914	1.16628
355	3.403	479.893	116	363.893	217.717	107	110.717	0.304257
356	5.528	741.174	116	625.174	325.898	107	218.898	0.350139
357	9.463	693.756	116	577.756	456.221	107	349.221	0.604444
358	2.474	724.839	116	608.839	617.577	107	510.577	0.838608
359	4.399	783.585	116	667.585	742.615	107	635.615	0.952111
360	4.117	728.484	116	612.484	657.742	107	550.742	0.899194
361	3.619	723.904	116	607.904	457.445	107	350.445	0.576481
362	2.557	816.234	116	700.234	739.123	107	632.123	0.902731
363	2.308	681.863	116	565.863	366.108	107	259.108	0.457899
364	2.64	491.27	116	375.27	235.296	107	128.296	0.341877
365	3.387	778.75	116	662.75	569.48	107	462.48	0.69782
366	10.758	609.233	116	493.233	282.301	107	175.301	0.355412
367	2.258	747.125	116	631.125	795.331	107	688.331	1.09064
368	10.94	500.273	116	384.273	306.715	107	199.715	0.519722
369	3.553	764.752	116	648.752	537.743	107	430.743	0.663956
370	4.665	483.249	116	367.249	254.438	107	147.438	0.401466
371	6.408	855.86	116	739.86	436.233	107	329.233	0.444994
372	3.519	655.703	116	539.703	672.302	107	565.302	1.04743
373	2.623	562.949	116	446.949	319.639	107	212.639	0.475757
374	4.067	464.551	116	348.551	219.38	107	112.38	0.322421
375	5.329	557.062	116	441.062	866.944	107	759.944	1.72299
376	2.972	740.927	116	624.927	719.989	107	612.989	0.980897
377	2.474	449.067	116	333.067	185.174	107	78.174	0.23471
378	13.547	898.73	116	782.73	571.277	107	464.277	0.593151
379	5.18	762.481	116	646.481	686.67	107	579.67	0.896654
380	6.972	792.667	116	676.667	586.905	107	479.905	0.709219
381	3.752	830.456	116	714.456	781.929	107	674.929	0.944675
382	8.948	804.479	116	688.479	561.929	107	454.929	0.660774
383	4.067	707.412	116	591.412	458.857	107	351.857	0.594944
384	3.918	715.229	116	599.229	426.538	107	319.538	0.533249
385	6.458	828.697	116	712.697	552.005	107	445.005	0.624396
386	3.602	453.046	116	337.046	201.636	107	94.636	0.280781
387	4.516	606.338	116	490.338	408.676	107	301.676	0.615241
388	3.038	706.568	116	590.568	400.721	107	293.721	0.497353
389	5.296	804.787	116	688.787	726.467	107	619.467	0.899359
390	4.997	755.99	116	639.99	568.023	107	461.023	0.72036
391	2.042	403.976	116	287.976	195.463	107	88.463	0.307189
392	3.602	601.23	116	485.23	276.078	107	169.078	0.348449
393	7.288	416.303	116	300.303	255.139	107	148.139	0.493298
394	5.163	789.129	116	673.129	514.482	107	407.482	0.605355
395	3.171	704.77	116	588.77	696.487	107	589.487	1.00122
396	8.068	750.698	116	634.698	325.348	107	218.348	0.344019
397	3.934	423.717	116	307.717	223.152	107	116.152	0.377464
398	3.951	762.626	116	646.626	697.256	107	590.256	0.912824
399	3.918	606.962	116	490.962	290.64	107	183.64	0.374041
400	5.246	645.487	116	529.487	377.902	107	270.902	0.511631
401	3.636	418.753	116	302.753	156.114	107	49.114	0.162225
402	2.391	766.292	116	650.292	409.361	107	302.361	0.464962
403	2.142	415.411	116	299.411	190.411	107	83.411	0.278584
404	4.416	574.47	116	458.47	293.808	107	186.808	0.40746
405	2.291	545.5	116	429.5	281.957	107	174.957	0.40735
406	2.424	655.555	116	539.555	365.377	107	258.377	0.478871
407	3.221	649.835	116	533.835	335.17	107	228.17	0.427417
408	3.27	733.751	116	617.751	942.701	107	835.701	1.35281
409	4.864	775.065	116	659.065	441.266	107	334.266	0.507182
410	19.672	827.243	116	711.243	764.222	107	657.222	0.924047
411	5.18	511.532	116	395.532	274.583	107	167.583	0.42369
412	6.491	764.389	116	648.389	725.01	107	618.01	0.953147
413	4.698	814.572	116	698.572	464.534	107	357.534	0.511807
414	2.324	388.664	116	272.664	236.05	107	129.05	0.473293
415	2.855	632.581	116	516.581	507.134	107	400.134	0.774581
416	2.241	771.689	116	655.689	535.896	107	428.896	0.654115
417	5.362	715.344	116	599.344	683.167	107	576.167	0.961329
418	3.885	671.859	116	555.859	575.085	107	468.085	0.842093
419	6.607	510.761	116	394.761	294.008	107	187.008	0.473725
420	2.424	667.555	116	551.555	612.068	107	505.068	0.915716
421	3.918	737.691	116	621.691	720.347	107	613.347	0.986579
422	2.739	771.327	116	655.327	368.861	107	261.861	0.399588
423	2.739	731.188	116	615.188	270.085	107	163.085	0.265098
424	2.125	668	116	552	639.195	107	532.195	0.964121
425	5.478	619.47	116	503.47	349.503	107	242.503	0.481663
426	3.171	714.534	116	598.534	343.398	107	236.398	0.394962
427	6.491	700.159	116	584.159	845.133	107	738.133	1.26358
428	3.171	633.743	116	517.743	574	107	467	0.901992
429	3.519	622.184	116	506.184	310.274	107	203.274	0.401581
430	4.648	750.364	116	634.364	810.554	107	703.554	1.10907
431	3.685	697.977	116	581.977	562.167	107	455.167	0.782105
432	3.818	753.022	116	637.022	536.048	107	429.048	0.673521
433	17.332	859.205	116	743.205	576.815	107	469.815	0.632147
434	2.175	494.42	116	378.42	289.321	107	182.321	0.481795
435	3.436	560.271	116	444.271	193.918	107	86.918	0.195642
436	7.222	625.418	116	509.418	412.72	107	305.72	0.600136
437	4.466	656.301	116	540.301	511.316	107	404.316	0.748316
438	2.889	692.339	116	576.339	350.006	107	243.006	0.421637
439	6.109	793.951	116	677.951	439.207	107	332.207	0.490016
440	2.673	648.497	116	532.497	394.112	107	287.112	0.539181
441	10.077	597.445	116	481.445	577.018	107	470.018	0.976265
442	4.217	707.075	116	591.075	326.146	107	219.146	0.370758
443	8.998	734.157	116	618.157	536.518	107	429.518	0.694836
444	5.13	714.327	116	598.327	524.638	107	417.638	0.69801
445	2.573	635.613	116	519.613	712.026	107	605.026	1.16438
446	4.1	654.672	116	538.672	560.656	107	453.656	0.842175
447	4.266	717.926	116	601.926	456.362	107	349.362	0.580407
448	4.067	601.241	116	485.241	631.135	107	524.135	1.08015
449	3.187	601.12	116	485.12	329.307	107	222.307	0.458252
450	3.204	521.171	116	405.171	443.772	107	336.772	0.831185
451	2.357	642.113	116	526.113	796.866	107	689.866	1.31125
452	2.025	430.975	116	314.975	217.902	107	110.902	0.352098
453	2.075	533.192	116	417.192	376.248	107	269.248	0.645382
454	22.246	558.41	116	442.41	402.522	107	295.522	0.667982
455	3.486	612.271	116	496.271	387.657	107	280.657	0.565532
456	4.466	629.335	116	513.335	336.862	107	229.862	0.447782
457	3.055	485.832	116	369.832	208.109	107	101.109	0.273392
458	4.665	566.157	116	450.157	310.48	107	203.48	0.45202
459	3.984	509.754	116	393.754	271.146	107	164.146	0.416874
460	7.852	642.643	116	526.643	360.848	107	253.848	0.482012
461	3.636	632.338	116	516.338	338.584	107	231.584	0.448512
462	2.374	512.874	116	396.874	301.741	107	194.741	0.490687
463	4.15	632.04	116	516.04	292.676	107	185.676	0.359809
464	2.009	485.678	116	369.678	509.504	107	402.504	1.0888
465	2.44	373.497	116	257.497	206.136	107	99.136	0.384999
466	5.362	632.675	116	516.675	544.053	107	437.053	0.845895
467	2.872	556.497	116	440.497	308.353	107	201.353	0.457104
468	8.799	651.062	116	535.062	524.349	107	417.349	0.780001
469	3.685	668.851	116	552.851	421.748	107	314.748	0.569318
470	2.988	366.428	116	250.428	218.522	107	111.522	0.445326
471	2.806	467.101	116	351.101	253.864	107	146.864	0.418296
472	7.504	505.038	116	389.038	375.892	107	268.892	0.691172
473	5.893	608.628	116	492.628	275.346	107	168.346	0.34173
474	8.483	573.348	116	457.348	280.219	107	173.219	0.378747
475	5.263	512.792	116	396.792	241.732	107	134.732	0.339553
476	6.026	617.077	116	501.077	326.364	107	219.364	0.437785
477	3.785	402.101	116	286.101	227.364	107	120.364	0.420705
478	7.238	527.679	116	411.679	336.05	107	229.05	0.55638
479	4.283	465.174	116	349.174	449.767	107	342.767	0.981651
480	3.055	395.239	116	279.239	198.223	107	91.223	0.326684
481	5.362	530.889	116	414.889	388.012	107	281.012	0.677319
482	2.623	547.728	116	431.728	277.133	107	170.133	0.394075
483	3.719	533.728	116	417.728	471.134	107	364.134	0.871701
484	3.187	430.292	116	314.292	202.682	107	95.682	0.304437
485	2.274	511.044	116	395.044	220.547	107	113.547	0.287429
486	9.994	502.455	116	386.455	270.743	107	163.743	0.423705
487	2.241	533.267	116	417.267	224	107	117	0.280396
488	8.749	470.93	116	354.93	214.835	107	107.835	0.30382
489	3.519	519.259	116	403.259	195.693	107	88.693	0.219941
490	3.337	490.682	116	374.682	310.607	107	203.607	0.543413
491	2.64	380.352	116	264.352	193.528	107	86.528	0.327321
492	2.009	440.041	116	324.041	304.901	107	197.901	0.610728
493	2.175	374.534	116	258.534	179.351	107	72.351	0.279851
494	2.025	445.172	116	329.172	374.762	107	267.762	0.813441
495	2.025	510.467	116	394.467	331.852	107	224.852	0.570015
496	5.097	417.71	116	301.71	330.997	107	223.997	0.742425
497	2.208	448.188	116	332.188	223.308	107	116.308	0.350127
498	2.523	422.836	116	306.836	183.342	107	76.342	0.248804
499	2.108	392.913	116	276.913	228.205	107	121.205	0.437701
500	2.822	373.165	116	257.165	197.265	107	90.265	0.351
501	2.44	520.871	116	404.871	189.136	107	82.136	0.20287
502	4.599	436.404	116	320.404	228.372	107	121.372	0.378809
503	2.656	408.837	116	292.837	210.806	107	103.806	0.354484
504	2.474	406	116	290	269.523	107	162.523	0.560424
505	2.142	433.69	116	317.69	136.682	107	29.682	0.0934307
506	2.258	435.647	116	319.647	167.309	107	60.309	0.188674
507	2.44	393.272	116	277.272	130.041	107	23.041	0.0830989
508	2.357	407.141	116	291.141	146.324	107	39.324	0.135069
509	2.756	497.367	116	381.367	186.639	107	79.639	0.208825
510	2.274	467.277	116	351.277	295.555	107	188.555	0.53677
511	4.034	544.7	116	428.7	280.658	107	173.658	0.40508
512	2.191	590.386	116	474.386	230.015	107	123.015	0.259314
513	3.32	529.81	116	413.81	304.385	107	197.385	0.476994
514	2.391	443.056	116	327.056	179.771	107	72.771	0.222503
515	2.108	572.37	116	456.37	262.528	107	155.528	0.340794
516	2.938	473.395	116	357.395	328.661	107	221.661	0.620213
517	2.025	449.721	116	333.721	316.475	107	209.475	0.627695
518	3.237	553.882	116	437.882	210.482	107	103.482	0.236324
519	2.042	530.431	116	414.431	531.26	107	424.26	1.02372
520	3.685	605.32	116	489.32	239.901	107	132.901	0.271603
521	3.818	556.417	116	440.417	291.587	107	184.587	0.419119
522	2.042	516.943	116	400.943	242.707	107	135.707	0.33847
523	5.678	493.845	116	377.845	238.079	107	131.079	0.346912
524	3.885	476.868	116	360.868	210.761	107	103.761	0.287532
525	2.258	467.338	116	351.338	356.221	107	249.221	0.709348
526	2.225	530.269	116	414.269	226	107	119	0.287253
527	3.005	570.022	116	454.022	198.381	107	91.381	0.20127
528	2.938	529.073	116	413.073	369.39	107	262.39	0.635215
529	4.399	460.317	116	344.317	202.977	107	95.977	0.278746
530	2.158	600	116	484	443.285	107	336.285	0.694804
531	6.441	613.309	116	497.309	400.101	107	293.101	0.589374
532	2.523	624.461	116	508.461	365.211	107	258.211	0.507829
533	3.204	458.373	116	342.373	224.705	107	117.705	0.343792
534	2.324	600.707	116	484.707	297.65	107	190.65	0.39333
535	2.407	571.821	116	455.821	365.103	107	258.103	0.566238
536	3.071	629.335	116	513.335	357.822	107	250.822	0.488613
537	3.088	547.151	116	431.151	344.796	107	237.796	0.551538
538	9.048	739.383	116	623.383	375.532	107	268.532	0.430766
539	2.49	570.06	116	454.06	207.073	107	100.073	0.220396
540	3.602	617.714	116	501.714	264.484	107	157.484	0.313892
541	4.499	514.601	116	398.601	166.679	107	59.679	0.149721
542	4.549	693.296	116	577.296	228.927	107	121.927	0.211204
543	2.972	520.709	116	404.709	274.67	107	167.67	0.414298
544	2.673	482.789	116	366.789	228.323	107	121.323	0.330771
545	2.308	432.971	116	316.971	147.432	107	40.432	0.127557
546	6.159	688.822	116	572.822	523.617	107	416.617	0.727306
547	9.263	872.746	116	756.746	403.324	107	296.324	0.391577
548	3.602	443.124	116	327.124	233.041	107	126.041	0.3853
549	2.092	618.365	116	502.365	200.579	107	93.579	0.186277
550	10.16	612.783	116	496.783	356.495	107	249.495	0.502221
551	4.549	745.252	116	629.252	252.825	107	145.825	0.231743
552	5.263	645.148	116	529.148	342.618	107	235.618	0.445278
553	6.159	665.305	116	549.305	218.736	107	111.736	0.203413
554	3.685	563.288	116	447.288	254.131	107	147.131	0.32894
555	7.836	799.614	116	683.614	540.403	107	433.403	0.633988
556	3.486	519.876	116	403.876	168.752	107	61.752	0.152898
557	4.35	524.286	116	408.286	217.76	107	110.76	0.27128
558	2.772	616.856	116	500.856	395.293	107	288.293	0.575601
559	4.017	661.157	116	545.157	255.55	107	148.55	0.27249
560	2.059	651.565	116	535.565	399.718	107	292.718	0.546559
561	9.546	760.231	116	644.231	573.045	107	466.045	0.723413
562	2.59	640.718	116	524.718	530.167	107	423.167	0.806466
563	3.403	701.263	116	585.263	388.956	107	281.956	0.481759
564	3.984	530.112	116	414.112	372.583	107	265.583	0.641331
565	2.822	701.976	116	585.976	296.424	107	189.424	0.323262
566	3.171	665.56	116	549.56	539.387	107	432.387	0.786788
567	7.703	722.776	116	606.776	404.052	107	297.052	0.489558
568	2.175	506.42	116	390.42	179.603	107	72.603	0.185961
569	6.624	761.952	116	645.952	326.311	107	219.311	0.339516
570	6.823	821.827	116	705.827	381.815	107	274.815	0.389352
571	3.503	645.336	116	529.336	422.649	107	315.649	0.596311
572	6.109	710.508	116	594.508	416.772	107	309.772	0.521056
573	5.362	643.006	116	527.006	435.839	107	328.839	0.623976
574	4.881	722.361	116	606.361	418.286	107	311.286	0.513367
575	4.416	464.523	116	348.523	304.718	107	197.718	0.567303
576	10.044	743.545	116	627.545	573.734	107	466.734	0.743746
577	3.984	516.021	116	400.021	283.717	107	176.717	0.441769
578	7.039	767.368	116	651.368	559.748	107	452.748	0.695073
579	4.848	668.045	116	552.045	302.678	107	195.678	0.35446
580	4.416	745.774	116	629.774	540.647	107	433.647	0.688576
581	3.154	743.553	116	627.553	448.942	107	341.942	0.544881
582	3.486	720.924	116	604.924	422.276	107	315.276	0.521183
583	3.254	576.929	116	460.929	371.944	107	264.944	0.574804
584	4.482	814.096	116	698.096	460.852	107	353.852	0.506882
585	2.059	716.476	116	600.476	342.71	107	235.71	0.392539
586	2.341	720.234	116	604.234	650.667	107	543.667	0.899762
587	2.839	534.503	116	418.503	387.123	107	280.123	0.669345
588	6.176	778.116	116	662.116	596.083	107	489.083	0.738667
589	3.304	815.508	116	699.508	232.206	107	125.206	0.178992
590	9.214	872.009	116	756.009	487.793	107	380.793	0.503688
591	4.001	713.315	116	597.315	506.556	107	399.556	0.66892
592	6.889	801.933	116	685.933	476.275	107	369.275	0.538354
593	4.034	949.621	116	833.621	957.099	107	850.099	1.01977
594	3.519	414.755	116	298.755	178.358	107	71.358	0.238851
595	2.092	783.556	116	667.556	807.984	107	700.984	1.05008
596	6.275	749.082	116	633.082	506.788	107	399.788	0.631495
597	4.731	634.751	116	518.751	636.105	107	529.105	1.01996
598	4.781	692.535	116	576.535	489.406	107	382.406	0.663283
599	4.001	467.822	116	351.822	330.535	107	223.535	0.635364
600	8.201	706.85	116	590.85	496.476	107	389.476	0.659179
601	3.121	859.059	116	743.059	252.229	107	145.229	0.195447
602	6.441	745.644	116	629.644	222.598	107	115.598	0.183593
603	5.678	599.591	116	483.591	434.643	107	327.643	0.677521
604	7.222	762.485	116	646.485	528.869	107	421.869	0.652558
605	5.13	658.809	116	542.809	568.605	107	461.605	0.8504
606	2.855	697.448	116	581.448	476.971	107	369.971	0.636292
607	10.276	753.305	116	637.305	488.708	107	381.708	0.598941
608	5.727	615.867	116	499.867	267.261	107	160.261	0.320607
609	2.407	724.959	116	608.959	473.324	107	366.324	0.601558
610	18.909	827.053	116	711.053	425.541	107	318.541	0.447985
611	3.669	467.914	116	351.914	286.95	107	179.95	0.511347
612	2.092	735.151	116	619.151	269.222	107	162.222	0.262007
613	2.706	698.712	116	582.712	288.074	107	181.074	0.310744
614	4.599	706.076	116	590.076	541.061	107	434.061	0.735602
615	3.32	837.35	116	721.35	433.73	107	326.73	0.452942
616	2.689	644.457	116	528.457	515.963	107	408.963	0.773881
617	6.192	675.767	116	559.767	474.424	107	367.424	0.656387
618	2.308	505.669	116	389.669	224.36	107	117.36	0.301179
619	2.025	513.197	116	397.197	284.574	107	177.574	0.447068
620	5.047	800.24	116	684.24	709.411	107	602.411	0.880409
621	2.889	522.851	116	406.851	209.523	107	102.523	0.251992
622	5.13	685.864	116	569.864	373.796	107	266.796	0.468175
623	2.689	756.907	116	640.907	468.012	107	361.012	0.563283
624	3.652	801.905	116	685.905	545.2	107	438.2	0.638864
625	2.108	639.606	116	523.606	861.866	107	754.866	1.44167
626	7.886	789.015	116	673.015	662.783	107	555.783	0.825811
627	2.706	703.117	116	587.117	1151.12	107	1044.12	1.77838
628	5.777	753.284	116	637.284	613.56	107	506.56	0.794873
629	3.885	776.543	116	660.543	584.893	107	477.893	0.723485
630	4.682	762.957	116	646.957	576.255	107	469.255	0.725326
631	9.712	771.672	116	655.672	691.819	107	584.819	0.891938
632	2.938	430.203	116	314.203	324.356	107	217.356	0.691769
633	5.08	714.771	116	598.771	417.598	107	310.598	0.518726
634	3.636	783.306	116	667.306	948.301	107	841.301	1.26074
635	2.673	610.857	116	494.857	306.789	107	199.789	0.403731
636	3.154	820.089	116	704.089	431.342	107	324.342	0.460655
637	2.889	612.132	116	496.132	768.454	107	661.454	1.33322
638	2.108	423.15	116	307.15	253.094	107	146.094	0.475644
639	2.656	753.288	116	637.288	306.356	107	199.356	0.312819
640	2.606	651.561	116	535.561	766.93	107	659.93	1.23222
641	4.881	786.313	116	670.313	290.388	107	183.388	0.273586
642	5.08	706.464	116	590.464	405.928	107	298.928	0.506259
643	3.038	769.874	116	653.874	720.202	107	613.202	0.937798
644	3.138	726.413	116	610.413	754.201	107	647.201	1.06027
645	3.934	616.561	116	500.561	227.527	107	120.527	0.240784
646	2.341	708.333	116	592.333	406.773	107	299.773	0.506089
647	2.208	825.331	116	709.331	602.91	107	495.91	0.699124
648	10.177	846.654	116	730.654	794.064	107	687.064	0.940341
649	3.752	791.889	116	675.889	515.053	107	408.053	0.603728
650	5.678	651.971	116	535.971	583.763	107	476.763	0.889531
651	7.686	828.231	116	712.231	922.994	107	815.994	1.14569
652	3.088	703.091	116	587.091	725.968	107	618.968	1.0543
653	6.043	613.173	116	497.173	386.591	107	279.591	0.562362
654	7.919	755.82	116	639.82	634.182	107	527.182	0.823954
655	4.366	816.027	116	700.027	947.049	107	840.049	1.20002
656	6.043	563.319	116	447.319	325.255	107	218.255	0.487918
657	6.939	646.304	116	530.304	373.665	107	266.665	0.502853
658	3.104	701.882	116	585.882	973.706	107	866.706	1.47932
659	6.159	769.728	116	653.728	908.868	107	801.868	1.22661
660	9.297	759.305	116	643.305	591.33	107	484.33	0.752878
661	2.341	705.674	116	589.674	408.426	107	301.426	0.511174
662	5.727	814.148	116	698.148	642.313	107	535.313	0.766761
663	3.503	783.479	116	667.479	360.976	107	253.976	0.3805
664	2.789	668.179	116	552.179	871.018	107	764.018	1.38364
665	8.998	770.882	116	654.882	608.511	107	501.511	0.765804
666	3.038	407.732	116	291.732	193.716	107	86.716	0.297245
667	3.337	538.224	116	422.224	328.09	107	221.09	0.523632
668	2.822	700.235	116	584.235	483.512	107	376.512	0.644453
669	4.084	725.248	116	609.248	552.634	107	445.634	0.731449
670	3.553	693.612	116	577.612	270.897	107	163.897	0.283749
671	5.113	670.182	116	554.182	584.653	107	477.653	0.861906
672	2.324	657.979	116	541.979	219.179	107	112.179	0.20698
673	4.648	757.111	116	641.111	586.407	107	479.407	0.747775
674	3.818	735.839	116	619.839	521.861	107	414.861	0.669304
675	2.689	604.407	116	488.407	709.593	107	602.593	1.23379
676	2.025	651.238	116	535.238	308.59	107	201.59	0.376636
677	4.001	715.29	116	599.29	329.008	107	222.008	0.370452
678	4.266	518.58	116	402.58	313.498	107	206.498	0.512937
679	4.632	745.154	116	629.154	182.151	107	75.151	0.119448
680	5.346	739.071	116	623.071	344.106	107	237.106	0.380544
681	7.587	723.904	116	607.904	478.602	107	371.602	0.611284
682	3.436	700.246	116	584.246	481.527	107	374.527	0.641043
683	5.877	710.401	116	594.401	350.155	107	243.155	0.409076
684	5.844	655.514	116	539.514	502.298	107	395.298	0.732693
685	2.706	387.779	116	271.779	265.442	107	158.442	0.582981
686	5.312	787.7	116	671.7	347.422	107	240.422	0.357931
687	6.292	725.459	116	609.459	435.09	107	328.09	0.53833
688	3.154	588.063	116	472.063	229.932	107	122.932	0.260414
689	4.549	521.292	116	405.292	246.182	107	139.182	0.343412
690	6.773	536.333	116	420.333	260.115	107	153.115	0.364271
691	6.441	647.755	116	531.755	374.17	107	267.17	0.502431
692	2.623	432.968	116	316.968	211.823	107	104.823	0.330705
693	4.449	654.657	116	538.657	473.276	107	366.276	0.67998
694	4.283	540.101	116	424.101	246.531	107	139.531	0.329004
695	2.49	665.667	116	549.667	264.467	107	157.467	0.286477
696	6.557	747.096	116	631.096	594.218	107	487.218	0.772019
697	3.237	603.026	116	487.026	417.759	107	310.759	0.638075
698	2.673	360.764	116	244.764	200.789	107	93.789	0.383181
699	3.353	642.936	116	526.936	625.262	107	518.262	0.983539
700	9.38	676.322	116	560.322	323.943	107	216.943	0.387176
701	3.785	456.039	116	340.039	152.035	107	45.035	0.132441
702	2.158	548.923	116	432.923	367.9	107	260.9	0.602648
703	5.362	699.214	116	583.214	695.037	107	588.037	1.00827
704	3.47	583.837	116	467.837	191.77	107	84.77	0.181196
705	2.988	654.722	116	538.722	419.983	107	312.983	0.580973
706	3.586	545.991	116	429.991	338.972	107	231.972	0.539481
707	2.457	378.622	116	262.622	179.851	107	72.851	0.277399
708	3.37	454.246	116	338.246	424.517	107	317.517	0.938716
709	2.507	580.901	116	464.901	427.404	107	320.404	0.689188
710	2.025	617.279	116	501.279	504.525	107	397.525	0.793021
711	4.565	561.156	116	445.156	326.356	107	219.356	0.492762
712	2.125	578.055	116	462.055	358.836	107	251.836	0.545035
713	11.405	612.496	116	496.496	495.591	107	388.591	0.782667
714	8.4	666.338	116	550.338	284.534	107	177.534	0.322591
715	2.573	435.355	116	319.355	161.942	107	54.942	0.172041
716	2.872	399.491	116	283.491	191.578	107	84.578	0.298345
717	9.313	528.975	116	412.975	290.513	107	183.513	0.444368
718	3.104	680.005	116	564.005	584.487	107	477.487	0.846601
719	2.324	553.086	116	437.086	703.893	107	596.893	1.36562
720	4.499	617.465	116	501.465	518.229	107	411.229	0.820055
721	6.391	498.914	116	382.914	230.281	107	123.281	0.321955
722	7.487	610.634	116	494.634	430.685	107	323.685	0.654393
723	3.138	491.593	116	375.593	225.672	107	118.672	0.315959
724	4.217	571.937	116	455.937	227.295	107	120.295	0.263841
725	3.055	583.788	116	467.788	242.087	107	135.087	0.288778
726	4.15	561.932	116	445.932	352.256	107	245.256	0.549985
727	6.873	586.246	116	470.246	351.309	107	244.309	0.519534
728	7.321	473.764	116	357.764	305.317	107	198.317	0.554324
729	2.308	501.698	116	385.698	304.755	107	197.755	0.51272
730	2.424	505.37	116	389.37	281.973	107	174.973	0.449375
731	4.599	496.162	116	380.162	237.697	107	130.697	0.343793
732	2.059	513.839	116	397.839	377.242	107	270.242	0.679275
733	2.606	522.248	116	406.248	294.841	107	187.841	0.46238
734	2.407	525.669	116	409.669	334.924	107	227.924	0.556361
735	2.507	406.675	116	290.675	198.854	107	91.854	0.316002
736	2.938	535.362	116	419.362	248.605	107	141.605	0.337668
737	5.611	539.435	116	423.435	296.923	107	189.923	0.448529
738	7.803	536.879	116	420.879	271.279	107	164.279	0.390324
739	2.756	400.518	116	284.518	230.831	107	123.831	0.435231
740	2.025	502.943	116	386.943	253.008	107	146.008	0.377337
741	3.353	465.569	116	349.569	301.406	107	194.406	0.556131
742	2.573	454.529	116	338.529	233.406	107	126.406	0.373398
743	4.217	527.213	116	411.213	355.122	107	248.122	0.60339
744	2.108	540.969	116	424.969	318.173	107	211.173	0.496914
745	2.789	587.875	116	471.875	316.827	107	209.827	0.444666
746	2.557	440.974	116	324.974	368.286	107	261.286	0.804021
747	13.995	460.855	116	344.855	290.67	107	183.67	0.532601
748	2.241	458.874	116	342.874	403.911	107	296.911	0.865948
749	3.536	375.873	116	259.873	208.465	107	101.465	0.390441
750	4.549	454.569	116	338.569	190.245	107	83.245	0.245873
751	2.042	533.472	116	417.472	314.585	107	207.585	0.497243
752	2.656	434.725	116	318.725	299.144	107	192.144	0.602852
753	3.138	469.46	116	353.46	289.164	107	182.164	0.515374
754	2.208	466.594	116	350.594	176.008	107	69.008	0.196832
755	3.835	406.571	116	290.571	204.472	107	97.472	0.33545
756	3.553	450.621	116	334.621	236.224	107	129.224	0.38618
757	4.084	419.13	116	303.13	207.431	107	100.431	0.331313
758	4.167	539.765	116	423.765	285.147	107	178.147	0.420391
759	3.768	502.489	116	386.489	291.837	107	184.837	0.478246
760	2.44	407.619	116	291.619	159.333	107	52.333	0.179457
761	2.374	398.14	116	282.14	188.923	107	81.923	0.290363
762	4.117	565.423	116	449.423	321.944	107	214.944	0.478267
763	2.142	495.612	116	379.612	245.977	107	138.977	0.366103
764	3.602	470.687	116	354.687	217.369	107	110.369	0.311173
765	2.972	479.246	116	363.246	208.246	107	101.246	0.278726
766	2.241	453.689	116	337.689	229.667	107	122.667	0.363254
767	4.183	445.552	116	329.552	141.857	107	34.857	0.105771
768	5.628	499.351	116	383.351	231.298	107	124.298	0.324241
769	2.175	452.389	116	336.389	296.74	107	189.74	0.564049
770	4.416	585.481	116	469.481	235.688	107	128.688	0.274107
771	2.889	433.385	116	317.385	189.414	107	82.414	0.259666
772	2.623	488.519	116	372.519	229.949	107	122.949	0.330048
773	2.756	524.994	116	408.994	263.53	107	156.53	0.38272
774	3.719	571.942	116	455.942	370.312	107	263.312	0.577512
775	3.901	495.14	116	379.14	306.817	107	199.817	0.527027
776	5.578	566.714	116	450.714	242.881	107	135.881	0.301479
777	2.573	585.071	116	469.071	376.135	107	269.135	0.573762
778	2.474	504.899	116	388.899	276.617	107	169.617	0.436147
779	4.549	587.234	116	471.234	491.595	107	384.595	0.816144
780	3.038	587.557	116	471.557	304.295	107	197.295	0.418391
781	2.756	426.41	116	310.41	294.139	107	187.139	0.602877
782	2.241	458.207	116	342.207	230.844	107	123.844	0.361898
783	4.98	616.393	116	500.393	258.107	107	151.107	0.301977
784	2.955	428.77	116	312.77	185.073	107	78.073	0.249618
785	2.756	652.428	116	536.428	376.036	107	269.036	0.501532
786	3.154	589.921	116	473.921	305.574	107	198.574	0.419002
787	2.59	575.282	116	459.282	290.667	107	183.667	0.3999
788	3.984	559.688	116	443.688	201.033	107	94.033	0.211935
789	2.706	438.38	116	322.38	199.558	107	92.558	0.287108
790	3.337	649.055	116	533.055	225.443	107	118.443	0.222197
791	2.59	574.596	116	458.596	287.372	107	180.372	0.393314
792	2.241	466.178	116	350.178	219.504	107	112.504	0.321277
793	2.075	578.328	116	462.328	324.192	107	217.192	0.469779
794	3.669	615.597	116	499.597	378.566	107	271.566	0.54357
795	4.931	685.976	116	569.976	348.505	107	241.505	0.423711
796	2.623	621.747	116	505.747	437.038	107	330.038	0.652575
797	5.595	642.347	116	526.347	369.338	107	262.338	0.498413
798	2.507	624.47	116	508.47	347.623	107	240.623	0.473229
799	7.487	715.714	116	599.714	499.446	107	392.446	0.654389
800	3.685	568.577	116	452.577	284.653	107	177.653	0.392537
801	3.154	629.853	116	513.853	458.689	107	351.689	0.684416
802	2.208	594.812	116	478.812	317.496	107	210.496	0.439621
803	16.701	707.973	116	591.973	368.725	107	261.725	0.442123
804	2.855	634.465	116	518.465	454.297	107	347.297	0.669856
805	15.838	546.28	116	430.28	268.991	107	161.991	0.376478
806	2.806	594.024	116	478.024	250.101	107	143.101	0.299359
807	7.886	807.68	116	691.68	339.545	107	232.545	0.336203
808	3.602	667.046	116	551.046	236.608	107	129.608	0.235204
809	7.371	698.912	116	582.912	432.387	107	325.387	0.558209
810	2.49	492.78	116	376.78	327.233	107	220.233	0.584514
811	2.374	474.294	116	358.294	188.469	107	81.469	0.22738
812	2.889	777.54	116	661.54	395.552	107	288.552	0.436182
813	3.287	625.394	116	509.394	304.465	107	197.465	0.387647
814	6.242	711.178	116	595.178	304.066	107	197.066	0.331104
815	4.034	453.457	116	337.457	189.753	107	82.753	0.245225
816	3.27	590.736	116	474.736	304.503	107	197.503	0.416027
817	5.03	466.34	116	350.34	256.851	107	149.851	0.42773
818	6.508	662.11	116	546.11	303.168	107	196.168	0.35921
819	2.291	758.022	116	642.022	200.464	107	93.464	0.145578
820	8.55	842.88	116	726.88	458.938	107	351.938	0.484176
821	6.292	708.193	116	592.193	314.831	107	207.831	0.350951
822	4.383	503.936	116	387.936	171.098	107	64.098	0.165228
823	2.009	523.05	116	407.05	317.785	107	210.785	0.517836
824	2.274	682.788	116	566.788	330.737	107	223.737	0.394745
825	2.49	630.393	116	514.393	221.547	107	114.547	0.222684
826	5.196	717.537	116	601.537	307.46	107	200.46	0.333246
827	4.167	813.04	116	697.04	765.088	107	658.088	0.944118
828	5.113	672.412	116	556.412	523.685	107	416.685	0.748879
829	4.897	681.064	116	565.064	302.919	107	195.919	0.34672
830	2.059	407.492	116	291.492	199.758	107	92.758	0.318218
831	9.33	569.56	116	453.56	317.468	107	210.468	0.464036
832	2.64	817.881	116	701.881	1202.97	107	1095.97	1.56147
833	2.042	745.642	116	629.642	533.691	107	426.691	0.677672
834	8.566	708.475	116	592.475	354.029	107	247.029	0.416944
835	3.685	773.473	116	657.473	427.18	107	320.18	0.486986
836	2.972	725.464	116	609.464	891.24	107	784.24	1.28677
837	2.274	668.613	116	552.613	663.599	107	556.599	1.00721
838	2.474	749.98	116	633.98	357.161	107	250.161	0.394588
839	5.512	683.852	116	567.852	482.5	107	375.5	0.661264
840	6.723	881.773	116	765.773	590.336	107	483.336	0.631174
841	3.353	807.832	116	691.832	455.307	107	348.307	0.503456
842	3.204	562.228	116	446.228	516.876	107	409.876	0.918535
843	8.815	717.985	116	601.985	719.964	107	612.964	1.01824
844	3.038	788.071	116	672.071	330.24	107	223.24	0.332167
845	2.142	778.147	116	662.147	315.078	107	208.078	0.314247
846	9.429	695.766	116	579.766	424.632	107	317.632	0.547862
847	3.403	751.18	116	635.18	458.898	107	351.898	0.554013
848	3.669	523.878	116	407.878	466.348	107	359.348	0.881018
849	2.905	764.714	116	648.714	693.794	107	586.794	0.90455
850	2.54	557.974	116	441.974	361.124	107	254.124	0.574975
851	4.383	836.708	116	720.708	750.951	107	643.951	0.893498
852	5.395	655.218	116	539.218	520.48	107	413.48	0.766814
853	2.108	837.764	116	721.764	519.142	107	412.142	0.57102
854	3.885	613.94	116	497.94	358.705	107	251.705	0.505493
855	2.606	711.548	116	595.548	476.401	107	369.401	0.620271
856	6.956	860.632	116	744.632	454.325	107	347.325	0.466438
857	3.038	592.514	116	476.514	717.984	107	610.984	1.2822
858	4.2	767.759	116	651.759	522.221	107	415.221	0.637078
859	5.96	659.019	116	543.019	293.819	107	186.819	0.344038
860	5.113	750.834	116	634.834	712.724	107	605.724	0.954145
861	4.034	647.749	116	531.749	257.877	107	150.877	0.283737
862	2.374	467.434	116	351.434	257.14	107	150.14	0.427221
863	3.602	922.009	116	806.009	239.111	107	132.111	0.163908
864	2.042	596.48	116	480.48	212.61	107	105.61	0.219801
865	7.188	674.577	116	558.577	359.864	107	252.864	0.452693
866	3.42	796.16	116	680.16	250.723	107	143.723	0.211308
867	2.623	594.703	116	478.703	253.266	107	146.266	0.305546
868	4.383	750.083	116	634.083	514.693	107	407.693	0.642965
869	3.885	432.167	116	316.167	206.282	107	99.282	0.314018
870	4.266	949.292	116	833.292	265.79	107	158.79	0.190557
871	4.748	736.608	116	620.608	315.336	107	208.336	0.335697
872	3.785	568.026	116	452.026	254.956	107	147.956	0.327317
873	14.675	649.929	116	533.929	336.779	107	229.779	0.430355
874	5.014	773.566	116	657.566	482.762	107	375.762	0.571444
875	4.931	728.929	116	612.929	614.108	107	507.108	0.827352
876	2.457	423.027	116	307.027	268.568	107	161.568	0.526234
877	2.806	770.438	116	654.438	490.751	107	383.751	0.586383
878	2.042	460.366	116	344.366	152.902	107	45.902	0.133294
879	8.118	687.153	116	571.153	234.755	107	127.755	0.223679
880	5.877	897.782	116	781.782	548.076	107	441.076	0.564193
881	2.457	775.122	116	659.122	453.601	107	346.601	0.525853
882	2.872	702.035	116	586.035	786.728	107	679.728	1.15988
883	3.735	698.213	116	582.213	410.156	107	303.156	0.520696
884	5.91	699.152	116	583.152	386.298	107	279.298	0.478945
885	6.225	803.563	116	687.563	531.704	107	424.704	0.617695
886	2.872	550.069	116	434.069	251.121	107	144.121	0.332023
887	6.142	733.186	116	617.186	471.032	107	364.032	0.589825
888	2.507	775.669	116	659.669	492.868	107	385.868	0.584942
889	9.114	827.375	116	711.375	549.831	107	442.831	0.6225
890	2.872	756.428	116	640.428	261.329	107	154.329	0.240978
891	6.69	846.568	116	730.568	510.586	107	403.586	0.552428
892	2.059	513.21	116	397.21	338.153	107	231.153	0.581942
893	4.333	730.069	116	614.069	203.885	107	96.885	0.157775
894	3.453	519.745	116	403.745	268.625	107	161.625	0.400315
895	7.487	737.898	116	621.898	484.004	107	377.004	0.606215
896	4.682	935.784	116	819.784	303.766	107	196.766	0.240022
897	12.152	833.794	116	717.794	616.594	107	509.594	0.709945
898	4.15	518.88	116	402.88	273.632	107	166.632	0.413602
899	3.553	615.991	116	499.991	270.542	107	163.542	0.32709
900	2.922	615.551	116	499.551	258.54	107	151.54	0.303352
901	8.832	772.498	116	656.498	535.605	107	428.605	0.652866
902	3.37	803.025	116	687.025	906.355	107	799.355	1.1635
903	4.648	862.343	116	746.343	389.311	107	282.311	0.378259
904	3.768	629.758	116	513.758	352.89	107	245.89	0.478611
905	4.283	535.833	116	419.833	384.919	107	277.919	0.661975
906	2.789	631.202	116	515.202	339.077	107	232.077	0.450458
907	7.072	930.674	116	814.674	716.85	107	609.85	0.748582
908	5.595	591.973	116	475.973	528.018	107	421.018	0.884542
909	2.225	845.575	116	729.575	449.194	107	342.194	0.469032
910	5.91	788.601	116	672.601	389.612	107	282.612	0.420178
911	2.208	560.211	116	444.211	254.113	107	147.113	0.331178
912	2.391	734.014	116	618.014	261.597	107	154.597	0.250151
913	2.324	846.307	116	730.307	950.457	107	843.457	1.15493
914	3.436	574.942	116	458.942	231.749	107	124.749	0.271819
915	2.241	530.526	116	414.526	169.081	107	62.081	0.149764
916	3.453	703.106	116	587.106	479.077	107	372.077	0.633748
917	4.067	503.935	116	387.935	171.939	107	64.939	0.167397
918	4.715	693.898	116	577.898	290.581	107	183.581	0.31767
919	4.466	608.669	116	492.669	296.379	107	189.379	0.384394
920	3.121	547.42	116	431.42	273.149	107	166.149	0.385121
921	7.653	719.681	116	603.681	619.479	107	512.479	0.848924
922	2.357	596.901	116	480.901	232.113	107	125.113	0.260164
923	3.121	603.814	116	487.814	475.787	107	368.787	0.755999
924	7.487	647.348	116	531.348	470.57	107	363.57	0.684241
925	3.968	571.088	116	455.088	487.339	107	380.339	0.835748
926	6.773	547.877	116	431.877	392.907	107	285.907	0.66201
927	3.519	717.608	116	601.608	595.057	107	488.057	0.811254
928	2.44	652.857	116	536.857	251.231	107	144.231	0.268658
929	6.375	512.464	116	396.464	426.214	107	319.214	0.805153
930	4.698	637.509	116	521.509	453.11	107	346.11	0.66367
931	2.457	799.953	116	683.953	262.574	107	155.574	0.227463
932	2.025	512.254	116	396.254	160.934	107	53.934	0.13611
933	3.669	557.873	116	441.873	264.557	107	157.557	0.356566
934	2.357	667.035	116	551.035	258.092	107	151.092	0.274197
935	2.706	700.19	116	584.19	478.08	107	371.08	0.635204
936	5.213	707.771	116	591.771	503.191	107	396.191	0.669501
937	4.682	711.599	116	595.599	759.472	107	652.472	1.09549
938	6.142	713.178	116	597.178	423.305	107	316.305	0.529666
939	2.258	588.971	116	472.971	545.596	107	438.596	0.927321
940	2.341	744.397	116	628.397	540.539	107	433.539	0.689913
941	3.121	468.043	116	352.043	200.34	107	93.34	0.265138
942	2.739	728.418	116	612.418	434.545	107	327.545	0.534839
943	3.387	528.279	116	412.279	192.51	107	85.51	0.207408
944	4.266	767.813	116	651.813	584.428	107	477.428	0.732462
945	2.158	458.562	116	342.562	308.015	107	201.015	0.586799
946	7.006	750.59	116	634.59	551.749	107	444.749	0.700845
947	2.706	766.313	116	650.313	498.074	107	391.074	0.601363
948	2.938	634.78	116	518.78	324.452	107	217.452	0.41916
949	6.325	534.423	116	418.423	329.417	107	222.417	0.53156
950	4.2	418.996	116	302.996	191.289	107	84.289	0.278185
951	3.436	398.237	116	282.237	177.7	107	70.7	0.250499
952	2.905	624.366	116	508.366	424.851	107	317.851	0.62524
953	4.017	764.244	116	648.244	825.054	107	718.054	1.10769
954	5.395	676.757	116	560.757	728.674	107	621.674	1.10863
955	3.104	713	116	597	1000.06	107	893.059	1.49591
956	4.765	668.084	116	552.084	372.753	107	265.753	0.481363
957	4.897	644.807	116	528.807	343.481	107	236.481	0.447197
958	8.981	652.438	116	536.438	513.555	107	406.555	0.757879
959	2.623	376.234	116	260.234	156.139	107	49.139	0.188826
960	2.772	680.647	116	564.647	557.587	107	450.587	0.797998
961	2.474	649.785	116	533.785	594.966	107	487.966	0.914162
962	2.772	569.994	116	453.994	449.234	107	342.234	0.753829
963	2.324	569.871	116	453.871	296.6	107	189.6	0.41774
964	2.938	659.362	116	543.362	542.802	107	435.802	0.802047
965	3.719	616.522	116	500.522	514.429	107	407.429	0.814008
966	2.839	624.784	116	508.784	532.24	107	425.24	0.835797
967	2.474	485.624	116	369.624	205.886	107	98.886	0.267531
968	6.74	657.633	116	541.633	453.633	107	346.633	0.639978
969	4.615	651.964	116	535.964	456.939	107	349.939	0.652915
970	7.869	646.652	116	530.652	339.051	107	232.051	0.437294
971	2.706	424.675	116	308.675	238.687	107	131.687	0.42662
972	4.15	604.092	116	488.092	355.288	107	248.288	0.508691
973	3.237	570.405	116	454.405	227.533	107	120.533	0.265255
974	6.093	515.624	116	399.624	261.221	107	154.221	0.385915
975	3.154	640.2	116	524.2	311.647	107	204.647	0.390399
976	2.789	618.31	116	502.31	269.423	107	162.423	0.323352
977	4.599	686.581	116	570.581	342.105	107	235.105	0.412045
978	11.92	607.029	116	491.029	326.39	107	219.39	0.446796
979	3.785	388.518	116	272.518	186.579	107	79.579	0.292014
980	2.092	586.921	116	470.921	544.706	107	437.706	0.929468
981	6.076	568.522	116	452.522	279.137	107	172.137	0.380395
982	5.03	642.208	116	526.208	414.36	107	307.36	0.584104
983	5.927	505.196	116	389.196	259.818	107	152.818	0.39265
984	2.059	511.411	116	395.411	207.476	107	100.476	0.254105
985	5.412	576.472	116	460.472	233.236	107	126.236	0.274145
986	4.233	576.722	116	460.722	475.208	107	368.208	0.799198
987	4.781	530.486	116	414.486	437.382	107	330.382	0.797088
988	4.748	555.133	116	439.133	263.85	107	156.85	0.357181
989	10.924	543.295	116	427.295	299.597	107	192.597	0.450735
990	2.59	389.128	116	273.128	259.404	107	152.404	0.557995
991	3.021	576.868	116	460.868	483.863	107	376.863	0.817724
992	4.366	588.943	116	472.943	374.631	107	267.631	0.565884
993	3.37	549.153	116	433.153	217.212	107	110.212	0.254441
994	3.254	498.709	116	382.709	258.622	107	151.622	0.396181
995	4.549	609.091	116	493.091	446.5	107	339.5	0.688514
996	2.972	619.089	116	503.089	368.095	107	261.095	0.518984
997	9.413	558.266	116	442.266	315.131	107	208.131	0.470601
998	4.565	568.775	116	452.775	281.673	107	174.673	0.385783
999	2.158	483.146	116	367.146	419.169	107	312.169	0.850258
1000	4.599	482.953	116	366.953	274.711	107	167.711	0.457037
1001	2.308	451.683	116	335.683	262.878	107	155.878	0.464361
1002	3.984	560.525	116	444.525	211.1	107	104.1	0.234183
1003	14.244	499.309	116	383.309	269.353	107	162.353	0.423556
1004	2.988	402	116	286	152.461	107	45.461	0.158955
1005	6.259	462.011	116	346.011	319.308	107	212.308	0.613587
1006	2.075	417.616	116	301.616	206.344	107	99.344	0.329372
1007	2.225	406.522	116	290.522	240.664	107	133.664	0.460082
1008	6.989	446.653	116	330.653	208.026	107	101.026	0.305535
1009	4.964	531.779	116	415.779	325.712	107	218.712	0.526029
1010	2.64	414.805	116	298.805	289	107	182	0.609093
1011	3.901	559.051	116	443.051	216.391	107	109.391	0.246904
1012	2.142	432.643	116	316.643	185.116	107	78.116	0.246701
1013	4.914	380.98	116	264.98	156.47	107	49.47	0.186693
1014	2.772	407.731	116	291.731	228.874	107	121.874	0.417762
1015	2.391	448.493	116	332.493	197.917	107	90.917	0.27344
1016	2.042	394.211	116	278.211	160.252	107	53.252	0.191409
1017	4.881	518.116	116	402.116	289.939	107	182.939	0.454941
1018	2.059	384.097	116	268.097	182.363	107	75.363	0.281103
1019	2.64	474.723	116	358.723	222.409	107	115.409	0.321722
1020	4.051	464.783	116	348.783	277.254	107	170.254	0.488137
1021	2.241	388.363	116	272.363	172.422	107	65.422	0.240201
1022	4.25	539.07	116	423.07	175.547	107	68.547	0.162023
1023	4.15	457.404	116	341.404	228.42	107	121.42	0.355649
1024	2.191	451.523	116	335.523	208.341	107	101.341	0.302039
1025	3.486	410	116	294	142.919	107	35.919	0.122173
1026	5.993	482.994	116	366.994	175.72	107	68.72	0.187251
1027	3.669	548.606	116	432.606	272.507	107	165.507	0.382581
1028	2.208	608.865	116	492.865	307.602	107	200.602	0.407012
1029	4.383	491.341	116	375.341	235.303	107	128.303	0.34183
1030	3.851	568.134	116	452.134	212.888	107	105.888	0.234196
1031	2.059	487.04	116	371.04	171.306	107	64.306	0.173313
1032	4.217	528.571	116	412.571	341.189	107	234.189	0.567633
1033	2.341	505.73	116	389.73	198.752	107	91.752	0.235425
1034	3.038	553.88	116	437.88	217.787	107	110.787	0.253008
1035	2.108	469.008	116	353.008	327.071	107	220.071	0.623416
1036	2.457	656.736	116	540.736	187.662	107	80.662	0.149171
1037	2.822	573.441	116	457.441	191.359	107	84.359	0.184415
1038	2.075	492.184	116	376.184	222.36	107	115.36	0.306658
1039	5.794	564.487	116	448.487	240.384	107	133.384	0.297409
1040	4.35	420.664	116	304.664	204.954	107	97.954	0.321515
1041	2.507	446.318	116	330.318	192.305	107	85.305	0.258251
1042	2.258	597.022	116	481.022	297.441	107	190.441	0.395909
1043	2.308	451.964	116	335.964	171.518	107	64.518	0.192038
1044	4.183	524.885	116	408.885	166.115	107	59.115	0.144576
1045	3.021	581.577	116	465.577	224.418	107	117.418	0.252199
1046	3.021	446.412	116	330.412	165.126	107	58.126	0.17592
1047	3.071	491.73	116	375.73	270.703	107	163.703	0.435693
1048	2.474	428.034	116	312.034	171.403	107	64.403	0.206397
1049	2.889	599.46	116	483.46	254.925	107	147.925	0.305972
1050	8.384	627.325	116	511.325	376.735	107	269.735	0.527522
1051	3.835	645.407	116	529.407	265.281	107	158.281	0.298978
1052	6.425	646.07	116	530.07	321.677	107	214.677	0.404997
1053	3.42	627.388	116	511.388	270.039	107	163.039	0.318817
1054	2.839	580.415	116	464.415	273.889	107	166.889	0.359353
1055	4.266	462.611	116	346.611	159.658	107	52.658	0.151922
1056	4.001	583.249	116	467.249	166.909	107	59.909	0.128216
1057	2.839	635.035	116	519.035	266.813	107	159.813	0.307904
1058	2.606	510.637	116	394.637	310.866	107	203.866	0.516591
1059	2.042	446.585	116	330.585	192.691	107	85.691	0.25921
1060	6.026	587.904	116	471.904	307.24	107	200.24	0.424324
1061	2.025	511.582	116	395.582	234.566	107	127.566	0.322477
1062	10.226	608.922	116	492.922	277.841	107	170.841	0.346588
1063	11.986	732.414	116	616.414	382.273	107	275.273	0.446572
1064	3.387	636.02	116	520.02	216.294	107	109.294	0.210173
1065	2.308	647.604	116	531.604	354.511	107	247.511	0.465593
1066	5.661	634.801	116	518.801	337.246	107	230.246	0.443804
1067	3.088	645.102	116	529.102	342.93	107	235.93	0.445906
1068	2.64	487.572	116	371.572	247.981	107	140.981	0.379418
1069	9.612	677.883	116	561.883	392.233	107	285.233	0.507638
1070	2.44	639.449	116	523.449	437.354	107	330.354	0.63111
1071	2.075	449.104	116	333.104	206.672	107	99.672	0.299222
1072	2.274	659.818	116	543.818	316.73	107	209.73	0.385662
1073	2.49	590.207	116	474.207	391.9	107	284.9	0.600792
1074	4.98	633.633	116	517.633	329.69	107	222.69	0.430208
1075	4.897	534.475	116	418.475	236.231	107	129.231	0.308814
1076	2.075	630.48	116	514.48	394.776	107	287.776	0.559353
1077	8.035	644.159	116	528.159	320.229	107	213.229	0.403721
1078	2.59	457.032	116	341.032	188.256	107	81.256	0.238265
1079	7.271	718.404	116	602.404	428.349	107	321.349	0.533444
1080	4.715	684.549	116	568.549	400.292	107	293.292	0.515861
1081	3.237	582.779	116	466.779	230.405	107	123.405	0.264376
1082	5.229	662.444	116	546.444	309.746	107	202.746	0.371028
1083	3.27	404.919	116	288.919	168.99	107	61.99	0.214558
1084	3.835	882.606	116	766.606	788.216	107	681.216	0.888613
1085	5.478	643.303	116	527.303	333.467	107	226.467	0.429482
1086	3.254	589.643	116	473.643	231.107	107	124.107	0.262026
1087	4.582	695.047	116	579.047	270.471	107	163.471	0.28231
1088	5.777	594.647	116	478.647	251.345	107	144.345	0.301569
1089	5.18	667.663	116	551.663	522.795	107	415.795	0.753712
1090	3.021	698.027	116	582.027	467.016	107	360.016	0.618555
1091	2.49	434.587	116	318.587	184.587	107	77.587	0.243535
1092	3.221	578.299	116	462.299	388.165	107	281.165	0.608189
1093	6.425	688.685	116	572.685	439.282	107	332.282	0.580218
1094	3.021	477.165	116	361.165	211.478	107	104.478	0.289281
1095	2.656	560.65	116	444.65	207.806	107	100.806	0.226709
1096	13.845	793.966	116	677.966	477.583	107	370.583	0.54661
1097	3.204	513.021	116	397.021	186.249	107	79.249	0.199609
1098	2.291	398.145	116	282.145	188.123	107	81.123	0.287522
1099	5.312	671.953	116	555.953	251.978	107	144.978	0.260774
1100	2.042	528.569	116	412.569	551.837	107	444.837	1.07821
1101	5.678	615.731	116	499.731	312.936	107	205.936	0.412094
1102	2.988	757.5	116	641.5	455.294	107	348.294	0.542937
1103	3.088	680.043	116	564.043	268.344	107	161.344	0.286049
1104	3.802	772.004	116	656.004	239.502	107	132.502	0.201984
1105	4.067	763.041	116	647.041	727.869	107	620.869	0.959551
1106	3.071	635.346	116	519.346	343.508	107	236.508	0.455396
1107	6.956	818.914	116	702.914	464.959	107	357.959	0.50925
1108	6.342	767.618	116	651.618	645.997	107	538.997	0.827167
1109	2.739	801.121	116	685.121	387.576	107	280.576	0.409528
1110	6.773	772.025	116	656.025	728.113	107	621.113	0.946783
1111	2.407	701.793	116	585.793	570.517	107	463.517	0.791264
1112	3.287	743.066	116	627.066	558.722	107	451.722	0.720374
1113	9.031	802.634	116	686.634	627.193	107	520.193	0.757599
1114	3.237	552.277	116	436.277	353.051	107	246.051	0.563979
1115	2.208	378.09	116	262.09	166.556	107	59.556	0.227235
1116	3.403	522.922	116	406.922	195.259	107	88.259	0.216894
1117	3.005	736.713	116	620.713	586.298	107	479.298	0.772173
1118	2.374	799.741	116	683.741	523.07	107	416.07	0.60852
1119	5.727	828.675	116	712.675	488.91	107	381.91	0.535882
1120	5.877	704.492	116	588.492	595.845	107	488.845	0.830674
1121	2.291	544.565	116	428.565	270.877	107	163.877	0.382385
1122	4.997	831.914	116	715.914	459.767	107	352.767	0.492751
1123	2.905	737.989	116	621.989	524.903	107	417.903	0.671882
1124	3.088	684.516	116	568.516	488.07	107	381.07	0.670289
1125	2.241	785.593	116	669.593	460.63	107	353.63	0.528127
1126	3.934	595.658	116	479.658	292.203	107	185.203	0.386115
1127	2.225	823.47	116	707.47	761.067	107	654.067	0.924516
1128	8.782	641.898	116	525.898	303.512	107	196.512	0.373669
1129	2.756	619.096	116	503.096	445.157	107	338.157	0.672152
1130	4.931	802.667	116	686.667	508.963	107	401.963	0.585383
1131	3.569	878.116	116	762.116	619.191	107	512.191	0.672064
1132	7.022	508.889	116	392.889	188.229	107	81.229	0.206748
1133	5.478	661.612	116	545.612	289.976	107	182.976	0.335359
1134	4.648	736.796	116	620.796	304.364	107	197.364	0.317921
1135	5.628	747.805	116	631.805	300.434	107	193.434	0.306161
1136	3.005	757.624	116	641.624	460.37	107	353.37	0.550743
1137	2.158	783.562	116	667.562	779.538	107	672.538	1.00745
1138	4.3	772.911	116	656.911	530.768	107	423.768	0.645092
1139	6.358	978.974	116	862.974	583.984	107	476.984	0.552721
1140	3.984	876.212	116	760.212	820.321	107	713.321	0.938319
1141	4.482	780.356	116	664.356	452.659	107	345.659	0.520292
1142	2.54	825.516	116	709.516	546.255	107	439.255	0.619091
1143	3.519	739.542	116	623.542	421.486	107	314.486	0.504354
1144	2.291	717.87	116	601.87	402.493	107	295.493	0.490958
1145	5.495	829.16	116	713.16	631.958	107	524.958	0.736101
1146	3.37	797.246	116	681.246	462.675	107	355.675	0.522095
1147	2.308	433.626	116	317.626	302.77	107	195.77	0.616354
1148	2.424	575.027	116	459.027	331.808	107	224.808	0.489749
1149	5.163	816.196	116	700.196	501.836	107	394.836	0.563894
1150	3.088	795.124	116	679.124	547.333	107	440.333	0.648384
1151	5.246	843.158	116	727.158	616.579	107	509.579	0.700782
1152	7.471	721.084	116	605.084	567.233	107	460.233	0.76061
1153	6.574	779.455	116	663.455	487.129	107	380.129	0.572954
1154	4.499	807.635	116	691.635	765.269	107	658.269	0.951758
1155	2.955	534.933	116	418.933	351.006	107	244.006	0.582446
1156	3.868	665.279	116	549.279	608.867	107	501.867	0.913683
1157	5.81	747.5	116	631.5	743.111	107	636.111	1.0073
1158	3.27	824.294	116	708.294	928.117	107	821.117	1.15929
1159	2.108	774.205	116	658.205	499.504	107	392.504	0.596325
1160	7.122	749.993	116	633.993	466.925	107	359.925	0.567711
1161	3.37	622.473	116	506.473	275.567	107	168.567	0.332825
1162	2.689	788.228	116	672.228	720.235	107	613.235	0.912243
1163	3.138	708.349	116	592.349	747.122	107	640.122	1.08065
1164	4.499	814.97	116	698.97	398.328	107	291.328	0.416796
1165	4.731	694.733	116	578.733	288.232	107	181.232	0.313153
1166	2.391	803.562	116	687.562	722.438	107	615.438	0.895102
1167	7.205	803.512	116	687.512	899.025	107	792.025	1.15202
1168	5.097	742.567	116	626.567	550.977	107	443.977	0.708587
1169	2.972	586.793	116	470.793	244.313	107	137.313	0.291663
1170	6.873	615.097	116	499.097	334.894	107	227.894	0.456613
1171	3.652	828.086	116	712.086	436.736	107	329.736	0.463056
1172	2.955	807.006	116	691.006	511.916	107	404.916	0.58598
1173	2.922	428.96	116	312.96	226.33	107	119.33	0.381295
1174	2.341	816.277	116	700.277	671.099	107	564.099	0.805537
1175	4.632	788.229	116	672.229	888.036	107	781.036	1.16186
1176	3.984	509.342	116	393.342	463.608	107	356.608	0.906611
1177	7.421	838.345	116	722.345	452.523	107	345.523	0.478335
1178	2.208	791.97	116	675.97	591.602	107	484.602	0.716899
1179	2.988	416.583	116	300.583	223.933	107	116.933	0.389021
1180	2.573	624.11	116	508.11	610.613	107	503.613	0.99115
1181	4.35	713.141	116	597.141	581.706	107	474.706	0.794965
1182	2.274	748.226	116	632.226	678.036	107	571.036	0.903215
1183	2.075	443.064	116	327.064	396.888	107	289.888	0.886334
1184	2.474	843.235	116	727.235	722.268	107	615.268	0.846037
1185	4.632	666.846	116	550.846	570.477	107	463.477	0.841391
1186	5.279	617.179	116	501.179	379.226	107	272.226	0.543171
1187	4.532	610.81	116	494.81	640.93	107	533.93	1.07906
1188	4.217	778.579	116	662.579	584.563	107	477.563	0.720764
1189	2.872	702.792	116	586.792	472.185	107	365.185	0.622341
1190	3.337	624.856	116	508.856	287.965	107	180.965	0.355631
1191	3.071	679.476	116	563.476	553.324	107	446.324	0.792091
1192	7.886	828.958	116	712.958	619.48	107	512.48	0.718808
1193	3.204	870.715	116	754.715	929.326	107	822.326	1.08958
1194	4.134	495.454	116	379.454	230.743	107	123.743	0.326108
1195	4.183	677.194	116	561.194	456.944	107	349.944	0.62357
1196	3.934	548.354	116	432.354	232.16	107	125.16	0.289485
1197	2.889	415.718	116	299.718	245.615	107	138.615	0.462485
1198	2.225	572.067	116	456.067	261.701	107	154.701	0.339207
1199	2.291	835.536	116	719.536	594.754	107	487.754	0.677873
1200	4.831	448.533	116	332.533	231.316	107	124.316	0.373846
1201	5.545	799.269	116	683.269	455.898	107	348.898	0.510631
1202	3.071	446.243	116	330.243	166.962	107	59.962	0.181569
1203	2.474	745.913	116	629.913	436.973	107	329.973	0.523839
1204	3.818	736.048	116	620.048	349.661	107	242.661	0.391358
1205	10.343	752.196	116	636.196	540.629	107	433.629	0.681597
1206	2.059	719.677	116	603.677	783.782	107	676.782	1.1211
1207	6.624	787.554	116	671.554	588.787	107	481.787	0.717421
1208	2.523	600	116	484	173.138	107	66.138	0.136649
1209	2.772	526.461	116	410.461	235.737	107	128.737	0.31364
1210	2.756	759.747	116	643.747	1120.91	107	1013.91	1.57501
1211	2.059	653.637	116	537.637	397.887	107	290.887	0.541047
1212	3.287	497.439	116	381.439	181.586	107	74.586	0.195538
1213	2.772	479.024	116	363.024	268.257	107	161.257	0.444205
1214	3.42	661.976	116	545.976	258.568	107	151.568	0.277609
1215	2.557	401.851	116	285.851	210.734	107	103.734	0.362895
1216	2.44	392.776	116	276.776	182.32	107	75.32	0.272133
1217	2.391	398.604	116	282.604	195.188	107	88.188	0.312055
1218	2.258	476.272	116	360.272	189.949	107	82.949	0.23024
1219	2.872	588.26	116	472.26	291.058	107	184.058	0.389739
1220	2.723	470.439	116	354.439	203.22	107	96.22	0.271471
1221	6.076	745.577	116	629.577	345.112	107	238.112	0.378209
1222	5.296	597.332	116	481.332	204.006	107	97.006	0.201537
1223	3.553	706.65	116	590.65	555.266	107	448.266	0.758937
1224	3.636	571.831	116	455.831	486.215	107	379.215	0.83192
1225	3.486	485.519	116	369.519	255.61	107	148.61	0.402171
1226	2.407	570.145	116	454.145	198.731	107	91.731	0.201986
1227	4.383	667.985	116	551.985	323.58	107	216.58	0.392366
1228	3.005	641.873	116	525.873	409.95	107	302.95	0.57609
1229	6.956	634.391	116	518.391	396.045	107	289.045	0.557581
1230	4.366	666.479	116	550.479	435.43	107	328.43	0.596626
1231	5.213	370.975	116	254.975	158.487	107	51.487	0.20193
1232	5.877	757.763	116	641.763	409.847	107	302.847	0.471899
1233	9.595	509.419	116	393.419	276.232	107	169.232	0.430157
1234	3.138	676.09	116	560.09	457.349	107	350.349	0.625523
1235	4.15	560.396	116	444.396	331.164	107	224.164	0.504424
1236	3.47	667.727	116	551.727	447.943	107	340.943	0.617956
1237	3.453	597.221	116	481.221	516.745	107	409.745	0.851469
1238	4.549	703.318	116	587.318	410.46	107	303.46	0.516688
1239	2.092	559.048	116	443.048	322.683	107	215.683	0.486816
1240	5.96	428.195	116	312.195	205.128	107	98.128	0.314316
1241	6.889	652.53	116	536.53	412.07	107	305.07	0.568598
1242	2.523	625.211	116	509.211	430.388	107	323.388	0.635077
1243	2.64	397.717	116	281.717	173.107	107	66.107	0.234657
1244	4.333	375.096	116	259.096	186.874	107	79.874	0.30828
1245	3.802	608.939	116	492.939	394.812	107	287.812	0.583869
1246	2.025	472.295	116	356.295	213.541	107	106.541	0.299025
1247	6.308	605.005	116	489.005	360.966	107	253.966	0.519353
1248	4.897	581.58	116	465.58	346.671	107	239.671	0.514779
1249	2.839	638.696	116	522.696	277.959	107	170.959	0.327072
1250	2.673	517.062	116	401.062	217.689	107	110.689	0.27599
1251	5.113	528.026	116	412.026	335.847	107	228.847	0.555419
1252	7.67	621.987	116	505.987	332.08	107	225.08	0.444834
1253	4.1	372.421	116	256.421	146.846	107	39.846	0.155393
1254	3.436	508	116	392	219.589	107	112.589	0.287217
1255	3.403	543.093	116	427.093	288.941	107	181.941	0.425999
1256	2.789	519.363	116	403.363	353.923	107	246.923	0.612161
1257	3.569	554.712	116	438.712	326.637	107	219.637	0.500641
1258	2.988	466.661	116	350.661	332.794	107	225.794	0.64391
1259	6.01	611.207	116	495.207	326.146	107	219.146	0.442534
1260	2.357	415.718	116	299.718	198.599	107	91.599	0.305617
1261	3.254	544.102	116	428.102	299.056	107	192.056	0.448622
1262	3.055	504.56	116	388.56	230.527	107	123.527	0.31791
1263	4.117	657.754	116	541.754	225.492	107	118.492	0.218719
1264	2.158	501.9	116	385.9	323.3	107	216.3	0.560508
1265	3.403	553.629	116	437.629	515.932	107	408.932	0.934426
1266	2.291	519.123	116	403.123	235.761	107	128.761	0.319409
1267	2.042	457.528	116	341.528	335.366	107	228.366	0.66866
1268	3.901	547.306	116	431.306	227.06	107	120.06	0.278364
1269	2.557	472.416	116	356.416	263.058	107	156.058	0.437854
1270	6.391	405.403	116	289.403	187.265	107	80.265	0.277347
1271	3.47	511.167	116	395.167	259.804	107	152.804	0.386682
1272	5.379	606.343	116	490.343	414.444	107	307.444	0.626998
1273	11.471	567.389	116	451.389	341.355	107	234.355	0.519186
1274	2.938	464.429	116	348.429	186.701	107	79.701	0.228744
1275	2.972	577.112	116	461.112	331.458	107	224.458	0.486775
1276	2.457	556.196	116	440.196	353.392	107	246.392	0.559732
1277	2.357	480.197	116	364.197	139.965	107	32.965	0.0905142
1278	2.723	473.195	116	357.195	234.079	107	127.079	0.355769
1279	2.175	455.275	116	339.275	510.511	107	403.511	1.18933
1280	3.835	434.818	116	318.818	266.082	107	159.082	0.498974
1281	2.739	506.182	116	390.182	404.218	107	297.218	0.761742
1282	3.719	491.21	116	375.21	211.277	107	104.277	0.277916
1283	2.872	418.254	116	302.254	257.48	107	150.48	0.497859
1284	4.582	507.341	116	391.341	318.739	107	211.739	0.54106
1285	2.175	442.053	116	326.053	192.176	107	85.176	0.261234
1286	2.142	477.419	116	361.419	306.814	107	199.814	0.55286
1287	3.569	421.93	116	305.93	275.177	107	168.177	0.549724
1288	2.606	438.809	116	322.809	379.834	107	272.834	0.845187
1289	3.453	511.928	116	395.928	218.635	107	111.635	0.281958
1290	3.254	411.199	116	295.199	183.536	107	76.536	0.259269
1291	10.741	458.396	116	342.396	240.723	107	133.723	0.390551
1292	3.619	468.165	116	352.165	304.459	107	197.459	0.5607
1293	7.238	440.959	116	324.959	219.22	107	112.22	0.345336
1294	2.44	413.905	116	297.905	186.503	107	79.503	0.266874
1295	4.798	420.024	116	304.024	206.969	107	99.969	0.328819
1296	3.287	426.278	116	310.278	199.949	107	92.949	0.299567
1297	2.357	392.43	116	276.43	197.373	107	90.373	0.326929
1298	3.071	448.849	116	332.849	230.546	107	123.546	0.371177
1299	2.042	175.795	102	73.795	118.246	112	6.246	0.0846399
1300	2.059	219.886	102	117.886	193.659	112	81.659	0.692695
1301	2.076	207.129	102	105.129	209.919	112	97.919	0.931418
1302	2.076	194.815	102	92.815	184.121	112	72.121	0.77704
1303	2.076	218.339	102	116.339	250.145	112	138.145	1.18743
1304	2.093	215.096	102	113.096	192.184	112	80.184	0.708991
1305	2.093	198.08	102	96.08	155.28	112	43.28	0.450458
1306	2.093	169.048	102	67.048	134.096	112	22.096	0.329555
1307	2.109	206.333	102	104.333	196.881	112	84.881	0.813559
1308	2.109	173.889	102	71.889	138.341	112	26.341	0.366412
1309	2.126	203.409	102	101.409	142.252	112	30.252	0.298317
1310	2.126	187.142	102	85.142	158.008	112	46.008	0.540368
1311	2.159	194.442	102	92.442	233.581	112	121.581	1.31521
1312	2.193	181.855	102	79.855	154.71	112	42.71	0.534844
1313	2.21	203.667	102	101.667	171.939	112	59.939	0.589562
1314	2.21	203.424	102	101.424	139.576	112	27.576	0.271888
1315	2.26	192.637	102	90.637	152.311	112	40.311	0.444752
1316	2.31	190.326	102	88.326	152.928	112	40.928	0.463374
1317	2.31	168.043	102	66.043	131.507	112	19.507	0.295368
1318	2.327	195.849	102	93.849	147.072	112	35.072	0.373707
1319	2.377	176.148	102	74.148	126.162	112	14.162	0.190996
1320	2.377	216.085	102	114.085	149.275	112	37.275	0.32673
1321	2.411	204.667	102	102.667	139.556	112	27.556	0.268402
1322	2.411	208.479	102	106.479	153.174	112	41.174	0.386687
1323	2.427	205.166	102	103.166	126.228	112	14.228	0.137914
1324	2.427	189.09	102	87.09	132.641	112	20.641	0.237008
1325	2.461	205.51	102	103.51	135.714	112	23.714	0.229099
1326	2.494	215.215	102	113.215	153.926	112	41.926	0.370322
1327	2.511	167.427	102	65.427	136.887	112	24.887	0.380378
1328	2.545	199.974	102	97.974	147.586	112	35.586	0.363219
1329	2.545	200.428	102	98.428	169.178	112	57.178	0.580912
1330	2.561	182.379	102	80.379	207.948	112	95.948	1.19369
1331	2.561	190.105	102	88.105	158.222	112	46.222	0.524624
1332	2.578	221.864	102	119.864	217.571	112	105.571	0.880757
1333	2.578	209.416	102	107.416	143.461	112	31.461	0.292889
1334	2.595	227.116	102	125.116	181.935	112	69.935	0.558961
1335	2.611	183	102	81	154.878	112	42.878	0.529358
1336	2.611	203.167	102	101.167	305.295	112	193.295	1.91065
1337	2.628	186.86	102	84.86	182.032	112	70.032	0.825265
1338	2.645	208.93	102	106.93	204.614	112	92.614	0.866118
1339	2.695	198.255	102	96.255	158.988	112	46.988	0.488162
1340	2.796	198.659	102	96.659	184.21	112	72.21	0.747059
1341	2.896	193.283	102	91.283	195.376	112	83.376	0.913379
1342	2.913	171.885	102	69.885	118.333	112	6.333	0.0906203
1343	2.946	224.341	102	122.341	319.608	112	207.608	1.69696
1344	2.946	172.778	102	70.778	151.051	112	39.051	0.551739
1345	2.98	206.775	102	104.775	226.736	112	114.736	1.09507
1346	3.013	209.306	102	107.306	141.633	112	29.633	0.276154
1347	3.047	185.599	102	83.599	168.148	112	56.148	0.671635
1348	3.063	219.344	102	117.344	134.842	112	22.842	0.194658
1349	3.08	219.902	102	117.902	158.473	112	46.473	0.394166
1350	3.08	224.69	102	122.69	169.69	112	57.69	0.470209
1351	3.08	185.609	102	83.609	179.652	112	67.652	0.809147
1352	3.097	217.092	102	115.092	202.47	112	90.47	0.786067
1353	3.164	196.884	102	94.884	160.804	112	48.804	0.514354
1354	3.214	177.917	102	75.917	171.042	112	59.042	0.777718
1355	3.264	202.185	102	100.185	139	112	27	0.269501
1356	3.281	217.612	102	115.612	167.23	112	55.23	0.477719
1357	3.331	194.879	102	92.879	251.09	112	139.09	1.49754
1358	3.382	188.748	102	86.748	152.495	112	40.495	0.466812
1359	3.465	234.179	102	132.179	205.744	112	93.744	0.70922
1360	3.499	187.651	102	85.651	126.665	112	14.665	0.171218
1361	3.532	209.043	102	107.043	204.616	112	92.616	0.865222
1362	3.683	210.086	102	108.086	166.586	112	54.586	0.505024
1363	3.75	187.17	102	85.17	134.804	112	22.804	0.267747
1364	3.783	221.199	102	119.199	130.894	112	18.894	0.158508
1365	3.783	206.518	102	104.518	168.562	112	56.562	0.54117
1366	3.834	190.843	102	88.843	192.288	112	80.288	0.903707
1367	3.834	210.223	102	108.223	236.092	112	124.092	1.14663
1368	3.85	213.291	102	111.291	184.478	112	72.478	0.651248
1369	4.068	182.469	102	80.469	147.173	112	35.173	0.4371
1370	4.118	245.089	102	143.089	202.207	112	90.207	0.630426
1371	4.118	201.333	102	99.333	197.683	112	85.683	0.862583
1372	4.118	194.118	102	92.118	197.061	112	85.061	0.923392
1373	4.286	218.285	102	116.285	168.91	112	56.91	0.489401
1374	4.47	222.697	102	120.697	146.266	112	34.266	0.283901
1375	4.486	208.026	102	106.026	172.698	112	60.698	0.572482
1376	4.704	215.907	102	113.907	150.527	112	38.527	0.338232
1377	4.737	235.774	102	133.774	155.993	112	43.993	0.328861
1378	4.754	212.803	102	110.803	185.151	112	73.151	0.66019
1379	4.855	195.552	102	93.552	135.286	112	23.286	0.24891
1380	4.922	191.827	102	89.827	160.265	112	48.265	0.537311
1381	5.039	205.757	102	103.757	135.771	112	23.771	0.229103
1382	5.072	202.68	102	100.68	190.314	112	78.314	0.777851
1383	5.123	204.51	102	102.51	184.686	112	72.686	0.709063
1384	5.307	199.779	102	97.779	161.562	112	49.562	0.506878
1385	5.374	212.623	102	110.623	177.589	112	65.589	0.592906
1386	6.227	195.578	102	93.578	162.976	112	50.976	0.544743
1387	6.361	208.108	102	106.108	165.284	112	53.284	0.502168
1388	6.629	194.462	102	92.462	156.596	112	44.596	0.482317
1389	6.914	217.753	102	115.753	177.617	112	65.617	0.566871
1390	7.516	207.138	102	105.138	170.853	112	58.853	0.559769
1391	7.918	193.63	102	91.63	201.679	112	89.679	0.978708
1392	8.286	188.687	102	86.687	145.778	112	33.778	0.389655
1393	8.588	193.246	102	91.246	156.653	112	44.653	0.489369
1394	8.638	201.504	102	99.504	149.814	112	37.814	0.380025
1395	10.245	213.721	102	111.721	168.139	112	56.139	0.502493
1396	20.49	203.984	102	101.984	178.241	112	66.241	0.649523
