# Supplementary material for: Biochemical reconstitution of branching microtubule nucleation
Source: eLife. 2020 Jan 14;9:e49797. doi: 10.7554/eLife.49797 (PMC6959992; doi:10.7554/eLife.49797)
Supplement: Figure 2—source data 2. — Numerical data obtained from the experiment in Figure 2E, and represented graphically in Figure 2F. [file elife-49797-fig2-data2.xlsx]

## Sheet: Augmin only
Microtubule	Area (um^2)	Mean TB intensity	Alexa568 background intensity	Mean minus background	Mean augmin intensity	GFP background intensity	Mean minus background	Mean TPX2 intensity	BFP background intensity	Mean minus background	augmin/TB intensity	TPX2/TB intensity
1	44	464	109.526	354.474	353.705	258.25	95.4549	259.227	286.49	0	0.269286	0
2	167	523.85	109.526	414.324	582.641	258.25	324.391	273.006	286.49	0	0.782941	0
3	19	457.842	109.526	348.315	531.789	258.25	273.539	283.632	286.49	0	0.785319	0
4	125	575.584	109.526	466.057	1278.26	258.25	1020.01	262.224	286.49	0	2.18858	0
5	43	694.628	109.526	585.101	1328.23	258.25	1069.98	297.814	286.49	11.3238	1.82871	0.0193536
6	10	326.6	109.526	217.074	310.9	258.25	52.6499	262.1	286.49	0	0.242544	0
7	254	483.091	109.526	373.565	580.638	258.25	322.388	263.165	286.49	0	0.863005	0
8	33	537.818	109.526	428.291	1213.03	258.25	954.78	295.879	286.49	9.3888	2.22928	0.0219215
9	1119	513.723	109.526	404.196	667.937	258.25	409.687	279.032	286.49	0	1.01358	0
10	252	549.119	109.526	439.593	961.163	258.25	702.913	265.167	286.49	0	1.59901	0
11	108	541.907	109.526	432.381	1024.05	258.25	765.796	273.056	286.49	0	1.77112	0
12	15	345.8	109.526	236.274	571.867	258.25	313.617	262.267	286.49	0	1.32735	0
13	127	489.543	109.526	380.017	513.094	258.25	254.844	259.331	286.49	0	0.670613	0
14	146	514.767	109.526	405.241	705.466	258.25	447.216	287.342	286.49	0.8518	1.10358	0.00210196
15	149	584.98	109.526	475.454	1077.4	258.25	819.153	279.06	286.49	0	1.72289	0
16	69	581.304	109.526	471.777	1095.72	258.25	837.475	306.319	286.49	19.8288	1.77515	0.04203
17	185	529.395	109.526	419.868	583.8	258.25	325.55	288.032	286.49	1.5418	0.775362	0.0036721
18	51	620.039	109.526	510.512	1014.51	258.25	756.26	275.196	286.49	0	1.48137	0
19	142	514.162	109.526	404.636	816.197	258.25	557.947	267.972	286.49	0	1.37889	0
20	30	355.5	109.526	245.974	529.3	258.25	271.05	256.933	286.49	0	1.10195	0
21	175	533.217	109.526	423.69	788.549	258.25	530.299	278.846	286.49	0	1.25162	0
22	155	544.019	109.526	434.493	1086.4	258.25	828.15	292.865	286.49	6.3748	1.90602	0.0146718
23	355	575.668	109.526	466.142	1077.42	258.25	819.173	282	286.49	0	1.75735	0
24	516	508.403	109.526	398.877	664.576	258.25	406.326	277.368	286.49	0	1.01868	0
25	171	562.895	109.526	453.368	882.088	258.25	623.838	272.895	286.49	0	1.37601	0
26	155	511.581	109.526	402.055	611.135	258.25	352.885	279.768	286.49	0	0.877704	0
27	212	483.264	109.526	373.738	613.741	258.25	355.491	266.538	286.49	0	0.951178	0
28	87	596.92	109.526	487.393	1178.77	258.25	920.52	283.333	286.49	0	1.88866	0
29	793	591.769	109.526	482.243	716.712	258.25	458.462	298.073	286.49	11.5828	0.950687	0.0240186
30	187	634	109.526	524.474	696.743	258.25	438.493	294.695	286.49	8.2048	0.836063	0.0156439
31	25	534.44	109.526	424.914	1563.16	258.25	1304.91	295.28	286.49	8.7898	3.071	0.0206861
32	62	558.71	109.526	449.184	1284.9	258.25	1026.65	302.177	286.49	15.6868	2.2856	0.0349229
33	368	557.228	109.526	447.701	821.321	258.25	563.071	290.742	286.49	4.2518	1.25769	0.00949695
34	89	412.191	109.526	302.664	594.18	258.25	335.93	269.382	286.49	0	1.10991	0
35	13	363.538	109.526	254.012	1630.92	258.25	1372.67	310.231	286.49	23.7408	5.40398	0.0934635
36	218	550	109.526	440.474	740.367	258.25	482.117	285.289	286.49	0	1.09454	0
37	137	564.73	109.526	455.204	980.372	258.25	722.122	296.796	286.49	10.3058	1.58637	0.02264
38	14	367.5	109.526	257.974	1672.43	258.25	1414.18	289.071	286.49	2.5808	5.48188	0.0100041
39	46	480.587	109.526	371.06	1068.33	258.25	810.076	292.522	286.49	6.0318	2.18314	0.0162556
40	354	543.107	109.526	433.58	1003.89	258.25	745.643	301.46	286.49	14.9698	1.71973	0.034526
41	268	517.627	109.526	408.1	764.243	258.25	505.993	297.646	286.49	11.1558	1.23987	0.0273359
42	270	521.533	109.526	412.007	1066.02	258.25	807.772	288.952	286.49	2.4618	1.96058	0.00597515
43	51	508.353	109.526	398.827	1191.9	258.25	933.652	273.412	286.49	0	2.341	0
44	144	541.66	109.526	432.133	624.882	258.25	366.632	280.458	286.49	0	0.848423	0
45	41	604.024	109.526	494.498	1326.37	258.25	1068.12	324.683	286.49	38.1928	2.16	0.0772356
46	19	522.368	109.526	412.842	590.316	258.25	332.066	298.158	286.49	11.6678	0.804342	0.0282622
47	379	541.269	109.526	431.743	915.765	258.25	657.515	299.14	286.49	12.6498	1.52293	0.0292994
48	117	672.607	109.526	563.081	1344.46	258.25	1086.21	294.897	286.49	8.4068	1.92905	0.01493
49	61	622	109.526	512.474	1271.46	258.25	1013.21	294.82	286.49	8.3298	1.9771	0.0162541
50	207	509.357	109.526	399.831	729.768	258.25	471.518	285.58	286.49	0	1.17929	0
51	126	540.103	109.526	430.576	1045.05	258.25	786.798	281.579	286.49	0	1.82731	0
52	96	546.958	109.526	437.431	845.521	258.25	587.271	298.896	286.49	12.4058	1.34254	0.0283606
53	165	570.248	109.526	460.722	1059.88	258.25	801.629	292.6	286.49	6.1098	1.73994	0.0132614
54	51	554.686	109.526	445.16	1628.29	258.25	1370.04	294.392	286.49	7.9018	3.07765	0.0177505
55	16	400.5	109.526	290.974	1006.44	258.25	748.188	284.938	286.49	0	2.57133	0
56	18	411.5	109.526	301.974	1254.11	258.25	995.861	279.444	286.49	0	3.29784	0
57	31	389.742	109.526	280.216	748.613	258.25	490.363	282.677	286.49	0	1.74995	0
58	47	477.043	109.526	367.517	897.277	258.25	639.027	310.298	286.49	23.8078	1.73877	0.0647802
59	361	595.69	109.526	486.164	971.382	258.25	713.132	289.346	286.49	2.8558	1.46686	0.00587416
60	23	442.652	109.526	333.125	609.261	258.25	351.011	300.87	286.49	14.3798	1.05369	0.0431663
61	861	504.043	109.526	394.517	742.612	258.25	484.362	291.942	286.49	5.4518	1.22774	0.0138189
62	291	515.9	109.526	406.373	697.151	258.25	438.901	313.54	286.49	27.0498	1.08004	0.0665639
63	119	647.647	109.526	538.12	1125.66	258.25	867.414	303.58	286.49	17.0898	1.61193	0.0317583
64	23	439.87	109.526	330.344	1308.65	258.25	1050.4	301.783	286.49	15.2928	3.17973	0.0462936
65	547	556.861	109.526	447.334	848.157	258.25	589.907	301.071	286.49	14.5808	1.31872	0.0325948
66	93	584.667	109.526	475.141	1066.31	258.25	808.062	293.226	286.49	6.7358	1.70068	0.0141764
67	1439	514.336	109.526	404.81	719.689	258.25	461.439	308.721	286.49	22.2308	1.13989	0.0549167
68	75	572.24	109.526	462.714	1270.71	258.25	1012.46	300.16	286.49	13.6698	2.18809	0.0295427
69	49	698.673	109.526	589.147	1709.08	258.25	1450.83	316.469	286.49	29.9788	2.4626	0.0508851
70	14	485.714	109.526	376.188	797.714	258.25	539.464	294.714	286.49	8.2238	1.43403	0.0218609
71	192	540.302	109.526	430.776	946.432	258.25	688.182	311.807	286.49	25.3168	1.59754	0.0587703
72	66	648.273	109.526	538.746	1257.73	258.25	999.477	308.682	286.49	22.1918	1.85519	0.0411915
73	219	630.16	109.526	520.633	802.507	258.25	544.257	311.84	286.49	25.3498	1.04537	0.0486903
74	30	427.333	109.526	317.807	676.633	258.25	418.383	274.667	286.49	0	1.31647	0
75	30	495.7	109.526	386.173	641.1	258.25	382.85	292.967	286.49	6.4768	0.991394	0.0167717
76	147	621.293	109.526	511.767	821.354	258.25	563.104	300.592	286.49	14.1018	1.10031	0.0275551
77	44	681.25	109.526	571.724	1196.41	258.25	938.159	302.864	286.49	16.3738	1.64093	0.0286394
78	484	488.979	109.526	379.452	669.496	258.25	411.246	316.11	286.49	29.6198	1.08379	0.0780593
79	556	568.272	109.526	458.746	981.822	258.25	723.572	304.468	286.49	17.9778	1.57728	0.039189
80	126	597.77	109.526	488.243	1130.58	258.25	872.329	302.056	286.49	15.5658	1.78667	0.0318812
81	27	428.481	109.526	318.954	1108.96	258.25	850.713	284.37	286.49	0	2.66719	0
82	165	606.152	109.526	496.626	845.533	258.25	587.283	302.909	286.49	16.4188	1.18255	0.0330607
83	154	597.24	109.526	487.714	1126.86	258.25	868.614	293.201	286.49	6.7108	1.78099	0.0137597
84	99	575.798	109.526	466.272	663.737	258.25	405.487	315.283	286.49	28.7928	0.869637	0.0617511
85	14	420.786	109.526	311.26	358.857	258.25	100.607	294.429	286.49	7.9388	0.323225	0.0255054
86	12	400.75	109.526	291.224	335.417	258.25	77.1669	284	286.49	0	0.264975	0
87	99	611.879	109.526	502.353	1292.82	258.25	1034.57	321.051	286.49	34.5608	2.05945	0.0687979
88	10	438.6	109.526	329.074	582.3	258.25	324.05	306.1	286.49	19.6098	0.984734	0.0595909
89	582	511.385	109.526	401.858	796.296	258.25	538.046	311.57	286.49	25.0798	1.33889	0.0624095
90	91	523.473	109.526	413.946	836.967	258.25	578.717	284.077	286.49	0	1.39805	0
91	54	587.241	109.526	477.714	750.204	258.25	491.954	294.722	286.49	8.2318	1.02981	0.0172316
92	526	549.437	109.526	439.911	964.435	258.25	706.185	298.916	286.49	12.4258	1.60529	0.0282462
93	114	537.439	109.526	427.912	794.772	258.25	536.522	289.711	286.49	3.2208	1.25381	0.00752677
94	34	563.765	109.526	454.238	1228.06	258.25	969.809	298.588	286.49	12.0978	2.13502	0.0266331
95	155	596	109.526	486.474	1095.4	258.25	837.15	302.626	286.49	16.1358	1.72085	0.0331689
96	111	606.964	109.526	497.438	1309.29	258.25	1051.04	313.063	286.49	26.5728	2.1129	0.0534194
97	14	470.643	109.526	361.116	357	258.25	98.7499	303.429	286.49	16.9388	0.273457	0.0469067
98	271	556.037	109.526	446.511	945.897	258.25	687.647	304.897	286.49	18.4068	1.54005	0.0412237
99	304	556.727	109.526	447.2	764.105	258.25	505.855	308.737	286.49	22.2468	1.13116	0.0497468
100	10	384.2	109.526	274.673	951.1	258.25	692.85	281.9	286.49	0	2.52245	0
101	199	608.472	109.526	498.945	1155.65	258.25	897.398	308.523	286.49	22.0328	1.79859	0.0441587
102	163	623.933	109.526	514.407	1078.23	258.25	819.977	300.767	286.49	14.2768	1.59403	0.0277539
103	192	604.526	109.526	494.999	819.24	258.25	560.99	299.286	286.49	12.7958	1.13331	0.0258501
104	139	516.079	109.526	406.552	1082.15	258.25	823.901	281.101	286.49	0	2.02655	0
105	90	539.322	109.526	429.796	550.778	258.25	292.528	286.856	286.49	0.3658	0.680621	0.000851102
106	25	449	109.526	339.474	442	258.25	183.75	292.52	286.49	6.0298	0.541279	0.0177622
107	295	542.071	109.526	432.545	737.654	258.25	479.404	331.02	286.49	44.5298	1.10833	0.102948
108	866	468.505	109.526	358.978	542.388	258.25	284.138	281.094	286.49	0	0.791518	0
109	79	625.101	109.526	515.574	784.063	258.25	525.813	312.19	286.49	25.6998	1.01986	0.0498469
110	13	265.308	109.526	155.781	523.846	258.25	265.596	305.077	286.49	18.5868	1.70493	0.119313
111	531	549.414	109.526	439.887	716.166	258.25	457.916	300.454	286.49	13.9638	1.04098	0.031744
112	92	667.315	109.526	557.789	1111.47	258.25	853.217	314.707	286.49	28.2168	1.52964	0.0505869
113	12	529.083	109.526	419.556	626.5	258.25	368.25	287.417	286.49	0.9268	0.877712	0.002209
114	105	608.41	109.526	498.883	757.648	258.25	499.398	293.248	286.49	6.7578	1.00103	0.0135458
115	12	415.167	109.526	305.64	650.667	258.25	392.417	303.083	286.49	16.5928	1.28392	0.0542886
116	31	524.71	109.526	415.184	1221.61	258.25	963.363	324.129	286.49	37.6388	2.32033	0.0906558
117	229	557.803	109.526	448.276	746.485	258.25	488.235	307.659	286.49	21.1688	1.08914	0.0472226
118	896	535.39	109.526	425.863	936.246	258.25	677.996	300.982	286.49	14.4918	1.59205	0.0340292
119	60	504.6	109.526	395.074	905.15	258.25	646.9	282.4	286.49	0	1.63742	0
120	78	524.564	109.526	415.037	646.308	258.25	388.058	285.141	286.49	0	0.934995	0
121	223	568.305	109.526	458.778	1074.54	258.25	816.288	302.197	286.49	15.7068	1.77926	0.0342361
122	333	510.79	109.526	401.264	693.135	258.25	434.885	288.574	286.49	2.0838	1.08379	0.0051931
123	29	615.828	109.526	506.301	992.241	258.25	733.991	288.276	286.49	1.7858	1.44971	0.00352715
124	345	535.496	109.526	425.969	904.18	258.25	645.93	307.284	286.49	20.7938	1.51638	0.0488152
125	332	546.078	109.526	436.551	793.979	258.25	535.729	298.928	286.49	12.4378	1.22718	0.028491
126	76	558.566	109.526	449.04	862.724	258.25	604.474	287.329	286.49	0.8388	1.34615	0.00186799
127	16	539.938	109.526	430.411	1360.19	258.25	1101.94	285.625	286.49	0	2.5602	0
128	12	446.333	109.526	336.807	1802.33	258.25	1544.08	304.083	286.49	17.5928	4.58448	0.0522341
129	82	612.976	109.526	503.45	1009.18	258.25	750.933	321.024	286.49	34.5338	1.49158	0.0685944
130	240	605.092	109.526	495.565	672.317	258.25	414.067	301.7	286.49	15.2098	0.835544	0.0306918
131	499	520.146	109.526	410.619	820.77	258.25	562.52	303.529	286.49	17.0388	1.36993	0.0414954
132	27	658.185	109.526	548.659	1024.3	258.25	766.046	313.519	286.49	27.0288	1.39622	0.0492634
133	16	500.625	109.526	391.099	2178.12	258.25	1919.87	322.875	286.49	36.3848	4.90893	0.0930323
134	16	464.312	109.526	354.786	1657.44	258.25	1399.19	281.812	286.49	0	3.94376	0
135	169	565.178	109.526	455.651	1018.08	258.25	759.833	303.296	286.49	16.8058	1.66757	0.036883
136	403	520.308	109.526	410.781	1186.78	258.25	928.534	320.32	286.49	33.8298	2.26041	0.0823547
137	906	508.708	109.526	399.182	681.694	258.25	423.444	306.256	286.49	19.7658	1.06078	0.0495158
138	351	492.974	109.526	383.447	838.766	258.25	580.516	323.285	286.49	36.7948	1.51394	0.0959579
139	10	379.1	109.526	269.574	263.8	258.25	5.5499	276.1	286.49	0	0.0205877	0
140	18	462.5	109.526	352.974	1073.89	258.25	815.639	294.944	286.49	8.4538	2.31077	0.0239502
141	30	448.8	109.526	339.274	419.933	258.25	161.683	277.167	286.49	0	0.476556	0
142	92	535.837	109.526	426.31	1036.9	258.25	778.652	302.13	286.49	15.6398	1.82649	0.0366864
143	242	573.901	109.526	464.374	803.835	258.25	545.585	313.517	286.49	27.0268	1.17488	0.0582004
144	97	598.598	109.526	489.071	967.278	258.25	709.028	285.835	286.49	0	1.44974	0
145	47	570.532	109.526	461.006	1005.98	258.25	747.729	292.255	286.49	5.7648	1.62195	0.0125048
146	157	573.465	109.526	463.939	998.115	258.25	739.865	290.274	286.49	3.7838	1.59475	0.00815582
147	31	561.71	109.526	452.184	897.452	258.25	639.202	310.129	286.49	23.6388	1.41359	0.052277
148	10	397	109.526	287.474	925.8	258.25	667.55	304.1	286.49	17.6098	2.32213	0.0612571
149	556	503.072	109.526	393.546	629.007	258.25	370.757	308.878	286.49	22.3878	0.942094	0.0568875
150	199	579.608	109.526	470.081	863.558	258.25	605.308	318.96	286.49	32.4698	1.28767	0.0690727
151	91	563.154	109.526	453.627	773.901	258.25	515.651	327.56	286.49	41.0698	1.13673	0.0905364
152	13	405.615	109.526	296.089	653.846	258.25	395.596	324.231	286.49	37.7408	1.33607	0.127465
153	29	553.172	109.526	443.646	1370.79	258.25	1112.54	323.069	286.49	36.5788	2.50773	0.0824505
154	14	343.857	109.526	234.331	892.5	258.25	634.25	319.286	286.49	32.7958	2.70665	0.139955
155	126	572.651	109.526	463.124	871.889	258.25	613.639	286.865	286.49	0.3748	1.325	0.000809286
156	132	532.356	109.526	422.829	894.106	258.25	635.856	277.03	286.49	0	1.50381	0
157	10	407.6	109.526	298.074	2154	258.25	1895.75	308.1	286.49	21.6098	6.36001	0.0724982
158	33	515.727	109.526	406.2	791.515	258.25	533.265	295.424	286.49	8.9338	1.31281	0.0219936
159	55	680.291	109.526	570.764	1734.31	258.25	1476.06	315.909	286.49	29.4188	2.58611	0.0515428
160	54	392.963	109.526	283.437	722.685	258.25	464.435	292.296	286.49	5.8058	1.63859	0.0204836
161	42	652.952	109.526	543.426	1063	258.25	804.75	327.476	286.49	40.9858	1.48088	0.0754212
162	662	506.616	109.526	397.089	703.071	258.25	444.821	314.216	286.49	27.7258	1.1202	0.0698225
163	103	490.971	109.526	381.445	1152.9	258.25	894.653	312.262	286.49	25.7718	2.34543	0.0675637
164	415	540.648	109.526	431.122	681.627	258.25	423.377	301.651	286.49	15.1608	0.982036	0.035166
165	16	436.188	109.526	326.661	1766.69	258.25	1508.44	298.625	286.49	12.1348	4.61774	0.0371479
166	154	559.539	109.526	450.012	949.273	258.25	691.023	328.292	286.49	41.8018	1.53556	0.0928903
167	14	417.857	109.526	308.331	551.357	258.25	293.107	308.714	286.49	22.2238	0.950626	0.0720779
168	468	525.679	109.526	416.152	748.85	258.25	490.6	306.598	286.49	20.1078	1.17889	0.0483183
169	82	561.427	109.526	451.901	799.573	258.25	541.323	293.354	286.49	6.8638	1.19788	0.0151887
170	64	519.062	109.526	409.536	1161.11	258.25	902.859	323.078	286.49	36.5878	2.20459	0.0893398
171	82	511.451	109.526	401.925	1019.17	258.25	760.921	288.037	286.49	1.5468	1.89319	0.00384848
172	234	538.842	109.526	429.315	1135.78	258.25	877.532	307.201	286.49	20.7108	2.04403	0.0482414
173	191	561.188	109.526	451.661	730.12	258.25	471.87	301.497	286.49	15.0068	1.04474	0.0332258
174	210	513.629	109.526	404.103	626.148	258.25	367.898	286.938	286.49	0.4478	0.910407	0.00110813
175	79	487.722	109.526	378.195	1168.39	258.25	910.142	311.101	286.49	24.6108	2.40654	0.0650743
176	63	498.143	109.526	388.616	916.73	258.25	658.48	298.524	286.49	12.0338	1.69442	0.0309657
177	404	524.384	109.526	414.858	873.453	258.25	615.203	307.743	286.49	21.2528	1.48293	0.0512292
178	117	520.077	109.526	410.55	732.205	258.25	473.955	294.949	286.49	8.4588	1.15444	0.0206036
179	33	378.061	109.526	268.534	810.636	258.25	552.386	264.364	286.49	0	2.05704	0
180	12	386.333	109.526	276.807	367.5	258.25	109.25	290.417	286.49	3.9268	0.39468	0.0141861
181	139	456.165	109.526	346.639	639.763	258.25	381.513	262.597	286.49	0	1.10061	0
182	20	442.85	109.526	333.324	1189.65	258.25	931.4	299.45	286.49	12.9598	2.79428	0.0388805
183	152	527.243	109.526	417.717	1009.03	258.25	750.776	314.697	286.49	28.2068	1.79733	0.0675262
184	323	522.985	109.526	413.459	808.548	258.25	550.298	305.446	286.49	18.9558	1.33096	0.0458469
185	18	560.222	109.526	450.695	1140.72	258.25	882.472	306.611	286.49	20.1208	1.95802	0.0446439
186	16	491.688	109.526	382.161	1120.75	258.25	862.5	313.938	286.49	27.4478	2.2569	0.0718225
187	69	598.449	109.526	488.922	1047.91	258.25	789.663	289.043	286.49	2.5528	1.61511	0.00522128
188	437	503.936	109.526	394.409	630.737	258.25	372.487	291.895	286.49	5.4048	0.944417	0.0137035
189	505	475.291	109.526	365.764	997.513	258.25	739.263	299.749	286.49	13.2588	2.02114	0.0362496
190	223	493.081	109.526	383.555	603.713	258.25	345.463	283.462	286.49	0	0.900688	0
191	580	491.488	109.526	381.962	707.909	258.25	449.659	299.433	286.49	12.9428	1.17724	0.0338851
192	48	336.854	109.526	227.327	589.208	258.25	330.958	282.854	286.49	0	1.45586	0
193	92	588.457	109.526	478.93	928.098	258.25	669.848	311	286.49	24.5098	1.39863	0.0511761
194	32	578.562	109.526	469.036	1359.34	258.25	1101.09	303.281	286.49	16.7908	2.34757	0.0357986
195	12	258.25	109.526	148.724	339.75	258.25	81.4999	287.833	286.49	1.3428	0.547996	0.00902884
196	89	615.978	109.526	506.451	825.236	258.25	566.986	306.978	286.49	20.4878	1.11953	0.0404536
197	361	536.751	109.526	427.224	864.587	258.25	606.337	312.693	286.49	26.2028	1.41925	0.0613326
198	111	600.306	109.526	490.78	887.586	258.25	629.336	300.387	286.49	13.8968	1.28232	0.0283158
199	46	573.413	109.526	463.887	1746.28	258.25	1488.03	304.891	286.49	18.4008	3.20775	0.0396666
200	197	515.68	109.526	406.153	1034.55	258.25	776.303	303.878	286.49	17.3878	1.91135	0.0428109
201	17	529.824	109.526	420.297	853.706	258.25	595.456	310.882	286.49	24.3918	1.41675	0.0580346
202	148	523.622	109.526	414.095	770.236	258.25	511.986	304.662	286.49	18.1718	1.2364	0.0438831
203	57	575.719	109.526	466.193	791.772	258.25	533.522	294.053	286.49	7.5628	1.14442	0.0162225
204	359	453.195	109.526	343.668	801.864	258.25	543.614	284.006	286.49	0	1.5818	0
205	543	430.797	109.526	321.271	788.807	258.25	530.557	278.95	286.49	0	1.65143	0
206	214	558.958	109.526	449.431	663.238	258.25	404.988	299.201	286.49	12.7108	0.901112	0.028282
207	50	455.3	109.526	345.774	1375.48	258.25	1117.23	300.38	286.49	13.8898	3.2311	0.0401702
208	137	541.628	109.526	432.102	875.058	258.25	616.808	302.759	286.49	16.2688	1.42746	0.0376504
209	43	548.326	109.526	438.8	868.14	258.25	609.89	294.535	286.49	8.0448	1.38991	0.0183337
210	40	479.525	109.526	369.998	871.975	258.25	613.725	298.425	286.49	11.9348	1.65872	0.0322563
211	32	445.531	109.526	336.005	1667.31	258.25	1409.06	265.031	286.49	0	4.19358	0
212	10	386.4	109.526	276.873	787.2	258.25	528.95	283.9	286.49	0	1.91044	0
213	59	540.763	109.526	431.237	1414.34	258.25	1156.09	304.136	286.49	17.6458	2.68087	0.0409191
214	38	619.053	109.526	509.526	1035.32	258.25	777.066	297.316	286.49	10.8258	1.52507	0.0212468
215	167	514.647	109.526	405.121	993.527	258.25	735.277	297.275	286.49	10.7848	1.81496	0.0266212
216	850	487.733	109.526	378.207	616.524	258.25	358.274	296.769	286.49	10.2788	0.947297	0.0271777
217	139	469.691	109.526	360.164	945.813	258.25	687.563	288.626	286.49	2.1358	1.90902	0.00593007
218	174	471.626	109.526	362.099	1008.36	258.25	750.112	292.816	286.49	6.3258	2.07156	0.0174698
219	38	498.658	109.526	389.132	1362.39	258.25	1104.14	312.053	286.49	25.5628	2.83746	0.0656919
220	67	505.881	109.526	396.354	750.97	258.25	492.72	290.06	286.49	3.5698	1.24313	0.00900658
221	27	474.63	109.526	365.103	1050.07	258.25	791.824	296.889	286.49	10.3988	2.16877	0.0284818
222	438	488.459	109.526	378.933	830.801	258.25	572.551	286.377	286.49	0	1.51096	0
223	68	536.647	109.526	427.121	773.206	258.25	514.956	286.956	286.49	0.4658	1.20565	0.00109056
224	186	471.812	109.526	362.286	777.296	258.25	519.046	272.027	286.49	0	1.4327	0
225	193	411.301	109.526	301.774	551.311	258.25	293.061	273.71	286.49	0	0.971125	0
226	87	395.103	109.526	285.577	549.506	258.25	291.256	258.609	286.49	0	1.01989	0
227	58	441.276	109.526	331.75	911.724	258.25	653.474	259.897	286.49	0	1.96978	0
228	44	308.273	109.526	198.747	736.023	258.25	477.773	253.932	286.49	0	2.40393	0
229	45	549.044	109.526	439.517	974.444	258.25	716.194	284.622	286.49	0	1.6295	0
230	345	488.525	109.526	378.998	808.699	258.25	550.449	302.449	286.49	15.9588	1.45238	0.0421078
231	13	315.462	109.526	205.935	358.769	258.25	100.519	276.846	286.49	0	0.488109	0
232	17	449	109.526	339.474	1700.12	258.25	1441.87	288.176	286.49	1.6858	4.24737	0.00496593
233	24	461.875	109.526	352.349	554.75	258.25	296.5	298.583	286.49	12.0928	0.841496	0.0343206
234	10	380.6	109.526	271.074	1092.7	258.25	834.45	286.3	286.49	0	3.07832	0

## Sheet: TPX2 only
Microtubule	Area (um^2)	Mean TB intensity	Alexa568 background intensity	Mean minus background	Mean augmin intensity	GFP background intensity	Mean minus background	Mean TPX2 intensity	BFP background intensity	Mean minus background	augmin/TB intensity	TPX2/TB intensity
1	35	521	109.52	411.48	243.771	240.491	3.2797	1548.97	332.212	1216.76	0.0079705	2.95703
2	64	465.859	109.52	356.339	209.344	240.491	0	1556.94	332.212	1224.73	0	3.43697
3	42	427.119	109.52	317.599	209.476	240.491	0	2352.33	332.212	2020.12	0	6.36061
4	94	579.894	109.52	470.374	218.862	240.491	0	2898.56	332.212	2566.35	0	5.45598
5	284	567.201	109.52	457.681	220.028	240.491	0	2091.69	332.212	1759.48	0	3.84433
6	40	577.425	109.52	467.905	218.65	240.491	0	2586.9	332.212	2254.69	0	4.81869
7	12	434.333	109.52	324.813	234.167	240.491	0	1559.42	332.212	1227.21	0	3.77819
8	10	384.3	109.52	274.78	268.6	240.491	28.1087	1425.4	332.212	1093.19	0.102295	3.97842
9	70	436.629	109.52	327.109	227.986	240.491	0	2316.49	332.212	1984.27	0	6.0661
10	52	427.096	109.52	317.576	201.962	240.491	0	1811.77	332.212	1479.56	0	4.65891
11	20	507.6	109.52	398.08	224.05	240.491	0	2009.55	332.212	1677.34	0	4.21357
12	49	482.184	109.52	372.664	209.184	240.491	0	1437.8	332.212	1105.58	0	2.96671
13	51	756.706	109.52	647.186	286.882	240.491	46.3907	2177.88	332.212	1845.67	0.0716807	2.85184
14	55	675.055	109.52	565.535	242.618	240.491	2.1267	2149.42	332.212	1817.21	0.00376051	3.21325
15	51	568.451	109.52	458.931	218.059	240.491	0	1843.26	332.212	1511.04	0	3.29253
16	250	599.468	109.52	489.948	225.228	240.491	0	2330.88	332.212	1998.66	0	4.07934
17	14	430.071	109.52	320.551	222.143	240.491	0	1524.36	332.212	1192.15	0	3.71905
18	36	507.917	109.52	398.397	260.806	240.491	20.3147	3462.53	332.212	3130.32	0.0509911	7.85728
19	76	587.513	109.52	477.993	215.434	240.491	0	1993.58	332.212	1661.37	0	3.47572
20	147	679.122	109.52	569.602	239.959	240.491	0	2138.71	332.212	1806.5	0	3.17152
21	52	540.75	109.52	431.23	233.096	240.491	0	2054.96	332.212	1722.75	0	3.99497
22	42	557.786	109.52	448.266	215.952	240.491	0	2435.05	332.212	2102.84	0	4.69105
23	41	517.439	109.52	407.919	223.293	240.491	0	2153.66	332.212	1821.45	0	4.46522
24	17	414.471	109.52	304.951	221.353	240.491	0	1749.88	332.212	1417.67	0	4.64885
25	16	635.562	109.52	526.042	202.5	240.491	0	1526.31	332.212	1194.1	0	2.26997
26	279	651.538	109.52	542.018	235.247	240.491	0	2305.91	332.212	1973.7	0	3.64139
27	87	736.276	109.52	626.756	239.701	240.491	0	2557.52	332.212	2225.31	0	3.55051
28	104	564.077	109.52	454.557	224.317	240.491	0	1909.77	332.212	1577.56	0	3.47054
29	316	595.718	109.52	486.198	232.13	240.491	0	2210.94	332.212	1878.73	0	3.86412
30	416	592.702	109.52	483.182	233.553	240.491	0	1780.96	332.212	1448.75	0	2.99835
31	16	555.688	109.52	446.168	202.125	240.491	0	2157.81	332.212	1825.6	0	4.09173
32	84	630.833	109.52	521.313	228.833	240.491	0	2073.82	332.212	1741.61	0	3.34081
33	286	547.395	109.52	437.875	232.462	240.491	0	2982.32	332.212	2650.11	0	6.05222
34	370	639.392	109.52	529.872	232.938	240.491	0	2305.51	332.212	1973.29	0	3.7241
35	42	787.119	109.52	677.599	252.167	240.491	11.6757	2252.98	332.212	1920.76	0.017231	2.83466
36	151	654.954	109.52	545.434	237.801	240.491	0	2663.47	332.212	2331.26	0	4.27414
37	187	618.888	109.52	509.368	232.316	240.491	0	2601.91	332.212	2269.7	0	4.45591
38	130	567.085	109.52	457.565	234.115	240.491	0	2333.91	332.212	2001.7	0	4.37469
39	203	682.576	109.52	573.056	249.847	240.491	9.3557	2270.63	332.212	1938.41	0.016326	3.38259
40	264	599.496	109.52	489.976	232.015	240.491	0	2386.34	332.212	2054.13	0	4.19231
41	89	615.562	109.52	506.042	227.494	240.491	0	2087.93	332.212	1755.72	0	3.46952
42	63	635.444	109.52	525.924	237.349	240.491	0	2190.29	332.212	1858.07	0	3.53297
43	17	500.647	109.52	391.127	239.353	240.491	0	2434.76	332.212	2102.55	0	5.37563
44	291	614.584	109.52	505.064	239.955	240.491	0	2403.72	332.212	2071.5	0	4.10147
45	194	592.603	109.52	483.083	228.701	240.491	0	2336.51	332.212	2004.29	0	4.14896
46	73	734.397	109.52	624.877	234.479	240.491	0	2301.9	332.212	1969.69	0	3.15213
47	68	552.294	109.52	442.774	230.426	240.491	0	2631.07	332.212	2298.86	0	5.19196
48	29	616.207	109.52	506.687	243.241	240.491	2.7497	2373.55	332.212	2041.34	0.00542682	4.0288
49	245	605.396	109.52	495.876	229.473	240.491	0	2248.84	332.212	1916.63	0	3.86513
50	53	604.019	109.52	494.499	232.566	240.491	0	1972.98	332.212	1640.77	0	3.31805
51	75	529.107	109.52	419.587	217.827	240.491	0	2248.51	332.212	1916.3	0	4.5671
52	104	595.058	109.52	485.538	221.192	240.491	0	2033.29	332.212	1701.08	0	3.50349
53	181	712.16	109.52	602.64	268.646	240.491	28.1547	2145.02	332.212	1812.81	0.046719	3.00812
54	89	542.966	109.52	433.446	227.562	240.491	0	1890.61	332.212	1558.4	0	3.59536
55	302	660.924	109.52	551.404	245.679	240.491	5.1877	2216.7	332.212	1884.48	0.00940817	3.41761
56	13	538.385	109.52	428.865	241.846	240.491	1.3547	1671	332.212	1338.79	0.0031588	3.1217
57	21	530.048	109.52	420.528	243.571	240.491	3.0797	1949.48	332.212	1617.26	0.00732342	3.8458
58	82	618.451	109.52	508.931	247.902	240.491	7.4107	2534.12	332.212	2201.91	0.0145613	4.32654
59	54	432.981	109.52	323.461	212.981	240.491	0	2587.44	332.212	2255.23	0	6.9722
60	256	535.523	109.52	426.003	215.98	240.491	0	2067.75	332.212	1735.53	0	4.074
61	237	557.983	109.52	448.463	221.81	240.491	0	2158.72	332.212	1826.51	0	4.07282
62	18	524.333	109.52	414.813	250.056	240.491	9.5647	1563.61	332.212	1231.4	0.0230579	2.96857
63	134	618.53	109.52	509.01	251.836	240.491	11.3447	3065.39	332.212	2733.18	0.0222878	5.36959
64	30	662.267	109.52	552.747	246.533	240.491	6.0417	2163.4	332.212	1831.19	0.0109303	3.31289
65	92	644.891	109.52	535.371	238	240.491	0	2462.9	332.212	2130.69	0	3.97984
66	68	680.015	109.52	570.495	249.044	240.491	8.5527	2669.66	332.212	2337.45	0.0149917	4.09723
67	184	706.473	109.52	596.953	241.685	240.491	1.1937	2458.21	332.212	2126	0.00199966	3.56141
68	147	575.728	109.52	466.208	220.184	240.491	0	2637.53	332.212	2305.32	0	4.94483
69	27	595.444	109.52	485.924	244.222	240.491	3.7307	3490.33	332.212	3158.12	0.00767754	6.49921
70	24	454.667	109.52	345.147	231.75	240.491	0	2485.75	332.212	2153.54	0	6.23949
71	10	453.3	109.52	343.78	217.8	240.491	0	1903.8	332.212	1571.59	0	4.5715
72	427	620.255	109.52	510.735	253.681	240.491	13.1897	2315.31	332.212	1983.1	0.0258249	3.88283
73	256	591.355	109.52	481.835	251.277	240.491	10.7857	2581.69	332.212	2249.48	0.0223846	4.66856
74	309	623.647	109.52	514.127	265.926	240.491	25.4347	2190.59	332.212	1858.37	0.0494716	3.61462
75	68	588.309	109.52	478.789	230.809	240.491	0	2044.97	332.212	1712.76	0	3.57728
76	227	612.78	109.52	503.26	226.837	240.491	0	2213.27	332.212	1881.06	0	3.73775
77	27	603.667	109.52	494.147	245.259	240.491	4.7677	1942.67	332.212	1610.46	0.00964835	3.25906
78	29	512.379	109.52	402.859	215.793	240.491	0	1617.21	332.212	1285	0	3.18969
79	198	589.707	109.52	480.187	237.348	240.491	0	2255.47	332.212	1923.25	0	4.00522
80	488	581.98	109.52	472.46	240.676	240.491	0.1847	2154.76	332.212	1822.55	0.000390933	3.85757
81	86	680.837	109.52	571.317	264.093	240.491	23.6017	2517.39	332.212	2185.18	0.0413111	3.82482
82	52	699.981	109.52	590.461	243.865	240.491	3.3737	2132.21	332.212	1800	0.00571367	3.04847
83	59	756.203	109.52	646.683	247.932	240.491	7.4407	2138.86	332.212	1806.65	0.011506	2.79372
84	13	362.231	109.52	252.711	239.615	240.491	0	1428.31	332.212	1096.1	0	4.33735
85	94	701.436	109.52	591.916	276.277	240.491	35.7857	2029.66	332.212	1697.45	0.0604574	2.86772
86	197	724.477	109.52	614.957	252.325	240.491	11.8337	2406.7	332.212	2074.48	0.0192431	3.37338
87	28	618.893	109.52	509.373	233.25	240.491	0	2128.11	332.212	1795.9	0	3.5257
88	164	616.341	109.52	506.821	245.177	240.491	4.6857	1920.53	332.212	1588.32	0.00924528	3.13389
89	641	647.136	109.52	537.616	245.499	240.491	5.0077	2258.63	332.212	1926.42	0.00931464	3.58326
90	472	563.517	109.52	453.997	243.03	240.491	2.5387	2060.3	332.212	1728.09	0.00559189	3.8064
91	122	637.943	109.52	528.423	243.516	240.491	3.0247	2947.93	332.212	2615.72	0.00572401	4.95006
92	17	499.059	109.52	389.539	229.941	240.491	0	1829.53	332.212	1497.32	0	3.84382
93	130	532	109.52	422.48	261.715	240.491	21.2237	2390.57	332.212	2058.36	0.050236	4.87208
94	47	724.404	109.52	614.884	243.596	240.491	3.1047	2106.51	332.212	1774.3	0.00504925	2.88558
95	77	656.61	109.52	547.09	265.182	240.491	24.6907	2341.12	332.212	2008.91	0.045131	3.67198
96	284	682.349	109.52	572.829	253.711	240.491	13.2197	2534.05	332.212	2201.84	0.0230779	3.8438
97	80	778.938	109.52	669.418	243.075	240.491	2.5837	2138.43	332.212	1806.21	0.00385962	2.69819
98	158	654.114	109.52	544.594	248.835	240.491	8.3437	2534.88	332.212	2202.67	0.015321	4.04461
99	546	562.341	109.52	452.821	235.923	240.491	0	2274.94	332.212	1942.72	0	4.29027
100	178	630.708	109.52	521.188	256.118	240.491	15.6267	2844.91	332.212	2512.7	0.0299829	4.8211
101	62	613.161	109.52	503.641	269.097	240.491	28.6057	2166.82	332.212	1834.61	0.0567978	3.6427
102	281	558.829	109.52	449.309	224.06	240.491	0	2484.29	332.212	2152.08	0	4.78975
103	69	856.768	109.52	747.248	261.261	240.491	20.7697	2283.74	332.212	1951.53	0.0277949	2.61162
104	11	428.091	109.52	318.571	230.818	240.491	0	1792.55	332.212	1460.33	0	4.58401
105	512	651.363	109.52	541.843	243.467	240.491	2.9757	1956.24	332.212	1624.03	0.00549181	2.99723
106	246	653.894	109.52	544.374	258.98	240.491	18.4887	2199.11	332.212	1866.9	0.0339632	3.42944
107	323	668.015	109.52	558.495	251.285	240.491	10.7937	2475.89	332.212	2143.68	0.0193264	3.83831
108	149	697.107	109.52	587.587	253.638	240.491	13.1467	2353.42	332.212	2021.2	0.0223741	3.43984
109	118	593.178	109.52	483.658	243.746	240.491	3.2547	2248.95	332.212	1916.74	0.00672934	3.963
110	70	548.114	109.52	438.594	217.029	240.491	0	2388.01	332.212	2055.8	0	4.68726
111	258	634.209	109.52	524.689	275.039	240.491	34.5477	2710.86	332.212	2378.65	0.0658442	4.53345
112	12	372.75	109.52	263.23	228.583	240.491	0	2088.25	332.212	1756.04	0	6.67112
113	68	670.544	109.52	561.024	244.985	240.491	4.4937	2294.09	332.212	1961.88	0.00800982	3.49696
114	14	612.929	109.52	503.409	216.643	240.491	0	1564.36	332.212	1232.15	0	2.4476
115	33	595.424	109.52	485.904	238.939	240.491	0	2464.64	332.212	2132.42	0	4.38857
116	29	673.931	109.52	564.411	232.759	240.491	0	2685.34	332.212	2353.13	0	4.16919
117	279	638.799	109.52	529.279	278.427	240.491	37.9357	2428.19	332.212	2095.98	0.0716743	3.96007
118	45	439.156	109.52	329.636	229.956	240.491	0	1695.33	332.212	1363.12	0	4.13523
119	13	558.846	109.52	449.326	278.077	240.491	37.5857	2076.31	332.212	1744.1	0.0836491	3.88159
120	378	678.434	109.52	568.914	264.167	240.491	23.6757	2493.4	332.212	2161.19	0.0416156	3.7988
121	145	597.338	109.52	487.818	267.255	240.491	26.7637	2300.23	332.212	1968.02	0.0548641	4.03433
122	258	601.105	109.52	491.585	241.857	240.491	1.3657	2296.76	332.212	1964.55	0.00277816	3.99636
123	861	601.696	109.52	492.176	260.635	240.491	20.1437	2357.82	332.212	2025.61	0.0409279	4.11562
124	336	650.17	109.52	540.65	265.235	240.491	24.7437	2346.22	332.212	2014.01	0.0457666	3.72517
125	196	657.679	109.52	548.159	248.526	240.491	8.0347	2220.63	332.212	1888.42	0.0146576	3.44502
126	23	643.348	109.52	533.828	268.609	240.491	28.1177	2408.22	332.212	2076.01	0.0526719	3.8889
127	31	649.226	109.52	539.706	234.516	240.491	0	2132.26	332.212	1800.05	0	3.33524
128	13	427.538	109.52	318.018	218.615	240.491	0	1523.15	332.212	1190.94	0	3.74489
129	89	681.775	109.52	572.255	291.416	240.491	50.9247	2303.85	332.212	1971.64	0.0889896	3.44539
130	479	607.353	109.52	497.833	268.756	240.491	28.2647	2691.68	332.212	2359.47	0.0567755	4.73948
131	15	643.267	109.52	533.747	254.933	240.491	14.4417	1593.93	332.212	1261.72	0.0270572	2.36389
132	289	577.841	109.52	468.321	251	240.491	10.5087	2172	332.212	1839.79	0.0224391	3.92847
133	110	682.209	109.52	572.689	247.209	240.491	6.7177	2701.55	332.212	2369.34	0.0117301	4.13723
134	10	439	109.52	329.48	279.9	240.491	39.4087	1325.6	332.212	993.388	0.119609	3.01502
135	62	570.129	109.52	460.609	279.597	240.491	39.1057	2544.36	332.212	2212.14	0.0849	4.80265
136	217	619.341	109.52	509.821	272.562	240.491	32.0707	2980.51	332.212	2648.3	0.0629058	5.19456
137	10	421.7	109.52	312.18	192	240.491	0	911.8	332.212	579.588	0	1.85658
138	286	603.552	109.52	494.032	254.944	240.491	14.4527	2156.42	332.212	1824.21	0.0292546	3.6925
139	10	321.2	109.52	211.68	232.9	240.491	0	1021.9	332.212	689.688	0	3.25817
140	11	461.545	109.52	352.025	268.909	240.491	28.4177	2252.64	332.212	1920.42	0.0807264	5.45537
141	236	613.441	109.52	503.921	270.038	240.491	29.5467	2563.07	332.212	2230.86	0.0586336	4.42701
142	48	506.625	109.52	397.105	213.25	240.491	0	2256.83	332.212	1924.62	0	4.84663
143	169	694.598	109.52	585.078	253.183	240.491	12.6917	2019.15	332.212	1686.94	0.0216923	2.88327
144	14	483.786	109.52	374.266	245.214	240.491	4.7227	1702.93	332.212	1370.72	0.0126186	3.66242
145	13	448.462	109.52	338.942	235.846	240.491	0	962.538	332.212	630.326	0	1.85969
146	12	530	109.52	420.48	261	240.491	20.5087	1785.25	332.212	1453.04	0.0487745	3.45567
147	370	678.07	109.52	568.55	274.886	240.491	34.3947	2520.84	332.212	2188.62	0.0604955	3.84948
148	224	588.786	109.52	479.266	231.562	240.491	0	2088.51	332.212	1756.3	0	3.66457
149	18	516.444	109.52	406.924	247.778	240.491	7.2867	1300.44	332.212	968.232	0.0179068	2.37939
150	154	688.584	109.52	579.064	234.786	240.491	0	1673.53	332.212	1341.31	0	2.31635
151	83	738.892	109.52	629.372	300.145	240.491	59.6537	2221.76	332.212	1889.55	0.0947829	3.00228
152	52	665.327	109.52	555.807	270.038	240.491	29.5467	2760.25	332.212	2428.04	0.05316	4.36849
153	391	576.675	109.52	467.155	231.409	240.491	0	1982.75	332.212	1650.54	0	3.53317
154	211	555.1	109.52	445.58	246.209	240.491	5.7177	2319.16	332.212	1986.95	0.012832	4.45924
155	51	546.843	109.52	437.323	218.784	240.491	0	2211.92	332.212	1879.71	0	4.29822
156	12	419.083	109.52	309.563	237.333	240.491	0	1685.5	332.212	1353.29	0	4.37161
157	60	691.467	109.52	581.947	268.517	240.491	28.0257	2344.53	332.212	2012.32	0.0481585	3.45791
158	328	650.695	109.52	541.175	256.482	240.491	15.9907	2065.23	332.212	1733.02	0.0295481	3.20232
159	236	676.131	109.52	566.611	272.983	240.491	32.4917	2382.13	332.212	2049.92	0.0573439	3.61785
160	464	588.388	109.52	478.868	263.897	240.491	23.4057	2297.53	332.212	1965.32	0.0488772	4.10409
161	90	669.867	109.52	560.347	270.656	240.491	30.1647	2860.73	332.212	2528.52	0.0538322	4.51242
162	114	556.596	109.52	447.076	231.061	240.491	0	2155.82	332.212	1823.61	0	4.07898
163	12	386	109.52	276.48	230.833	240.491	0	1653.08	332.212	1320.87	0	4.77746
164	94	553	109.52	443.48	222.468	240.491	0	2342.74	332.212	2010.53	0	4.53354
165	37	642.054	109.52	532.534	298.27	240.491	57.7787	2009.6	332.212	1677.38	0.108498	3.14982
166	351	590.519	109.52	480.999	232.638	240.491	0	2197.15	332.212	1864.94	0	3.87722
167	43	704.256	109.52	594.736	263.651	240.491	23.1597	2575.77	332.212	2243.56	0.0389412	3.77236
168	105	613.362	109.52	503.842	249.419	240.491	8.9277	2411.76	332.212	2079.55	0.0177193	4.12739
169	54	689.926	109.52	580.406	265.5	240.491	25.0087	2568.56	332.212	2236.34	0.0430883	3.85307
170	74	614.811	109.52	505.291	265.514	240.491	25.0227	2906.88	332.212	2574.67	0.0495214	5.09541
171	212	631.047	109.52	521.527	269.005	240.491	28.5137	2742.03	332.212	2409.82	0.0546735	4.6207
172	54	517.87	109.52	408.35	217.37	240.491	0	2582.17	332.212	2249.96	0	5.50987
173	477	574.103	109.52	464.583	267.818	240.491	27.3267	2767.27	332.212	2435.05	0.0588199	5.24138
174	64	584.812	109.52	475.292	271.609	240.491	31.1177	2822.64	332.212	2490.43	0.0654707	5.23979
175	49	490.306	109.52	380.786	219.102	240.491	0	1984.86	332.212	1652.65	0	4.34009
176	182	676.819	109.52	567.299	263.319	240.491	22.8277	2563.14	332.212	2230.93	0.0402393	3.93255
177	34	520.5	109.52	410.98	248.971	240.491	8.4797	1928.91	332.212	1596.7	0.0206329	3.88511
178	106	545.83	109.52	436.31	227.34	240.491	0	2192.98	332.212	1860.77	0	4.26479
179	47	469.404	109.52	359.884	217.915	240.491	0	1998.36	332.212	1666.15	0	4.62969
180	71	709.479	109.52	599.959	250.845	240.491	10.3537	2389.82	332.212	2057.61	0.0172574	3.42958
181	263	603.863	109.52	494.343	228.962	240.491	0	2109.07	332.212	1776.85	0	3.59437
182	14	428.5	109.52	318.98	230.571	240.491	0	2083	332.212	1750.79	0	5.48871
183	44	393.795	109.52	284.275	212.227	240.491	0	1650.66	332.212	1318.45	0	4.63793
184	92	647.054	109.52	537.534	265.207	240.491	24.7157	2744.65	332.212	2412.44	0.0459798	4.48798
185	102	381.716	109.52	272.196	205.431	240.491	0	1649.14	332.212	1316.93	0	4.83815
186	32	685.312	109.52	575.792	245.562	240.491	5.0707	2814.44	332.212	2482.23	0.00880648	4.31098
187	421	554.848	109.52	445.328	246.781	240.491	6.2897	2394.01	332.212	2061.8	0.0141238	4.62984
188	350	500.289	109.52	390.769	214.129	240.491	0	2254.18	332.212	1921.97	0	4.91843
189	87	578.575	109.52	469.055	273.724	240.491	33.2327	2970.91	332.212	2638.7	0.0708504	5.62556
190	13	512.231	109.52	402.711	261.769	240.491	21.2777	1443.15	332.212	1110.94	0.0528362	2.75866
191	41	668.098	109.52	558.578	262.878	240.491	22.3867	2269.54	332.212	1937.33	0.040078	3.46832
192	267	638.232	109.52	528.712	269.037	240.491	28.5457	2348.52	332.212	2016.31	0.053991	3.81363
193	105	515.914	109.52	406.394	215.4	240.491	0	1829.24	332.212	1497.03	0	3.68368
194	76	516.658	109.52	407.138	224.737	240.491	0	2277.67	332.212	1945.46	0	4.77838
195	706	542.606	109.52	433.086	271.901	240.491	31.4097	2175.31	332.212	1843.1	0.0725254	4.25573
196	668	550.295	109.52	440.775	234.175	240.491	0	2137.25	332.212	1805.04	0	4.09515
197	30	481.167	109.52	371.647	222.533	240.491	0	2031.33	332.212	1699.12	0	4.57187
198	249	602.092	109.52	492.572	267.775	240.491	27.2837	2694.78	332.212	2362.57	0.0553903	4.79639
199	191	624.361	109.52	514.841	261.309	240.491	20.8177	2153.17	332.212	1820.96	0.0404352	3.53694
200	307	642.29	109.52	532.77	253.86	240.491	13.3687	2661.83	332.212	2329.62	0.0250928	4.37265
201	263	524.426	109.52	414.906	231.137	240.491	0	2305.67	332.212	1973.46	0	4.75641
202	23	564.826	109.52	455.306	267.565	240.491	27.0737	2631.96	332.212	2299.75	0.0594627	5.05099
203	89	590.775	109.52	481.255	244.933	240.491	4.4417	2396.35	332.212	2064.14	0.00922941	4.28907
204	11	428.909	109.52	319.389	257	240.491	16.5087	2075.18	332.212	1742.97	0.0516884	5.45721
205	73	535.301	109.52	425.781	238.767	240.491	0	2704.86	332.212	2372.65	0	5.57247
206	54	618.648	109.52	509.128	237.593	240.491	0	2551.98	332.212	2219.77	0	4.35995
207	18	457	109.52	347.48	217.722	240.491	0	1869.94	332.212	1537.73	0	4.42539
208	23	559.13	109.52	449.61	245.174	240.491	4.6827	2158.48	332.212	1826.27	0.010415	4.06189
209	10	432.6	109.52	323.08	267.4	240.491	26.9087	1571.4	332.212	1239.19	0.0832881	3.83555
210	99	645.788	109.52	536.268	229.061	240.491	0	2304.77	332.212	1972.56	0	3.6783
211	560	506.284	109.52	396.764	247.745	240.491	7.2537	2572.41	332.212	2240.2	0.0182822	5.64617
212	57	593	109.52	483.48	268.807	240.491	28.3157	2426.51	332.212	2094.3	0.0585665	4.33172
213	149	595.349	109.52	485.829	243.51	240.491	3.0187	2115.13	332.212	1782.92	0.00621351	3.66984
214	75	652.4	109.52	542.88	248.587	240.491	8.0957	2727.81	332.212	2395.6	0.0149125	4.41277
215	192	405.198	109.52	295.678	215.943	240.491	0	2282.78	332.212	1950.57	0	6.59694
216	64	700.172	109.52	590.652	288.953	240.491	48.4617	2788.73	332.212	2456.52	0.0820478	4.159
217	297	614.118	109.52	504.598	245.865	240.491	5.3737	2398.16	332.212	2065.95	0.0106495	4.09426
218	112	417.321	109.52	307.801	197.205	240.491	0	1834.55	332.212	1502.33	0	4.88086
219	48	407.625	109.52	298.105	206.562	240.491	0	2091.69	332.212	1759.48	0	5.90221
220	618	564.162	109.52	454.642	259.547	240.491	19.0557	2296.48	332.212	1964.27	0.0419137	4.32048
221	13	409.846	109.52	300.326	264.077	240.491	23.5857	3133.39	332.212	2801.17	0.0785337	9.32712
222	36	586.5	109.52	476.98	232.889	240.491	0	2786.89	332.212	2454.68	0	5.14629
223	50	513.94	109.52	404.42	224.44	240.491	0	1979.34	332.212	1647.13	0	4.07282
224	101	555.901	109.52	446.381	252.218	240.491	11.7267	2580.42	332.212	2248.2	0.0262706	5.03652
225	633	553.703	109.52	444.183	230.202	240.491	0	2431.55	332.212	2099.34	0	4.7263
226	81	494.852	109.52	385.332	240.37	240.491	0	2966.79	332.212	2634.58	0	6.83717
227	383	568.781	109.52	459.261	252.279	240.491	11.7877	2545.84	332.212	2213.63	0.0256667	4.81998
228	113	660.708	109.52	551.188	246.195	240.491	5.7037	2330.98	332.212	1998.77	0.010348	3.6263
229	47	397.617	109.52	288.097	213.553	240.491	0	2881.77	332.212	2549.55	0	8.84964
230	79	383.177	109.52	273.657	187.759	240.491	0	2014.06	332.212	1681.85	0	6.14584
231	47	650.277	109.52	540.757	265.128	240.491	24.6367	2089.23	332.212	1757.02	0.0455597	3.24919
232	155	590.194	109.52	480.674	254.432	240.491	13.9407	2410.23	332.212	2078.01	0.0290024	4.32313
233	26	478.769	109.52	369.249	222.346	240.491	0	1742.31	332.212	1410.1	0	3.81882
234	385	545.21	109.52	435.69	230.719	240.491	0	2349.63	332.212	2017.42	0	4.63041
235	137	514.854	109.52	405.334	250.788	240.491	10.2967	3013.39	332.212	2681.18	0.025403	6.61473
236	77	609.299	109.52	499.779	250.883	240.491	10.3917	2505.78	332.212	2173.57	0.0207926	4.34906
237	94	634.979	109.52	525.459	250.83	240.491	10.3387	3028.03	332.212	2695.82	0.0196756	5.13041
238	19	374.526	109.52	265.006	205.158	240.491	0	2694.95	332.212	2362.74	0	8.91579
239	15	411.533	109.52	302.013	204.133	240.491	0	2320.13	332.212	1987.92	0	6.58224

## Sheet: Augmin then TPX2
Microtubule	Area (um^2)	Mean TB intensity	Alexa568 background intensity	Mean minus background	Mean augmin intensity	GFP background intensity	Mean minus background	Mean TPX2 intensity	BFP background intensity	Mean minus background	augmin/TB intensity	TPX2/TB intensity
1	25	480.92	105.05	375.87	719.64	249.436	470.204	2186.04	311.337	1874.7	1.25097	4.98764
2	14	447	105.05	341.95	861.5	249.436	612.064	2289.86	311.337	1978.52	1.78992	5.786
3	17	347.118	105.05	242.068	501.235	249.436	251.799	2603.65	311.337	2292.31	1.0402	9.4697
4	32	639.312	105.05	534.262	1010.19	249.436	760.752	2734.06	311.337	2422.73	1.42393	4.53472
5	66	627.894	105.05	522.844	671.591	249.436	422.155	1735.35	311.337	1424.01	0.80742	2.72359
6	199	508.673	105.05	403.623	737.578	249.436	488.142	2561.74	311.337	2250.41	1.2094	5.57552
7	37	442.243	105.05	337.193	800.135	249.436	550.699	2533.14	311.337	2221.8	1.63319	6.5891
8	16	409.5	105.05	304.45	803.812	249.436	554.376	2814.62	311.337	2503.29	1.82091	8.22233
9	18	420.833	105.05	315.783	689.889	249.436	440.453	2863.17	311.337	2551.83	1.3948	8.08096
10	183	807.77	105.05	702.72	1015.57	249.436	766.138	2351.96	311.337	2040.63	1.09025	2.9039
11	59	721.051	105.05	616.001	1000.37	249.436	750.937	1715.24	311.337	1403.9	1.21905	2.27906
12	89	745.978	105.05	640.928	1199.7	249.436	950.261	1973.62	311.337	1662.28	1.48263	2.59355
13	10	480.1	105.05	375.05	1041.3	249.436	791.864	2001.7	311.337	1690.36	2.11136	4.50704
14	128	651.094	105.05	546.044	763.852	249.436	514.416	2469.04	311.337	2157.7	0.942078	3.95152
15	201	553.343	105.05	448.293	599.751	249.436	350.315	2212.58	311.337	1901.25	0.781442	4.24108
16	43	542.326	105.05	437.276	1101.02	249.436	851.587	2517.79	311.337	2206.45	1.94748	5.04591
17	74	427.122	105.05	322.072	603.5	249.436	354.064	3118.64	311.337	2807.3	1.09933	8.71637
18	23	541.696	105.05	436.646	1283.3	249.436	1033.87	2773.09	311.337	2461.75	2.36775	5.63786
19	252	637.115	105.05	532.065	882.671	249.436	633.235	2510.5	311.337	2199.17	1.19015	4.13327
20	26	562.231	105.05	457.181	1147.62	249.436	898.179	2617.5	311.337	2306.16	1.9646	5.04431
21	213	686.207	105.05	581.157	839.042	249.436	589.606	2897.61	311.337	2586.27	1.01454	4.45021
22	43	781.349	105.05	676.299	1559.72	249.436	1310.28	2284.33	311.337	1972.99	1.93743	2.91733
23	62	624.774	105.05	519.724	1159.48	249.436	910.048	2463.57	311.337	2152.23	1.75102	4.1411
24	18	571.722	105.05	466.672	1076.39	249.436	826.953	2098.5	311.337	1787.16	1.77202	3.82959
25	124	670.29	105.05	565.24	793.411	249.436	543.975	2331.29	311.337	2019.95	0.962378	3.57362
26	135	536.378	105.05	431.328	943.526	249.436	694.09	3279.71	311.337	2968.37	1.60919	6.88194
27	88	617.227	105.05	512.177	584.989	249.436	335.553	2850.57	311.337	2539.23	0.65515	4.95772
28	74	572.838	105.05	467.788	389.77	249.436	140.334	2457.22	311.337	2145.88	0.299994	4.58729
29	138	696.688	105.05	591.638	1517.67	249.436	1268.24	2593.91	311.337	2282.57	2.1436	3.85805
30	255	758.788	105.05	653.738	989.341	249.436	739.905	2507.91	311.337	2196.58	1.13181	3.36003
31	134	612.388	105.05	507.338	920.799	249.436	671.363	2588.55	311.337	2277.22	1.3233	4.48856
32	72	605.847	105.05	500.797	959.792	249.436	710.356	2926.93	311.337	2615.59	1.41845	5.22286
33	19	622.737	105.05	517.687	2194	249.436	1944.56	2807.68	311.337	2496.35	3.75625	4.82212
34	72	663.681	105.05	558.631	1172.51	249.436	923.078	2842.24	311.337	2530.9	1.65239	4.53054
35	419	651.532	105.05	546.482	670.103	249.436	420.667	2622.16	311.337	2310.82	0.769772	4.22854
36	325	739.815	105.05	634.765	890.92	249.436	641.484	2183.39	311.337	1872.05	1.01058	2.9492
37	115	543.148	105.05	438.098	714.957	249.436	465.521	2879.68	311.337	2568.34	1.0626	5.86248
38	119	698.008	105.05	592.958	736.63	249.436	487.194	1903.71	311.337	1592.38	0.821633	2.68548
39	132	672.439	105.05	567.389	741.75	249.436	492.314	2046.42	311.337	1735.08	0.867683	3.05801
40	246	659.154	105.05	554.104	901.947	249.436	652.511	2075.28	311.337	1763.95	1.1776	3.18343
41	107	762.374	105.05	657.324	1018.95	249.436	769.517	2746.33	311.337	2434.99	1.17068	3.7044
42	227	724.736	105.05	619.686	988.269	249.436	738.833	2782.37	311.337	2471.04	1.19227	3.98756
43	81	592.259	105.05	487.209	718.543	249.436	469.107	2585.7	311.337	2274.37	0.962845	4.66816
44	200	751.72	105.05	646.67	1123.52	249.436	874.084	2433.56	311.337	2122.22	1.35167	3.28177
45	144	751.229	105.05	646.179	913.153	249.436	663.717	2579.66	311.337	2268.32	1.02714	3.51036
46	93	695.366	105.05	590.316	1122.81	249.436	873.37	2636.12	311.337	2324.78	1.4795	3.9382
47	11	465.818	105.05	360.768	1208.91	249.436	959.473	1517	311.337	1205.66	2.65953	3.34194
48	62	803.871	105.05	698.821	1356.58	249.436	1107.14	2765.18	311.337	2453.84	1.5843	3.5114
49	27	567.963	105.05	462.913	904.074	249.436	654.638	2821.18	311.337	2509.85	1.41417	5.42186
50	183	852.372	105.05	747.322	913.809	249.436	664.373	2557.2	311.337	2245.87	0.889005	3.00522
51	171	661.327	105.05	556.277	729.977	249.436	480.541	2342.5	311.337	2031.17	0.863852	3.65136
52	78	726.974	105.05	621.924	1607.74	249.436	1358.31	2345.46	311.337	2034.13	2.18404	3.2707
53	86	672.953	105.05	567.903	775.36	249.436	525.924	2518.05	311.337	2206.71	0.92608	3.88572
54	51	604.392	105.05	499.342	917.608	249.436	668.172	2509.71	311.337	2198.37	1.3381	4.40253
55	124	575.766	105.05	470.716	1210.46	249.436	961.024	3640.74	311.337	3329.41	2.04162	7.07307
56	371	618.951	105.05	513.901	971.008	249.436	721.572	2495.85	311.337	2184.52	1.40411	4.25085
57	217	809.295	105.05	704.245	856.899	249.436	607.463	2679.6	311.337	2368.27	0.862573	3.36285
58	119	725.958	105.05	620.908	1019.26	249.436	769.825	2813.33	311.337	2501.99	1.23984	4.02957
59	10	586.8	105.05	481.75	1108.3	249.436	858.864	951	311.337	639.663	1.7828	1.32779
60	187	715.219	105.05	610.169	1025.33	249.436	775.89	2577.63	311.337	2266.29	1.2716	3.71421
61	85	659.212	105.05	554.162	1336.31	249.436	1086.87	2481.39	311.337	2170.05	1.96129	3.91592
62	66	667.045	105.05	561.995	1563.03	249.436	1313.59	3453.73	311.337	3142.39	2.33738	5.59149
63	151	723.437	105.05	618.387	1061.5	249.436	812.061	2564.8	311.337	2253.46	1.31319	3.64409
64	23	558.522	105.05	453.472	1027.57	249.436	778.129	2163.91	311.337	1852.58	1.71594	4.08532
65	625	808.725	105.05	703.675	908.392	249.436	658.956	2100.38	311.337	1789.04	0.936449	2.54243
66	310	707.697	105.05	602.647	800.206	249.436	550.77	2230.11	311.337	1918.78	0.913918	3.18391
67	821	726.228	105.05	621.178	874.425	249.436	624.989	2251.7	311.337	1940.36	1.00613	3.12368
68	289	655.706	105.05	550.656	980.792	249.436	731.356	2566.18	311.337	2254.84	1.32815	4.09482
69	345	642.504	105.05	537.454	705.072	249.436	455.636	2811.19	311.337	2499.85	0.847767	4.65129
70	150	694.093	105.05	589.043	1102.61	249.436	853.177	2685.93	311.337	2374.6	1.44841	4.03128
71	36	823.833	105.05	718.783	1385.94	249.436	1136.51	2296.5	311.337	1985.16	1.58116	2.76184
72	100	795.2	105.05	690.15	1425.19	249.436	1175.75	2416.86	311.337	2105.52	1.70362	3.05082
73	15	568.133	105.05	463.083	1587.93	249.436	1338.5	3049.67	311.337	2738.33	2.8904	5.91326
74	10	613.6	105.05	508.55	499.7	249.436	250.264	1606.3	311.337	1294.96	0.492112	2.54638
75	52	731.654	105.05	626.604	1264.13	249.436	1014.7	2860.46	311.337	2549.13	1.61936	4.06816
76	10	569.2	105.05	464.15	515	249.436	265.564	910.7	311.337	599.364	0.572151	1.29131
77	359	727.072	105.05	622.022	1336.23	249.436	1086.79	2792.82	311.337	2481.49	1.74719	3.98939
78	46	796.239	105.05	691.189	1555.74	249.436	1306.3	2362.83	311.337	2051.49	1.88994	2.96806
79	113	783.965	105.05	678.915	1380.71	249.436	1131.27	2418.8	311.337	2107.47	1.66629	3.10417
80	50	756.72	105.05	651.67	1287.38	249.436	1037.94	2406.16	311.337	2094.82	1.59274	3.21455
81	706	865.53	105.05	760.48	906.778	249.436	657.342	2709.76	311.337	2398.42	0.864377	3.15383
82	241	784.485	105.05	679.435	1034.72	249.436	785.282	2646.17	311.337	2334.84	1.15579	3.43644
83	80	657.825	105.05	552.775	1763.28	249.436	1513.84	3417.19	311.337	3105.85	2.73862	5.61866
84	282	783.167	105.05	678.117	1037.93	249.436	788.49	2566.67	311.337	2255.33	1.16276	3.32588
85	43	734.186	105.05	629.136	1498.02	249.436	1248.59	2358.74	311.337	2047.41	1.98461	3.25432
86	92	609.913	105.05	504.863	1021.63	249.436	772.194	2727.65	311.337	2416.32	1.52951	4.78608
87	40	871.825	105.05	766.775	1251.38	249.436	1001.94	2337.95	311.337	2026.61	1.30669	2.64304
88	77	746.558	105.05	641.508	1359.65	249.436	1110.21	2925.55	311.337	2614.21	1.73063	4.0751
89	187	782.487	105.05	677.437	1100.01	249.436	850.569	2231.1	311.337	1919.77	1.25557	2.83387
90	487	790.222	105.05	685.172	980.811	249.436	731.375	2107.8	311.337	1796.46	1.06743	2.62191
91	20	761.05	105.05	656	2309.9	249.436	2060.46	2702	311.337	2390.66	3.14095	3.6443
92	81	715.63	105.05	610.58	585.432	249.436	335.996	2334.12	311.337	2022.79	0.550289	3.31289
93	60	727.383	105.05	622.333	1065.68	249.436	816.247	2904.88	311.337	2593.55	1.31159	4.16746
94	94	725.085	105.05	620.035	1187.02	249.436	937.585	2162.04	311.337	1850.71	1.51215	2.98484
95	63	755.825	105.05	650.775	1056.94	249.436	807.501	2598.38	311.337	2287.04	1.24083	3.51434
96	330	775.024	105.05	669.974	865.794	249.436	616.358	2175.5	311.337	1864.16	0.919973	2.78244
97	190	745.663	105.05	640.613	777.211	249.436	527.775	2199.45	311.337	1888.12	0.823859	2.94736
98	11	577.636	105.05	472.586	1868.09	249.436	1618.65	1973.36	311.337	1662.03	3.4251	3.51688
99	113	820.009	105.05	714.959	1204.18	249.436	954.741	2470.79	311.337	2159.45	1.33538	3.02039
100	203	719.951	105.05	614.901	1067.59	249.436	818.15	2561.34	311.337	2250	1.33054	3.65912
101	436	767.541	105.05	662.491	844.041	249.436	594.605	2106.55	311.337	1795.21	0.897529	2.70979
102	266	790.417	105.05	685.367	1073.17	249.436	823.733	2197.06	311.337	1885.73	1.20189	2.75141
103	19	609.421	105.05	504.371	1353.63	249.436	1104.2	2757.37	311.337	2446.03	2.18925	4.84967
104	415	757.61	105.05	652.56	831.783	249.436	582.347	2361.98	311.337	2050.64	0.892403	3.14246
105	63	683.063	105.05	578.013	792.397	249.436	542.961	2800.67	311.337	2489.33	0.939357	4.3067
106	112	640.25	105.05	535.2	707.018	249.436	457.582	2609.14	311.337	2297.81	0.854973	4.29336
107	272	748.29	105.05	643.24	1384.44	249.436	1135.01	2390.23	311.337	2078.89	1.76452	3.23191
108	153	759.196	105.05	654.146	1188.57	249.436	939.133	2560.84	311.337	2249.51	1.43566	3.43885
109	189	797.101	105.05	692.051	1040.65	249.436	791.21	2237.53	311.337	1926.2	1.14328	2.78332
110	127	744.795	105.05	639.745	745.11	249.436	495.674	2128.27	311.337	1816.93	0.774799	2.84009
111	10	621.5	105.05	516.45	2637.2	249.436	2387.76	2080.3	311.337	1768.96	4.62342	3.42524
112	634	644.374	105.05	539.324	904.333	249.436	654.897	2411.8	311.337	2100.46	1.21429	3.89462
113	278	678.86	105.05	573.81	635.309	249.436	385.873	2267.68	311.337	1956.34	0.672475	3.40939
114	28	781.286	105.05	676.236	1909.46	249.436	1660.03	2488.18	311.337	2176.84	2.45481	3.21906
115	18	604.722	105.05	499.672	865	249.436	615.564	2004.78	311.337	1693.44	1.23194	3.38911
116	221	758.14	105.05	653.09	954.9	249.436	705.464	2172.81	311.337	1861.47	1.08019	2.85026
117	602	762.985	105.05	657.935	1237.92	249.436	988.488	2132.24	311.337	1820.9	1.50241	2.7676
118	95	714.674	105.05	609.624	1115.26	249.436	865.827	2496.83	311.337	2185.5	1.42026	3.58499
119	92	644.261	105.05	539.211	767.75	249.436	518.314	2653.03	311.337	2341.7	0.961245	4.34282
120	211	734.545	105.05	629.495	775.621	249.436	526.185	2713.03	311.337	2401.69	0.835884	3.81527
121	18	590.722	105.05	485.672	1088.39	249.436	838.953	2147.94	311.337	1836.61	1.72741	3.78158
122	302	769.361	105.05	664.311	1044.91	249.436	795.475	2618.26	311.337	2306.92	1.19744	3.47265
123	466	690.665	105.05	585.615	967.665	249.436	718.229	2102.68	311.337	1791.35	1.22645	3.05891
124	82	798.805	105.05	693.755	799.366	249.436	549.93	2510.7	311.337	2199.36	0.792686	3.17022
125	226	772.323	105.05	667.273	902.27	249.436	652.834	2247.27	311.337	1935.94	0.978361	2.90127
126	190	819.916	105.05	714.866	934.174	249.436	684.738	2885.82	311.337	2574.48	0.957855	3.60135
127	310	660.274	105.05	555.224	1104.33	249.436	854.893	3093.52	311.337	2782.18	1.53973	5.01091
128	195	760.974	105.05	655.924	1454.63	249.436	1205.19	2377.85	311.337	2066.51	1.83739	3.15054
129	18	501.833	105.05	396.783	1115.83	249.436	866.397	2232.06	311.337	1920.72	2.18355	4.84073
130	88	728.42	105.05	623.37	1453.3	249.436	1203.86	2222.58	311.337	1911.24	1.93121	3.06599
131	117	821.291	105.05	716.241	735.402	249.436	485.966	2307.86	311.337	1996.52	0.678495	2.7875
132	192	624.917	105.05	519.867	665.672	249.436	416.236	2413.02	311.337	2101.68	0.800658	4.04274
133	46	674.478	105.05	569.428	1423.43	249.436	1174	2664.89	311.337	2353.55	2.06172	4.13319
134	177	838.034	105.05	732.984	871.446	249.436	622.01	2457.81	311.337	2146.47	0.848599	2.9284
135	50	567.6	105.05	462.55	1060.9	249.436	811.464	2390.7	311.337	2079.36	1.75433	4.49544
136	77	776.403	105.05	671.353	1453.9	249.436	1204.46	2755.74	311.337	2444.4	1.79408	3.64101
137	28	696.643	105.05	591.593	1960.18	249.436	1710.74	2461	311.337	2149.66	2.89176	3.63369
138	24	721.333	105.05	616.283	2479.83	249.436	2230.4	2967.04	311.337	2655.71	3.61911	4.30923
139	33	723	105.05	617.95	1119.15	249.436	869.716	2381.91	311.337	2070.57	1.40742	3.35071
140	112	656.08	105.05	551.03	665.304	249.436	415.868	2624.97	311.337	2313.64	0.75471	4.19875
141	10	442.6	105.05	337.55	646.6	249.436	397.164	2889.3	311.337	2577.96	1.17661	7.63728
142	42	748.071	105.05	643.021	1079.17	249.436	829.731	2651.43	311.337	2340.09	1.29036	3.63922
143	664	695.486	105.05	590.436	989.518	249.436	740.082	2384.48	311.337	2073.14	1.25345	3.51121
144	114	749.886	105.05	644.836	1501.67	249.436	1252.24	2392.11	311.337	2080.78	1.94195	3.22683
145	44	650.523	105.05	545.473	1279.16	249.436	1029.72	2336.07	311.337	2024.73	1.88776	3.71188
146	10	602.9	105.05	497.85	255.9	249.436	6.4637	996.6	311.337	685.264	0.0129832	1.37645
147	53	806.736	105.05	701.686	1094.41	249.436	844.979	2217.07	311.337	1905.74	1.20421	2.71594
148	10	560.1	105.05	455.05	301.6	249.436	52.1637	1629.6	311.337	1318.26	0.114633	2.89696
149	528	772.04	105.05	666.99	1395.97	249.436	1146.54	2349.93	311.337	2038.59	1.71897	3.05641
150	729	740.399	105.05	635.349	948.602	249.436	699.166	2072.53	311.337	1761.19	1.10044	2.77201
151	46	813.652	105.05	708.602	1341.17	249.436	1091.74	2549.11	311.337	2237.77	1.54069	3.15801
152	69	674.855	105.05	569.805	810.652	249.436	561.216	2559.26	311.337	2247.92	0.984926	3.94508
153	91	857.154	105.05	752.104	1226.44	249.436	977.004	2503.26	311.337	2191.93	1.29903	2.91439
154	365	761.83	105.05	656.78	1003.35	249.436	753.909	2358.92	311.337	2047.58	1.14789	3.11761
155	25	800.4	105.05	695.35	1352.56	249.436	1103.12	2860.48	311.337	2549.14	1.58643	3.66599
156	113	754.965	105.05	649.915	1054.74	249.436	805.307	2686	311.337	2374.66	1.2391	3.65381
157	54	751.463	105.05	646.413	923.833	249.436	674.397	2725.02	311.337	2413.68	1.04329	3.73396
158	10	575.6	105.05	470.55	1686.3	249.436	1436.86	2642.7	311.337	2331.36	3.05358	4.95455
159	250	707.748	105.05	602.698	719.788	249.436	470.352	2388.73	311.337	2077.39	0.78041	3.44682
160	232	801.759	105.05	696.709	803.978	249.436	554.542	2384	311.337	2072.66	0.795945	2.97493
161	23	741.913	105.05	636.863	1212.13	249.436	962.694	3000.83	311.337	2689.49	1.51162	4.22303
162	23	706.435	105.05	601.385	1497.04	249.436	1247.61	2206.17	311.337	1894.84	2.07456	3.15079
163	44	739.682	105.05	634.632	1020.93	249.436	771.496	2468.32	311.337	2156.98	1.21566	3.39879
164	218	699.046	105.05	593.996	647.839	249.436	398.403	2165.82	311.337	1854.48	0.670716	3.12205
165	65	694.923	105.05	589.873	1782.82	249.436	1533.38	2770.72	311.337	2459.39	2.59951	4.16935
166	218	734.422	105.05	629.372	1063.04	249.436	813.605	2669.1	311.337	2357.76	1.29272	3.74622
167	34	644.294	105.05	539.244	1055.62	249.436	806.182	2648.32	311.337	2336.99	1.49502	4.33382
168	111	712.477	105.05	607.427	974.847	249.436	725.411	2705.59	311.337	2394.26	1.19424	3.94164
169	814	667.004	105.05	561.954	940.584	249.436	691.148	2233.17	311.337	1921.83	1.2299	3.41991
170	98	781.735	105.05	676.685	888.776	249.436	639.34	2428.34	311.337	2117	0.944812	3.12849
171	85	711.506	105.05	606.456	771.106	249.436	521.67	2091.53	311.337	1780.19	0.860194	2.9354
172	32	646.906	105.05	541.856	1526.19	249.436	1276.75	2173.25	311.337	1861.91	2.35626	3.43618
173	52	712.481	105.05	607.431	998.385	249.436	748.949	2694.98	311.337	2383.64	1.23298	3.92414
174	117	637.103	105.05	532.053	850.368	249.436	600.932	2924.26	311.337	2612.93	1.12946	4.91103
175	17	665.235	105.05	560.185	2234.24	249.436	1984.8	3196.35	311.337	2885.02	3.54311	5.15011
176	328	774.662	105.05	669.612	949.604	249.436	700.168	2279.96	311.337	1968.62	1.04563	2.93995
177	80	696.125	105.05	591.075	1151.89	249.436	902.452	2601.3	311.337	2289.96	1.5268	3.87424
178	11	552.273	105.05	447.223	494.182	249.436	244.746	2102.82	311.337	1791.48	0.547257	4.00579
179	544	670.281	105.05	565.231	848.147	249.436	598.711	2214.65	311.337	1903.31	1.05923	3.36732
180	56	721.161	105.05	616.111	1742.5	249.436	1493.06	2940.05	311.337	2628.72	2.42337	4.26663
181	62	744	105.05	638.95	1751.95	249.436	1502.52	2384.98	311.337	2073.65	2.35154	3.2454
182	325	715.203	105.05	610.153	941.769	249.436	692.333	2632.65	311.337	2321.31	1.13469	3.80447
183	64	647.281	105.05	542.231	2001.22	249.436	1751.78	3532.48	311.337	3221.15	3.2307	5.94055
184	235	756.506	105.05	651.456	1004.32	249.436	754.879	2410.22	311.337	2098.88	1.15876	3.22183
185	27	627.074	105.05	522.024	1235.89	249.436	986.453	2599.04	311.337	2287.7	1.88967	4.38237
186	102	770.804	105.05	665.754	1277.48	249.436	1028.04	2683.83	311.337	2372.5	1.54418	3.56362
187	350	742.274	105.05	637.224	783.483	249.436	534.047	2582.59	311.337	2271.26	0.838083	3.5643
188	245	816.902	105.05	711.852	1084.48	249.436	835.046	2393.12	311.337	2081.79	1.17306	2.92446
189	152	686.112	105.05	581.062	745.211	249.436	495.775	2326.26	311.337	2014.92	0.853222	3.46765
190	77	735.299	105.05	630.249	1362.99	249.436	1113.55	2558.31	311.337	2246.98	1.76684	3.56522
191	493	702.556	105.05	597.506	905.669	249.436	656.233	2468.69	311.337	2157.35	1.09829	3.61059
192	58	753.379	105.05	648.329	1136.09	249.436	886.65	2097.17	311.337	1785.84	1.36759	2.75452
193	199	693.94	105.05	588.89	782.784	249.436	533.348	2399.03	311.337	2087.69	0.905683	3.54513
194	92	760.685	105.05	655.635	1487.92	249.436	1238.49	2610.83	311.337	2299.49	1.88899	3.50727
195	181	761.343	105.05	656.293	1164.32	249.436	914.884	2200.83	311.337	1889.5	1.39402	2.87905
196	11	542.273	105.05	437.223	2314.27	249.436	2064.84	2986.09	311.337	2674.75	4.72262	6.1176
197	12	604.833	105.05	499.783	433.083	249.436	183.647	1344.92	311.337	1033.58	0.367453	2.06806
198	112	701.848	105.05	596.798	892.83	249.436	643.394	2404.17	311.337	2092.83	1.07808	3.50677
199	294	623.463	105.05	518.413	593.388	249.436	343.952	2975.61	311.337	2664.27	0.663471	5.13929
200	10	618.9	105.05	513.85	2119.7	249.436	1870.26	2464.1	311.337	2152.76	3.63971	4.18948
201	141	778.844	105.05	673.794	842.915	249.436	593.479	2366	311.337	2054.66	0.880802	3.04939
202	73	743.164	105.05	638.114	1658	249.436	1408.56	2657.29	311.337	2345.95	2.20739	3.67638
203	13	539.692	105.05	434.642	2222.39	249.436	1972.95	3100.23	311.337	2788.89	4.53925	6.41653
204	24	707.583	105.05	602.533	872.417	249.436	622.981	2733.38	311.337	2422.04	1.03394	4.01976
205	11	513.273	105.05	408.223	2619.27	249.436	2369.84	3115.36	311.337	2804.03	5.80525	6.86886
206	10	471.3	105.05	366.25	581	249.436	331.564	2122.1	311.337	1810.76	0.905294	4.94407
207	153	728.17	105.05	623.12	966.582	249.436	717.146	2605.75	311.337	2294.42	1.1509	3.68214
208	53	615.849	105.05	510.799	987.887	249.436	738.451	2613.96	311.337	2302.63	1.44568	4.50789
209	18	529.611	105.05	424.561	1130.11	249.436	880.675	2100.17	311.337	1788.83	2.07432	4.21337
210	132	684.75	105.05	579.7	1013.64	249.436	764.208	2413.8	311.337	2102.47	1.31828	3.62682
211	103	692.049	105.05	586.999	1220.65	249.436	971.214	2648.27	311.337	2336.94	1.65454	3.98116
212	50	629.82	105.05	524.77	1030.6	249.436	781.164	2938.42	311.337	2627.08	1.48858	5.00616
213	23	636	105.05	530.95	614.957	249.436	365.521	2356.48	311.337	2045.14	0.688428	3.85185
214	127	588.189	105.05	483.139	815.339	249.436	565.903	2851.11	311.337	2539.77	1.1713	5.25682
215	499	712.234	105.05	607.184	888.146	249.436	638.71	2234.62	311.337	1923.28	1.05192	3.16755
216	14	597.357	105.05	492.307	1641.79	249.436	1392.35	2537.29	311.337	2225.95	2.82821	4.52147
217	136	679.184	105.05	574.134	1408.15	249.436	1158.71	2540.59	311.337	2229.25	2.01819	3.88281
218	212	636.057	105.05	531.007	992.203	249.436	742.767	2578.43	311.337	2267.09	1.39879	4.26941
219	170	713.494	105.05	608.444	1123.29	249.436	873.852	2572.38	311.337	2261.05	1.43621	3.71611
220	77	681.026	105.05	575.976	915.429	249.436	665.993	2998.42	311.337	2687.08	1.15629	4.66526
221	12	562.083	105.05	457.033	502.5	249.436	253.064	1166.92	311.337	855.58	0.55371	1.87203
222	30	699.667	105.05	594.617	1550.73	249.436	1301.3	3112.43	311.337	2801.1	2.18846	4.71076
223	26	764.808	105.05	659.758	1383.96	249.436	1134.53	2985.58	311.337	2674.24	1.71961	4.05337
224	197	652.03	105.05	546.98	734.731	249.436	485.295	2628.12	311.337	2316.78	0.887226	4.23559
225	74	651.338	105.05	546.288	1068.93	249.436	819.496	2803.54	311.337	2492.2	1.50012	4.56207
226	128	598.367	105.05	493.317	746.055	249.436	496.619	2315.01	311.337	2003.67	1.00669	4.06163
227	310	684.239	105.05	579.189	1097.8	249.436	848.361	2906.7	311.337	2595.37	1.46474	4.48104
228	111	665.946	105.05	560.896	1020.89	249.436	771.456	2858.39	311.337	2547.05	1.3754	4.54104
229	71	677.042	105.05	571.992	1198.93	249.436	949.494	2894.2	311.337	2582.86	1.65998	4.51555
230	115	794.287	105.05	689.237	1096.56	249.436	847.121	2517.23	311.337	2205.89	1.22907	3.20048
231	49	597.265	105.05	492.215	1441.1	249.436	1191.67	3250.47	311.337	2939.13	2.42103	5.97124
232	356	647.126	105.05	542.076	894.41	249.436	644.974	2311.26	311.337	1999.93	1.18982	3.68939
233	98	568.694	105.05	463.644	902.224	249.436	652.788	2667.69	311.337	2356.36	1.40795	5.08226
234	139	653.914	105.05	548.864	795.899	249.436	546.463	2553.03	311.337	2241.69	0.995625	4.08424
235	226	584.496	105.05	479.446	556.199	249.436	306.763	2442.35	311.337	2131.01	0.639828	4.44474
236	64	610.344	105.05	505.294	1373.88	249.436	1124.44	3228.28	311.337	2916.94	2.22532	5.77277
237	47	633.383	105.05	528.333	780.277	249.436	530.841	2497.3	311.337	2185.96	1.00475	4.13747
238	30	550.2	105.05	445.15	1033.97	249.436	784.531	2337.47	311.337	2026.13	1.7624	4.55157
239	239	598.983	105.05	493.933	859.795	249.436	610.359	1994.11	311.337	1682.77	1.23571	3.40688
240	10	447.3	105.05	342.25	1262.1	249.436	1012.66	1598.4	311.337	1287.06	2.95884	3.7606
241	29	564	105.05	458.95	1306.17	249.436	1056.74	3755.24	311.337	3443.9	2.30251	7.50388
242	12	532.417	105.05	427.367	1014	249.436	764.564	2958.92	311.337	2647.58	1.78901	6.1951

## Sheet: TPX2 then augmin
Microtubule	Area (um^2)	Mean TB intensity	Alexa568 background intensity	Mean minus background	Mean augmin intensity	GFP background intensity	Mean minus background	Mean TPX2 intensity	BFP background intensity	Mean minus background	augmin/TB intensity	TPX2/TB intensity
1	11	439.455	110.785	328.67	3404.45	382.22	3022.23	2673.91	337.571	2336.34	9.19534	7.10846
2	23	722.087	110.785	611.302	3357.91	382.22	2975.69	2291.43	337.571	1953.86	4.86779	3.19623
3	52	713.731	110.785	602.946	3622.83	382.22	3240.61	2373.67	337.571	2036.1	5.37462	3.37692
4	25	440.4	110.785	329.615	2270.28	382.22	1888.06	1932.28	337.571	1594.71	5.72807	4.83809
5	10	355.6	110.785	244.815	2375.7	382.22	1993.48	2108.8	337.571	1771.23	8.1428	7.23497
6	57	406.07	110.785	295.285	2656.51	382.22	2274.29	2140.25	337.571	1802.68	7.70201	6.10486
7	49	478.347	110.785	367.562	3695.51	382.22	3313.29	2693.18	337.571	2355.61	9.01423	6.40875
8	126	721.746	110.785	610.961	3835.85	382.22	3453.63	2507.12	337.571	2169.55	5.65278	3.55104
9	29	503.759	110.785	392.974	3713	382.22	3330.78	2865.55	337.571	2527.98	8.47582	6.43295
10	16	479.938	110.785	369.153	3859.25	382.22	3477.03	2804.44	337.571	2466.87	9.41894	6.6825
11	12	396.333	110.785	285.548	3380.67	382.22	2998.45	2771.17	337.571	2433.6	10.5007	8.52254
12	59	435.254	110.785	324.469	2691.47	382.22	2309.25	2402.53	337.571	2064.95	7.11702	6.3641
13	127	511.701	110.785	400.916	3515.39	382.22	3133.17	2938.11	337.571	2600.54	7.81502	6.48649
14	75	506.707	110.785	395.922	2898.57	382.22	2516.35	1939.52	337.571	1601.95	6.35568	4.04612
15	420	634.529	110.785	523.744	3629.38	382.22	3247.16	2823.89	337.571	2486.32	6.1999	4.74721
16	118	730.771	110.785	619.986	3875.7	382.22	3493.47	2692.22	337.571	2354.65	5.63476	3.79791
17	90	539.9	110.785	429.115	3349.74	382.22	2967.52	2725.41	337.571	2387.84	6.91545	5.56457
18	16	461.25	110.785	350.465	3514.81	382.22	3132.59	2454.38	337.571	2116.8	8.93838	6.03999
19	37	569.514	110.785	458.729	3833.03	382.22	3450.81	3685.92	337.571	3348.35	7.52254	7.29918
20	43	796.767	110.785	685.982	3875.95	382.22	3493.73	2902.88	337.571	2565.31	5.09304	3.73962
21	83	687.771	110.785	576.986	3676.4	382.22	3294.18	3181.55	337.571	2843.98	5.70928	4.92903
22	68	501.368	110.785	390.583	3721.75	382.22	3339.53	2370.82	337.571	2033.25	8.55011	5.20569
23	143	521.727	110.785	410.942	2810.2	382.22	2427.98	1694.97	337.571	1357.4	5.90833	3.30314
24	49	729.388	110.785	618.603	3519.88	382.22	3137.66	2155.96	337.571	1818.39	5.07217	2.93951
25	197	678.97	110.785	568.185	3441.54	382.22	3059.32	2875.72	337.571	2538.15	5.38438	4.46712
26	42	770.262	110.785	659.477	3934.81	382.22	3552.59	3127.43	337.571	2789.86	5.38698	4.23041
27	41	581.878	110.785	471.093	3872.9	382.22	3490.68	3034.17	337.571	2696.6	7.40975	5.72413
28	134	871.425	110.785	760.64	3462.85	382.22	3080.63	2899.33	337.571	2561.76	4.05005	3.3679
29	61	681.164	110.785	570.379	3602.31	382.22	3220.09	2871.43	337.571	2533.86	5.64553	4.44241
30	178	788.197	110.785	677.412	3283.05	382.22	2900.82	1977.39	337.571	1639.82	4.28222	2.42071
31	56	595.661	110.785	484.876	3881.52	382.22	3499.3	2627.61	337.571	2290.04	7.21689	4.72293
32	171	590	110.785	479.215	3009.47	382.22	2627.25	1984.32	337.571	1646.75	5.4824	3.43635
33	92	558.13	110.785	447.345	3653.68	382.22	3271.46	1429.34	337.571	1091.77	7.31307	2.44055
34	188	712.176	110.785	601.391	3361.76	382.22	2979.53	2887.68	337.571	2550.11	4.9544	4.24034
35	24	679.708	110.785	568.923	3729.12	382.22	3346.9	2503.5	337.571	2165.93	5.88288	3.80707
36	88	637.477	110.785	526.692	3272.92	382.22	2890.7	2074.64	337.571	1737.07	5.48841	3.29807
37	135	691.763	110.785	580.978	3999.37	382.22	3617.15	3079.89	337.571	2742.32	6.22597	4.72017
38	68	793.5	110.785	682.715	3830.96	382.22	3448.74	2886.26	337.571	2548.69	5.0515	3.73317
39	306	547.016	110.785	436.231	3135.69	382.22	2753.47	2159.05	337.571	1821.48	6.31194	4.17548
40	50	677.2	110.785	566.415	3493.04	382.22	3110.82	2226.02	337.571	1888.45	5.49212	3.33404
41	73	700.055	110.785	589.27	3614.01	382.22	3231.79	2513.38	337.571	2175.81	5.4844	3.69239
42	45	594.756	110.785	483.971	3667.6	382.22	3285.38	3074.36	337.571	2736.79	6.78838	5.65485
43	20	704.15	110.785	593.365	3927.7	382.22	3545.48	3175.05	337.571	2837.48	5.97521	4.78201
44	128	842.258	110.785	731.473	3378.18	382.22	2995.96	2453.06	337.571	2115.49	4.09579	2.8921
45	76	720	110.785	609.215	3813.36	382.22	3431.13	2891.39	337.571	2553.82	5.63206	4.19199
46	105	727.781	110.785	616.996	3727.35	382.22	3345.13	2909.94	337.571	2572.37	5.42164	4.16919
47	144	632.944	110.785	522.159	3573.09	382.22	3190.87	2889.12	337.571	2551.55	6.11091	4.88653
48	54	558.759	110.785	447.974	3634.02	382.22	3251.8	2821.11	337.571	2483.54	7.2589	5.54394
49	71	712.873	110.785	602.088	3819.78	382.22	3437.55	2656.96	337.571	2319.39	5.70939	3.85224
50	247	765.316	110.785	654.531	3897.64	382.22	3515.42	2782.09	337.571	2444.51	5.3709	3.73476
51	202	831.431	110.785	720.646	3699.69	382.22	3317.47	2871.83	337.571	2534.26	4.60347	3.51665
52	176	677.114	110.785	566.329	3749.66	382.22	3367.44	1797.31	337.571	1459.74	5.94609	2.57754
53	106	678.094	110.785	567.309	3657.01	382.22	3274.79	2961.95	337.571	2624.38	5.77249	4.62602
54	78	685.269	110.785	574.484	3644.27	382.22	3262.05	2663.03	337.571	2325.46	5.67822	4.0479
55	159	836.27	110.785	725.485	3681.77	382.22	3299.55	2864.2	337.571	2526.62	4.54807	3.48267
56	45	684.067	110.785	573.282	3415.6	382.22	3033.38	2100.38	337.571	1762.81	5.29125	3.07494
57	14	560.429	110.785	449.644	4072.43	382.22	3690.21	3660.71	337.571	3323.14	8.20695	7.39061
58	29	502.414	110.785	391.629	2930.52	382.22	2548.3	2265.14	337.571	1927.57	6.50691	4.92192
59	12	522.167	110.785	411.382	4095	382.22	3712.78	3512.83	337.571	3175.26	9.02514	7.71852
60	516	776.672	110.785	665.887	3384.5	382.22	3002.28	2414.32	337.571	2076.75	4.50869	3.11877
61	41	828.415	110.785	717.63	4016.17	382.22	3633.95	2914.27	337.571	2576.7	5.06382	3.59056
62	112	729.848	110.785	619.063	3938.77	382.22	3556.55	3161.8	337.571	2824.23	5.74505	4.56211
63	287	786.749	110.785	675.964	3778.78	382.22	3396.56	2919.48	337.571	2581.91	5.02477	3.8196
64	134	653.164	110.785	542.379	3970.01	382.22	3587.79	3600.56	337.571	3262.99	6.61492	6.01607
65	372	916.589	110.785	805.804	3628.33	382.22	3246.11	2630.71	337.571	2293.14	4.02841	2.84577
66	14	897.357	110.785	786.572	2566.71	382.22	2184.49	1370.5	337.571	1032.93	2.77723	1.3132
67	190	794.974	110.785	684.189	3923.62	382.22	3541.4	3020.06	337.571	2682.49	5.17606	3.92068
68	50	737.66	110.785	626.875	3953.86	382.22	3571.64	3455.4	337.571	3117.83	5.69753	4.9736
69	88	673.375	110.785	562.59	3696.18	382.22	3313.96	2039.78	337.571	1702.21	5.89054	3.02567
70	19	629.737	110.785	518.952	3576.47	382.22	3194.25	1637.47	337.571	1299.9	6.1552	2.50486
71	40	863.975	110.785	753.19	3545.97	382.22	3163.75	3074.68	337.571	2737.1	4.20047	3.63401
72	58	614.897	110.785	504.112	4008.17	382.22	3625.95	2263.34	337.571	1925.77	7.19275	3.82013
73	35	664.914	110.785	554.129	3975.29	382.22	3593.07	3136.46	337.571	2798.89	6.48417	5.05096
74	51	566.784	110.785	455.999	3381.76	382.22	2999.54	1959.1	337.571	1621.53	6.57796	3.55599
75	24	545.042	110.785	434.257	3591.25	382.22	3209.03	2851.5	337.571	2513.93	7.3897	5.78903
76	113	663.381	110.785	552.596	4050.45	382.22	3668.23	2442.51	337.571	2104.94	6.63818	3.80919
77	312	905.795	110.785	795.01	3882.86	382.22	3500.64	2820.61	337.571	2483.04	4.40327	3.12327
78	125	832.08	110.785	721.295	3787.43	382.22	3405.21	2562.38	337.571	2224.81	4.72097	3.08446
79	10	681.3	110.785	570.515	3629.2	382.22	3246.98	2465.8	337.571	2128.23	5.69131	3.73036
80	205	769.239	110.785	658.454	3710.99	382.22	3328.77	3042.34	337.571	2704.77	5.05543	4.10775
81	72	906.875	110.785	796.09	3831.94	382.22	3449.72	2853.1	337.571	2515.53	4.33333	3.15985
82	78	711.103	110.785	600.318	3750.81	382.22	3368.59	3174.39	337.571	2836.81	5.61134	4.72552
83	132	778.773	110.785	667.988	4022.05	382.22	3639.83	2773.09	337.571	2435.52	5.44895	3.64605
84	29	488.241	110.785	377.456	4020.28	382.22	3638.06	1970.79	337.571	1633.22	9.63835	4.32692
85	15	660.333	110.785	549.548	3734.13	382.22	3351.91	2562.33	337.571	2224.76	6.0994	4.04835
86	27	909	110.785	798.215	3669.52	382.22	3287.3	3023.44	337.571	2685.87	4.11831	3.36485
87	95	747.526	110.785	636.741	3860.91	382.22	3478.68	3029.14	337.571	2691.57	5.46326	4.2271
88	42	757.738	110.785	646.953	4054.48	382.22	3672.26	2971.86	337.571	2634.29	5.67623	4.07183
89	22	822.409	110.785	711.624	3950.18	382.22	3567.96	3336.41	337.571	2998.84	5.01383	4.21408
90	47	809.234	110.785	698.449	3798.3	382.22	3416.08	2328.77	337.571	1991.2	4.89095	2.85088
91	38	795.105	110.785	684.32	4020.63	382.22	3638.41	3179.45	337.571	2841.88	5.31683	4.15285
92	43	838.907	110.785	728.122	3666.95	382.22	3284.73	2986.42	337.571	2648.85	4.51124	3.63792
93	742	790.309	110.785	679.524	3510.96	382.22	3128.74	2406.7	337.571	2069.13	4.60431	3.04497
94	28	728.357	110.785	617.572	3846.32	382.22	3464.1	3324.86	337.571	2987.29	5.60922	4.83715
95	12	638.667	110.785	527.882	4095	382.22	3712.78	3673.42	337.571	3335.85	7.03335	6.3193
96	64	845.75	110.785	734.965	3565.17	382.22	3182.95	3081.12	337.571	2743.55	4.33075	3.7329
97	175	860.246	110.785	749.461	3930.13	382.22	3547.91	3195.66	337.571	2858.09	4.73395	3.81352
98	224	760.964	110.785	650.179	3599.73	382.22	3217.51	2725.06	337.571	2387.49	4.94865	3.67205
99	128	764.742	110.785	653.957	3874.44	382.22	3492.22	2996.09	337.571	2658.52	5.34013	4.06527
100	340	785.521	110.785	674.736	3691.38	382.22	3309.16	2714.13	337.571	2376.56	4.90438	3.52221
101	123	661.52	110.785	550.735	3614.63	382.22	3232.41	2720.41	337.571	2382.84	5.86927	4.32666
102	45	678.4	110.785	567.615	3924.31	382.22	3542.09	3208.27	337.571	2870.7	6.2403	5.05747
103	16	503.875	110.785	393.09	3574.12	382.22	3191.9	3428	337.571	3090.43	8.12003	7.86188
104	451	750.428	110.785	639.643	3560.41	382.22	3178.19	2745.56	337.571	2407.99	4.9687	3.76458
105	62	489.887	110.785	379.102	3742.76	382.22	3360.54	1672.76	337.571	1335.19	8.86447	3.52197
106	115	843.913	110.785	733.128	3830.84	382.22	3448.62	3071.45	337.571	2733.88	4.70398	3.72906
107	370	810.811	110.785	700.026	3577.11	382.22	3194.89	2809.02	337.571	2471.45	4.56396	3.53052
108	151	831.503	110.785	720.718	3944.7	382.22	3562.48	3106.24	337.571	2768.67	4.94296	3.84154
109	430	846.66	110.785	735.875	3505.79	382.22	3123.57	2546.4	337.571	2208.83	4.2447	3.00164
110	189	832.021	110.785	721.236	3498	382.22	3115.78	2314.02	337.571	1976.45	4.32005	2.74036
111	33	729.091	110.785	618.306	3912.61	382.22	3530.39	2199.61	337.571	1862.04	5.70977	3.01151
112	122	858.008	110.785	747.223	3668.86	382.22	3286.64	2837.74	337.571	2500.17	4.39847	3.34594
113	12	764	110.785	653.215	3402.58	382.22	3020.36	2485.75	337.571	2148.18	4.62384	3.28862
114	64	822.828	110.785	712.043	3922.36	382.22	3540.14	2829.39	337.571	2491.82	4.9718	3.49954
115	496	861.085	110.785	750.3	3724.81	382.22	3342.59	2688.31	337.571	2350.74	4.45501	3.13307
116	342	809.722	110.785	698.937	3760.27	382.22	3378.05	2639.31	337.571	2301.74	4.83312	3.29319
117	542	812.915	110.785	702.13	3674.84	382.22	3292.62	2338.55	337.571	2000.98	4.68947	2.84988
118	219	857.073	110.785	746.288	3964.05	382.22	3581.83	2319.09	337.571	1981.52	4.79953	2.65517
119	295	759.051	110.785	648.266	3732.45	382.22	3350.23	3018.24	337.571	2680.67	5.16799	4.13514
120	59	558.525	110.785	447.74	3549.03	382.22	3166.81	2727.53	337.571	2389.95	7.07288	5.33782
121	214	790.762	110.785	679.977	3447.23	382.22	3065.01	2535.28	337.571	2197.71	4.50752	3.23203
122	172	795.535	110.785	684.75	3777.44	382.22	3395.22	3389.79	337.571	3052.22	4.95833	4.45742
123	10	766.6	110.785	655.815	3819	382.22	3436.78	2637.6	337.571	2300.03	5.24047	3.50713
124	183	629.077	110.785	518.292	3526.28	382.22	3144.06	2596.19	337.571	2258.62	6.0662	4.3578
125	42	459.405	110.785	348.62	3940	382.22	3557.78	2190.98	337.571	1853.41	10.2053	5.3164
126	334	815.087	110.785	704.302	3818.39	382.22	3436.17	2768.4	337.571	2430.83	4.87884	3.4514
127	142	761.296	110.785	650.511	3916.76	382.22	3534.54	3364.23	337.571	3026.66	5.43348	4.65274
128	19	783.684	110.785	672.899	3920.68	382.22	3538.46	3149.58	337.571	2812.01	5.25854	4.17894
129	172	728.157	110.785	617.372	3943.38	382.22	3561.16	2932.77	337.571	2595.2	5.76825	4.20363
130	140	832.543	110.785	721.758	3567.5	382.22	3185.28	2999.96	337.571	2662.39	4.41322	3.68876
131	14	795.5	110.785	684.715	3682.64	382.22	3300.42	2759.36	337.571	2421.79	4.82014	3.53693
132	233	637.708	110.785	526.923	3823.59	382.22	3441.37	1913.69	337.571	1576.12	6.53106	2.99117
133	95	859.505	110.785	748.72	3846.42	382.22	3464.2	2194.13	337.571	1856.56	4.62683	2.47964
134	17	369.588	110.785	258.803	3381.76	382.22	2999.54	1079.18	337.571	741.605	11.5901	2.86552
135	19	943	110.785	832.215	4079.79	382.22	3697.57	3243.42	337.571	2905.85	4.44304	3.49171
136	473	821.239	110.785	710.454	3404.77	382.22	3022.55	2235.9	337.571	1898.33	4.2544	2.67199
137	295	846.193	110.785	735.408	3664.54	382.22	3282.32	2782.45	337.571	2444.88	4.46326	3.32452
138	104	626.654	110.785	515.869	3843.15	382.22	3460.93	2887.41	337.571	2549.84	6.70894	4.94281
139	55	767.182	110.785	656.397	4095	382.22	3712.78	3506.31	337.571	3168.74	5.6563	4.82747
140	16	465.062	110.785	354.277	3074.06	382.22	2691.84	1249.19	337.571	911.617	7.59812	2.57318
141	52	657.462	110.785	546.677	3936.6	382.22	3554.38	3029.29	337.571	2691.72	6.50178	4.92378
142	261	709.249	110.785	598.464	3464.52	382.22	3082.3	2646.61	337.571	2309.04	5.15035	3.85827
143	65	752.154	110.785	641.369	4009.32	382.22	3627.1	3034.18	337.571	2696.61	5.65525	4.20447
144	73	886.315	110.785	775.53	3942.18	382.22	3559.96	2930.96	337.571	2593.39	4.59035	3.34402
145	56	668.321	110.785	557.536	3657.05	382.22	3274.83	1862.27	337.571	1524.7	5.87376	2.73471
146	214	749.603	110.785	638.818	3777.22	382.22	3395	3169.21	337.571	2831.64	5.3145	4.43262
147	95	566.653	110.785	455.868	3918.6	382.22	3536.38	2373.65	337.571	2036.08	7.75746	4.46638
148	112	687.696	110.785	576.911	3514.66	382.22	3132.44	2367.66	337.571	2030.09	5.42968	3.5189
149	76	859.539	110.785	748.754	4047.29	382.22	3665.07	3108.38	337.571	2770.81	4.89489	3.70056
150	12	511	110.785	400.215	3770.25	382.22	3388.03	2569.75	337.571	2232.18	8.46552	5.57745
151	13	598.385	110.785	487.6	3880.69	382.22	3498.47	3380.77	337.571	3043.2	7.17488	6.24118
152	144	758.299	110.785	647.514	3785.89	382.22	3403.67	2022.92	337.571	1685.35	5.25652	2.60281
153	245	748.249	110.785	637.464	3767.06	382.22	3384.84	2578.86	337.571	2241.29	5.30985	3.51595
154	25	767.08	110.785	656.295	3649.28	382.22	3267.06	2158.72	337.571	1821.15	4.97803	2.77489
155	73	843.329	110.785	732.544	3720.81	382.22	3338.59	3222.64	337.571	2885.07	4.55752	3.93843
156	17	582.941	110.785	472.156	3629.47	382.22	3247.25	3065.06	337.571	2727.49	6.87749	5.77667
157	292	747.473	110.785	636.688	3764.53	382.22	3382.31	3006.84	337.571	2669.27	5.31235	4.19243
158	81	930.062	110.785	819.277	3878.52	382.22	3496.3	3088.16	337.571	2750.59	4.26754	3.35734
159	143	945.734	110.785	834.949	3651.24	382.22	3269.02	2512.05	337.571	2174.48	3.91524	2.60432
160	206	844.33	110.785	733.545	3975.88	382.22	3593.66	3097.69	337.571	2760.12	4.89903	3.76272
161	72	819	110.785	708.215	4023.15	382.22	3640.93	2705.53	337.571	2367.96	5.141	3.34356
162	15	851.533	110.785	740.748	3174.33	382.22	2792.11	1937.67	337.571	1600.1	3.76931	2.16011
163	69	740.913	110.785	630.128	3638.28	382.22	3256.05	2442	337.571	2104.43	5.16729	3.33968
164	119	810.563	110.785	699.778	3922.32	382.22	3540.1	2232.38	337.571	1894.81	5.05889	2.70773
165	147	706.714	110.785	595.929	3720.87	382.22	3338.65	2861.19	337.571	2523.62	5.60243	4.23476
166	152	875.211	110.785	764.426	3532.94	382.22	3150.72	2849.43	337.571	2511.86	4.12168	3.28594
167	79	920.772	110.785	809.987	3781.22	382.22	3398.99	2678.8	337.571	2341.23	4.19636	2.89045
168	69	841.957	110.785	731.172	3781.58	382.22	3399.36	3063.86	337.571	2726.28	4.64919	3.72865
169	220	746.814	110.785	636.029	3657.7	382.22	3275.48	2588.12	337.571	2250.55	5.14989	3.53843
170	67	776.955	110.785	666.17	3924.95	382.22	3542.73	2791.09	337.571	2453.52	5.31806	3.68302
171	216	772.051	110.785	661.266	3690.34	382.22	3308.12	2794.02	337.571	2456.45	5.00271	3.71476
172	58	849.448	110.785	738.663	4067.17	382.22	3684.95	3436.41	337.571	3098.84	4.98868	4.1952
173	13	568.615	110.785	457.83	3362.61	382.22	2980.39	2262.31	337.571	1924.74	6.50983	4.20404
174	124	869.621	110.785	758.836	4060.32	382.22	3678.09	2908.02	337.571	2570.45	4.84702	3.38736
175	147	797.667	110.785	686.882	3750.09	382.22	3367.87	2739.71	337.571	2402.14	4.90312	3.49717
176	253	669.182	110.785	558.397	3638.3	382.22	3256.08	3085.95	337.571	2748.38	5.83112	4.92191
177	30	807.9	110.785	697.115	3627.97	382.22	3245.75	2285.3	337.571	1947.73	4.65597	2.79398
178	54	629.722	110.785	518.937	3749.61	382.22	3367.39	2820.52	337.571	2482.95	6.48901	4.78468
179	11	716.364	110.785	605.579	3616.64	382.22	3234.42	1661.09	337.571	1323.52	5.34103	2.18554
180	68	689.088	110.785	578.303	3622.03	382.22	3239.81	3025.24	337.571	2687.66	5.60227	4.6475
181	356	797.52	110.785	686.735	3431.22	382.22	3049	2553.06	337.571	2215.49	4.43984	3.22611
182	524	822.242	110.785	711.457	3749.5	382.22	3367.28	3016.61	337.571	2679.04	4.73294	3.76556
183	294	846.49	110.785	735.705	3478.14	382.22	3095.92	2503.96	337.571	2166.39	4.2081	2.94464
184	59	833.407	110.785	722.622	4053.53	382.22	3671.3	3016.36	337.571	2678.79	5.08053	3.70703
185	207	706.087	110.785	595.302	3917.32	382.22	3535.1	2388.48	337.571	2050.91	5.93834	3.44515
186	278	822.115	110.785	711.33	3433.89	382.22	3051.67	2725.93	337.571	2388.36	4.29009	3.35759
187	10	474.6	110.785	363.815	3946.5	382.22	3564.28	2553.8	337.571	2216.23	9.79695	6.09164
188	51	752.882	110.785	642.097	3918	382.22	3535.78	2821.37	337.571	2483.8	5.50661	3.86827
189	252	821.595	110.785	710.81	3918.06	382.22	3535.84	2724.61	337.571	2387.04	4.97438	3.3582
190	133	735.714	110.785	624.929	3762.81	382.22	3380.59	2924.95	337.571	2587.38	5.40956	4.14027
191	143	781.776	110.785	670.991	3797.54	382.22	3415.32	2556.97	337.571	2219.39	5.08996	3.30764
192	397	778.554	110.785	667.769	3981.31	382.22	3599.09	2285.36	337.571	1947.79	5.38972	2.91686
193	40	746	110.785	635.215	4089.05	382.22	3706.83	3478.62	337.571	3141.05	5.83555	4.94487
194	444	786.588	110.785	675.803	3459.06	382.22	3076.84	2818.72	337.571	2481.15	4.55286	3.6714
195	62	762.387	110.785	651.602	3768.76	382.22	3386.54	3063.93	337.571	2726.36	5.19725	4.18409
196	18	938.611	110.785	827.826	3636.22	382.22	3254	3205.67	337.571	2868.1	3.93078	3.46461
197	37	780.108	110.785	669.323	3805.03	382.22	3422.81	3191.65	337.571	2854.08	5.11383	4.26413
198	540	693.787	110.785	583.002	3437.17	382.22	3054.95	2565.18	337.571	2227.61	5.24003	3.82093
199	36	850.222	110.785	739.437	3652.17	382.22	3269.95	2618.28	337.571	2280.71	4.42221	3.08438
200	103	545.505	110.785	434.72	3778.47	382.22	3396.25	3246	337.571	2908.43	7.81249	6.69035
201	51	546.706	110.785	435.921	3898.88	382.22	3516.66	2210.94	337.571	1873.37	8.0672	4.2975
202	75	834.24	110.785	723.455	4012.67	382.22	3630.45	2947.85	337.571	2610.28	5.01821	3.60808
203	57	710.035	110.785	599.25	3627.25	382.22	3245.03	2744.28	337.571	2406.71	5.41514	4.0162
204	34	751.529	110.785	640.744	3871.15	382.22	3488.93	3290.21	337.571	2952.64	5.44512	4.60813
205	20	703.3	110.785	592.515	4029.65	382.22	3647.43	2588	337.571	2250.43	6.15584	3.7981
206	107	682.673	110.785	571.888	3762.1	382.22	3379.88	1802.72	337.571	1465.15	5.91004	2.56195
207	76	700.132	110.785	589.347	3798.96	382.22	3416.74	2945.08	337.571	2607.51	5.7975	4.4244
208	10	530.5	110.785	419.715	3720.7	382.22	3338.48	2148.5	337.571	1810.93	7.95416	4.31466
209	10	795.5	110.785	684.715	3450.9	382.22	3068.68	2370.8	337.571	2033.23	4.48169	2.96945
210	83	791.096	110.785	680.311	4046.52	382.22	3664.3	3225.05	337.571	2887.48	5.38621	4.24435
211	49	643	110.785	532.215	4047.33	382.22	3665.11	3022.71	337.571	2685.14	6.88651	5.04522
212	211	728.422	110.785	617.637	3820.52	382.22	3438.3	3259.15	337.571	2921.58	5.56686	4.73026
213	35	687	110.785	576.215	3995.89	382.22	3613.67	2415.11	337.571	2077.54	6.27138	3.6055
214	187	747.572	110.785	636.787	3764.51	382.22	3382.29	2749.79	337.571	2412.22	5.3115	3.7881
215	79	700.886	110.785	590.101	3907.06	382.22	3524.84	3132.34	337.571	2794.77	5.97329	4.73609
216	102	748.657	110.785	637.872	3458.37	382.22	3076.15	3073.96	337.571	2736.39	4.82252	4.28987
217	24	692.25	110.785	581.465	3857.67	382.22	3475.45	2875.5	337.571	2537.93	5.97705	4.36471
218	11	622.545	110.785	511.76	2896.09	382.22	2513.87	1966.18	337.571	1628.61	4.91221	3.18237
219	328	767.982	110.785	657.197	3499.22	382.22	3117	2784.82	337.571	2447.25	4.74286	3.72377
220	39	749.641	110.785	638.856	3786.1	382.22	3403.88	3252.87	337.571	2915.3	5.32809	4.56331
221	19	957.263	110.785	846.478	2548.53	382.22	2166.31	2209.21	337.571	1871.64	2.5592	2.21109
222	107	796.533	110.785	685.748	3771.16	382.22	3388.94	2745.81	337.571	2408.24	4.94196	3.51185
223	33	572.455	110.785	461.67	3730.3	382.22	3348.08	2050.94	337.571	1713.37	7.25211	3.71124
224	60	728.867	110.785	618.082	4052.27	382.22	3670.05	3082.15	337.571	2744.58	5.9378	4.44048
225	227	709.132	110.785	598.347	3471.14	382.22	3088.92	2824.5	337.571	2486.93	5.16243	4.15634
226	24	668.917	110.785	558.132	3922.88	382.22	3540.65	2902.04	337.571	2564.47	6.34376	4.59474
227	199	639.563	110.785	528.778	3826.93	382.22	3444.71	2393.18	337.571	2055.61	6.51447	3.88747
228	67	811.507	110.785	700.722	4033.31	382.22	3651.09	3249.21	337.571	2911.64	5.21047	4.1552
