# Supplementary material for: Biochemical reconstitution of branching microtubule nucleation
Source: eLife. 2020 Jan 14;9:e49797. doi: 10.7554/eLife.49797 (PMC6959992; doi:10.7554/eLife.49797)
Supplement: Figure 3—source data 1. — Numerical data obtained from the experiment in Figure 3A–B, and represented graphically in Figure 3C. [file elife-49797-fig3-data1.xlsx]

## Sheet: Sheet1
GMPCPP MT length	Position of branching event	Fractional distance along GMPCPP MT
2.187	1.58	0.722451
2.187	0.243	0.111111
3.907	0.335	0.0857435
3.907	3.311	0.847453
3.663	1.354	0.369642
2.445	1.522	0.622495
2.445	0.979	0.400409
1.598	0.55	0.34418
2.716	1.087	0.400221
2.918	1.034	0.354352
2.918	2.618	0.89719
5.488	0.384	0.0699708
5.412	0	0
5.488	3.346	0.609694
5.488	5.05	0.92019
13.741	11.383	0.828397
13.741	4.296	0.312641
13.741	0.778	0.0566189
13.741	0.773	0.056255
9.211	0.773	0.0839214
2.646	0.55	0.207861
2.497	0.815	0.326392
5.149	4.965	0.964265
5.149	2.787	0.54127
5.149	1.152	0.223733
5.149	0.31	0.0602059
3.368	0.522	0.154988
3.368	3.292	0.977435
1.552	0.129	0.0831186
5.534	2.656	0.479942
5.534	4.671	0.844055
3.221	2.407	0.747283
3.221	2.407	0.747283
8.126	0.387	0.0476249
3.78	2.319	0.613492
13.817	2.202	0.159369
13.817	11.033	0.798509
4.382	3.092	0.705614
4.92	4.734	0.962195
4.92	4.566	0.928049
5.711	3.271	0.572754
6.361	1.188	0.186763
6.361	4.667	0.73369
6.361	5.542	0.871247
6.19	2.628	0.424556
2.829	0.864	0.305408
3.519	2.538	0.721228
3.519	0.784	0.222791
7.491	5.923	0.790682
7.491	5.923	0.790682
2.757	0.288	0.104461
5.257	5.221	0.993152
7.749	2.577	0.332559
3.612	0.708	0.196013
3.612	2.26	0.625692
15.366	9.773	0.636015
15.366	6.755	0.439607
6.874	0.543	0.0789933
6.874	2.754	0.40064
6.874	3.966	0.576957
6.705	2.323	0.346458
6.705	3.737	0.557345
3.481	1.37	0.393565
3.481	1.37	0.393565
5.935	4.731	0.797136
2.19	0.288	0.131507
7.116	6.744	0.947723
7.116	5.051	0.709809
4.448	3.231	0.726394
4.448	4.3	0.966727
4.448	4.141	0.93098
4.448	2.066	0.464478
9.293	2.733	0.294092
9.293	5.102	0.549015
4.403	2.775	0.630252
4.403	1.152	0.26164
3.469	3.35	0.965696
4.83	0.182	0.0376812
4.83	1.093	0.226294
4.83	2.921	0.604762
2.037	1.858	0.912126
2.037	0.465	0.228277
7.955	5.509	0.69252
7.955	2.319	0.291515
3.221	0.258	0.0800993
3.221	1.808	0.561316
3.221	3.008	0.933871
11.713	9.601	0.819688
11.713	3.582	0.305814
3.831	1.902	0.496476
3.831	1.902	0.496476
3.831	2.445	0.638215
2.013	1.152	0.57228
5.932	2.706	0.45617
5.57	0.429	0.0770197
5.57	2.154	0.386715
5.57	5.186	0.931059
18.648	0.644	0.0345345
18.648	5.479	0.293812
18.648	6.178	0.331296
18.648	11.592	0.621622
18.648	14.584	0.782068
18.648	16.585	0.889372
18.648	18.131	0.972276
18.648	18.131	0.972276
18.648	18.131	0.972276
3.918	0.638	0.162838
1.039	0.751	0.72281
3.244	0.387	0.119297
3.244	1.937	0.597102
3.244	2.838	0.874846
3.244	2.838	0.874846
3.244	2.838	0.874846
7.732	6.313	0.816477
6.292	5.359	0.851716
7.354	1.417	0.192684
7.354	7.226	0.982595
3.589	3.26	0.908331
7.42	3.519	0.474259
21.008	3.628	0.172696
21.008	5.084	0.242003
21.008	6.057	0.288319
21.008	13.016	0.619573
21.008	15.728	0.748667
21.008	20.361	0.969202
4.003	1.295	0.323507
5.012	0.729	0.145451
5.012	1.65	0.32921
2.202	0.531	0.241144
9.667	3.756	0.388538
9.667	7.988	0.826316
7.655	2.28	0.297845
7.655	2.826	0.36917
7.655	4.465	0.583279
7.655	5.558	0.726061
1.68	0.258	0.153571
2.319	0.129	0.0556274
2.319	1.675	0.722294
1.967	1.152	0.585663
4.783	3.103	0.648756
6.572	3.224	0.490566
2.113	0.929	0.439659
1.729	0.182	0.105263
4.195	0.644	0.153516
3.98	1.68	0.422111
8.113	7.09	0.873906
8.113	1.971	0.242943
2.475	1.68	0.678788
6.823	3.969	0.581709
6.7	2.966	0.442687
5.37	3.876	0.721788
5.37	0.465	0.0865922
2.538	1.108	0.436564
3.041	2.502	0.822756
3.382	0.531	0.157008
3.116	1.695	0.543967
3.116	1.695	0.543967
2.448	0.258	0.105392
2.448	1.288	0.526144
2.448	1.288	0.526144
8.894	3.095	0.347987
8.894	4.938	0.555206
2.488	1.614	0.648714
5.469	3.138	0.573779
5.469	3.138	0.573779
2.835	0.531	0.187302
2.835	1.469	0.518166
2.835	2.323	0.8194
1.188	0.465	0.391414
1.188	1.006	0.846801
1.188	1.006	0.846801
2.194	1.16	0.528715
2.205	0.515	0.23356
2.205	1.288	0.584127
2.205	1.804	0.818141
5.438	3.594	0.660905
7.85	6.515	0.829936
7.85	6.515	0.829936
7.85	5.482	0.698344
7.85	4.857	0.618726
7.85	3.457	0.440382
7.85	3.457	0.440382
7.85	0.644	0.0820382
10.55	4.381	0.415261
4.046	4.046	1
2.577	0.515	0.199845
6.218	5.051	0.812319
2.557	0.731	0.285882
2.557	0.344	0.134533
2.553	1.922	0.75284
2.323	0.773	0.332759
3.039	1.167	0.384008
8.343	0.387	0.0463862
8.343	1.192	0.142874
8.343	2.116	0.253626
8.343	2.32	0.278077
8.343	3.577	0.428743
8.343	4.752	0.569579
8.343	6.443	0.772264
8.343	7.602	0.911183
