# Supplementary material for: Biochemical reconstitution of branching microtubule nucleation
Source: eLife. 2020 Jan 14;9:e49797. doi: 10.7554/eLife.49797 (PMC6959992; doi:10.7554/eLife.49797)
Supplement: Figure 3—source data 2. — Numerical data obtained from the experiment in Figure 3A–B and Figure 3—figure supplement 2, and represented graphically in Figure 3E. [file elife-49797-fig3-data2.xlsx]

## Sheet: Sheet1
	Replicate	# of branches	GMPCPP MT length (um)	# of branches per GMPCPP MT length (1/um)
Buffer	1	0	14.58	0
	2	0	24.174	0
	3	0	20.262	0
	4	1	34.965	0.0286
Augmin	1	0	27.243	0
	2	0	58.49	0
	3	1	46.247	0.021623
	4	1	21.452	0.0466157
TPX2	1	0	39.155	0
	2	0	24.983	0
	3	1	27.998	0.0357168
	4	1	37.531	0.0266446
gTuRC	1	0	13.018	0
	2	2	26.704	0.0748951
	3	1	23.286	0.0429443
	4	2	18.056	0.110767
Augmin + TPX2	1	0	22.04	0
	2	5	77.354	0.0646379
	3	0	56.122	0
	4	0	40.533	0
Augmin + gTuRC	1	3	21.438	0.139938
	2	1	25.381	0.0393996
	3	7	18.067	0.387447
	4	5	20.014	0.249825
TPX2 + gTuRC	1	7	24.882	0.281328
	2	3	18.807	0.159515
	3	3	18.073	0.165993
	4	3	8.629	0.347665
Augmin + TPX2 + gTuRC	1	12	19.127	0.627385
	2	7	16.846	0.415529
	3	29	39.016	0.743285
	4	13	26.785	0.485346
