# Supplementary material for: Biochemical reconstitution of branching microtubule nucleation
Source: eLife. 2020 Jan 14;9:e49797. doi: 10.7554/eLife.49797 (PMC6959992; doi:10.7554/eLife.49797)
Supplement: Figure 3—source data 3. — Numerical data obtained from the experiment in Figure 3A–B and Figure 3—figure supplement 2, and represented graphically in Figure 3F. [file elife-49797-fig3-data3.xlsx]

## Sheet: Sheet1
Branching angle measurements
Augmin + gTuRC	TPX2 + gTuRC	augmin + TPX2 + gTuRC
162.35	88.059	90
136.332	86.91	136.157
1.014	123.249	14.852
53.273	18.605	58.511
146.31	99.293	53.804
49.399	124.205	42.955
98.16	71.445	21.068
34.413	145.415	87.397
8.267	109.103	115.15
13.046	88.34	67.436
6.938	76.515	114.775
74.745	130.236	118.829
160.337	76.515	87.049
2.131	84.062	25.3
33.69	84.741	52.853
99.203	104.036	50.85
136.591	80.098	83.157
154.942	79.715	36.254
34.102	39.819	151.841
39.529	164.922	86.34
35.48	70.811	54.304
33.495	21.392	128.295
9.545	12.778	13.132
96.093	27.474	22.166
28.385	155.961	55.375
40.533	32.725	70.442
67.215	111.537	83.007
6.066	158.807	34.758
10.178	16.886	119.782
117.92	38.148	77.341
19.29	139.699	69.294
15.967	29.173	88.141
58.707	7.9	95.914
113.371	120.097	83.281
53.842	156.165	36.898
115.56	156.056	90.152
92.159	10.511	34.61
7.815	66.697	147.746
14.284	4.268	24.998
146.641	5.388	10.528
147.776	19.349	141.721
51.499	27.846	135.131
28.564	90.716	100.846
10.087	5.153	105.945
13.241	6.685	82.569
22.62	21.485	91.975
128.945	45.255	158.96
14.47	85.651	18.235
5.569	8.548	120.256
105.314	50.271	137.726
9.334	36.158	136.454
6.869	50.266	19.208
20.311	109.631	28.369
	14.417	47.045
	18.836	11.212
	54.143	68.552
	14.511	178.369
	9.432	25.785
	159.38	144.553
	20.838	148.366
	154.362	115.235
	5.857	110.961
	47.862	38.37
	6.072	144.49
	8.735	65.56
		103.492
		66.864
		138.287
		99.491
		136.949
		135.828
		9.08
		8.227
		23.131
		16.424
		37.698
		136.146
		31.754
		105.784
		144.237
		149.568
		140.301
		59.661
		86.566
		150.814
		128.022
		4.248
		70.06
		88.774
		76.701
		16.659
		10.612
		87.122
		33.758
		87.816
		144.856
		130.508
		48.366
		77.574
		28.05
		60.871
		98.567
		4.563
		24.044
		18.185
		4.256
		18.681
		123.265
		42.901
		50.283
		87.236
		144.094
		152.216
		144.386
		103.134
		72.07
		6.613
		148.798
		81.13
		39.214
		26.565
		113.475
		48.945
		18.29
		66.571
		132.422
		2.407
		39.055
		47.258
		25.493
		25.468
		27.377
		74.259
		112.234
		64.654
		145.008
		143.004
		61.156
		13.822
		97.359
		50.271
		95.389
		11.592
		55.305
		47.291
		146.407
		62.85
		6.439
		90
		56.249
		104.325
		177.899
		99.939
		41.785
		18.055
		58.878
		136.401
		61.324
		10.527
		28.887
		99.09
		68.874
		47.49
		96.911
		130.135
		151.639
		148.798
		133.267
		175.409
		21.533
		158.971
		10.434
		152.6
		26.987
		6.393
		67.788
		65.283
		127.84
		36.87
		20.644
		134.381
		104.362
		133.279
		88.152
		16.268
		125.916
		159.715
		166.629
		4.108
		48.147
		15.744
		75.533
		32.44
		165.256
		13.204
		161.032
		53.55
		15.021
		16.013
		135.712
		68.199
		7.326
		53.973
		14.826
		14.621
		69.653
		69.075
		16.173
		69.59
		105.709
		2.801
		0
		18.435
		131.632
		12.958
		50.312
		0.274
		101.36
		2.858
		61.157
		49.667
		19.801
		6.096
		10.901
		6.382
		11.117
		62.957
		72.687
		29.616
		141.605
		7.736
		31.375
		11.889
		103.153
		175.71
		48.715
		79.742
		73.803
		11.339
		172.56
		98.861
		176.457
		49.292
		6.314
		96.009
		176.775
		172.188
		11.798
		8.012
		70.168
		115.201
		164.624
		147.052
		3.526
		11.77
		113.301
		12.555
		16.246
		117.102
		10.262
		41.065
		150.642
		18.75
