# Supplementary material for: Biochemical reconstitution of branching microtubule nucleation
Source: eLife. 2020 Jan 14;9:e49797. doi: 10.7554/eLife.49797 (PMC6959992; doi:10.7554/eLife.49797)
Supplement: Figure 3—source data 4. — Numerical data obtained from the experiment in Figure 3A–B and Figure 3—figure supplement 2, and represented graphically in Figure 3—figure supplement 3A. [file elife-49797-fig3-data4.xlsx]

## Sheet: Sheet1
	Replicate	# Non-branched MTs
Buffer	1	14
	2	10
	3	17
	4	13
Augmin	1	15
	2	14
	3	13
	4	10
TPX2	1	13
	2	10
	3	12
	4	18
gTuRC	1	38
	2	40
	3	32
	4	34
Augmin + TPX2	1	11
	2	12
	3	16
	4	18
Augmin + gTuRC	1	37
	2	33
	3	29
	4	43
TPX2 + gTuRC	1	37
	2	33
	3	36
	4	42
Augmin + TPX2 + gTuRC	1	34
	2	35
	3	42
	4	38
