# Supplementary material for: Biochemical reconstitution of branching microtubule nucleation
Source: eLife. 2020 Jan 14;9:e49797. doi: 10.7554/eLife.49797 (PMC6959992; doi:10.7554/eLife.49797)
Supplement: Figure 3—source data 5. — Numerical data represented graphically in Figure 3G. [file elife-49797-fig3-data5.xlsx]

## Sheet: Sheet1
	Replicate	# of branches	GMPCPP MT length (um)	# of branches per GMPCPP MT length (1/um)
Augmin then TPX2 + gTuRC	1	6	64.777	0.0926255
	2	8	77.669	0.103001
	3	6	44.145	0.135916
	4	10	53.268	0.18773
TPX2 then Augmin + gTuRC	1	40	74.755	0.535081
	2	32	35.511	0.901129
	3	38	86.573	0.438936
	4	37	69.441	0.532826
Augmin + gTuRC then TPX2	1	10	57.403	0.174207
	2	6	25.677	0.233672
	3	12	54.377	0.220682
	4	12	20.768	0.577812
